# Supplementary material
Source: publisher figshare collection journal article supplement (https://gsajournals.figshare.com/articles/dataset/_/8095457)
Supplement: Supplementary file 1 [file 1]

## Sheet: Key
Splice site types
DA	known donor-acceptor		Supplementary Table S4 - Re-mapping and analysis of splice junctions in alg-1 or alg-2 knockout strains
NDA	novel donor-acceptor
D	known donor, novel acceptor
A	known acceptor, novel donor
N	novel acceptor, novel donor

## Sheet: DA
Gene	Chromosome	Start	End	Splice junction score wt	Splice junction score alg-1	Splice junction score alg-2	Normalized wt	Normalized alg-1	Normalized alg-2	log2 fold change alg-1/wt	log2 fold change alg-2/wt	Strand	Splice site
Y62H9A.5	X	11882723	11882823	11	502	170	0.384122	19.0006	4.48825	5.62834	3.54652	-	NN-NN
oat-1	IV	8466575	8471570	15	622	429	0.523803	23.5426	11.3262	5.49011	4.4345	-	NN-NN
K10D11.2	IV	12981348	12981517	11	379	23	0.384122	14.3451	0.607234	5.22285	0.660688	+	gt-ag
col-129	IV	12109641	12110102	26	883	664	0.907925	33.4214	17.5306	5.20206	4.27116	-	NN-NN
Y57G11C.42	IV	14741992	14742527	21	589	536	0.733324	22.2936	14.1512	4.92603	4.27033	+	gt-ag
K10G9.2	III	10287766	10288197	10	279	182	0.349202	10.5601	4.80507	4.91842	3.78242	+	gt-ag
hum-9	IV	9276813	9276926	11	302	295	0.384122	11.4307	7.78844	4.8952	4.3417	+	gt-ag
R03C1.1	II	14907676	14907809	10	257	243	0.349202	9.72741	6.41556	4.79992	4.19944	-	NN-NN
spp-8	IV	8482636	8482744	14	346	140	0.488883	13.096	3.69621	4.7435	2.91849	+	gt-ag
grl-1	V	5531051	5531625	10	237	127	0.349202	8.97041	3.35299	4.68304	3.26331	-	NN-NN
Y68A4A.13	V	17207388	17207590	35	822	201	1.22221	31.1126	5.3067	4.66994	2.11833	-	NN-NN
W05B5.1	I	13043107	13043814	11	253	202	0.384122	9.57601	5.3331	4.63979	3.79534	+	gt-ag
B0205.14	I	10726992	10727177	19	437	372	0.663484	16.5404	9.82135	4.63979	3.88779	+	gt-ag
C06B8.7	V	15509745	15510692	13	293	225	0.453962	11.09	5.94034	4.61054	3.7099	+	gt-ag
W08A12.3	V	3683174	3683513	11	247	238	0.384122	9.34891	6.28355	4.60516	4.03194	+	gt-ag
F18E9.3	X	8589117	8589402	10	222	379	0.349202	8.40266	10.0062	4.58871	4.84068	+	gt-ag
nmtn-1	I	6479146	6479702	14	305	224	0.488883	11.5442	5.91393	4.56154	3.59656	-	NN-NN
D1054.10	V	10792253	10792345	17	365	89	0.593643	13.8152	2.34973	4.54052	1.98483	-	NN-NN
F09B12.7	X	15093866	15094934	10	207	170	0.349202	7.83492	4.48825	4.48778	3.68402	-	NN-NN
pde-3	II	14945317	14949791	10	206	147	0.349202	7.79707	3.88102	4.4808	3.4743	+	gt-ag
Y87G2A.16	I	13560933	13561412	10	206	27	0.349202	7.79707	0.71284	4.4808	1.02952	+	gt-ag
npr-5	V	277369	277967	14	288	249	0.488883	10.9008	6.57397	4.4788	3.74921	-	NN-NN
parg-2	IV	8712738	8713132	34	699	57	1.18729	26.457	1.50489	4.47791	0.341985	-	NN-NN
fbl-1	IV	9541753	9542728	14	286	445	0.488883	10.8251	11.7487	4.46874	4.58686	+	gt-ag
C54E4.4	IV	2163562	2164015	12	245	181	0.419042	9.27321	4.77867	4.4679	3.51144	-	NN-NN
pqn-72	I	3270533	3273028	16	322	652	0.558723	12.1876	17.2138	4.44714	4.94529	-	NN-NN
gon-14	V	6609060	6609176	13	261	112	0.453962	9.87881	2.95697	4.44369	2.70347	-	NN-NN
E01B7.1	V	17931324	17931398	10	199	32	0.349202	7.53212	0.844848	4.43092	1.27463	+	gt-ag
Y57G11C.42	IV	14742853	14744047	23	455	506	0.803164	17.2217	13.3592	4.42239	4.05599	+	gt-ag
atln-2	IV	14993318	14994364	12	237	208	0.419042	8.97041	5.49151	4.42001	3.71204	+	gt-ag
hmit-1.2	V	18526324	18526739	15	292	242	0.523803	11.0522	6.38916	4.39916	3.60853	+	gt-ag
B0198.3	X	12048951	12049218	12	232	138	0.419042	8.78116	3.64341	4.38924	3.12012	-	NN-NN
let-19	II	8774474	8774866	14	265	379	0.488883	10.0302	10.0062	4.35872	4.35526	+	gt-ag
C52B9.8	X	4300242	4300317	17	317	296	0.593643	11.9984	7.81484	4.3371	3.71855	-	NN-NN
Y40B10A.9	V	2070339	2071487	12	216	49	0.419042	8.17557	1.29367	4.28615	1.62631	-	NN-NN
tyr-2	III	13744740	13744936	31	556	887	1.08253	21.0445	23.4181	4.28097	4.43515	+	gt-ag
Y51H1A.2	II	13858798	13860668	29	517	138	1.01269	19.5684	3.64341	4.27227	1.8471	-	NN-NN
par-2	III	1084133	1084337	10	178	112	0.349202	6.73727	2.95697	4.27003	3.08198	+	gt-ag
gadr-6	I	14082130	14082290	11	195	105	0.384122	7.38072	2.77216	4.26412	2.85137	-	NN-NN
dct-5	II	5436157	5436257	36	635	864	1.25713	24.0346	22.8109	4.25691	4.18152	-	NN-NN
K02C4.3	II	8083077	8083629	10	176	192	0.349202	6.66157	5.06909	4.25373	3.85959	-	NN-NN
E01B7.1	V	17933625	17934017	10	175	152	0.349202	6.62372	4.01303	4.24551	3.52256	+	gt-ag
ZK970.7	II	10312631	10312715	64	1103	551	2.23489	41.7484	14.5472	4.22344	2.70247	+	gt-ag
C29E4.13	III	7928084	7928165	12	206	79	0.419042	7.79707	2.08572	4.21776	2.31538	-	NN-NN
B0034.1	II	5970153	5970965	20	343	74	0.698404	12.9825	1.95371	4.21636	1.48408	+	gt-ag
T25D10.4	II	6407987	6408077	17	290	112	0.593643	10.9765	2.95697	4.20867	2.31645	-	NN-NN
frl-1	III	2147971	2148883	27	460	304	0.942845	17.4109	8.02605	4.20683	3.0896	+	gt-ag
pha-4	V	20757844	20758157	15	255	303	0.523803	9.65171	7.99965	4.20369	3.93284	+	gt-ag
sgn-1	II	8782737	8783036	12	202	81	0.419042	7.64567	2.13852	4.18947	2.35145	-	NN-NN
F22G12.5	I	13172624	13173157	10	168	192	0.349202	6.35877	5.06909	4.18662	3.85959	+	gt-ag
twk-8	IV	9084442	9084538	10	167	269	0.349202	6.32092	7.102	4.178	4.34609	+	gt-ag
R151.1	III	7219557	7219984	10	166	77	0.349202	6.28307	2.03291	4.16934	2.54142	+	gt-ag
T28C12.4	V	6323695	6323778	25	415	246	0.873005	15.7077	6.49477	4.16934	2.89522	+	gt-ag
cyd-1	II	12988336	12988631	10	165	39	0.349202	6.24522	1.02966	4.16062	1.56003	+	gt-ag
sma-5	X	12001387	12004978	10	164	28	0.349202	6.20737	0.739242	4.15185	1.08198	-	NN-NN
C38D9.2	V	17570180	17570350	22	359	243	0.768244	13.5881	6.41556	4.14463	3.06194	+	gt-ag
mlt-7	II	4404082	4404335	35	571	750	1.22221	21.6123	19.8011	4.14429	4.01802	+	gt-ag
mlh-1	III	13513330	13514025	14	227	177	0.488883	8.59191	4.67306	4.13542	3.25681	-	NN-NN
klp-20	III	221732	222063	10	162	264	0.349202	6.13167	6.96999	4.13415	4.31902	+	gt-ag
lin-12	III	9066913	9067929	23	369	266	0.803164	13.9666	7.0228	4.12014	3.12828	-	NN-NN
reps-1	V	18988813	18988914	12	192	166	0.419042	7.26717	4.38265	4.11623	3.38664	-	NN-NN
Y70D2A.1	X	14918925	14920865	17	272	346	0.593643	10.2952	9.13492	4.11623	3.94372	+	gt-ag
Y105E8A.25	I	14587139	14589198	11	175	190	0.384122	6.62372	5.01628	4.10801	3.70698	-	NN-NN
lagr-1	I	13727668	13728450	19	300	149	0.663484	11.355	3.93382	4.09712	2.5678	-	NN-NN
trpp-10	I	1908505	1910215	12	187	140	0.419042	7.07792	3.69621	4.07816	3.14088	+	gt-ag
pqn-37	X	3249807	3250361	19	296	146	0.663484	11.2036	3.85462	4.07775	2.53846	-	NN-NN
adt-1	X	12682353	12682906	11	170	193	0.384122	6.43447	5.09549	4.06619	3.72958	+	gt-ag
T24B8.4	II	9067660	9068702	18	277	199	0.628563	10.4844	5.2539	4.06004	3.06326	-	NN-NN
C07B5.4	X	9529764	9531971	12	184	44	0.419042	6.96437	1.16167	4.05483	1.47103	+	gt-ag
R12A1.3	V	1424441	1425289	13	199	300	0.453962	7.53212	7.92045	4.05241	4.12494	-	NN-NN
rpm-1	V	8818463	8818602	13	199	219	0.453962	7.53212	5.78193	4.05241	3.67091	-	NN-NN
F07B7.12	V	8860557	8860696	13	199	219	0.453962	7.53212	5.78193	4.05241	3.67091	-	NN-NN
flp-14	III	12910643	12911594	21	321	461	0.733324	12.1498	12.1711	4.05034	4.05286	+	gt-ag
polq-1	III	5796961	5797152	15	229	218	0.523803	8.66761	5.75553	4.04854	3.45785	-	NN-NN
cpg-4	V	5997753	5997856	26	396	370	0.907925	14.9885	9.76855	4.04514	3.4275	+	gt-ag
C24A1.3	III	696140	696281	18	274	170	0.628563	10.3709	4.48825	4.04433	2.83602	-	NN-NN
ZC434.9	I	10359945	10360189	10	151	432	0.349202	5.71533	11.4054	4.0327	5.02952	+	gt-ag
amx-2	I	12760024	12760238	22	331	386	0.768244	12.5283	10.191	4.02748	3.72958	-	NN-NN
otpl-3	X	6923090	6923616	12	180	162	0.419042	6.81297	4.27704	4.02312	3.35145	-	NN-NN
C17H1.7	I	13137658	13137821	12	180	15	0.419042	6.81297	0.396022	4.02312	-0.0815138	-	NN-NN
pef-1	III	925575	926199	10	149	118	0.349202	5.63963	3.11538	4.01347	3.15727	-	NN-NN
nhr-25	X	13012573	13012991	32	473	440	1.11745	17.903	11.6167	4.00192	3.37792	+	gt-ag
T12B3.2	IV	7377383	7377677	17	250	147	0.593643	9.46246	3.88102	3.99455	2.70877	+	gt-ag
Y50D4B.1	V	1113141	1122045	10	147	241	0.349202	5.56393	6.36276	3.99397	4.18752	+	gt-ag
F21G4.6	X	9915369	9915534	10	147	120	0.349202	5.56393	3.16818	3.99397	3.18152	-	NN-NN
best-24	III	7901707	7902141	26	381	120	0.907925	14.4208	3.16818	3.98943	1.80301	+	gt-ag
rbf-1	III	6697065	6697405	18	262	194	0.628563	9.91666	5.12189	3.97972	3.02655	+	gt-ag
mam-3	IV	13442760	13443149	11	160	407	0.384122	6.05597	10.7454	3.97872	4.80601	-	NN-NN
F10D11.6	I	8446629	8446831	95	1377	1688	3.31742	52.1192	44.5657	3.97368	3.7478	-	NN-NN
gbb-1	X	2958180	2958705	10	144	190	0.349202	5.45038	5.01628	3.96422	3.84449	+	gt-ag
F53B1.8	X	2125537	2125878	18	259	148	0.628563	9.80311	3.90742	3.96311	2.63609	-	NN-NN
T26E3.10	I	12682096	12682595	29	416	123	1.01269	15.7455	3.24738	3.95868	1.68109	-	NN-NN
Y75B8A.44	III	12194681	12196804	18	258	134	0.628563	9.76526	3.5378	3.95753	2.49272	+	gt-ag
Y57G11C.42	IV	14735042	14735511	43	611	414	1.50157	23.1263	10.9302	3.94499	2.86378	+	gt-ag
mrp-7	V	19678861	19679044	25	353	250	0.873005	13.361	6.60037	3.93589	2.91849	+	gt-ag
flr-4	X	15092178	15092302	15	210	84	0.523803	7.94847	2.21773	3.92358	2.08198	+	gt-ag
Y87G2A.16	I	13560755	13560832	25	349	44	0.873005	13.2096	1.16167	3.91945	0.412134	+	gt-ag
cho-1	IV	13213424	13213732	12	167	72	0.419042	6.32092	1.90091	3.91497	2.18152	-	NN-NN
F13C5.2	X	594054	594146	17	235	169	0.593643	8.89471	4.46185	3.90528	2.90997	+	gt-ag
npr-5	V	278040	278175	14	193	200	0.488883	7.30502	5.2803	3.90133	3.43306	-	NN-NN
T07A9.12	IV	414351	414442	28	386	181	0.977765	14.61	4.77867	3.90133	2.28905	+	gt-ag
F07H5.8	II	8803833	8803944	18	248	353	0.628563	9.38676	9.31973	3.9005	3.89016	+	gt-ag
pkc-1	V	12017374	12017733	13	179	85	0.453962	6.77512	2.24413	3.8996	2.30551	-	NN-NN
ZK180.5	IV	4515475	4515547	28	384	1239	0.977765	14.5343	32.7114	3.89383	5.06416	-	NN-NN
C38D9.2	V	17569389	17569756	28	382	223	0.977765	14.4586	5.88753	3.8863	2.5901	+	gt-ag
R05H10.3	II	14881377	14882610	13	177	143	0.453962	6.69942	3.77541	3.88339	3.05599	+	gt-ag
C54D10.10	V	12449359	12449813	17	230	90	0.593643	8.70546	2.37613	3.87425	2.00095	-	NN-NN
fbxa-150	V	20523894	20524108	10	134	191	0.349202	5.07188	5.04268	3.86039	3.85206	+	gt-ag
madd-4	I	8934569	8934997	21	281	96	0.733324	10.6358	2.53454	3.85833	1.7892	-	NN-NN
myo-5	V	8110516	8111177	14	187	405	0.488883	7.07792	10.6926	3.85577	4.45098	+	gt-ag
bpl-1	II	6275096	6275186	14	187	33	0.488883	7.07792	0.871249	3.85577	0.833597	+	gt-ag
acd-1	I	4107443	4107811	25	332	84	0.873005	12.5661	2.21773	3.84741	1.34502	+	gt-ag
W05B10.4	V	12668306	12668850	22	291	178	0.768244	11.0143	4.69947	3.84167	2.61286	+	gt-ag
B0034.1	II	5971120	5971597	22	291	157	0.768244	11.0143	4.14503	3.84167	2.43175	+	gt-ag
F53A2.3	III	13337128	13337218	11	145	101	0.384122	5.48823	2.66655	3.8367	2.79534	-	NN-NN
par-2	III	1091697	1092629	14	184	163	0.488883	6.96437	4.30344	3.83243	3.13793	+	gt-ag
M106.8	II	10841802	10842349	22	289	198	0.768244	10.9386	5.2275	3.83172	2.76648	-	NN-NN
gbb-2	IV	4490358	4490530	21	274	110	0.733324	10.3709	2.90416	3.82194	1.9856	-	NN-NN
B0303.4	III	8690248	8690335	23	300	193	0.803164	11.355	5.09549	3.82148	2.66545	+	gt-ag
glt-6	IV	7504263	7504346	12	156	45	0.419042	5.90458	1.18807	3.81667	1.50345	+	gt-ag
mod-5	I	3035446	3038593	15	194	151	0.523803	7.34287	3.98663	3.80925	2.92807	-	NN-NN
Y53C10A.10	I	12022327	12022499	10	129	51	0.349202	4.88263	1.34648	3.80553	1.94706	+	gt-ag
Y77E11A.12	IV	1464353	1464892	11	140	268	0.384122	5.29898	7.0756	3.78608	4.20322	-	NN-NN
mig-13	X	4798133	4798492	14	177	48	0.488883	6.69942	1.26727	3.77648	1.37417	-	NN-NN
tmc-1	X	1175053	1175169	22	278	25	0.768244	10.5223	0.660037	3.77574	-0.219017	+	gt-ag
cdh-4	III	4520695	4521013	12	151	117	0.419042	5.71533	3.08897	3.76967	2.88196	+	gt-ag
C33F10.4	II	4795962	4796278	10	125	73	0.349202	4.73123	1.92731	3.76008	2.46445	+	gt-ag
toh-1	III	3807461	3807968	38	474	871	1.32697	17.9408	22.9957	3.75704	4.11516	-	NN-NN
unc-96	X	611615	612355	15	185	143	0.523803	7.00222	3.77541	3.74072	2.84954	-	NN-NN
oat-1	IV	8465007	8465238	45	555	362	1.57141	21.0067	9.55734	3.74072	2.60455	-	NN-NN
F19B10.4	II	3660129	3660232	10	123	84	0.349202	4.65553	2.21773	3.73681	2.66695	+	gt-ag
dhhc-14	X	8554958	8555206	23	282	219	0.803164	10.6737	5.78193	3.73222	2.84778	+	gt-ag
ZC239.22	II	3220346	3220623	10	122	51	0.349202	4.61768	1.34648	3.72504	1.94706	-	NN-NN
F59A1.15	V	17683063	17683706	16	195	17	0.558723	7.38072	0.448825	3.72356	-0.315979	-	NN-NN
F09C8.2	X	16145979	16146203	14	170	160	0.488883	6.43447	4.22424	3.71826	3.11113	-	NN-NN
F47G3.1	X	2387817	2388575	10	121	114	0.349202	4.57983	3.00977	3.71316	3.10752	+	gt-ag
perm-2	IV	1126884	1127719	22	265	131	0.768244	10.0302	3.4586	3.70664	2.17055	+	gt-ag
sop-3	I	2761513	2762147	24	289	162	0.838084	10.9386	4.27704	3.70619	2.35145	-	NN-NN
col-115	IV	7989567	7990012	25	301	254	0.873005	11.3928	6.70598	3.70599	2.94139	+	gt-ag
T28C12.4	V	6325816	6325935	63	757	628	2.19997	28.6523	16.5801	3.7031	2.9139	+	gt-ag
nhr-106	V	489790	490009	10	120	58	0.349202	4.54198	1.53129	3.70119	2.13261	+	gt-ag
F54C8.6	III	9445291	9446088	10	120	17	0.349202	4.54198	0.448825	3.70119	0.362093	-	NN-NN
lin-8	II	3058865	3059917	14	167	183	0.488883	6.32092	4.83147	3.69258	3.3049	+	gt-ag
atm-1	I	189963	190557	27	322	243	0.942845	12.1876	6.41556	3.69226	2.76648	+	gt-ag
nspb-12	III	5568560	5568736	12	143	367	0.419042	5.41253	9.68935	3.69113	4.53123	-	NN-NN
D2007.2	III	8153817	8154328	21	250	357	0.733324	9.46246	9.42533	3.68969	3.68402	+	gt-ag
F56D2.5	III	5579104	5579340	24	285	230	0.838084	10.7872	6.07234	3.68608	2.85709	-	NN-NN
F21C10.3	V	9129933	9130080	22	261	173	0.768244	9.87881	4.56746	3.6847	2.57175	+	gt-ag
E02C12.8	V	9372834	9373279	18	213	46	0.628563	8.06202	1.21447	3.68101	0.950195	-	NN-NN
Y92H12A.5	I	1501233	1502689	15	177	100	0.523803	6.69942	2.64015	3.67694	2.33352	-	NN-NN
spsb-1	II	15207571	15220192	63	742	784	2.19997	28.0846	20.6988	3.67422	3.23399	+	gt-ag
R17.3	III	10836534	10837423	11	129	127	0.384122	4.88263	3.35299	3.66802	3.12581	+	gt-ag
Y73B6BL.44	IV	6495261	6496398	14	164	129	0.488883	6.20737	3.40579	3.66642	2.80043	+	gt-ag
F25H5.5	I	9161648	9162063	13	152	350	0.453962	5.75318	9.24052	3.66371	4.34733	-	NN-NN
axl-1	I	8513990	8514125	13	152	102	0.453962	5.75318	2.69295	3.66371	2.56854	+	gt-ag
zim-3	IV	10559604	10559762	11	128	148	0.384122	4.84478	3.90742	3.65679	3.34658	+	gt-ag
ptp-1	III	3609222	3609685	30	347	491	1.04761	13.1339	12.9631	3.64813	3.62925	+	gt-ag
clip-1	III	9263109	9263564	46	530	634	1.60633	20.0604	16.7385	3.64251	3.38134	-	NN-NN
rom-4	IV	17013154	17014416	23	265	299	0.803164	10.0302	7.89405	3.64251	3.297	+	gt-ag
C29F3.3	V	15347002	15347266	137	1568	1584	4.78407	59.3486	41.82	3.6329	3.12788	-	NN-NN
nas-36	I	7529818	7529930	23	263	572	0.803164	9.95451	15.1017	3.63158	4.23287	+	gt-ag
fos-1	V	6008823	6011101	12	137	176	0.419042	5.18543	4.64666	3.6293	3.47103	+	gt-ag
nhr-27,pgp-14	X	12748963	12749224	117	1329	1517	4.08566	50.3024	40.0511	3.62199	3.2932	-	NN-NN
ser-4	III	1723632	1724599	12	136	61	0.419042	5.14758	1.61049	3.61873	1.94233	-	NN-NN
rbf-1	III	6703278	6703665	14	158	202	0.488883	5.98027	5.3331	3.61265	3.44741	+	gt-ag
mup-4	III	7483057	7483374	72	809	1817	2.51425	30.6205	47.9715	3.6063	4.25398	-	NN-NN
unc-30	IV	13119272	13120423	13	146	61	0.453962	5.52608	1.61049	3.60561	1.82686	+	gt-ag
lrch-1	X	6210431	6210822	27	303	282	0.942845	11.4685	7.44522	3.60451	2.98122	-	NN-NN
sdc-3	V	15045745	15046068	32	358	102	1.11745	13.5502	2.69295	3.60004	1.26898	-	NN-NN
sul-3	X	7828454	7829464	14	156	301	0.488883	5.90458	7.94685	3.59427	4.02282	-	NN-NN
ZK287.3	V	9678456	9678863	16	178	215	0.558723	6.73727	5.67632	3.59196	3.34475	+	gt-ag
pef-1	III	925144	926199	10	111	14	0.349202	4.20133	0.369621	3.58871	0.081985	-	NN-NN
C04E6.7	V	5893484	5893684	10	110	55	0.349202	4.16348	1.45208	3.57566	2.05599	+	gt-ag
Y105E8A.1	I	14342113	14342185	13	143	18	0.453962	5.41253	0.475227	3.57566	0.0660434	-	NN-NN
K11H3.8	III	9837566	9837905	15	165	51	0.523803	6.24522	1.34648	3.57566	1.36209	+	gt-ag
npr-25	V	11352322	11352845	16	176	98	0.558723	6.66157	2.58735	3.57566	2.21127	-	NN-NN
madd-4	I	8931232	8931386	20	220	163	0.698404	8.32697	4.30344	3.57566	2.62336	-	NN-NN
vab-3	X	10518009	10518518	25	274	211	0.873005	10.3709	5.57071	3.5704	2.6738	+	gt-ag
tba-8	X	9455740	9455892	16	175	300	0.558723	6.62372	7.92045	3.56744	3.82538	-	NN-NN
lrp-2	I	3943707	3943978	26	284	332	0.907925	10.7494	8.7653	3.56553	3.27116	-	NN-NN
xpf-1	II	11702824	11703565	12	131	282	0.419042	4.95833	7.44522	3.56469	4.15115	+	gt-ag
snf-12	X	9033030	9033511	10	109	130	0.349202	4.12563	3.43219	3.56248	3.297	+	gt-ag
Y35H6.3	X	29830	32451	16	174	33	0.558723	6.58587	0.871249	3.55917	0.640952	-	NN-NN
F02D8.4	V	14985019	14985307	47	511	573	1.64125	19.3413	15.1281	3.55882	3.20436	+	gt-ag
srap-1	II	11207091	11207472	36	391	732	1.25713	14.7993	19.3259	3.55733	3.94233	+	gt-ag
bed-1	V	19121191	19121803	20	217	161	0.698404	8.21342	4.25064	3.55585	2.60555	-	NN-NN
apb-3	I	7854955	7855406	18	195	95	0.628563	7.38072	2.50814	3.55363	1.99649	+	gt-ag
F47G9.4	V	11317989	11318096	16	173	49	0.558723	6.54802	1.29367	3.55085	1.21127	-	NN-NN
ncx-2	V	5307886	5308079	47	507	352	1.64125	19.1899	9.29333	3.54748	2.5014	+	gt-ag
nfm-1	III	6160446	6160793	16	172	120	0.558723	6.51017	3.16818	3.54249	2.50345	+	gt-ag
hid-1	X	2492528	2492839	15	160	463	0.523803	6.05597	12.2239	3.53126	4.54454	+	gt-ag
Y48B6A.13	II	14221644	14223531	10	106	203	0.349202	4.01208	5.3595	3.52222	3.93997	-	NN-NN
Y19D10A.11	V	2372548	2373279	20	211	41	0.698404	7.98632	1.08246	3.5154	0.632182	-	NN-NN
F56A4.12	V	2480509	2481240	20	211	41	0.698404	7.98632	1.08246	3.5154	0.632182	-	NN-NN
C14H10.2	X	10248713	10248835	17	179	119	0.593643	6.77512	3.14178	3.51258	2.40391	-	NN-NN
T28D6.5	III	11335666	11337438	10	105	96	0.349202	3.97423	2.53454	3.50854	2.85959	+	gt-ag
ZC239.22	II	3220053	3220244	18	189	36	0.628563	7.15362	0.950454	3.50854	0.596558	-	NN-NN
C46H3.2	X	1215392	1217948	22	230	248	0.768244	8.70546	6.54757	3.50228	3.09132	-	NN-NN
C16D9.1	V	8260512	8261052	66	688	1021	2.30473	26.0407	26.9559	3.4981	3.54793	+	gt-ag
nlr-1	IV	12174893	12175399	39	406	165	1.36189	15.367	4.35625	3.49616	1.67748	-	NN-NN
rom-4	IV	16999834	17002700	20	208	329	0.698404	7.87277	8.68609	3.49474	3.63657	+	gt-ag
trp-2	III	996999	997392	13	135	16	0.453962	5.10973	0.422424	3.4926	-0.103882	+	gt-ag
flp-13	IV	7697878	7698281	27	280	272	0.942845	10.598	7.18121	3.49062	2.92913	-	NN-NN
rsf-1	II	11307527	11308968	19	197	182	0.663484	7.45642	4.80507	3.49035	2.85643	+	gt-ag
F21D5.3	IV	8732042	8732184	12	124	83	0.419042	4.69338	2.19132	3.48546	2.38664	+	gt-ag
nol-9	IV	13425957	13426263	18	186	101	0.628563	7.04007	2.66655	3.48546	2.08484	+	gt-ag
pqn-63	V	9616093	9616168	13	134	251	0.453962	5.07188	6.62677	3.48188	3.86766	+	gt-ag
glr-5	V	8719857	8719931	17	175	44	0.593643	6.62372	1.16167	3.47997	0.968527	+	gt-ag
linc-29	IV	6354104	6354176	31	319	74	1.08253	12.0741	1.95371	3.47944	0.851815	+	gt-ag
glc-1	V	16220805	16221103	25	257	330	0.873005	9.72741	8.71249	3.47799	3.31902	+	gt-ag
mboa-7	X	10523865	10524116	29	298	183	1.01269	11.2793	4.83147	3.47741	2.25428	-	NN-NN
nhr-172	V	7509077	7509273	15	154	38	0.523803	5.82888	1.00326	3.47612	0.937595	+	gt-ag
unc-52	II	14648142	14648552	12	123	244	0.419042	4.65553	6.44196	3.47378	3.94233	-	NN-NN
R08B4.5	X	11116339	11116562	12	123	61	0.419042	4.65553	1.61049	3.47378	1.94233	-	NN-NN
vglu-3	III	10301850	10301953	17	174	79	0.593643	6.58587	2.08572	3.47171	1.81288	+	gt-ag
F14F9.4	V	5134572	5135112	10	102	76	0.349202	3.86068	2.00651	3.46672	2.52256	+	gt-ag
sms-3	III	1586070	1587809	10	102	19	0.349202	3.86068	0.501628	3.46672	0.522558	-	NN-NN
src-2	I	14325373	14327029	22	223	206	0.768244	8.44051	5.43871	3.45769	2.82363	+	gt-ag
F53B1.2	X	2110341	2110620	17	172	14	0.593643	6.51017	0.369621	3.45503	-0.68355	+	gt-ag
W05B2.7	III	10990062	10990731	19	192	572	0.663484	7.26717	15.1017	3.45326	4.5085	+	gt-ag
M116.5	IV	8419079	8419438	44	442	173	1.53649	16.7296	4.56746	3.4447	1.57175	-	NN-NN
sms-1	IV	11483414	11483962	34	341	383	1.18729	12.9068	10.1118	3.44239	3.0903	-	NN-NN
F47B7.7	X	3779936	3780153	42	421	303	1.46665	15.9348	7.99965	3.44158	2.44741	-	NN-NN
nas-9	V	4838425	4838587	14	140	255	0.488883	5.29898	6.73238	3.43815	3.78356	-	NN-NN
R102.6	IV	10699992	10700231	15	150	25	0.523803	5.67748	0.660037	3.43815	0.333524	-	NN-NN
D2023.1	V	11795775	11799846	32	319	119	1.11745	12.0741	3.14178	3.43364	1.49138	+	gt-ag
jip-1	II	1337672	1339686	21	209	153	0.733324	7.91062	4.03943	3.43127	2.46163	+	gt-ag
smut-1	V	6098581	6098664	50	497	133	1.74601	18.8114	3.5114	3.42947	1.00798	+	gt-ag
ZK1240.11	II	2325653	2325890	16	159	36	0.558723	6.01812	0.950454	3.42911	0.766483	+	gt-ag
glr-4	II	7785506	7786391	13	129	50	0.453962	4.88263	1.32007	3.42701	1.53997	-	NN-NN
Y53F4B.1	II	14955124	14955380	22	218	12	0.768244	8.25127	0.316818	3.42498	-1.27791	-	NN-NN
T06E4.10	V	9618845	9618973	75	743	1300	2.61901	28.1224	34.3219	3.42463	3.71204	-	NN-NN
tpa-1	IV	92077	92804	18	178	258	0.628563	6.73727	6.81158	3.42203	3.43786	+	gt-ag
pitp-1	III	3524035	3524693	21	207	174	0.733324	7.83492	4.59386	3.4174	2.64718	-	NN-NN
T19C9.8,Y61B8A.6	V	17239737	17239990	25	246	19	0.873005	9.31106	0.501628	3.41488	-0.799371	+	gt-ag
D1044.6	III	5537196	5537339	28	275	280	0.977765	10.4087	7.39242	3.41216	2.91849	-	NN-NN
T01H8.2	I	8572754	8573000	11	108	51	0.384122	4.08778	1.34648	3.41168	1.80955	-	NN-NN
E01G6.1	X	12262218	12262373	10	98	595	0.349202	3.70928	15.7089	3.40901	5.49138	+	gt-ag
C44C10.9	X	11713473	11713757	19	186	78	0.663484	7.04007	2.05932	3.40746	1.63403	-	NN-NN
Y50D4C.6	V	949148	949717	28	274	176	0.977765	10.3709	4.64666	3.4069	2.24863	-	NN-NN
C35A5.6	V	10509617	10510075	31	303	231	1.08253	11.4685	6.09874	3.4052	2.49411	+	gt-ag
hyls-1	V	7238085	7238279	25	244	79	0.873005	9.23536	2.08572	3.40311	1.25648	+	gt-ag
tag-77	IV	8504411	8504492	33	322	299	1.15237	12.1876	7.89405	3.40275	2.77617	-	NN-NN
sdc-3	V	15046208	15046386	15	146	179	0.523803	5.52608	4.72587	3.39916	3.17348	-	NN-NN
amx-2	I	12759839	12759960	48	467	778	1.67617	17.6759	20.5404	3.39854	3.61522	-	NN-NN
perm-5	IV	5697229	5698002	45	437	213	1.57141	16.5404	5.62352	3.39586	1.83941	-	NN-NN
F53E4.1	V	15654487	15655181	10	97	161	0.349202	3.67143	4.25064	3.39421	3.60555	-	NN-NN
har-2	I	9956671	9956957	10	97	17	0.349202	3.67143	0.448825	3.39421	0.362093	-	NN-NN
sup-10	X	17529384	17530157	30	291	222	1.04761	11.0143	5.86113	3.39421	2.48408	+	gt-ag
dop-6	X	4325129	4325530	15	145	128	0.523803	5.48823	3.37939	3.38924	2.68967	+	gt-ag
C24A8.6	X	4331879	4332280	15	145	128	0.523803	5.48823	3.37939	3.38924	2.68967	-	NN-NN
col-177	X	10999905	10999977	14	135	14	0.488883	5.10973	0.369621	3.38569	-0.403442	-	NN-NN
hsp-43	X	6233597	6234070	64	617	509	2.23489	23.3534	13.4384	3.38535	2.58808	-	NN-NN
irk-3	X	14354049	14354484	11	106	89	0.384122	4.01208	2.34973	3.38471	2.61286	-	NN-NN
Y64G10A.7	IV	14305487	14308068	16	154	69	0.558723	5.82888	1.8217	3.38301	1.70508	+	gt-ag
F28C10.3	X	532349	532926	21	202	142	0.733324	7.64567	3.74901	3.38212	2.35399	-	NN-NN
cls-3	III	9188195	9188283	22	211	58	0.768244	7.98632	1.53129	3.37789	0.995108	-	NN-NN
tag-80	IV	7589091	7589206	12	115	23	0.419042	4.35273	0.607234	3.37675	0.535158	+	gt-ag
tsen-54	IV	1948947	1949089	20	191	156	0.698404	7.22932	4.11863	3.37173	2.56003	+	gt-ag
sea-2	II	3970120	3970537	11	105	25	0.384122	3.97423	0.660037	3.37104	0.780983	+	gt-ag
nsun-5	II	14974924	14975702	39	372	241	1.36189	14.0801	6.36276	3.36998	2.22405	+	gt-ag
Y43F8C.6	V	19635397	19636110	15	143	116	0.523803	5.41253	3.06257	3.36921	2.54765	-	NN-NN
trp-2	III	1001724	1001814	17	162	125	0.593643	6.13167	3.30019	3.36861	2.47488	+	gt-ag
F46A8.11	I	11249102	11249645	10	95	19	0.349202	3.59573	0.501628	3.36415	0.522558	+	gt-ag
unc-52	II	14657097	14658475	28	266	131	0.977765	10.0681	3.4586	3.36415	1.82263	-	NN-NN
D1007.3	I	4575999	4576419	34	323	116	1.18729	12.2255	3.06257	3.36415	1.36708	-	NN-NN
nhr-18	V	2227762	2228085	16	152	186	0.558723	5.75318	4.91068	3.36415	3.13572	+	gt-ag
R03G8.3	X	13093390	13093549	39	369	158	1.36189	13.9666	4.17144	3.3583	1.61494	+	gt-ag
C39F7.1	V	1260569	1261820	11	104	103	0.384122	3.93638	2.71935	3.35723	2.82363	+	gt-ag
mup-4	III	7484962	7485067	47	443	1057	1.64125	16.7675	27.9064	3.3528	4.08773	-	NN-NN
acr-16	V	8563587	8563981	10	94	140	0.349202	3.55789	3.69621	3.34889	3.40391	+	gt-ag
aat-3	X	2554475	2555065	21	197	127	0.733324	7.45642	3.35299	3.34596	2.19293	+	gt-ag
Y55F3BR.1	IV	875572	876882	35	328	379	1.22221	12.4147	10.0062	3.34449	3.03333	+	gt-ag
set-16	III	13655410	13655912	14	131	42	0.488883	4.95833	1.10886	3.34229	1.18152	+	gt-ag
T10E9.3	I	6538429	6538940	20	187	626	0.698404	7.07792	16.5273	3.34119	4.56465	+	gt-ag
polq-1	III	5796758	5796892	15	140	154	0.523803	5.29898	4.06583	3.33862	2.95645	-	NN-NN
T20D4.5	V	3415149	3415230	25	233	168	0.873005	8.81901	4.43545	3.33656	2.34502	+	gt-ag
lin-15A	X	15733299	15733805	14	130	81	0.488883	4.92048	2.13852	3.33124	2.12905	+	gt-ag
lam-3	I	10613726	10613963	19	176	158	0.663484	6.66157	4.17144	3.32773	2.65241	+	gt-ag
hlh-33	III	1858440	1858570	12	111	367	0.419042	4.20133	9.68935	3.32568	4.53123	+	gt-ag
D2096.6	IV	8368976	8369063	211	1948	2981	7.36816	73.7315	78.7028	3.3229	3.41704	-	NN-NN
Y10G11A.1	IV	16425754	16427332	24	221	398	0.838084	8.36481	10.5078	3.31917	3.64822	+	gt-ag
wdr-20	V	10131212	10131344	40	367	323	1.39681	13.8909	8.52768	3.31393	2.61002	-	NN-NN
C25H3.10	II	5697722	5698861	23	211	234	0.803164	7.98632	6.17795	3.31376	2.94336	-	NN-NN
ccch-1	V	11528200	11536056	31	284	269	1.08253	10.7494	7.102	3.31178	2.71382	+	gt-ag
T07A9.12	IV	414590	415318	19	174	106	0.663484	6.58587	2.79856	3.31124	2.07655	+	gt-ag
feh-1	III	2555933	2556147	46	421	302	1.60633	15.9348	7.97325	3.31034	2.3114	+	gt-ag
C06A8.8	II	7767782	7769341	14	128	229	0.488883	4.84478	6.04594	3.30887	3.62841	-	NN-NN
C15H9.5	X	6095607	6095844	15	137	210	0.523803	5.18543	5.54431	3.30737	3.40391	+	gt-ag
acy-3	III	3777775	3778517	17	155	44	0.593643	5.86673	1.16167	3.30489	0.968527	-	NN-NN
rab-3	II	5722403	5722687	27	246	291	0.942845	9.31106	7.68283	3.30385	3.02655	-	NN-NN
ZK185.1	IV	4551237	4552020	10	91	70	0.349202	3.44434	1.8481	3.30209	2.40391	+	gt-ag
K02E10.6	X	2482440	2482613	31	282	234	1.08253	10.6737	6.17795	3.30158	2.51273	-	NN-NN
clec-4	II	12579396	12580414	19	172	115	0.663484	6.51017	3.03617	3.29456	2.19412	-	NN-NN
C15B12.1	X	6477718	6478152	19	172	91	0.663484	6.51017	2.40254	3.29456	1.85643	+	gt-ag
seu-1	IV	6330012	6330384	12	108	28	0.419042	4.08778	0.739242	3.28615	0.818951	+	gt-ag
atg-4.2	IV	11670947	11671234	18	162	271	0.628563	6.13167	7.1548	3.28615	3.50878	+	gt-ag
oac-59	IV	12300426	12300517	49	440	589	1.71109	16.6539	15.5505	3.28288	3.18397	-	NN-NN
M116.5	IV	8420085	8420226	30	269	334	1.04761	10.1816	8.8181	3.2808	3.07337	-	NN-NN
C01G10.5	V	15089266	15089437	53	474	513	1.85077	17.9408	13.544	3.27705	2.87145	-	NN-NN
tbc-18	X	8378788	8378917	14	125	80	0.488883	4.73123	2.11212	3.27466	2.11113	+	gt-ag
C01C4.3	X	3712389	3712806	26	232	164	0.907925	8.78116	4.32984	3.27377	2.25367	+	gt-ag
egl-4	IV	1873455	1873585	12	107	103	0.419042	4.04993	2.71935	3.27273	2.6981	+	gt-ag
Y95D11A.3	I	10941810	10942602	22	196	163	0.768244	7.41857	4.30344	3.2715	2.48585	+	gt-ag
R03H10.7	II	4178039	4178294	10	89	80	0.349202	3.36864	2.11212	3.27003	2.59656	-	NN-NN
memb-1	X	9440854	9441140	31	275	327	1.08253	10.4087	8.63329	3.26532	2.99551	-	NN-NN
F56D5.3	IV	9399943	9400045	22	195	104	0.768244	7.38072	2.74576	3.26412	1.83757	+	gt-ag
attf-6	I	12796945	12798038	17	150	224	0.593643	5.67748	5.91393	3.25758	3.31645	-	NN-NN
eff-1	II	8346850	8346979	17	150	139	0.593643	5.67748	3.66981	3.25758	2.62804	+	gt-ag
adt-1	X	12684742	12684829	26	229	348	0.907925	8.66761	9.18772	3.25499	3.33906	+	gt-ag
sup-10	X	17528512	17529278	25	220	50	0.873005	8.32697	1.32007	3.25373	0.596558	+	gt-ag
Y68A4A.13	V	17207674	17208035	60	527	124	2.09521	19.9469	3.27378	3.25099	0.643864	-	NN-NN
K08B5.1	X	16561497	16562070	13	114	96	0.453962	4.31488	2.53454	3.24868	2.48108	+	gt-ag
C28G1.10	X	8847393	8847632	30	262	186	1.04761	9.91666	4.91068	3.24276	2.22883	+	gt-ag
pgs-1	I	52572	53266	14	122	142	0.488883	4.61768	3.74901	3.23961	2.93895	+	gt-ag
pqbp-1.2	IV	384371	384536	14	122	84	0.488883	4.61768	2.21773	3.23961	2.18152	-	NN-NN
glb-11	III	3990826	3992086	21	183	356	0.733324	6.92652	9.39893	3.23961	3.67997	-	NN-NN
sop-3	I	2762392	2763442	23	200	153	0.803164	7.56997	4.03943	3.23652	2.33038	-	NN-NN
ubc-17	X	7053991	7054178	16	139	52	0.558723	5.26113	1.37288	3.23517	1.297	+	gt-ag
lips-7	II	554303	554419	15	130	193	0.523803	4.92048	5.09549	3.2317	3.28212	+	gt-ag
Y62E10A.13	IV	13392601	13396682	15	130	94	0.523803	4.92048	2.48174	3.2317	2.24426	-	NN-NN
ugt-20	IV	6082968	6083449	42	363	176	1.46665	13.7395	4.64666	3.22773	1.66367	-	NN-NN
ZK355.2	II	2924683	2925432	11	95	16	0.384122	3.59573	0.422424	3.22665	0.137127	+	gt-ag
ugt-29	V	697681	698026	49	421	372	1.71109	15.9348	9.82135	3.21919	2.52101	-	NN-NN
hlh-2	I	7193412	7193763	36	309	329	1.25713	11.6956	8.68609	3.21776	2.78858	-	NN-NN
rom-2	III	9593322	9594229	16	137	42	0.558723	5.18543	1.10886	3.21426	0.988876	-	NN-NN
xpc-1	IV	2006634	2007629	25	214	269	0.873005	8.09987	7.102	3.21384	3.02416	+	gt-ag
K06A9.1	X	1559195	1559477	18	154	103	0.628563	5.82888	2.71935	3.21309	2.11313	+	gt-ag
Y51F10.2	I	1978130	1978520	15	128	51	0.523803	4.84478	1.34648	3.20934	1.36209	+	gt-ag
atm-1	I	201693	202124	19	162	113	0.663484	6.13167	2.98337	3.20815	2.16881	+	gt-ag
M04C3.5	V	19449837	19450563	19	162	60	0.663484	6.13167	1.58409	3.20815	1.25552	+	gt-ag
unc-52	II	14655548	14656090	10	85	72	0.349202	3.21724	1.90091	3.20369	2.44456	-	NN-NN
sul-3	X	7830145	7831037	16	136	143	0.558723	5.14758	3.77541	3.20369	2.75643	-	NN-NN
C01G10.6	V	15087747	15088034	93	790	750	3.24758	29.9014	19.8011	3.20278	2.60815	+	gt-ag
pros-1	III	8069354	8069516	21	178	120	0.733324	6.73727	3.16818	3.19964	2.11113	+	gt-ag
Y59E9AL.4	IV	5213330	5213947	34	288	294	1.18729	10.9008	7.76204	3.19869	2.70877	-	NN-NN
mpk-2	II	5105109	5105411	17	144	98	0.593643	5.45038	2.58735	3.19869	2.12381	+	gt-ag
M117.4	IV	11832811	11833009	24	203	90	0.838084	7.68352	2.37613	3.1966	1.50345	-	NN-NN
T19A6.4	I	8402875	8403228	11	93	138	0.384122	3.52004	3.64341	3.19595	3.24565	+	gt-ag
mbk-2	IV	13027303	13031594	14	118	128	0.488883	4.46628	3.37939	3.19151	2.7892	+	gt-ag
ceh-38	II	6953059	6953209	28	236	220	0.977765	8.93256	5.80833	3.19151	2.57056	+	gt-ag
gst-9	II	4891720	4892998	19	160	58	0.663484	6.05597	1.53129	3.19023	1.20661	+	gt-ag
F41E6.7	V	8598468	8599225	12	101	40	0.419042	3.82283	1.05606	3.18947	1.33352	-	NN-NN
fbxc-50	II	3246589	3247208	17	143	31	0.593643	5.41253	0.818446	3.18863	0.463292	-	NN-NN
drag-1	I	1680558	1681628	10	84	32	0.349202	3.17939	0.844848	3.18662	1.27463	+	gt-ag
ekl-4	I	14470946	14473258	20	168	107	0.698404	6.35877	2.82496	3.18662	2.0161	+	gt-ag
K09F5.6	X	7723305	7723672	21	176	79	0.733324	6.66157	2.08572	3.18334	1.50802	+	gt-ag
ZK1053.2	I	13233590	13234147	16	134	119	0.558723	5.07188	3.14178	3.18232	2.49138	+	gt-ag
W03F8.6	IV	5186204	5186418	68	568	658	2.37457	21.4987	17.3722	3.17851	2.87104	-	NN-NN
T01H10.8	X	12132605	12132756	34	284	24	1.18729	10.7494	0.633636	3.17851	-0.905942	-	NN-NN
F40H3.1	II	6183915	6184110	20	167	192	0.698404	6.32092	5.06909	3.178	2.85959	+	gt-ag
2RSSE.1	II	15270031	15270796	59	491	296	2.06029	18.5843	7.81484	3.17316	1.92337	+	gt-ag
F44E2.7	III	8847409	8847533	13	108	23	0.453962	4.08778	0.607234	3.17067	0.41968	-	NN-NN
bcl-11	V	6358605	6358736	59	490	707	2.06029	18.5464	18.6659	3.17022	3.17948	+	gt-ag
Y6G8.2	V	17598660	17598872	10	83	17	0.349202	3.14154	0.448825	3.16934	0.362093	-	NN-NN
F58G11.4	V	13675394	13675771	14	116	60	0.488883	4.39058	1.58409	3.16685	1.69609	+	gt-ag
twk-43	V	13351862	13352224	11	91	172	0.384122	3.44434	4.54106	3.16459	3.56339	+	gt-ag
F45E4.5	IV	7628566	7628769	37	306	488	1.29205	11.5821	12.8839	3.16416	3.31784	-	NN-NN
M116.5	IV	8417798	8417881	45	372	136	1.57141	14.0801	3.5906	3.16353	1.19217	-	NN-NN
Y70G10A.3	III	10243459	10243572	42	346	210	1.46665	13.096	5.54431	3.15854	1.91849	+	gt-ag
F13H8.5	II	6254246	6254994	15	123	177	0.523803	4.65553	4.67306	3.15185	3.15727	-	NN-NN
ZK1193.2	X	412328	412438	15	123	142	0.523803	4.65553	3.74901	3.15185	2.83941	-	NN-NN
rad-54	I	9066628	9066702	15	123	28	0.523803	4.65553	0.739242	3.15185	0.497022	+	gt-ag
twk-8	IV	9086668	9087321	26	213	383	0.907925	8.06202	10.1118	3.1505	3.47732	+	gt-ag
F36H1.3	IV	11050698	11050923	16	131	22	0.558723	4.95833	0.580833	3.14965	0.0559898	+	gt-ag
F14D12.1	X	5608125	5608309	11	90	159	0.384122	3.40649	4.19784	3.14865	3.45001	+	gt-ag
unc-13	I	7431104	7433090	23	188	284	0.803164	7.11577	7.49802	3.14725	3.22274	+	gt-ag
F48G7.5	V	622604	622749	83	678	784	2.89838	25.6622	20.6988	3.14633	2.83623	-	NN-NN
VC5.2	V	7087866	7088205	24	196	125	0.838084	7.41857	3.30019	3.14597	1.97738	+	gt-ag
fbxa-11	III	950952	951195	20	163	131	0.698404	6.16952	3.4586	3.14303	2.30805	+	gt-ag
ncam-1	X	697219	697319	21	171	161	0.733324	6.47232	4.25064	3.14176	2.53516	+	gt-ag
fbxa-210	V	18125382	18125709	15	122	106	0.523803	4.61768	2.79856	3.14007	2.41759	+	gt-ag
Y37E11AL.6	IV	3661906	3662041	39	317	96	1.36189	11.9984	2.53454	3.13916	0.896118	-	NN-NN
myo-5	V	8111281	8111558	25	203	399	0.873005	7.68352	10.5342	3.13771	3.59295	+	gt-ag
ncx-3	IV	10720455	10720998	11	89	110	0.384122	3.36864	2.90416	3.13253	2.91849	+	gt-ag
col-115	IV	7990147	7990257	35	282	315	1.22221	10.6737	8.31647	3.12649	2.76648	+	gt-ag
M01E11.3	I	5575403	5575477	18	145	324	0.628563	5.48823	8.55408	3.12621	3.76648	+	gt-ag
klp-3	II	7843941	7844034	22	177	266	0.768244	6.69942	7.0228	3.1244	3.19241	+	gt-ag
C55B6.1	X	7200651	7201278	23	185	62	0.803164	7.00222	1.63689	3.12405	1.02719	+	gt-ag
oac-59	IV	12298193	12298650	31	249	178	1.08253	9.42461	4.69947	3.12203	2.1181	-	NN-NN
K10H10.4	II	14500549	14500778	54	433	170	1.88569	16.389	4.48825	3.11956	1.25106	+	gt-ag
F40G9.5	III	183873	184385	10	80	181	0.349202	3.02799	4.77867	3.11623	3.77448	+	gt-ag
mys-2	I	14125145	14126339	12	96	84	0.419042	3.63358	2.21773	3.11623	2.40391	+	gt-ag
T03F6.4	III	13387490	13387561	13	104	65	0.453962	3.93638	1.7161	3.11623	1.91849	+	gt-ag
dhhc-2	I	11845776	11847044	14	112	70	0.488883	4.23918	1.8481	3.11623	1.91849	+	gt-ag
pix-1	X	13729030	13729119	14	112	59	0.488883	4.23918	1.55769	3.11623	1.67185	+	gt-ag
T13G4.4	X	1190009	1190215	17	136	189	0.593643	5.14758	4.98988	3.11623	3.07134	-	NN-NN
C34B4.3	V	13067001	13067119	42	336	128	1.46665	12.7175	3.37939	3.11623	1.20424	-	NN-NN
F54A3.2	II	2243771	2245124	64	510	556	2.23489	19.3034	14.6792	3.11058	2.7155	+	gt-ag
plc-1	X	10809523	10809644	27	215	369	0.942845	8.13772	9.74215	3.10953	3.36915	-	NN-NN
F40A3.4	V	7875918	7876440	50	398	256	1.74601	15.0642	6.75878	3.10899	1.9527	+	gt-ag
unc-2	X	2715179	2716008	25	199	129	0.873005	7.53212	3.40579	3.10899	1.96393	-	NN-NN
F27D9.7	X	7666647	7666723	16	127	98	0.558723	4.80693	2.58735	3.10491	2.21127	-	NN-NN
T26C11.4	X	1842400	1843013	32	254	145	1.11745	9.61386	3.82822	3.10491	1.77647	-	NN-NN
T05F1.11	I	9654013	9654486	14	111	47	0.488883	4.20133	1.24087	3.10329	1.34379	+	gt-ag
Y53G8AR.7	III	3283277	3283942	26	206	141	0.907925	7.79707	3.72261	3.10229	2.03567	+	gt-ag
T22B2.6	X	3915403	3915784	12	95	204	0.419042	3.59573	5.3859	3.10112	3.68402	-	NN-NN
mcm-10	III	11319773	11320211	12	95	26	0.419042	3.59573	0.686439	3.10112	0.712035	+	gt-ag
T22C8.6	II	8628834	8628918	36	285	136	1.25713	10.7872	3.5906	3.10112	1.5141	-	NN-NN
dys-1	I	11545107	11545430	33	261	412	1.15237	9.87881	10.8774	3.09974	3.23866	-	NN-NN
ser-4	III	1728095	1729137	19	150	59	0.663484	5.67748	1.55769	3.09712	1.23127	-	NN-NN
pepm-1	V	14329376	14329549	16	126	12	0.558723	4.76908	0.316818	3.09351	-0.818479	+	gt-ag
C02B8.6	X	8134371	8134715	46	362	125	1.60633	13.7016	3.30019	3.09251	1.03878	-	NN-NN
tmc-1	X	1169283	1169382	46	362	94	1.60633	13.7016	2.48174	3.09251	0.627585	+	gt-ag
W01A8.6	I	7072743	7074660	15	118	209	0.523803	4.46628	5.51791	3.09198	3.39703	-	NN-NN
F46C5.4	II	8838780	8839123	30	236	127	1.04761	8.93256	3.35299	3.09198	1.67835	+	gt-ag
nas-7	II	7401221	7401515	50	392	887	1.74601	14.8371	23.4181	3.08708	3.74549	-	NN-NN
K12C11.3	I	1336299	1336688	43	337	266	1.50157	12.7554	7.0228	3.08657	2.22558	+	gt-ag
C14C11.4	V	5649979	5650588	18	141	147	0.628563	5.33683	3.88102	3.08585	2.62631	+	gt-ag
T04F8.7	X	11680213	11680577	47	368	434	1.64125	13.9287	11.4582	3.0852	2.80352	-	NN-NN
cpr-8	V	1136932	1139041	23	180	133	0.803164	6.81297	3.5114	3.08452	2.12828	+	gt-ag
sos-1	V	4536326	4537162	33	258	111	1.15237	9.76526	2.93057	3.08306	1.34658	-	NN-NN
tyr-6	IV	6484177	6484306	27	211	183	0.942845	7.98632	4.83147	3.08244	2.35737	+	gt-ag
Y76B12C.9	IV	2035382	2035732	10	78	27	0.349202	2.95229	0.71284	3.0797	1.02952	-	NN-NN
Y46H3D.1	V	1642594	1642881	20	156	185	0.698404	5.90458	4.88428	3.0797	2.80601	+	gt-ag
spin-3	X	13131861	13132336	29	226	73	1.01269	8.55406	1.92731	3.07842	0.928402	+	gt-ag
Y56A3A.28	III	11963743	11969021	24	187	43	0.838084	7.07792	1.13526	3.07816	0.43786	-	NN-NN
C47G2.4	II	11292084	11292230	14	109	110	0.488883	4.12563	2.90416	3.07706	2.57056	-	NN-NN
fbxa-182	II	2411972	2412322	14	109	67	0.488883	4.12563	1.7689	3.07706	1.85529	-	NN-NN
vab-3	X	10517701	10517840	32	249	97	1.11745	9.42461	2.56094	3.07623	1.19647	+	gt-ag
vglu-3	III	10300741	10301296	18	140	55	0.628563	5.29898	1.45208	3.07558	1.20799	+	gt-ag
ncr-1	X	4476834	4477024	22	171	106	0.768244	6.47232	2.79856	3.07465	1.86505	-	NN-NN
cam-1	II	9304822	9310225	44	342	336	1.53649	12.9446	8.8709	3.07465	2.52944	-	NN-NN
C01F1.6	II	4284026	4285199	16	124	107	0.558723	4.69338	2.82496	3.07042	2.33803	-	NN-NN
T04F8.7	X	11677691	11677764	23	178	176	0.803164	6.73727	4.64666	3.0684	2.53243	-	NN-NN
taf-3	X	16344546	16345434	39	301	77	1.36189	11.3928	2.03291	3.06444	0.577942	+	gt-ag
R10E11.5	III	9788352	9788770	20	154	91	0.698404	5.82888	2.40254	3.06108	1.78242	-	NN-NN
ttr-43	V	12590193	12590568	20	154	17	0.698404	5.82888	0.448825	3.06108	-0.637907	-	NN-NN
daao-1	IV	2614285	2614375	13	100	12	0.453962	3.78498	0.316818	3.05964	-0.518919	+	gt-ag
bet-2	X	10570372	10571865	19	146	249	0.663484	5.52608	6.57397	3.05812	3.30863	+	gt-ag
F21C10.3	V	9130189	9130366	59	452	327	2.06029	17.1081	8.63329	3.05376	2.06706	+	gt-ag
C31H5.6	I	9044185	9044599	39	298	315	1.36189	11.2793	8.31647	3.04999	2.61036	-	NN-NN
bcl-11	V	6358837	6359145	66	503	515	2.30473	19.0385	13.5968	3.04625	2.56059	+	gt-ag
nlp-21	III	11388785	11389395	21	160	96	0.733324	6.05597	2.53454	3.04584	1.7892	-	NN-NN
T22E5.1	X	6413029	6413282	22	167	221	0.768244	6.32092	5.83473	3.0405	2.92503	+	gt-ag
par-2	III	1083131	1084062	14	106	103	0.488883	4.01208	2.71935	3.03679	2.4757	+	gt-ag
feh-1	III	2556524	2556608	57	431	485	1.99045	16.3133	12.8047	3.03488	2.68551	+	gt-ag
T27C4.1	V	3714385	3714792	38	287	238	1.32697	10.8629	6.28355	3.03321	2.24345	-	NN-NN
Y54G11A.1	II	14265108	14265969	20	151	67	0.698404	5.71533	1.7689	3.0327	1.34072	-	NN-NN
Y57A10A.1	II	12141966	12143412	13	98	151	0.453962	3.70928	3.98663	3.0305	3.13452	+	gt-ag
F19C6.5	X	9983231	9983910	13	98	108	0.453962	3.70928	2.85136	3.0305	2.65101	-	NN-NN
mlh-1	III	13510551	13511065	13	98	104	0.453962	3.70928	2.74576	3.0305	2.59656	-	NN-NN
B0024.4	V	10298091	10298173	17	128	219	0.593643	4.84478	5.78193	3.02876	3.28388	+	gt-ag
tps-1	X	17472568	17473107	38	286	203	1.32697	10.8251	5.3595	3.02817	2.01397	-	NN-NN
F53A3.1	III	1941753	1943465	19	143	41	0.663484	5.41253	1.08246	3.02817	0.706183	-	NN-NN
W03A5.1	III	5412762	5412907	23	173	185	0.803164	6.54802	4.88428	3.02729	2.60438	+	gt-ag
lips-17	II	7609888	7610038	10	75	165	0.349202	2.83874	4.35625	3.02312	3.64095	+	gt-ag
tag-140	V	11463499	11464269	20	150	15	0.698404	5.67748	0.396022	3.02312	-0.818479	+	gt-ag
sydn-1	I	2379705	2381013	31	232	47	1.08253	8.78116	1.24087	3.02001	0.196951	-	NN-NN
ins-33	I	13638065	13639012	29	217	283	1.01269	8.21342	7.47162	3.0198	2.88324	-	NN-NN
tpa-1	IV	105135	105652	79	590	596	2.75869	22.3314	15.7353	3.01702	2.51195	+	gt-ag
M03C11.6	III	10423420	10423839	13	97	15	0.453962	3.67143	0.396022	3.0157	-0.196991	-	NN-NN
nol-9	IV	13428483	13429160	22	164	195	0.768244	6.20737	5.14829	3.01435	2.74446	+	gt-ag
Y116A8C.9	IV	16945030	16946316	60	447	440	2.09521	16.9189	11.6167	3.01347	2.47103	-	NN-NN
F36H9.4	V	1778971	1779118	43	320	262	1.50157	12.1119	6.91719	3.01189	2.20372	-	NN-NN
lpd-3	I	3591361	3592122	23	171	171	0.803164	6.47232	4.51466	3.01052	2.49085	-	NN-NN
lin-41	I	9340469	9340857	58	431	620	2.02537	16.3133	16.3689	3.00979	3.0147	-	NN-NN
pxn-2	X	10973403	10974671	14	104	171	0.488883	3.93638	4.51466	3.00931	3.20706	-	NN-NN
lact-3	II	10654689	10655256	27	200	224	0.942845	7.56997	5.91393	3.00519	2.64903	-	NN-NN
lec-2	II	10011333	10012980	95	700	1083	3.31742	26.4949	28.5928	2.99758	3.10752	-	NN-NN
glr-5	V	8720024	8720102	19	140	67	0.663484	5.29898	1.7689	2.99758	1.41472	+	gt-ag
myo-6	III	13412500	13412617	11	81	74	0.384122	3.06584	1.95371	2.99664	2.34658	+	gt-ag
2RSSE.1	II	15274516	15275029	32	235	187	1.11745	8.89471	4.93708	2.99274	2.14345	+	gt-ag
nca-2	III	4971627	4971704	12	88	76	0.419042	3.33079	2.00651	2.9907	2.25952	+	gt-ag
R17.3	III	10838178	10838891	12	88	34	0.419042	3.33079	0.897651	2.9907	1.09906	+	gt-ag
Y18H1A.9	I	748592	749898	13	95	248	0.453962	3.59573	6.54757	2.98564	3.85031	-	NN-NN
mctp-1	I	6634318	6637210	13	95	80	0.453962	3.59573	2.11212	2.98564	2.21805	-	NN-NN
tag-273	IV	14504036	14505032	27	197	453	0.942845	7.45642	11.9599	2.98339	3.66504	-	NN-NN
C46H3.2	X	1214929	1215274	28	204	446	0.977765	7.72137	11.7751	2.9813	3.5901	-	NN-NN
let-363	I	5252949	5253195	14	102	94	0.488883	3.86068	2.48174	2.9813	2.34379	+	gt-ag
unc-16	III	9549682	9550137	32	233	143	1.11745	8.81901	3.77541	2.98041	1.75643	+	gt-ag
Y11D7A.3	IV	9238426	9239105	86	625	255	3.00314	23.6562	6.73238	2.97767	1.16465	+	gt-ag
Y57G11C.42	IV	14734527	14734926	68	494	560	2.37457	18.6978	14.7848	2.97713	2.63838	+	gt-ag
C30F2.3	X	16082474	16083312	23	167	251	0.803164	6.32092	6.62677	2.97637	3.04454	+	gt-ag
lgc-44	V	11669823	11669965	26	188	82	0.907925	7.11577	2.16492	2.97038	1.25367	-	NN-NN
plc-1	X	10799697	10800071	36	260	155	1.25713	9.84096	4.09223	2.96867	1.70276	-	NN-NN
unc-6	X	6890004	6890458	32	231	227	1.11745	8.74331	5.99314	2.96798	2.42311	+	gt-ag
tyr-2	III	13744466	13744561	151	1084	2362	5.27295	41.0292	62.3603	2.95997	3.56395	+	gt-ag
Y7A9A.1	IV	16198998	16199394	17	122	68	0.593643	4.61768	1.7953	2.9595	1.59656	+	gt-ag
F18E9.3	X	8589594	8589726	138	990	1354	4.81899	37.4713	35.7476	2.95899	2.89105	+	gt-ag
Y73B3A.3	X	92345	93471	23	165	74	0.803164	6.24522	1.95371	2.95899	1.28245	-	NN-NN
coel-1	X	4269146	4270101	12	86	69	0.419042	3.25509	1.8217	2.95753	2.12012	+	gt-ag
ZK688.9	III	7881603	7882185	28	200	114	0.977765	7.56997	3.00977	2.95273	1.62209	-	NN-NN
tbc-12	X	2526882	2527247	29	207	243	1.01269	7.83492	6.41556	2.95173	2.66339	-	NN-NN
ZK858.5	I	9136383	9136622	16	114	116	0.558723	4.31488	3.06257	2.94912	2.45454	-	NN-NN
F43D9.1	III	10493987	10494702	25	178	153	0.873005	6.73727	4.03943	2.9481	2.21009	+	gt-ag
lev-10	I	14397942	14398318	34	242	201	1.18729	9.15966	5.3067	2.94763	2.16015	+	gt-ag
cbs-1	X	10056796	10056889	34	242	146	1.18729	9.15966	3.85462	2.94763	1.69892	+	gt-ag
C17G1.5	X	9941861	9942496	65	462	374	2.26981	17.4866	9.87416	2.94561	2.12108	+	gt-ag
ZC262.9	III	8338213	8338461	105	746	726	3.66662	28.236	19.1675	2.94501	2.38614	-	NN-NN
ZC262.10	III	8346408	8346656	105	746	726	3.66662	28.236	19.1675	2.94501	2.38614	-	NN-NN
tbc-8	III	10365896	10366449	11	78	39	0.384122	2.95229	1.02966	2.9422	1.42253	+	gt-ag
sld-5	V	20235500	20236292	33	234	262	1.15237	8.85686	6.91719	2.9422	2.58559	-	NN-NN
zyg-12	II	4952392	4952647	24	170	71	0.838084	6.43447	1.87451	2.94065	1.16134	+	gt-ag
ZC247.2	I	10256152	10256458	15	106	196	0.523803	4.01208	5.17469	2.93726	3.30438	-	NN-NN
aat-2	V	9245315	9245443	95	669	358	3.31742	25.3215	9.45173	2.93223	1.51052	-	NN-NN
K02E10.5	X	2478519	2478628	25	176	33	0.873005	6.66157	0.871249	2.9318	-0.00290392	-	NN-NN
par-3	III	5670534	5670732	31	218	348	1.08253	8.25127	9.18772	2.93021	3.08531	+	gt-ag
spr-5	I	13445274	13446811	64	450	285	2.23489	17.0324	7.52443	2.93001	1.75138	+	gt-ag
ZK822.6	IV	11924992	11925145	15	105	43	0.523803	3.97423	1.13526	2.92358	1.11593	-	NN-NN
toh-1	III	3808055	3808850	96	672	1231	3.35234	25.4351	32.5002	2.92358	3.27721	-	NN-NN
rga-5	IV	13830173	13830724	18	126	51	0.628563	4.76908	1.34648	2.92358	1.09906	+	gt-ag
Y51A2D.7	V	18534390	18534476	26	182	216	0.907925	6.88867	5.70272	2.92358	2.65101	+	gt-ag
K08D10.14	IV	4156713	4156896	40	279	254	1.39681	10.5601	6.70598	2.91842	2.26331	+	gt-ag
Y42A5A.1	V	11097196	11097460	36	250	45	1.25713	9.46246	1.18807	2.91209	-0.0815138	+	gt-ag
rsp-1	II	11454513	11454642	27	187	191	0.942845	7.07792	5.04268	2.90823	2.4191	+	gt-ag
daf-38	IV	15820235	15822697	13	90	36	0.453962	3.40649	0.950454	2.90764	1.06604	+	gt-ag
lin-38	II	13581064	13581532	35	242	193	1.22221	9.15966	5.09549	2.90581	2.05973	+	gt-ag
nhr-96	V	2234308	2234529	20	138	93	0.698404	5.22328	2.45534	2.90282	1.81379	+	gt-ag
Y69A2AR.14	IV	2555597	2555708	27	186	33	0.942845	7.04007	0.871249	2.9005	-0.113935	+	gt-ag
twk-43	V	13352426	13352728	17	117	37	0.593643	4.42843	0.976855	2.89913	0.718549	+	gt-ag
oac-9	I	6266738	6266864	16	110	58	0.558723	4.16348	1.53129	2.89759	1.45454	-	NN-NN
C44H9.5	V	12848201	12848277	16	110	44	0.558723	4.16348	1.16167	2.89759	1.05599	-	NN-NN
Y92H12BR.7	I	1397707	1399168	37	254	183	1.29205	9.61386	4.83147	2.89546	1.9028	+	gt-ag
unc-77	IV	6166927	6167122	22	151	78	0.768244	5.71533	2.05932	2.8952	1.42253	-	NN-NN
unc-70	V	6889464	6889599	38	260	144	1.32697	9.84096	3.80181	2.89067	1.51856	+	gt-ag
ZK836.3	V	12195371	12195637	19	130	23	0.663484	4.92048	0.607234	2.89067	-0.127807	-	NN-NN
lon-2	X	4739476	4740411	43	294	201	1.50157	11.1279	5.3067	2.88963	1.82135	-	NN-NN
W08E12.2	IV	3306183	3306465	134	916	1149	4.67931	34.6705	30.3353	2.88934	2.69663	+	gt-ag
T03F7.7	V	11311589	11311859	140	957	1460	4.88883	36.2223	38.5462	2.88932	2.97903	+	gt-ag
C34B4.3	V	13067193	13067459	34	232	140	1.18729	8.78116	3.69621	2.88674	1.63838	-	NN-NN
Y37E11AL.6	IV	3662162	3662235	16	109	39	0.558723	4.12563	1.02966	2.88441	0.88196	-	NN-NN
C33A12.19	IV	9517249	9517611	42	286	349	1.46665	10.8251	9.21412	2.88378	2.65132	+	gt-ag
bli-3	I	149817	150391	26	177	113	0.907925	6.69942	2.98337	2.88339	1.7163	-	NN-NN
F11F1.1	III	13395811	13396085	41	279	238	1.43173	10.5601	6.28355	2.8828	2.13382	+	gt-ag
C44B11.1	III	3155384	3155932	10	68	16	0.349202	2.57379	0.422424	2.88176	0.27463	+	gt-ag
ccpp-1	I	5756214	5756542	25	170	105	0.873005	6.43447	2.77216	2.88176	1.66695	-	NN-NN
T28C12.4	V	6325245	6325318	217	1474	654	7.57768	55.7907	17.2666	2.8802	1.18815	+	gt-ag
F23C8.13	I	2417574	2418371	23	156	169	0.803164	5.90458	4.46185	2.87807	2.47388	+	gt-ag
gbb-2	IV	4505530	4506529	22	149	111	0.768244	5.63963	2.93057	2.87596	1.93154	-	NN-NN
C35B1.2	IV	4089288	4090029	29	196	254	1.01269	7.41857	6.70598	2.87295	2.72726	+	gt-ag
rin-1	V	14811510	14813179	16	108	127	0.558723	4.08778	3.35299	2.87111	2.58524	-	NN-NN
ZC455.1	V	12775503	12776065	24	162	243	0.838084	6.13167	6.41556	2.87111	2.93641	+	gt-ag
T04F8.7	X	11679661	11680072	63	425	255	2.19997	16.0862	6.73238	2.87027	1.61363	-	NN-NN
ptr-12	I	2591144	2591887	23	155	121	0.803164	5.86673	3.19458	2.86879	1.99186	-	NN-NN
sulp-2	X	5598688	5599062	37	249	227	1.29205	9.42461	5.99314	2.86677	2.21365	-	NN-NN
hmg-1.2	III	6280677	6280982	32	215	82	1.11745	8.13772	2.16492	2.86442	0.95411	+	gt-ag
olrn-1	X	15543104	15543198	17	114	231	0.593643	4.31488	6.09874	2.86165	3.36084	+	gt-ag
F27D4.6	I	7731227	7732073	20	134	48	0.698404	5.07188	1.26727	2.86039	0.859593	+	gt-ag
acr-8	X	10415089	10415289	60	402	190	2.09521	15.2156	5.01628	2.86039	1.25952	+	gt-ag
lgc-47	X	9804066	9804500	23	154	202	0.803164	5.82888	5.3331	2.85945	2.73121	-	NN-NN
Y102A11A.6	X	2032496	2032806	13	87	48	0.453962	3.29294	1.26727	2.85873	1.48108	-	NN-NN
feh-1	III	2555343	2555877	82	548	479	2.86346	20.7417	12.6463	2.85671	2.14289	+	gt-ag
lips-3	III	4618123	4618449	15	100	498	0.523803	3.78498	13.1479	2.85319	4.64967	+	gt-ag
F41G4.8	X	16844147	16844224	36	240	245	1.25713	9.08396	6.46837	2.85319	2.36327	-	NN-NN
lsy-2	X	2089826	2090005	47	313	167	1.64125	11.847	4.40905	2.85166	1.42567	+	gt-ag
flr-4	X	15092815	15093189	17	113	97	0.593643	4.27703	2.56094	2.84894	2.10901	+	gt-ag
R07B7.6	V	12073690	12073861	14	93	74	0.488883	3.52004	1.95371	2.84803	1.99866	-	NN-NN
kcc-3	II	7428453	7428696	11	73	156	0.384122	2.76304	4.11863	2.84662	3.42253	-	NN-NN
F54G2.1	X	2629673	2650067	11	73	112	0.384122	2.76304	2.95697	2.84662	2.94448	-	NN-NN
R02D5.7	V	14480499	14480576	11	73	66	0.384122	2.76304	1.7425	2.84662	2.18152	-	NN-NN
nhr-78	IV	4274503	4275254	19	126	33	0.663484	4.76908	0.871249	2.84558	0.393025	-	NN-NN
T10B11.6	I	6943724	6944373	65	431	382	2.26981	16.3133	10.0854	2.8454	2.15162	-	NN-NN
ZK632.5	III	9808987	9809096	24	159	198	0.838084	6.01812	5.2275	2.84415	2.64095	+	gt-ag
icmt-1	I	4902540	4902641	24	159	19	0.838084	6.01812	0.501628	2.84415	-0.740477	+	gt-ag
ceh-43	III	4447016	4447362	10	66	109	0.349202	2.49809	2.87776	2.83869	3.04281	-	NN-NN
hst-2	X	11206545	11206637	20	132	84	0.698404	4.99618	2.21773	2.83869	1.66695	-	NN-NN
ceh-37	X	14197986	14198107	77	508	496	2.68885	19.2277	13.0951	2.83812	2.28397	-	NN-NN
lim-7	I	5724962	5725171	27	178	153	0.942845	6.73727	4.03943	2.83707	2.09906	+	gt-ag
nhr-13	V	2194038	2196171	43	283	186	1.50157	10.7115	4.91068	2.83462	1.70945	+	gt-ag
mlt-7	II	4401052	4402030	85	559	1014	2.96822	21.1581	26.7711	2.83354	3.17301	+	gt-ag
F28F9.3	IV	3835675	3835794	14	92	109	0.488883	3.48219	2.87776	2.83243	2.55739	+	gt-ag
cdh-1	III	2926301	2927213	14	92	87	0.488883	3.48219	2.29693	2.83243	2.23215	+	gt-ag
Y47D3B.6	III	11427284	11427379	256	1679	2365	8.93957	63.5499	62.4395	2.82961	2.80418	+	gt-ag
F44A2.3	V	9308182	9308299	18	118	223	0.628563	4.46628	5.88753	2.82894	3.22753	+	gt-ag
elp-1	V	20765131	20765536	18	118	128	0.628563	4.46628	3.37939	2.82894	2.42663	-	NN-NN
eri-6	I	4458649	4463457	11	72	56	0.384122	2.72519	1.47848	2.82672	1.94448	+	gt-ag
fbn-1	III	7633872	7634818	33	216	110	1.15237	8.17557	2.90416	2.82672	1.33352	+	gt-ag
abhd-3.2	X	976429	976718	138	902	502	4.81899	34.1406	13.2535	2.82469	1.45958	-	NN-NN
gbb-2	IV	4490614	4495533	21	137	42	0.733324	5.18543	1.10886	2.82194	0.596558	-	NN-NN
snx-14	II	13527723	13527913	51	332	341	1.78093	12.5661	9.00291	2.81884	2.33776	-	NN-NN
irx-1	I	9537198	9538205	10	65	118	0.349202	2.46024	3.11538	2.81667	3.15727	-	NN-NN
T28F2.2	I	3637773	3638299	16	104	92	0.558723	3.93638	2.42894	2.81667	2.12012	+	gt-ag
unc-49	III	10523157	10524243	22	143	227	0.768244	5.41253	5.99314	2.81667	2.96368	+	gt-ag
grd-14	X	8500442	8500808	143	928	2158	4.99359	35.1247	56.9744	2.81434	3.51217	+	gt-ag
C54C6.7	III	3545819	3546084	33	214	54	1.15237	8.09987	1.42568	2.8133	0.307052	-	NN-NN
C06E2.1	X	8874239	8874330	31	201	241	1.08253	7.60782	6.36276	2.81308	2.55525	-	NN-NN
C03A3.2	X	11263762	11264104	40	259	209	1.39681	9.80311	5.51791	2.81111	1.98199	+	gt-ag
mod-1	V	8910989	8911110	19	123	156	0.663484	4.65553	4.11863	2.81081	2.63403	-	NN-NN
sem-4	I	7043833	7044584	69	446	561	2.40949	16.881	14.8112	2.8086	2.61989	+	gt-ag
nas-36	I	7530798	7530894	13	84	204	0.453962	3.17939	5.3859	2.8081	3.56854	+	gt-ag
dao-6	III	9735533	9735932	63	407	588	2.19997	15.4049	15.5241	2.80783	2.81895	-	NN-NN
gei-4	III	346109	346289	24	155	16	0.838084	5.86673	0.422424	2.80739	-0.988404	-	NN-NN
kri-1	I	8238836	8239021	11	71	169	0.384122	2.68734	4.46185	2.80654	3.53801	-	NN-NN
nhr-213	V	15896302	15896486	11	71	97	0.384122	2.68734	2.56094	2.80654	2.73704	-	NN-NN
prk-1	III	6990423	6996481	11	71	83	0.384122	2.68734	2.19132	2.80654	2.51217	+	gt-ag
lgc-21	X	14066811	14066935	44	284	621	1.53649	10.7494	16.3953	2.80654	3.41558	-	NN-NN
cdf-1	X	6500753	6501264	56	361	277	1.95553	13.6638	7.31321	2.80473	1.90295	-	NN-NN
tat-2	IV	4841763	4846890	14	90	113	0.488883	3.40649	2.98337	2.80072	2.60938	-	NN-NN
grl-16	I	573893	574145	84	540	535	2.9333	20.4389	14.1248	2.80072	2.26764	-	NN-NN
F21G4.1	X	9890262	9890351	35	225	90	1.22221	8.51621	2.37613	2.80072	0.959128	-	NN-NN
F47E1.17,linc-22	X	9069556	9069860	12	77	19	0.419042	2.91444	0.501628	2.79805	0.259523	+	gt-ag
B0511.11	I	10650430	10653799	34	218	66	1.18729	8.25127	1.7425	2.79695	0.553489	-	NN-NN
F13H8.5	II	6253536	6253612	17	109	377	0.593643	4.12563	9.95336	2.79695	4.06752	-	NN-NN
prde-1	V	15538873	15539867	32	205	143	1.11745	7.75922	3.77541	2.79571	1.75643	+	gt-ag
glb-24	V	12884539	12884934	10	64	228	0.349202	2.42239	6.01954	2.7943	4.10752	-	NN-NN
mgl-3	IV	5448074	5448200	10	64	17	0.349202	2.42239	0.448825	2.7943	0.362093	+	gt-ag
wip-1	III	5019535	5019845	30	192	26	1.04761	7.26717	0.686439	2.7943	-0.609893	+	gt-ag
ilys-4	IV	7896292	7896378	53	339	405	1.85077	12.8311	10.6926	2.79345	2.53042	-	NN-NN
ZC504.3	X	10418512	10418890	38	243	168	1.32697	9.19751	4.43545	2.79311	1.74095	-	NN-NN
plc-1	X	10806846	10807000	19	121	246	0.663484	4.57983	6.49477	2.78716	3.29115	-	NN-NN
C42D4.3	IV	7179824	7180029	238	1515	1489	8.311	57.3425	39.3118	2.78651	2.24187	+	gt-ag
syx-3	X	5349717	5350148	69	439	332	2.40949	16.6161	8.7653	2.78578	1.86307	+	gt-ag
wdr-23	I	7600333	7600435	36	229	67	1.25713	8.66761	1.7689	2.7855	0.492722	+	gt-ag
B0524.5	III	1892090	1893284	25	159	29	0.873005	6.01812	0.765643	2.78525	-0.189317	-	NN-NN
K08D8.7	IV	12897986	12898289	14	89	35	0.488883	3.36864	0.924052	2.7846	0.918486	+	gt-ag
asns-1	V	8546891	8547052	90	571	1002	3.14282	21.6123	26.4543	2.78172	3.07337	+	gt-ag
T05F1.11	I	9654924	9655068	12	76	235	0.419042	2.87659	6.20435	2.77919	3.88811	+	gt-ag
tfbm-1	I	3855963	3856945	24	152	101	0.838084	5.75318	2.66655	2.77919	1.66981	-	NN-NN
F35B3.4	X	17020346	17020532	217	1374	1823	7.57768	52.0057	48.1299	2.77884	2.66711	-	NN-NN
wht-8	III	11222200	11222423	25	158	26	0.873005	5.98027	0.686439	2.77615	-0.346858	+	gt-ag
ZC262.9	III	8337768	8338122	160	1011	961	5.58723	38.2662	25.3718	2.77587	2.18302	-	NN-NN
T08D2.7	X	188199	190407	19	120	130	0.663484	4.54198	3.43219	2.77519	2.371	+	gt-ag
B0403.5	X	7057907	7058457	71	448	634	2.47933	16.9567	16.7385	2.77383	2.75515	+	gt-ag
F54C9.14	II	8562838	8563296	26	164	155	0.907925	6.20737	4.09223	2.77334	2.17224	+	gt-ag
C23H3.2	II	62998	63078	49	309	357	1.71109	11.6956	9.42533	2.77298	2.46163	+	gt-ag
Y54E10A.11	I	3183330	3184316	36	227	160	1.25713	8.59191	4.22424	2.77285	1.74856	-	NN-NN
hgap-1	I	706664	707946	10	63	108	0.349202	2.38454	2.85136	2.77158	3.02952	-	NN-NN
nhr-71	X	13747470	13747855	30	189	288	1.04761	7.15362	7.60363	2.77158	2.85959	+	gt-ag
nep-6	II	3419623	3419791	20	126	45	0.698404	4.76908	1.18807	2.77158	0.766483	+	gt-ag
Y61A9LA.1	V	4600924	4601447	24	151	140	0.838084	5.71533	3.69621	2.76967	2.14088	+	gt-ag
sem-2	I	5206800	5207320	49	308	451	1.71109	11.6578	11.9071	2.7683	2.79883	-	NN-NN
cdc-14	II	5589927	5590793	21	132	52	0.733324	4.99618	1.37288	2.7683	0.90468	-	NN-NN
rad-54	I	9067596	9067908	25	157	157	0.873005	5.94243	4.14503	2.76699	2.24732	+	gt-ag
dpy-1	III	2042108	2042320	11	69	102	0.384122	2.61164	2.69295	2.76532	2.80955	-	NN-NN
mnp-1	III	4362079	4363232	15	94	266	0.523803	3.55789	7.0228	2.76392	3.74495	+	gt-ag
H10E21.4	III	17561	17911	166	1040	1965	5.79675	39.3638	51.8789	2.76355	3.16183	-	NN-NN
M03D4.4	IV	6125198	6127155	46	288	180	1.60633	10.9008	4.75227	2.76259	1.56485	-	NN-NN
nhr-103	V	2226573	2226670	12	75	159	0.419042	2.83874	4.19784	2.76008	3.32448	+	gt-ag
xpf-1	II	11703780	11704081	40	250	153	1.39681	9.46246	4.03943	2.76008	1.53202	+	gt-ag
pgp-12	X	12736021	12736206	25	156	129	0.873005	5.90458	3.40579	2.75777	1.96393	+	gt-ag
E02A10.3	V	12587437	12587586	25	156	68	0.873005	5.90458	1.7953	2.75777	1.04016	+	gt-ag
Y59C2A.3	II	2217632	2217795	17	106	68	0.593643	4.01208	1.7953	2.75668	1.59656	-	NN-NN
Y57G11C.42	IV	14741761	14741907	82	511	736	2.86346	19.3413	19.4315	2.75585	2.76257	+	gt-ag
unc-31	IV	12777676	12777800	19	118	220	0.663484	4.46628	5.80833	2.75094	3.12999	+	gt-ag
C25H3.8	II	5678243	5678925	59	366	224	2.06029	13.853	5.91393	2.74928	1.52127	-	NN-NN
T08D2.7	X	187863	188120	10	62	111	0.349202	2.34669	2.93057	2.74849	3.06905	+	gt-ag
C14B4.2	V	19337585	19338492	10	62	84	0.349202	2.34669	2.21773	2.74849	2.66695	-	NN-NN
snt-1	II	6815626	6815877	41	254	57	1.43173	9.61386	1.50489	2.74736	0.0718962	+	gt-ag
tmc-1	X	1173264	1173359	27	167	152	0.942845	6.32092	4.01303	2.74504	2.0896	+	gt-ag
irk-3	X	14353866	14353972	22	136	164	0.768244	5.14758	4.32984	2.74426	2.49468	-	NN-NN
F48A9.1	I	6595546	6595737	24	148	69	0.838084	5.60178	1.8217	2.74072	1.12012	+	gt-ag
grdn-1	V	18603918	18604935	44	271	227	1.53649	10.2573	5.99314	2.73894	1.96368	+	gt-ag
par-4	V	18104367	18105572	19	117	145	0.663484	4.42843	3.82822	2.73866	2.52854	+	gt-ag
attf-6	I	12792989	12794196	69	424	243	2.40949	16.0483	6.41556	2.73562	1.41285	-	NN-NN
F23C8.13	I	2415279	2415842	14	86	94	0.488883	3.25509	2.48174	2.73514	2.34379	+	gt-ag
K02E10.1	X	2500480	2500552	43	264	191	1.50157	9.99236	5.04268	2.73436	1.74772	+	gt-ag
Y56A3A.33	III	12001227	12002026	30	184	38	1.04761	6.96437	1.00326	2.7329	-0.0624049	-	NN-NN
paf-2	X	4293798	4294197	70	429	226	2.44441	16.2376	5.96674	2.73178	1.28745	-	NN-NN
rbf-1	III	6697540	6697985	16	98	125	0.558723	3.70928	3.30019	2.73094	2.56234	+	gt-ag
pde-4	II	7629082	7629491	32	196	89	1.11745	7.41857	2.34973	2.73094	1.07229	-	NN-NN
unc-129	IV	9004600	9005020	58	355	231	2.02537	13.4367	6.09874	2.72992	1.59033	-	NN-NN
ptr-5	X	17318643	17319077	17	104	93	0.593643	3.93638	2.45534	2.7292	2.04825	+	gt-ag
Y51A2D.18	V	18482230	18482414	52	318	158	1.81585	12.0362	4.17144	2.72867	1.1999	-	NN-NN
W02F12.2	V	6695626	6696017	62	379	187	2.16505	14.3451	4.93708	2.72808	1.18926	-	NN-NN
Y108G3AL.2	V	171356	176679	18	110	66	0.628563	4.16348	1.7425	2.72766	1.47103	+	gt-ag
tag-80	IV	7624893	7626594	28	171	103	0.977765	6.47232	2.71935	2.72672	1.4757	+	gt-ag
pat-12	III	729458	729580	48	293	217	1.67617	11.09	5.72912	2.72602	1.77315	-	NN-NN
ncr-1	X	4475005	4475281	49	299	237	1.71109	11.3171	6.25715	2.72552	1.87059	-	NN-NN
btf-1	II	13203434	13204540	22	134	284	0.768244	5.07188	7.49802	2.72288	3.28687	+	gt-ag
F52C9.1	III	5327946	5328218	22	134	56	0.768244	5.07188	1.47848	2.72288	0.944481	+	gt-ag
zfh-2	I	819422	820264	23	140	39	0.803164	5.29898	1.02966	2.72195	0.358398	+	gt-ag
daf-4	III	5628969	5629461	35	213	159	1.22221	8.06202	4.19784	2.72165	1.78016	+	gt-ag
Y59E9AL.4	IV	5212065	5212235	12	73	169	0.419042	2.76304	4.46185	2.72109	3.41248	-	NN-NN
cdc-48.3	I	8033326	8033527	36	219	220	1.25713	8.28912	5.80833	2.72109	2.20799	-	NN-NN
C27A12.9	I	6066465	6066807	48	292	221	1.67617	11.0522	5.83473	2.72109	1.7995	-	NN-NN
nhr-5	IV	15402310	15403163	16	97	39	0.558723	3.67143	1.02966	2.71614	0.88196	+	gt-ag
cpx-2	X	13067595	13067969	17	103	134	0.593643	3.89853	3.5378	2.71526	2.57518	-	NN-NN
Y70D2A.1	X	14921036	14921290	18	109	347	0.628563	4.12563	9.16132	2.71449	3.86543	+	gt-ag
F56F11.4	III	2860638	2861895	37	224	46	1.29205	8.47836	1.21447	2.71413	-0.0893333	+	gt-ag
ser-4	III	1732703	1732939	20	121	311	0.698404	4.57983	8.21086	2.71316	3.5554	-	NN-NN
abu-1	V	10381649	10381732	49	296	657	1.71109	11.2036	17.3458	2.71097	3.3416	-	NN-NN
tat-2	IV	4828644	4828751	31	187	86	1.08253	7.07792	2.27053	2.70892	1.06863	-	NN-NN
tyr-2	III	13745533	13745715	240	1446	3045	8.38084	54.7309	80.3925	2.70719	3.26189	+	gt-ag
F19C7.8	IV	4617515	4623629	11	66	105	0.384122	2.49809	2.77216	2.70119	2.85137	-	NN-NN
Y41D4A.6	IV	1744399	1745025	14	84	130	0.488883	3.17939	3.43219	2.70119	2.81157	-	NN-NN
T21D12.12	IV	266621	267616	69	414	378	2.40949	15.6698	9.97976	2.70119	2.05028	+	gt-ag
islo-1	IV	8136950	8137361	22	132	39	0.768244	4.99618	1.02966	2.70119	0.422529	+	gt-ag
Y111B2A.25	III	12528948	12529117	20	120	117	0.698404	4.54198	3.08897	2.70119	2.14499	+	gt-ag
perm-4	IV	1121911	1123203	25	150	18	0.873005	5.67748	0.475227	2.70119	-0.877373	-	NN-NN
T28C12.4	V	6323489	6323616	95	569	328	3.31742	21.5366	8.65969	2.69866	1.38425	+	gt-ag
sesn-1	I	29367	29769	51	305	412	1.78093	11.5442	10.8774	2.69647	2.61063	-	NN-NN
Y32H12A.8	III	5387194	5387347	64	382	309	2.23489	14.4586	8.15806	2.69365	1.86802	-	NN-NN
ark-1	IV	12625448	12626352	34	202	266	1.18729	7.64567	7.0228	2.68697	2.56438	-	NN-NN
F33H2.8	I	15031486	15031702	34	202	109	1.18729	7.64567	2.87776	2.68697	1.27728	-	NN-NN
nhr-47	V	5508540	5509320	15	89	171	0.523803	3.36864	4.51466	2.68507	3.10752	+	gt-ag
mboa-7	X	10523610	10523727	45	267	136	1.57141	10.1059	3.5906	2.68507	1.19217	-	NN-NN
nlp-28	V	3988024	3988107	29	172	212	1.01269	6.51017	5.59712	2.68451	2.4665	+	gt-ag
Y39B6A.27	V	19033544	19033895	14	83	57	0.488883	3.14154	1.50489	2.68391	1.62209	+	gt-ag
sfxn-1.2	II	11187654	11187727	14	83	56	0.488883	3.14154	1.47848	2.68391	1.59656	+	gt-ag
ntl-11	IV	15467732	15468526	53	314	103	1.85077	11.8849	2.71935	2.68293	0.555138	-	NN-NN
Y59C2A.2	II	2199875	2200775	12	71	169	0.419042	2.68734	4.46185	2.68101	3.41248	-	NN-NN
zfh-2	I	805880	810861	12	71	18	0.419042	2.68734	0.475227	2.68101	0.181521	+	gt-ag
ptr-5	X	17321456	17321805	36	213	208	1.25713	8.06202	5.49151	2.68101	2.12707	+	gt-ag
T07D4.2	II	8869987	8870120	35	207	375	1.22221	7.83492	9.90056	2.68043	3.01802	-	NN-NN
T28C12.4	V	6324924	6325076	183	1082	367	6.39039	40.9535	9.68935	2.68001	0.600495	+	gt-ag
Y45F10A.7	IV	13493815	13493895	11	65	74	0.384122	2.46024	1.95371	2.67916	2.34658	+	gt-ag
Y71H2AM.10	III	2711168	2711840	11	65	47	0.384122	2.46024	1.24087	2.67916	1.69172	-	NN-NN
dpy-1	III	2040962	2042029	11	65	28	0.384122	2.46024	0.739242	2.67916	0.944481	-	NN-NN
ttr-32	III	7567064	7567174	97	573	1058	3.38726	21.688	27.9328	2.6787	3.04377	+	gt-ag
dyc-1	X	14058726	14059186	21	124	281	0.733324	4.69338	7.41882	2.6781	3.33867	+	gt-ag
C54D10.14	V	12438325	12438622	10	59	10	0.349202	2.23314	0.264015	2.67694	-0.403442	-	NN-NN
mec-1	V	6957398	6957490	20	118	113	0.698404	4.46628	2.98337	2.67694	2.09481	+	gt-ag
M116.5	IV	8420303	8420384	35	206	247	1.22221	7.79707	6.52117	2.67344	2.41564	-	NN-NN
pdk-1	X	1326707	1327374	32	188	127	1.11745	7.11577	3.35299	2.67081	1.58524	+	gt-ag
unc-2	X	2725761	2730538	38	223	225	1.32697	8.44051	5.94034	2.6692	2.16241	-	NN-NN
M01H9.4	IV	4481725	4482557	68	399	367	2.37457	15.1021	9.68935	2.66901	2.02873	-	NN-NN
C03H5.6	II	397670	397833	22	129	110	0.768244	4.88263	2.90416	2.66802	1.91849	-	NN-NN
snpc-3.2	I	253469	253708	27	158	156	0.942845	5.98027	4.11863	2.66512	2.12707	+	gt-ag
snpc-3.1	IV	5484611	5484860	27	158	156	0.942845	5.98027	4.11863	2.66512	2.12707	-	NN-NN
F58H1.5	V	11961530	11962199	40	234	74	1.39681	8.85686	1.95371	2.66466	0.484083	+	gt-ag
pqn-31	V	9109678	9109801	215	1257	711	7.50784	47.5773	18.7715	2.6638	1.32207	+	gt-ag
rig-1	X	8663241	8663674	32	187	142	1.11745	7.07792	3.74901	2.66312	1.74631	+	gt-ag
ttn-1	V	6131049	6133050	76	443	380	2.65393	16.7675	10.0326	2.65946	1.91849	-	NN-NN
Y57A10A.8	II	12167894	12169151	23	134	136	0.803164	5.07188	3.5906	2.65875	2.16046	+	gt-ag
ZK353.10	III	8390722	8394321	17	99	116	0.593643	3.74713	3.06257	2.65812	2.36708	-	NN-NN
col-41	X	15175591	15175662	1054	6132	18817	36.8059	232.095	496.797	2.65671	3.75465	-	NN-NN
E01G6.3	X	12242729	12242980	16	93	129	0.558723	3.52004	3.40579	2.65538	2.60779	+	gt-ag
glb-29	II	12013245	12013784	16	93	67	0.558723	3.52004	1.7689	2.65538	1.66265	+	gt-ag
T25G12.6	X	17229335	17229789	26	151	102	0.907925	5.71533	2.69295	2.65419	1.56854	-	NN-NN
Y69E1A.3	IV	10952713	10952992	26	151	29	0.907925	5.71533	0.765643	2.65419	-0.245901	+	gt-ag
hpo-10	III	5879615	5879845	31	180	101	1.08253	6.81297	2.66655	2.65388	1.30057	+	gt-ag
dyb-1	I	1485059	1485926	36	209	97	1.25713	7.91062	2.56094	2.65366	1.02655	+	gt-ag
nlp-38	I	13403473	13403733	77	447	430	2.68885	16.9189	11.3526	2.65357	2.07796	+	gt-ag
pef-1	III	924055	925017	20	116	46	0.698404	4.39058	1.21447	2.65228	0.798192	-	NN-NN
F53A2.3	III	13337411	13338130	39	226	114	1.36189	8.55406	3.00977	2.651	1.14405	-	NN-NN
rict-1	II	13101902	13102710	63	365	225	2.19997	13.8152	5.94034	2.6507	1.43306	-	NN-NN
skpo-3	II	7247649	7247812	118	683	683	4.12058	25.8514	18.0322	2.64932	2.12966	+	gt-ag
nipi-3	X	15608803	15608933	103	595	503	3.59678	22.5207	13.28	2.64647	1.88447	+	gt-ag
ZK180.5	IV	4517041	4517116	226	1303	5360	7.89196	49.3183	141.512	2.64367	4.1644	-	NN-NN
T12B5.9,fbxa-59	III	941757	943346	90	518	440	3.14282	19.6062	11.6167	2.64118	1.88606	-	NN-NN
fem-3	IV	9105839	9106211	28	161	76	0.977765	6.09382	2.00651	2.63979	1.03713	+	gt-ag
twk-29	I	9463882	9465083	31	178	151	1.08253	6.73727	3.98663	2.63776	1.88077	+	gt-ag
spsb-1	II	15220445	15222831	173	993	807	6.04119	37.5849	21.306	2.63725	1.81835	+	gt-ag
myo-5	V	8109104	8109788	72	413	791	2.51425	15.632	20.8836	2.6363	3.05417	+	gt-ag
T22C1.6	I	7943759	7943910	86	493	347	3.00314	18.66	9.16132	2.63541	1.60909	+	gt-ag
ncx-2	V	5308174	5308477	59	338	532	2.06029	12.7932	14.0456	2.63446	2.7692	+	gt-ag
K03H6.5	IV	1527434	1527555	11	63	138	0.384122	2.38454	3.64341	2.63407	3.24565	-	NN-NN
brd-1	III	6888576	6888894	22	126	60	0.768244	4.76908	1.58409	2.63407	1.04402	-	NN-NN
F10B5.3	II	8147693	8148360	62	355	213	2.16505	13.4367	5.62352	2.6337	1.37707	-	NN-NN
cpna-1	II	4207431	4207892	51	292	373	1.78093	11.0522	9.84776	2.63363	2.46716	+	gt-ag
ZK180.5	IV	4515475	4515682	186	1064	2382	6.49515	40.2722	62.8884	2.63235	3.27536	-	NN-NN
nep-21	V	14220136	14220423	50	286	50	1.74601	10.8251	1.32007	2.63224	-0.403442	-	NN-NN
rdy-2	V	13600211	13600728	14	80	50	0.488883	3.02799	1.32007	2.6308	1.43306	-	NN-NN
Y41C4A.11	III	11722977	11723217	186	1059	466	6.49515	40.083	12.3031	2.62555	0.921585	+	gt-ag
eri-3	II	1125873	1126323	16	91	59	0.558723	3.44434	1.55769	2.62402	1.4792	+	gt-ag
C25G6.1	X	1271699	1271975	22	125	159	0.768244	4.73123	4.19784	2.62258	2.45001	+	gt-ag
ZC262.10	III	8345963	8346317	108	613	588	3.77138	23.202	15.5241	2.62108	2.04134	-	NN-NN
zip-12	III	12330872	12331665	50	283	365	1.74601	10.7115	9.63654	2.61703	2.46445	+	gt-ag
Y38E10A.14	II	12623673	12623819	52	294	82	1.81585	11.1279	2.16492	2.61546	0.25367	-	NN-NN
F52B5.3	I	8319973	8320184	20	113	191	0.698404	4.27703	5.04268	2.61448	2.85206	-	NN-NN
ncam-1	X	695421	695577	28	158	264	0.977765	5.98027	6.96999	2.61265	2.8336	+	gt-ag
F26D11.1	V	7982291	7982445	14	79	126	0.488883	2.99014	3.32659	2.61265	2.76648	+	gc-ag
bpl-1	II	6277051	6277140	28	158	183	0.977765	5.98027	4.83147	2.61265	2.3049	+	gt-ag
ace-1	X	16372393	16373075	14	79	74	0.488883	2.99014	1.95371	2.61265	1.99866	+	gt-ag
bre-4	I	1622621	1623182	14	79	72	0.488883	2.99014	1.90091	2.61265	1.95913	-	NN-NN
max-1	V	13100515	13100727	50	282	167	1.74601	10.6737	4.40905	2.61192	1.33641	-	NN-NN
sli-1	X	723702	724095	72	406	248	2.51425	15.367	6.54757	2.61164	1.38083	-	NN-NN
madd-4	I	8932188	8932261	52	293	139	1.81585	11.09	3.66981	2.61054	1.01506	-	NN-NN
C06B8.7	V	15509447	15509626	60	338	166	2.09521	12.7932	4.38265	2.61021	1.06471	+	gt-ag
Y38F2AR.12	IV	2400590	2400906	19	107	78	0.663484	4.04993	2.05932	2.60977	1.63403	-	NN-NN
D1086.7	V	14084470	14084830	19	107	62	0.663484	4.04993	1.63689	2.60977	1.30283	+	gt-ag
F21D5.3	IV	8731374	8731575	92	518	403	3.21266	19.6062	10.6398	2.60947	1.72763	+	gt-ag
Y47G6A.19	I	3525939	3526110	16	90	179	0.558723	3.40649	4.72587	2.60808	3.08037	-	NN-NN
T10G3.3	V	13487584	13488047	223	1253	747	7.7872	47.4259	19.7219	2.6065	1.34062	-	NN-NN
ZC8.6	X	4977029	4977843	18	101	154	0.628563	3.82283	4.06583	2.60451	2.69342	-	NN-NN
Y104H12D.2	IV	1179587	1181314	90	505	176	3.14282	19.1142	4.64666	2.60451	0.564137	+	gt-ag
vamp-7	IV	2608314	2608463	23	129	120	0.803164	4.88263	3.16818	2.60389	1.97989	+	gt-ag
amx-2	I	12763666	12763740	51	286	247	1.78093	10.8251	6.52117	2.60367	1.8725	-	NN-NN
flp-32	X	15433868	15434526	96	538	948	3.35234	20.3632	25.0286	2.60273	2.90034	+	gt-ag
C27F2.1	III	4990279	4990588	10	56	27	0.349202	2.11959	0.71284	2.60165	1.02952	+	gt-ag
lron-2	V	9284959	9285364	50	280	245	1.74601	10.598	6.46837	2.60165	1.88934	-	NN-NN
C23G10.1	III	6212210	6212384	22	123	17	0.768244	4.65553	0.448825	2.59931	-0.775411	+	gt-ag
T05C12.8	II	8189198	8189876	12	67	214	0.419042	2.53594	5.64992	2.59735	3.75306	-	NN-NN
Y105E8A.1	I	14341941	14342044	24	134	30	0.838084	5.07188	0.792045	2.59735	-0.0815138	-	NN-NN
gly-6	III	4325523	4325746	67	374	68	2.33965	14.1558	1.7953	2.59703	-0.382068	-	NN-NN
Y65B4BL.3	I	497830	498427	19	106	141	0.663484	4.01208	3.72261	2.59622	2.48818	-	NN-NN
F54C1.1	I	5009853	5010385	40	223	230	1.39681	8.44051	6.07234	2.5952	2.12012	+	gt-ag
F26E4.3	I	9763359	9763569	94	524	257	3.2825	19.8333	6.78518	2.59506	1.04759	-	NN-NN
twk-31	III	11415659	11415819	14	78	96	0.488883	2.95229	2.53454	2.59427	2.37417	+	gt-ag
mdt-27	V	9211237	9211846	51	284	316	1.78093	10.7494	8.34287	2.59355	2.22791	-	NN-NN
F02E11.2	II	3263074	3264199	23	128	14	0.803164	4.84478	0.369621	2.59266	-1.11965	+	gt-ag
skpo-3	II	7246569	7246824	39	217	319	1.36189	8.21342	8.42208	2.59237	2.62857	+	gt-ag
W09B7.1	V	8831269	8831364	32	178	33	1.11745	6.73727	0.871249	2.59196	-0.359048	+	gc-ag
F07B7.1	V	8873363	8873458	32	178	27	1.11745	6.73727	0.71284	2.59196	-0.648554	+	gc-ag
Y41E3.11	IV	15039661	15040073	38	211	321	1.32697	7.98632	8.47488	2.5894	2.67506	+	gt-ag
ptr-12	I	2589808	2590535	69	383	312	2.40949	14.4965	8.23727	2.5889	1.77344	-	NN-NN
W01A8.6	I	7071935	7072210	20	111	167	0.698404	4.20133	4.40905	2.58871	2.65833	-	NN-NN
C14B4.2	V	19335651	19336801	40	222	192	1.39681	8.40266	5.06909	2.58871	1.85959	-	NN-NN
fmi-1	V	13026675	13027213	20	111	84	0.698404	4.20133	2.21773	2.58871	1.66695	+	gt-ag
lin-3	IV	11062200	11063094	11	61	156	0.384122	2.30884	4.11863	2.58753	3.42253	+	gt-ag
spr-2	IV	8891972	8892046	44	244	357	1.53649	9.23536	9.42533	2.58753	2.61691	+	gt-ag
him-14	II	7065505	7066827	13	72	49	0.453962	2.72519	1.29367	2.58571	1.51083	-	NN-NN
C31B8.8	V	2907527	2907848	58	321	263	2.02537	12.1498	6.94359	2.58467	1.7775	-	NN-NN
R07E4.1	X	5964876	5965608	38	210	92	1.32697	7.94847	2.42894	2.58254	0.872193	+	gt-ag
lips-17	II	7610264	7610712	31	171	469	1.08253	6.47232	12.3823	2.57988	3.51581	+	gt-ag
Y52B11A.10	I	11049374	11049951	35	193	92	1.22221	7.30502	2.42894	2.5794	0.990837	+	gt-ag
hpo-36	V	3728232	3728644	37	204	39	1.29205	7.72137	1.02966	2.5792	-0.327493	-	NN-NN
lgc-47	X	9807029	9807395	41	226	181	1.43173	8.55406	4.77867	2.57885	1.73885	-	NN-NN
cutl-24	IV	169221	169725	16	88	142	0.558723	3.33079	3.74901	2.57566	2.74631	+	gt-ag
W03F9.11	V	140578	141147	60	330	295	2.09521	12.4904	7.78844	2.57566	1.89424	-	NN-NN
nhr-40	X	2599489	2600806	18	99	59	0.628563	3.74713	1.55769	2.57566	1.30928	+	gt-ag
ZK185.2	IV	4539305	4539490	24	132	96	0.838084	4.99618	2.53454	2.57566	1.59656	+	gt-ag
itx-1	I	2807330	2807619	73	401	368	2.54917	15.1778	9.71575	2.57386	1.9303	+	gt-ag
myo-5	V	8112526	8112844	126	692	710	4.39994	26.1921	18.7451	2.57357	2.09095	+	gt-ag
acy-3	III	3776931	3777423	61	335	213	2.13013	12.6797	5.62352	2.57351	1.40053	-	NN-NN
dmsr-1	V	11441109	11441187	47	258	72	1.64125	9.76526	1.90091	2.57286	0.211894	+	gt-ag
R12C12.8	II	6060279	6060677	39	214	138	1.36189	8.09987	3.64341	2.57229	1.41968	-	NN-NN
BE0003N10.1	III	1044183	1045237	25	137	178	0.873005	5.18543	4.69947	2.5704	2.42844	+	gt-ag
ncx-2	V	5308174	5308802	73	400	211	2.54917	15.1399	5.57071	2.57026	1.12783	+	gt-ag
M117.1	IV	11814470	11816747	21	115	167	0.733324	4.35273	4.40905	2.5694	2.58795	+	gt-ag
C08E8.4	V	18372286	18372660	79	432	281	2.75869	16.3511	7.41882	2.56733	1.4272	+	gt-ag
igeg-1	IV	4564871	4565630	71	388	559	2.47933	14.6857	14.7584	2.56639	2.57352	+	gt-ag
C54D10.10	V	12449001	12449147	67	366	196	2.33965	13.853	5.17469	2.56584	1.14518	-	NN-NN
Y50D4B.6	V	1086496	1086985	13	71	160	0.453962	2.68734	4.22424	2.56553	3.21805	+	gt-ag
inx-3	X	5996308	5996708	26	142	67	0.907925	5.37468	1.7689	2.56553	0.962208	+	gt-ag
cah-6	I	3629739	3629901	35	191	202	1.22221	7.22932	5.3331	2.56437	2.12549	+	gt-ag
K09F5.6	X	7719586	7720127	44	240	143	1.53649	9.08396	3.77541	2.56368	1.297	+	gt-ag
cgt-1	V	15887183	15887301	22	120	130	0.768244	4.54198	3.43219	2.56368	2.15949	-	NN-NN
nep-12	II	4776987	4777942	22	120	22	0.768244	4.54198	0.580833	2.56368	-0.403442	-	NN-NN
pqn-67	V	12925631	12925827	20	109	102	0.698404	4.12563	2.69295	2.56248	1.94706	+	gt-ag
pie-1	III	12427507	12428543	20	109	44	0.698404	4.12563	1.16167	2.56248	0.734062	+	gt-ag
Y36E3A.2	V	15426446	15426598	49	267	76	1.71109	10.1059	2.00651	2.56221	0.229776	+	gt-ag
Y32H12A.8	III	5396189	5396469	18	98	144	0.628563	3.70928	3.80181	2.56101	2.59656	-	NN-NN
glt-6	IV	7503855	7504175	27	147	56	0.942845	5.56393	1.47848	2.56101	0.649026	+	gt-ag
mup-4	III	7488196	7488987	142	773	1485	4.95867	29.2579	39.2062	2.5608	2.98306	-	NN-NN
ptp-3	II	10994409	10995024	61	332	497	2.13013	12.5661	13.1215	2.56053	2.62292	+	gt-ag
ZK896.1	IV	12873481	12873935	16	87	14	0.558723	3.29294	0.369621	2.55917	-0.596087	-	NN-NN
catp-3	V	8077632	8077739	140	761	904	4.88883	28.8037	23.8669	2.5587	2.28745	+	gt-ag
T20D3.5	IV	9337746	9337832	83	451	388	2.89838	17.0703	10.2438	2.55817	1.82143	+	gt-ag
mgl-2	I	10386495	10386643	79	429	201	2.75869	16.2376	5.3067	2.55728	0.943829	-	NN-NN
C06A8.8	II	7767120	7767545	42	228	110	1.46665	8.62976	2.90416	2.5568	0.9856	-	NN-NN
nex-3	III	4442568	4443005	106	575	227	3.70154	21.7637	5.99314	2.55572	0.695186	+	gt-ag
henn-1	III	8232699	8232887	33	179	122	1.15237	6.77512	3.22098	2.55565	1.4829	+	gt-ag
tbcd-1	I	8364763	8364942	26	141	174	0.907925	5.33683	4.59386	2.55534	2.33906	-	NN-NN
C18E3.3	I	4204240	4204728	19	103	70	0.663484	3.89853	1.8481	2.5548	1.47791	+	gt-ag
F47G3.4	X	2381647	2381971	62	336	408	2.16505	12.7175	10.7718	2.55435	2.31479	+	gt-ag
nas-38	X	558469	558843	103	558	1211	3.59678	21.1202	31.9722	2.55385	3.15204	+	gt-ag
K04C2.5	III	6891302	6891484	12	65	354	0.419042	2.46024	9.34613	2.55363	4.4792	-	NN-NN
ZK757.2	III	9876325	9877265	12	65	178	0.419042	2.46024	4.69947	2.55363	3.48733	-	NN-NN
ctbp-1	X	5869651	5870518	12	65	122	0.419042	2.46024	3.22098	2.55363	2.94233	+	gt-ag
panl-2	III	6964707	6964779	12	65	92	0.419042	2.46024	2.42894	2.55363	2.53516	-	NN-NN
sul-3	X	7832696	7833881	284	1538	1036	9.91733	58.2131	27.3519	2.55332	1.46362	-	NN-NN
C52D10.12	IV	17204817	17205493	68	368	287	2.37457	13.9287	7.57723	2.55233	1.674	-	NN-NN
slc-17.7	V	9264599	9264862	49	265	143	1.71109	10.0302	3.77541	2.55136	1.14172	-	NN-NN
daf-1	IV	136528	136656	37	200	257	1.29205	7.56997	6.78518	2.55063	2.39273	+	gt-ag
K02E2.1	V	20354252	20354762	10	54	21	0.349202	2.04389	0.554431	2.54919	0.666947	+	gt-ag
F11C1.10	X	12977232	12977724	10	54	19	0.349202	2.04389	0.501628	2.54919	0.522558	+	gt-ag
madf-2	I	11277778	11278798	15	81	103	0.523803	3.06584	2.71935	2.54919	2.37617	-	NN-NN
Y41C4A.11	III	11720086	11720814	15	81	48	0.523803	3.06584	1.26727	2.54919	1.27463	+	gt-ag
lin-12	III	9069719	9071240	40	216	162	1.39681	8.17557	4.27704	2.54919	1.61448	-	NN-NN
nca-2	III	4978103	4978366	20	108	35	0.698404	4.08778	0.924052	2.54919	0.403913	+	gt-ag
adm-2	X	13692602	13692701	45	243	226	1.57141	9.19751	5.96674	2.54919	1.92488	+	gt-ag
mpz-1	II	10754516	10756732	25	135	96	0.873005	5.10973	2.53454	2.54919	1.53766	-	NN-NN
F14F9.8	V	5130474	5131293	234	1261	1505	8.17132	47.7286	39.7342	2.54621	2.28174	+	gt-ag
Y48A6B.9	III	11035529	11035780	31	167	177	1.08253	6.32092	4.67306	2.54573	2.10997	+	gt-ag
eff-1	II	8348925	8350074	31	167	92	1.08253	6.32092	2.42894	2.54573	1.16592	+	gt-ag
nhr-25	X	13011869	13012328	44	237	253	1.53649	8.97041	6.67958	2.54554	2.12012	+	gt-ag
C11H1.2	X	14306200	14306406	26	140	54	0.907925	5.29898	1.42568	2.54507	0.651006	-	NN-NN
Y17D7C.3	V	18723265	18723625	42	226	300	1.46665	8.55406	7.92045	2.54409	2.43306	-	NN-NN
ccb-1	I	3645583	3646133	45	242	147	1.57141	9.15966	3.88102	2.54324	1.30438	-	NN-NN
K02F3.2	III	847270	847691	30	161	99	1.04761	6.09382	2.61375	2.54025	1.31902	+	gt-ag
spas-1	V	9176326	9176703	22	118	91	0.768244	4.46628	2.40254	2.53944	1.64492	+	gt-ag
dhhc-14	X	8555306	8555725	83	445	436	2.89838	16.8432	11.5111	2.53885	1.9897	+	gt-ag
tyr-1	III	7876399	7876621	25	134	65	0.873005	5.07188	1.7161	2.53846	0.97507	+	gt-ag
Y43F8B.3	V	19516908	19519080	14	75	394	0.488883	2.83874	10.4022	2.53769	4.41126	+	gt-ag
nhr-116	V	16914513	16914831	17	91	113	0.593643	3.44434	2.98337	2.53656	2.32927	+	gt-ag
set-5	V	14706764	14706995	17	91	92	0.593643	3.44434	2.42894	2.53656	2.03266	+	gt-ag
ZK829.1	IV	11940711	11941212	37	198	77	1.29205	7.49427	2.03291	2.53613	0.653891	-	NN-NN
unc-52	II	14650898	14651003	20	107	165	0.698404	4.04993	4.35625	2.53576	2.64095	-	NN-NN
taf-4	I	386336	388046	41	219	239	1.43173	8.28912	6.30996	2.53346	2.13987	+	gt-ag
tat-2	IV	4839263	4839455	41	219	159	1.43173	8.28912	4.19784	2.53346	1.55189	-	NN-NN
Y102A11A.2	X	2030252	2030864	44	235	492	1.53649	8.89471	12.9895	2.53331	3.07964	+	gt-ag
mfap-1	I	8639103	8639234	53	283	157	1.85077	10.7115	4.14503	2.53296	1.16326	-	NN-NN
bris-1	IV	3813102	3815103	27	144	348	0.942845	5.45038	9.18772	2.53126	3.28461	-	NN-NN
F53B3.3	X	2866298	2866517	37	197	82	1.29205	7.45642	2.16492	2.52882	0.744657	-	NN-NN
tbc-7	X	5143699	5143797	28	149	160	0.977765	5.63963	4.22424	2.52804	2.11113	+	gt-ag
C16A11.2	II	4243516	4244561	84	447	255	2.9333	16.9189	6.73238	2.52804	1.19859	+	gt-ag
cyp-14A5	V	5422620	5422962	75	399	359	2.61901	15.1021	9.47814	2.52765	1.85558	-	NN-NN
sir-2.3	X	13332297	13332492	25	133	57	0.873005	5.03403	1.50489	2.52765	0.785592	+	gt-ag
K04C1.3	X	14242002	14242147	22	117	73	0.768244	4.42843	1.92731	2.52716	1.32695	-	NN-NN
T02E1.8	I	8237111	8237197	41	218	244	1.43173	8.25127	6.44196	2.52686	2.16974	+	gt-ag
Y71H2B.1	III	2629091	2630081	19	101	228	0.663484	3.82283	6.01954	2.52651	3.18152	+	gt-ag
utx-1	X	8557924	8558257	13	69	28	0.453962	2.61164	0.739242	2.52431	0.703473	+	gt-ag
unc-1	X	1060685	1062378	23	122	62	0.803164	4.61768	1.63689	2.5234	1.02719	-	NN-NN
F19B2.6	V	20160042	20160189	10	53	101	0.349202	2.00604	2.66655	2.52222	2.93284	+	gt-ag
K10D11.6	IV	12989042	12989296	40	212	233	1.39681	8.02417	6.15155	2.52222	2.13882	-	NN-NN
coq-3	IV	14793620	14795353	135	715	314	4.71423	27.0626	8.29007	2.52121	0.814363	-	NN-NN
faah-4	III	11906788	11906869	27	143	137	0.942845	5.41253	3.617	2.52121	1.9397	-	NN-NN
mel-46	IV	16862831	16863028	89	471	149	3.1079	17.8273	3.93382	2.52008	0.339993	-	NN-NN
K12C11.3	I	1336116	1336209	60	317	116	2.09521	11.9984	3.06257	2.51767	0.547649	+	gt-ag
lgc-39	V	7176699	7177096	18	95	122	0.628563	3.59573	3.22098	2.51616	2.35737	+	gt-ag
K10D6.2	V	11194342	11194774	80	422	284	2.79361	15.9726	7.49802	2.5154	1.42438	-	NN-NN
Y57G7A.11	II	1275929	1276441	11	58	44	0.384122	2.19529	1.16167	2.51478	1.59656	-	NN-NN
F22D3.6	II	6948442	6948734	15	79	120	0.523803	2.99014	3.16818	2.51312	2.59656	-	NN-NN
sma-2	III	8752047	8755040	15	79	116	0.523803	2.99014	3.06257	2.51312	2.54765	+	gt-ag
Y6B3B.7	I	13747970	13750192	19	100	39	0.663484	3.78498	1.02966	2.51215	0.634033	+	gt-ag
cho-1	IV	13212385	13212496	31	163	57	1.08253	6.16952	1.50489	2.51076	0.475252	-	NN-NN
C36E6.1	X	17435530	17435668	78	410	376	2.72377	15.5184	9.92696	2.5103	1.86574	+	gt-ag
T15B12.1	III	5296610	5297705	90	473	183	3.14282	17.903	4.83147	2.51007	0.620405	+	gt-ag
Y45F10B.8	IV	13577487	13577650	12	63	46	0.419042	2.38454	1.21447	2.50854	1.53516	-	NN-NN
Y45F10B.9	IV	13597126	13597289	12	63	46	0.419042	2.38454	1.21447	2.50854	1.53516	-	NN-NN
glt-1	X	3496122	3496624	16	84	93	0.558723	3.17939	2.45534	2.50854	2.13572	+	gt-ag
C27A7.1	V	12131528	12132948	20	105	47	0.698404	3.97423	1.24087	2.50854	0.829219	+	gt-ag
efsc-1	I	12980785	12981498	24	126	134	0.838084	4.76908	3.5378	2.50854	2.07768	+	gt-ag
ZC376.6	V	14188897	14189338	41	215	213	1.43173	8.13772	5.62352	2.50687	1.97372	+	gt-ag
B0511.12	I	10655320	10655655	42	220	157	1.46665	8.32697	4.14503	2.50527	1.49886	-	NN-NN
trpa-2	I	7184955	7185028	13	68	44	0.453962	2.57379	1.16167	2.50325	1.35555	+	gt-ag
F13D2.1	X	11174447	11175076	48	251	419	1.67617	9.50031	11.0622	2.50281	2.7224	-	NN-NN
F36G3.1	X	9782507	9785907	53	277	491	1.85077	10.4844	12.9631	2.50205	2.80822	-	NN-NN
sms-2	X	947732	948767	54	282	530	1.88569	10.6737	13.9928	2.50089	2.89152	-	NN-NN
dys-1	I	11556302	11556468	73	381	80	2.54917	14.4208	2.11212	2.50005	-0.271338	-	NN-NN
ptr-12	I	2594531	2595200	32	167	130	1.11745	6.32092	3.43219	2.49993	1.61893	-	NN-NN
catp-1	I	14437229	14438347	46	240	230	1.60633	9.08396	6.07234	2.49955	1.91849	-	NN-NN
xpc-1	IV	1996921	1999380	37	193	118	1.29205	7.30502	3.11538	2.49923	1.26975	+	gt-ag
vang-1	X	2889420	2890176	14	73	102	0.488883	2.76304	2.69295	2.4987	2.46163	+	gt-ag
Y50D7A.1	III	306687	307135	14	73	69	0.488883	2.76304	1.8217	2.4987	1.89773	+	gt-ag
twk-31	III	11415911	11416640	14	73	24	0.488883	2.76304	0.633636	2.4987	0.374166	+	gt-ag
smp-1	I	14813829	14814479	76	396	466	2.65393	14.9885	12.3031	2.49766	2.21282	+	gt-ag
alh-10	X	7141674	7141944	34	177	237	1.18729	6.69942	6.25715	2.49637	2.39784	-	NN-NN
Y105C5A.8	IV	15612930	15613258	15	78	255	0.523803	2.95229	6.73238	2.49474	3.68402	-	NN-NN
F13H8.1	II	6283539	6283815	20	104	103	0.698404	3.93638	2.71935	2.49474	1.96113	+	gt-ag
slo-1	V	18499694	18501000	40	208	90	1.39681	7.87277	2.37613	2.49474	0.766483	+	gt-ag
K02E10.1	X	2499370	2500383	45	234	238	1.57141	8.85686	6.28355	2.49474	1.99952	+	gt-ag
F13D2.1	X	11168054	11168331	38	197	481	1.32697	7.45642	12.6991	2.49035	3.25852	-	NN-NN
ddr-2	X	3319458	3321028	11	57	152	0.384122	2.15744	4.01303	2.48968	3.38505	+	gt-ag
glr-5	V	8717351	8717538	11	57	143	0.384122	2.15744	3.77541	2.48968	3.297	+	gt-ag
shk-1	II	9767823	9767898	17	88	120	0.593643	3.33079	3.16818	2.48819	2.41599	+	gt-ag
dig-1	III	6774107	6774684	51	264	294	1.78093	9.99236	7.76204	2.48819	2.12381	+	gt-ag
alfa-1	II	7658809	7659587	57	295	411	1.99045	11.1657	10.851	2.48791	2.44666	-	NN-NN
Y73B3A.18	X	59368	59470	29	150	196	1.01269	5.67748	5.17469	2.48706	2.35329	+	gt-ag
ptr-5	X	17322282	17322631	12	62	178	0.419042	2.34669	4.69947	2.48546	3.48733	+	gt-ag
Y51H4A.13	IV	16645092	16646136	30	155	34	1.04761	5.86673	0.897651	2.48546	-0.22287	-	NN-NN
glb-33	V	1353402	1354232	18	93	103	0.628563	3.52004	2.71935	2.48546	2.11313	+	gt-ag
polq-1	III	5791460	5791839	61	315	238	2.13013	11.9227	6.28355	2.4847	1.56064	-	NN-NN
F17A9.2	V	6108970	6113870	74	382	262	2.58409	14.4586	6.91719	2.4842	1.42053	+	gt-ag
C06E8.5	III	7003492	7004038	40	206	531	1.39681	7.79707	14.0192	2.4808	3.3272	-	NN-NN
lact-7	X	11763676	11764035	20	103	161	0.698404	3.89853	4.25064	2.4808	2.60555	+	gt-ag
unc-80	V	20879948	20880662	20	103	141	0.698404	3.89853	3.72261	2.4808	2.41418	+	gt-ag
bra-1	X	13598999	13599233	74	381	117	2.58409	14.4208	3.08897	2.48042	0.25747	+	gt-ag
Y92H12A.4	I	1526005	1526977	34	175	262	1.18729	6.62372	6.91719	2.47997	2.54252	+	gt-ag
F37B4.10	V	2875912	2876234	14	72	118	0.488883	2.72519	3.11538	2.4788	2.67185	-	NN-NN
ugt-25	I	4733782	4734587	66	339	729	2.30473	12.8311	19.2467	2.47697	3.06194	+	gt-ag
rga-5	IV	13831834	13831962	22	113	288	0.768244	4.27703	7.60363	2.47697	3.30705	+	gt-ag
unc-9	X	13213354	13213842	46	236	241	1.60633	8.93256	6.36276	2.47531	1.98589	+	gt-ag
amx-2	I	12762279	12762659	23	118	177	0.803164	4.46628	4.67306	2.47531	2.5406	-	NN-NN
nrx-1	V	10832152	10832245	16	82	107	0.558723	3.10369	2.82496	2.47378	2.33803	+	gt-ag
unc-63	I	5147380	5147657	66	338	252	2.30473	12.7932	6.65318	2.47271	1.52944	+	gt-ag
ztf-16	X	4806876	4807628	25	128	230	0.873005	4.84478	6.07234	2.47237	2.79819	-	NN-NN
acox-3	I	12949370	12950539	17	87	76	0.593643	3.29294	2.00651	2.47171	1.75702	+	gt-ag
B0432.7	II	273172	273413	60	307	176	2.09521	11.6199	4.64666	2.47143	1.1491	-	NN-NN
C26F1.1	V	7785580	7785849	123	629	1355	4.29518	23.8076	35.774	2.47063	3.05812	+	gt-ag
pfkb-1.1	I	5132819	5133327	55	281	487	1.92061	10.6358	12.8575	2.46929	2.74298	+	gt-ag
C01C10.2	X	7437599	7437864	48	245	151	1.67617	9.27321	3.98663	2.4679	1.25	-	NN-NN
jhdm-1	III	6455901	6456020	29	148	242	1.01269	5.60178	6.38916	2.4677	2.65744	+	gt-ag
hot-5	I	8683512	8684014	39	199	59	1.36189	7.53212	1.55769	2.46745	0.193799	-	NN-NN
F40A3.7	V	7897719	7898728	10	51	61	0.349202	1.93034	1.61049	2.46672	2.20537	-	NN-NN
lsl-1	I	9901764	9902001	40	204	185	1.39681	7.72137	4.88428	2.46672	1.80601	+	gt-ag
C36E6.1	X	17436011	17436083	71	362	322	2.47933	13.7016	8.50128	2.46632	1.77773	+	gt-ag
C25E10.5	V	9031179	9031262	21	107	145	0.733324	4.04993	3.82822	2.46538	2.38415	+	gt-ag
Y76B12C.6	IV	1986737	1989259	11	56	123	0.384122	2.11959	3.24738	2.46415	3.07964	+	gt-ag
ccch-1	V	11528045	11528131	33	168	147	1.15237	6.35877	3.88102	2.46415	1.75184	+	gt-ag
C26B9.1	X	5344647	5344866	55	280	313	1.92061	10.598	8.26367	2.46415	2.10522	+	gt-ag
F59B2.8	III	9009935	9010033	22	112	22	0.768244	4.23918	0.580833	2.46415	-0.403442	-	NN-NN
snrp-200	II	12732491	12732605	64	325	244	2.23489	12.3012	6.44196	2.46052	1.5273	-	NN-NN
col-146	V	9630094	9630226	4884	24780	24853	170.55	937.919	656.156	2.45927	1.94384	+	gt-ag
dkf-2	V	16768490	16768803	69	350	363	2.40949	13.2474	9.58374	2.45891	1.99186	+	gt-ag
let-526	I	5309740	5310063	70	355	300	2.44441	13.4367	7.92045	2.45862	1.69609	-	NN-NN
F20G2.5	V	13771826	13772274	15	76	24	0.523803	2.87659	0.633636	2.45726	0.27463	+	gt-ag
ZK1193.2	X	409504	409592	30	152	35	1.04761	5.75318	0.924052	2.45726	-0.181049	-	NN-NN
lir-2	II	7671130	7671710	31	157	211	1.08253	5.94243	5.57071	2.45665	2.36346	+	gt-ag
T20F7.1	X	16877517	16877875	32	162	184	1.11745	6.13167	4.85787	2.45608	2.12012	+	gt-ag
snf-7	III	13007222	13008197	17	86	40	0.593643	3.25509	1.05606	2.45503	0.831023	+	gt-ag
gla-3	I	8215688	8216035	19	96	115	0.663484	3.63358	3.03617	2.45326	2.19412	+	gt-ag
fmi-1	V	13028763	13028845	21	106	136	0.733324	4.01208	3.5906	2.45183	2.2917	+	gt-ag
sumv-2	V	4623017	4623994	86	434	541	3.00314	16.4268	14.2832	2.45151	2.24978	+	gt-ag
M01B12.4	I	3075267	3076564	46	232	218	1.60633	8.78116	5.75553	2.45065	1.84118	-	NN-NN
pdfr-1	III	6636556	6638070	23	116	236	0.803164	4.39058	6.23075	2.45065	2.95564	-	NN-NN
zag-1	IV	3859950	3860321	24	121	298	0.838084	4.57983	7.86764	2.45013	3.23076	+	gt-ag
nac-1	X	14895272	14895643	160	806	692	5.58723	30.507	18.2698	2.44893	1.70926	+	gt-ag
max-2	II	13017582	13018448	85	428	198	2.96822	16.1997	5.2275	2.4483	0.816524	-	NN-NN
C05D9.7	X	1118071	1118465	30	151	128	1.04761	5.71533	3.37939	2.44774	1.68967	-	NN-NN
cdc-48.3	I	8035312	8035481	108	543	335	3.77138	20.5525	8.8445	2.44615	1.22969	-	NN-NN
pqn-31	V	9109678	9109759	66	331	539	2.30473	12.5283	14.2304	2.44252	2.62631	+	gt-ag
dpf-2	X	14836947	14837738	28	140	282	0.977765	5.29898	7.44522	2.43815	2.92875	+	gt-ag
ist-1	X	7133123	7133536	28	140	59	0.977765	5.29898	1.55769	2.43815	0.671846	+	gt-ag
ugt-54	IV	10763097	10763736	57	285	272	1.99045	10.7872	7.18121	2.43815	1.85113	+	gt-ag
ZK1193.2	X	413688	414427	16	80	151	0.558723	3.02799	3.98663	2.43815	2.83496	-	NN-NN
F47E1.2	X	9059214	9059457	33	165	26	1.15237	6.24522	0.686439	2.43815	-0.747396	+	gt-ag
Y69H2.7	V	18693541	18695530	37	185	138	1.29205	7.00222	3.64341	2.43815	1.49563	+	gt-ag
unc-38	I	4898252	4898924	19	95	61	0.663484	3.59573	1.61049	2.43815	1.27937	-	NN-NN
Y105C5A.15	IV	15721055	15721601	20	100	218	0.698404	3.78498	5.75553	2.43815	3.04281	+	gt-ag
F15B9.8	V	12990293	12991582	42	210	554	1.46665	7.94847	14.6264	2.43815	3.31798	+	gt-ag
F22G12.5	I	13175495	13177232	27	135	98	0.942845	5.10973	2.58735	2.43815	1.45638	+	gt-ag
acr-18	V	15551414	15551538	26	130	24	0.907925	4.92048	0.633636	2.43815	-0.518919	-	NN-NN
Y41E3.22	IV	14950887	14953925	24	120	340	0.838084	4.54198	8.97651	2.43815	3.42099	+	gt-ag
trpp-12	X	2409776	2410097	24	120	117	0.838084	4.54198	3.08897	2.43815	1.88196	+	gt-ag
mlt-7	II	4393084	4397903	452	2258	2502	15.7839	85.4649	66.0565	2.43688	2.06525	+	gt-ag
T25E4.1	II	5578425	5578793	368	1837	3765	12.8506	69.5302	99.4016	2.4358	2.95143	+	gt-ag
dre-1	V	6536169	6536286	72	359	703	2.51425	13.5881	18.5602	2.43414	2.88401	-	NN-NN
frm-8	III	3204280	3204725	58	289	80	2.02537	10.9386	2.11212	2.43317	0.0605053	-	NN-NN
twk-33	V	17710317	17710461	46	229	307	1.60633	8.66761	8.10526	2.43187	2.33509	-	NN-NN
W03G11.4	X	12079541	12080200	87	433	216	3.03806	16.389	5.70272	2.43151	0.908502	-	NN-NN
Y67D2.4	III	1536769	1537926	42	209	58	1.46665	7.91062	1.53129	2.43127	0.0622217	+	gt-ag
pix-1	X	13729791	13731311	41	204	153	1.43173	7.72137	4.03943	2.4311	1.49639	+	gt-ag
bath-39	V	13460198	13461084	17	84	95	0.593643	3.17939	2.50814	2.42108	2.07895	+	gt-ag
acl-4	X	2069588	2069690	77	380	309	2.68885	14.3829	8.15806	2.4193	1.60123	-	NN-NN
C45E5.4	IV	5736596	5736829	61	301	322	2.13013	11.3928	8.50128	2.41911	1.99674	+	gt-ag
nhr-228	V	2283250	2284196	15	74	105	0.523803	2.80089	2.77216	2.41879	2.40391	+	gt-ag
F11C7.6	X	17401856	17402253	15	74	10	0.523803	2.80089	0.264015	2.41879	-0.988404	+	gt-ag
sqrd-1	IV	14221316	14221590	29	143	61	1.01269	5.41253	1.61049	2.41812	0.669314	+	gt-ag
Y50D4A.4	V	1185148	1186333	26	128	93	0.907925	4.84478	2.45534	2.41579	1.43528	-	NN-NN
M03F4.6	X	4966348	4966638	38	187	287	1.32697	7.07792	7.57723	2.41519	2.51354	-	NN-NN
acy-1	III	4722496	4724697	63	310	211	2.19997	11.7335	5.57071	2.41507	1.34038	+	gt-ag
num-1	V	20832533	20833093	12	59	92	0.419042	2.23314	2.42894	2.41391	2.53516	+	gt-ag
kcnl-2	I	8199697	8199817	12	59	69	0.419042	2.23314	1.8217	2.41391	2.12012	+	gt-ag
bcl-11	V	6356743	6357675	35	172	270	1.22221	6.51017	7.1284	2.41321	2.54409	+	gt-ag
F55B11.2	IV	14422640	14422769	34	167	183	1.18729	6.32092	4.83147	2.41247	2.0248	-	NN-NN
K02A2.5	II	7411410	7411799	11	54	148	0.384122	2.04389	3.90742	2.41168	3.34658	-	NN-NN
lsl-1	I	9902267	9902431	76	373	414	2.65393	14.118	10.9302	2.41133	2.04212	+	gt-ag
sdpn-1	X	7992582	7992737	73	358	645	2.54917	13.5502	17.029	2.41022	2.73989	-	NN-NN
unc-58	X	10107793	10109183	31	152	137	1.08253	5.75318	3.617	2.40996	1.74039	-	NN-NN
T09B9.5	X	9779733	9780127	10	49	11	0.349202	1.85464	0.290416	2.40901	-0.265938	+	gt-ag
rab-37	X	4231210	4235756	20	98	45	0.698404	3.70928	1.18807	2.40901	0.766483	-	NN-NN
C06G3.6	IV	7017866	7018475	40	196	169	1.39681	7.41857	4.46185	2.40901	1.67551	+	gt-ag
mam-3	IV	13434440	13435180	19	93	81	0.663484	3.52004	2.13852	2.40746	1.68848	-	NN-NN
C08H9.1	II	9876566	9876735	19	93	32	0.663484	3.52004	0.844848	2.40746	0.348631	+	gt-ag
tps-1	X	17469241	17469354	47	230	288	1.64125	8.70546	7.60363	2.40713	2.21189	-	NN-NN
reps-1	V	18986984	18987428	27	132	191	0.942845	4.99618	5.04268	2.40573	2.4191	-	NN-NN
nhr-84	V	15877096	15877804	53	259	194	1.85077	9.80311	5.12189	2.40511	1.46855	-	NN-NN
T17H7.7	III	756854	757536	68	332	633	2.37457	12.5661	16.7121	2.4038	2.81516	-	NN-NN
R09F10.3	X	8296006	8296079	59	288	196	2.06029	10.9008	5.17469	2.40351	1.32862	+	gt-ag
T06D8.10	II	11245765	11245948	48	234	536	1.67617	8.85686	14.1512	2.40163	3.07768	-	NN-NN
tra-2	II	6962191	6962354	24	117	38	0.838084	4.42843	1.00326	2.40163	0.259523	-	NN-NN
tbc-17	II	12717342	12717825	103	502	221	3.59678	19.0006	5.83473	2.40127	0.69796	+	gt-ag
unc-2	X	2723461	2724083	23	112	218	0.803164	4.23918	5.75553	2.40002	2.84118	-	NN-NN
dop-1	X	4412456	4413279	23	112	73	0.803164	4.23918	1.92731	2.40002	1.26282	-	NN-NN
Y4C6B.2	IV	5343499	5343585	45	219	306	1.57141	8.28912	8.07886	2.39916	2.36209	+	gt-ag
F10D11.6	I	8445923	8446210	364	1766	3649	12.7109	66.8428	96.339	2.3947	2.92205	-	NN-NN
Y111B2A.10	III	12598165	12598427	60	291	222	2.09521	11.0143	5.86113	2.39421	1.48408	-	NN-NN
ZK688.9	III	7881438	7881521	39	189	141	1.36189	7.15362	3.72261	2.39307	1.45071	-	NN-NN
C34C12.7	III	3485281	3485647	26	126	82	0.907925	4.76908	2.16492	2.39307	1.25367	-	NN-NN
hgap-1	I	701863	702249	36	174	124	1.25713	6.58587	3.27378	2.38924	1.38083	-	NN-NN
R05A10.2	IV	14177451	14177985	65	314	572	2.26981	11.8849	15.1017	2.38848	2.73406	+	gt-ag
vps-53	III	9755406	9755568	41	198	143	1.43173	7.49427	3.77541	2.38803	1.39888	-	NN-NN
F44E2.7	III	8847403	8848167	35	169	242	1.22221	6.39662	6.38916	2.38782	2.38614	-	NN-NN
cyp-32A1	V	7782528	7782606	11	53	125	0.384122	2.00604	3.30019	2.38471	3.10291	+	gt-ag
Y43E12A.2	IV	10983738	10984460	66	318	561	2.30473	12.0362	14.8112	2.38471	2.68402	+	gt-ag
trx-3	IV	4487142	4487995	137	660	1015	4.78407	24.9809	26.7975	2.38452	2.48579	+	gt-ag
Y56A3A.7	III	11939181	11941165	16	77	133	0.558723	2.91444	3.5114	2.38301	2.65184	-	NN-NN
col-91	III	8263161	8263489	249	1198	2764	8.69513	45.3441	72.9737	2.38264	3.0691	-	NN-NN
Y87G2A.1	I	13519052	13520250	36	173	286	1.25713	6.54802	7.55083	2.38093	2.5865	+	gt-ag
twk-46	V	19065780	19066839	36	173	93	1.25713	6.54802	2.45534	2.38093	0.965792	+	gt-ag
K07C5.3	V	10344564	10344659	41	197	127	1.43173	7.45642	3.35299	2.38073	1.22769	+	gt-ag
cul-3	V	177463	177579	10	48	151	0.349202	1.81679	3.98663	2.37926	3.51303	+	gt-ag
acd-3	X	14851738	14852071	10	48	78	0.349202	1.81679	2.05932	2.37926	2.56003	+	gt-ag
F20D6.5	V	8162030	8163549	10	48	66	0.349202	1.81679	1.7425	2.37926	2.31902	+	gt-ag
arrd-26	IV	2067421	2068637	10	48	64	0.349202	1.81679	1.6897	2.37926	2.27463	+	gt-ag
Y116F11B.2	V	19798773	19799037	15	72	25	0.523803	2.72519	0.660037	2.37926	0.333524	-	NN-NN
trx-3	IV	4488060	4488175	165	792	1066	5.76183	29.9771	28.144	2.37926	2.28823	+	gt-ag
ppfr-1	I	9368106	9368919	20	96	121	0.698404	3.63358	3.19458	2.37926	2.19349	-	NN-NN
nas-8	IV	7116127	7116978	25	120	114	0.873005	4.54198	3.00977	2.37926	1.78559	+	gt-ag
F55A11.6	V	11781601	11781814	86	412	403	3.00314	15.5941	10.6398	2.37646	1.82493	+	gt-ag
K03B4.4	V	4683982	4684704	52	249	77	1.81585	9.42461	2.03291	2.37579	0.162905	+	gt-ag
Y71A12C.2	I	14046882	14047152	33	158	123	1.15237	5.98027	3.24738	2.37561	1.49468	-	NN-NN
egg-5	I	4169174	4169251	31	148	212	1.08253	5.60178	5.59712	2.37148	2.37028	-	NN-NN
C45E5.4	IV	5735150	5736031	75	358	536	2.61901	13.5502	14.1512	2.37122	2.43383	+	gt-ag
C06H5.8	V	17921054	17921392	13	62	62	0.453962	2.34669	1.63689	2.36998	1.85031	+	gt-ag
wdfy-3	IV	12671230	12671550	52	248	174	1.81585	9.38676	4.59386	2.36998	1.33906	+	gt-ag
sue-1	I	7360746	7360986	26	124	274	0.907925	4.69338	7.23401	2.36998	2.99415	-	NN-NN
gar-2	III	6315419	6317712	26	124	137	0.907925	4.69338	3.617	2.36998	1.99415	+	gt-ag
osm-7	III	13577564	13577683	69	329	368	2.40949	12.4526	9.71575	2.36965	2.0116	+	gt-ag
pash-1	I	10598800	10598926	30	143	96	1.04761	5.41253	2.53454	2.36921	1.27463	+	gt-ag
ttn-1	V	6191105	6191688	17	81	163	0.593643	3.06584	4.30344	2.36861	2.85782	-	NN-NN
F31D4.8	V	20867473	20868144	177	843	469	6.18087	31.9074	12.3823	2.36801	1.0024	-	NN-NN
tag-53	X	14713837	14714183	96	457	238	3.35234	17.2974	6.28355	2.36731	0.906413	+	gt-ag
xpo-3	IV	7919952	7922011	50	238	242	1.74601	9.00826	6.38916	2.36719	1.87157	-	NN-NN
agt-1	IV	13368721	13368990	120	571	659	4.19042	21.6123	17.3986	2.36668	2.0538	-	NN-NN
F31A3.5	X	17560265	17561284	37	176	112	1.29205	6.66157	2.95697	2.3662	1.19446	-	NN-NN
F20D6.5	V	8163667	8163974	37	176	89	1.29205	6.66157	2.34973	2.3662	0.862838	+	gt-ag
M04B2.2	IV	11529691	11530128	12	57	66	0.419042	2.15744	1.7425	2.36415	2.05599	+	gt-ag
lir-3	II	11184069	11184515	12	57	56	0.419042	2.15744	1.47848	2.36415	1.81895	-	NN-NN
bus-19	V	12880345	12880424	94	444	416	3.2825	16.8053	10.983	2.35605	1.74241	+	gt-ag
rbc-1	X	14621372	14621664	122	576	750	4.26026	21.8015	19.8011	2.35541	2.21657	+	gt-ag
C45E5.4	IV	5736265	5736502	96	453	640	3.35234	17.146	16.897	2.35463	2.33352	+	gt-ag
ceh-19	IV	7953804	7954500	14	66	128	0.488883	2.49809	3.37939	2.35327	2.7892	-	NN-NN
inpp-1	IV	10772290	10773711	14	66	19	0.488883	2.49809	0.501628	2.35327	0.0371307	-	NN-NN
exc-5	IV	8803016	8803964	49	231	200	1.71109	8.74331	5.2803	2.35327	1.6257	-	NN-NN
clip-1	III	9264290	9264864	118	556	457	4.12058	21.0445	12.0655	2.35252	1.54997	-	NN-NN
pqn-26	I	8776788	8777445	51	240	502	1.78093	9.08396	13.2535	2.35069	2.89568	-	NN-NN
osm-9	IV	3556567	3557290	27	127	244	0.942845	4.80693	6.44196	2.35002	2.77241	-	NN-NN
sos-1	V	4517811	4518431	67	315	465	2.33965	11.9227	12.2767	2.34934	2.39156	-	NN-NN
C53D5.1	I	295850	302595	30	141	149	1.04761	5.33683	3.93382	2.34889	1.90884	+	gt-ag
amt-3	II	8367906	8369032	30	141	13	1.04761	5.33683	0.343219	2.34889	-1.60989	-	NN-NN
tiar-2	II	12769167	12769257	20	94	119	0.698404	3.55789	3.14178	2.34889	2.16945	+	gt-ag
Y92H12A.5	I	1504808	1506880	43	202	133	1.50157	7.64567	3.5114	2.34817	1.22558	-	NN-NN
T17A3.2	III	136813	137598	46	216	139	1.60633	8.17557	3.66981	2.34755	1.19194	+	gt-ag
F28C10.3	X	533017	533701	13	61	45	0.453962	2.30884	1.18807	2.34652	1.38797	-	NN-NN
klp-13	X	5990342	5990606	13	61	18	0.453962	2.30884	0.475227	2.34652	0.0660434	+	gt-ag
let-19	II	8781117	8781191	65	305	174	2.26981	11.5442	4.59386	2.34652	1.01713	+	gt-ag
nsun-5	II	14975818	14976614	106	497	167	3.70154	18.8114	4.40905	2.34541	0.252342	+	gt-ag
Y82E9BR.19	III	1490304	1491414	32	150	206	1.11745	5.67748	5.43871	2.34504	2.28306	-	NN-NN
pho-8	V	11834489	11834676	16	75	135	0.558723	2.83874	3.5642	2.34504	2.67337	+	gt-ag
Y45G5AM.6	V	4150984	4152103	38	178	211	1.32697	6.73727	5.57071	2.34403	2.06973	-	NN-NN
ham-1	IV	12542316	12542394	57	267	484	1.99045	10.1059	12.7783	2.34403	2.68253	+	gt-ag
nrde-1	III	3716948	3717117	57	267	133	1.99045	10.1059	3.5114	2.34403	0.818951	+	gt-ag
nfya-2	I	11227576	11232560	25	117	95	0.873005	4.42843	2.50814	2.34273	1.52256	+	gt-ag
ugt-53	V	2849927	2850472	25	117	12	0.873005	4.42843	0.316818	2.34273	-1.46234	+	gt-ag
tps-1	X	17472175	17472347	92	430	250	3.21266	16.2754	6.60037	2.34086	1.03878	-	NN-NN
Y56A3A.6	III	11872844	11873585	52	243	135	1.81585	9.19751	3.5642	2.3406	0.972934	-	NN-NN
Y95B8A.2	I	940583	941232	377	1760	3963	13.1649	66.6157	104.629	2.33916	2.99051	+	gt-ag
Y41E3.7	IV	15014389	15015255	12	56	20	0.419042	2.11959	0.52803	2.33862	0.333524	+	gt-ag
ncx-3	IV	10721149	10721324	15	70	123	0.523803	2.64949	3.24738	2.33862	2.63218	+	gt-ag
nhr-47	V	5506993	5507689	15	70	118	0.523803	2.64949	3.11538	2.33862	2.57231	+	gt-ag
rin-1	V	14785648	14786002	30	140	358	1.04761	5.29898	9.45173	2.33862	3.17348	-	NN-NN
gbb-1	X	2966756	2967108	36	168	123	1.25713	6.35877	3.24738	2.33862	1.36915	+	gt-ag
sfxn-1.3	V	15727269	15727542	21	98	21	0.733324	3.70928	0.554431	2.33862	-0.403442	+	gt-ag
F28E10.1	IV	4585983	4586300	24	112	83	0.838084	4.23918	2.19132	2.33862	1.38664	+	gt-ag
B0554.5	V	424676	424771	27	126	81	0.942845	4.76908	2.13852	2.33862	1.18152	+	gt-ag
ZK816.1	X	3359171	3360085	27	126	35	0.942845	4.76908	0.924052	2.33862	-0.0290463	+	gt-ag
del-5	X	11006754	11007265	35	163	80	1.22221	6.16952	2.11212	2.33567	0.789203	-	NN-NN
let-391	I	6040464	6040665	29	135	70	1.01269	5.10973	1.8481	2.33506	0.86786	+	gt-ag
adt-1	X	12680625	12681253	72	335	710	2.51425	12.6797	18.7451	2.33432	2.89831	+	gt-ag
sax-2	III	5110185	5110683	37	172	246	1.29205	6.51017	6.49477	2.33304	2.32962	+	gt-ag
T28C12.4	V	6323900	6324138	130	604	159	4.53962	22.8613	4.19784	2.33226	-0.112927	+	gt-ag
C53D6.7	IV	9035374	9035671	90	418	386	3.14282	15.8212	10.191	2.33173	1.69716	-	NN-NN
smg-6	III	2480812	2481898	14	65	67	0.488883	2.46024	1.7689	2.33124	1.85529	+	gt-ag
nhr-210	V	518460	518738	64	297	188	2.23489	11.2414	4.96348	2.33055	1.15115	-	NN-NN
lrch-1	X	6210906	6211564	83	385	272	2.89838	14.5722	7.18121	2.3299	1.30898	-	NN-NN
bcc-1	IV	11087024	11087658	94	436	398	3.2825	16.5025	10.5078	2.32982	1.67859	-	NN-NN
F54A3.2	II	2246567	2246800	33	153	204	1.15237	5.79103	5.3859	2.32922	2.22459	+	gt-ag
vps-41	X	5284117	5285946	22	102	73	0.768244	3.86068	1.92731	2.32922	1.32695	+	gt-ag
acr-23	V	3657815	3657965	19	88	73	0.663484	3.33079	1.92731	2.32773	1.53846	-	NN-NN
T14G11.1	X	2689269	2690040	108	500	472	3.77138	18.9249	12.4615	2.32712	1.72431	+	gt-ag
cut-4	II	10439021	10439102	54	250	309	1.88569	9.46246	8.15806	2.32712	2.11313	+	gt-ag
catp-3	V	8079627	8079706	97	449	628	3.38726	16.9946	16.5801	2.32688	2.29127	+	gt-ag
Y64G10A.7	IV	14292068	14296287	51	236	266	1.78093	8.93256	7.0228	2.32644	1.97942	+	gt-ag
dpy-6	X	8450809	8451343	271	1254	861	9.46337	47.4637	22.7317	2.3264	1.26428	-	NN-NN
pxn-2	X	10972322	10972536	79	365	613	2.75869	13.8152	16.1841	2.3242	2.55252	-	NN-NN
Y57G11C.42	IV	14735042	14736752	13	60	44	0.453962	2.27099	1.16167	2.32268	1.35555	+	gt-ag
lgx-1	X	5536416	5536499	26	120	62	0.907925	4.54198	1.63689	2.32268	0.850315	-	NN-NN
athp-2	II	4345693	4346747	49	226	246	1.71109	8.55406	6.49477	2.3217	1.92436	+	gt-ag
H01M10.1	X	2578790	2579298	18	83	58	0.628563	3.14154	1.53129	2.32134	1.28461	-	NN-NN
pde-1	I	13312220	13312893	36	166	73	1.25713	6.28307	1.92731	2.32134	0.616458	-	NN-NN
F02D8.1	V	14973647	14973851	36	166	57	1.25713	6.28307	1.50489	2.32134	0.259523	-	NN-NN
epc-1	III	12601119	12602216	164	756	705	5.72691	28.6145	18.6131	2.32092	1.70049	-	NN-NN
F55D12.2	I	7892959	7893265	84	387	875	2.9333	14.6479	23.1013	2.3201	2.97738	+	gt-ag
C34B4.2	V	13087649	13088381	33	152	190	1.15237	5.75318	5.01628	2.31976	2.12202	+	gt-ag
cle-1	I	8706401	8707074	43	198	119	1.50157	7.49427	3.14178	2.31932	1.06511	-	NN-NN
E01B7.1	V	17931541	17932188	10	46	55	0.349202	1.74109	1.45208	2.31786	2.05599	+	gt-ag
C35D10.12	III	4873287	4873447	10	46	47	0.349202	1.74109	1.24087	2.31786	1.82922	-	NN-NN
C44E4.1	I	4630175	4631501	75	345	238	2.61901	13.0582	6.28355	2.31786	1.26256	-	NN-NN
ptr-5	X	17325760	17325839	15	69	56	0.523803	2.61164	1.47848	2.31786	1.49702	+	gt-ag
irld-6	V	10755811	10755964	15	69	13	0.523803	2.61164	0.343219	2.31786	-0.609893	-	NN-NN
pac-1	III	8497252	8497629	20	92	234	0.698404	3.48219	6.17795	2.31786	3.14499	+	gt-ag
H10D18.5	V	3818854	3820094	20	92	136	0.698404	3.48219	3.5906	2.31786	2.36209	-	NN-NN
acox-5	III	9587171	9587623	67	308	449	2.33965	11.6578	11.8543	2.31692	2.34104	-	NN-NN
egl-9	V	10474187	10474812	57	262	283	1.99045	9.91666	7.47162	2.31676	1.90833	+	gt-ag
Y39C12A.9	IV	12258036	12258496	42	193	89	1.46665	7.30502	2.34973	2.31637	0.679974	-	NN-NN
dkf-2	V	16766255	16766359	22	101	76	0.768244	3.82283	2.00651	2.31501	1.38505	+	gt-ag
E04F6.6	II	7197754	7197909	95	436	421	3.31742	16.5025	11.115	2.31455	1.74438	-	NN-NN
C33D12.2	X	3042169	3042314	34	156	94	1.18729	5.90458	2.48174	2.31417	1.06368	-	NN-NN
nhr-88	II	2979002	2979575	51	234	674	1.78093	8.85686	17.7946	2.31417	3.32074	+	gt-ag
Y54G2A.13	IV	2814894	2814985	17	78	29	0.593643	2.95229	0.765643	2.31417	0.367076	-	NN-NN
adt-1	X	12679211	12679384	12	55	242	0.419042	2.08174	6.38916	2.31262	3.93046	+	gt-ag
F36G9.3	V	15959015	15959159	12	55	126	0.419042	2.08174	3.32659	2.31262	2.98888	+	gt-ag
Y43E12A.2	IV	10983340	10983453	67	307	400	2.33965	11.6199	10.5606	2.31223	2.17433	+	gt-ag
rig-3	X	6859645	6860028	62	284	210	2.16505	10.7494	5.54431	2.31178	1.35661	+	gt-ag
ppfr-1	I	9368106	9369867	45	206	120	1.57141	7.79707	3.16818	2.31087	1.0116	-	NN-NN
C33G3.6	X	14082851	14083036	40	183	90	1.39681	6.92652	2.37613	2.31	0.766483	-	NN-NN
lin-66	IV	13890144	13890263	35	160	103	1.22221	6.05597	2.71935	2.30887	1.15378	+	gt-ag
F08F3.1	V	5446288	5447011	63	288	403	2.19997	10.9008	10.6398	2.30887	2.27391	+	gt-ag
gem-1	X	13374237	13374653	44	201	107	1.53649	7.60782	2.82496	2.30785	0.878594	-	NN-NN
nhr-64	I	3108013	3108202	23	105	111	0.803164	3.97423	2.93057	2.30691	1.86741	+	gt-ag
F43D9.1	III	10493738	10493916	23	105	81	0.803164	3.97423	2.13852	2.30691	1.41285	+	gt-ag
snpc-3.1	IV	5485027	5485275	16	73	63	0.558723	2.76304	1.66329	2.30605	1.57384	-	NN-NN
npr-31	II	7146347	7146968	16	73	12	0.558723	2.76304	0.316818	2.30605	-0.818479	+	gt-ag
phf-14	V	17875040	17876670	82	374	404	2.86346	14.1558	10.6662	2.30557	1.89722	+	gt-ag
W05F2.4	I	3383215	3383956	50	228	400	1.74601	8.62976	10.5606	2.30526	2.59656	-	NN-NN
egl-19	IV	7408306	7408830	25	114	87	0.873005	4.31488	2.29693	2.30526	1.39565	+	gt-ag
age-1	II	11520680	11521118	27	123	94	0.942845	4.65553	2.48174	2.30385	1.39626	-	NN-NN
dod-18	I	8019830	8020101	27	123	60	0.942845	4.65553	1.58409	2.30385	0.748561	-	NN-NN
F49C12.6	IV	9307992	9308097	31	141	119	1.08253	5.33683	3.14178	2.30158	1.53718	-	NN-NN
unc-41	V	9970171	9970415	11	50	117	0.384122	1.89249	3.08897	2.30065	3.00749	-	NN-NN
mgl-3	IV	5446409	5446713	11	50	93	0.384122	1.89249	2.45534	2.30065	2.67629	+	gt-ag
npr-17	III	7992036	7992356	11	50	54	0.384122	1.89249	1.42568	2.30065	1.89201	-	NN-NN
R03A10.5	X	15447450	15448166	22	100	63	0.768244	3.78498	1.66329	2.30065	1.11441	+	gt-ag
nrx-1	V	10832348	10835531	13	59	139	0.453962	2.23314	3.66981	2.29843	3.01506	+	gt-ag
F21A3.3	V	15519351	15519474	58	263	639	2.02537	9.95451	16.8706	2.29716	3.05825	+	gt-ag
ung-1	III	11971739	11973313	55	249	229	1.92061	9.42461	6.04594	2.29487	1.6544	-	NN-NN
dph-2	II	10703497	10712150	110	498	330	3.84122	18.8492	8.71249	2.29487	1.18152	-	NN-NN
del-9	X	3614938	3615308	19	86	176	0.663484	3.25509	4.64666	2.29456	2.80806	-	NN-NN
sphk-1	II	8700881	8700969	19	86	51	0.663484	3.25509	1.34648	2.29456	1.02106	-	NN-NN
hlh-11	III	9622202	9622480	145	656	802	5.06343	24.8295	21.174	2.29387	2.06411	+	gt-ag
C05A9.2	X	10843640	10844533	65	294	213	2.26981	11.1279	5.62352	2.29353	1.3089	-	NN-NN
met-1	I	4254510	4255395	25	113	132	0.873005	4.27703	3.485	2.29255	1.9971	+	gt-ag
Y17G9A.2	IV	4854917	4855217	25	113	38	0.873005	4.27703	1.00326	2.29255	0.200629	-	NN-NN
grsp-1	V	19610787	19611961	27	122	224	0.942845	4.61768	5.91393	2.29208	2.64903	+	gt-ag
C26D10.6	II	8350971	8351050	27	122	82	0.942845	4.61768	2.16492	2.29208	1.19922	-	NN-NN
hmit-1.2	V	18525122	18525355	27	122	15	0.942845	4.61768	0.396022	2.29208	-1.25144	+	gt-ag
cex-2	II	7834362	7834477	58	262	128	2.02537	9.91666	3.37939	2.29167	0.738577	-	NN-NN
nhr-172	V	7509778	7509861	37	167	19	1.29205	6.32092	0.501628	2.29048	-1.36497	+	gt-ag
vab-10	I	11777698	11777952	49	221	284	1.71109	8.36481	7.49802	2.28942	2.1316	-	NN-NN
rbc-2	III	2520607	2522292	63	284	425	2.19997	10.7494	11.2206	2.28869	2.3506	-	NN-NN
F10D7.5	X	17386088	17386873	30	135	182	1.04761	5.10973	4.80507	2.28615	2.19746	-	NN-NN
ZK287.1	V	9668986	9669717	14	63	126	0.488883	2.38454	3.32659	2.28615	2.76648	+	gt-ag
che-10	II	4636570	4637183	14	63	69	0.488883	2.38454	1.8217	2.28615	1.89773	-	NN-NN
T20F5.6	I	3922868	3923575	60	270	249	2.09521	10.2195	6.57397	2.28615	1.64967	-	NN-NN
Y38C1AA.12	IV	193155	193894	18	81	75	0.628563	3.06584	1.98011	2.28615	1.65545	+	gt-ag
wht-5	IV	12338244	12338403	18	81	52	0.628563	3.06584	1.37288	2.28615	1.12707	+	gt-ag
trt-1	I	8768652	8768738	116	522	149	4.05074	19.7576	3.93382	2.28615	-0.0422543	+	gt-ag
C05B5.4	III	9994061	9994575	56	252	399	1.95553	9.53816	10.5342	2.28615	2.42945	+	gt-ag
mab-9	II	520255	520392	20	90	11	0.698404	3.40649	0.290416	2.28615	-1.26594	+	gt-ag
cit-1.1	III	8006588	8007044	76	342	303	2.65393	12.9446	7.99965	2.28615	1.5918	-	NN-NN
max-1	V	13103216	13103549	24	108	137	0.838084	4.08778	3.617	2.28615	2.10963	-	NN-NN
F47B7.7	X	3780221	3780478	151	678	597	5.27295	25.6622	15.7617	2.28296	1.57974	-	NN-NN
toe-2	II	6517928	6518008	50	224	209	1.74601	8.47836	5.51791	2.27972	1.66006	-	NN-NN
tmc-1	X	1172781	1172857	25	112	129	0.873005	4.23918	3.40579	2.27972	1.96393	+	gt-ag
sax-2	III	5124279	5125179	25	112	70	0.873005	4.23918	1.8481	2.27972	1.08198	+	gt-ag
F18H3.1	X	13520790	13521013	23	103	163	0.803164	3.89853	4.30344	2.27916	2.42172	+	gt-ag
abl-1	X	10617014	10617185	57	255	233	1.99045	9.65171	6.15155	2.27769	1.62785	-	NN-NN
C32D5.10	II	6350499	6350572	55	246	150	1.92061	9.31106	3.96022	2.27738	1.04402	-	NN-NN
pqn-62	X	5197838	5197964	17	76	170	0.593643	2.87659	4.48825	2.27669	2.91849	+	gt-ag
B0205.8	I	10729050	10729775	30	134	95	1.04761	5.07188	2.50814	2.27542	1.25952	-	NN-NN
sulp-2	X	5597139	5597579	28	125	234	0.977765	4.73123	6.17795	2.27466	2.65957	-	NN-NN
unc-7	X	15127175	15127380	28	125	196	0.977765	4.73123	5.17469	2.27466	2.40391	-	NN-NN
K07E8.6	II	637776	638214	41	183	181	1.43173	6.92652	4.77867	2.27437	1.73885	-	NN-NN
lagr-1	I	13728549	13731919	78	348	165	2.72377	13.1717	4.35625	2.27377	0.677478	-	NN-NN
Y43E12A.2	IV	10982185	10982852	76	339	826	2.65393	12.8311	21.8076	2.27344	3.03863	+	gt-ag
gfi-3	X	14481008	14481198	53	236	14	1.85077	8.93256	0.369621	2.27095	-2.32401	+	gt-ag
cyld-1	III	9909316	9909597	18	80	160	0.628563	3.02799	4.22424	2.26823	2.74856	-	NN-NN
K02E10.1	X	2497800	2499298	59	262	195	2.06029	9.91666	5.14829	2.26701	1.32125	+	gt-ag
rpom-1	I	14559140	14560037	75	333	221	2.61901	12.604	5.83473	2.26679	1.15564	-	NN-NN
K04F1.9	V	1665407	1665481	424	1881	1737	14.8062	71.1956	45.8594	2.26559	1.63102	+	gt-ag
sad-1	X	13488172	13488804	30	133	185	1.04761	5.03403	4.88428	2.26462	2.22105	-	NN-NN
dct-17	V	13727920	13728700	104	461	598	3.6317	17.4488	15.7881	2.26441	2.12012	-	NN-NN
unc-10	X	7276345	7276445	63	279	274	2.19997	10.5601	7.23401	2.26307	1.71731	-	NN-NN
nhr-205	V	10081385	10081563	21	93	27	0.733324	3.52004	0.71284	2.26307	-0.0408718	-	NN-NN
daf-16	I	10763706	10764357	155	686	471	5.41263	25.965	12.4351	2.26217	1.20002	+	gt-ag
Y75B8A.6	III	12127201	12129028	106	469	309	3.70154	17.7516	8.15806	2.26175	1.1401	-	NN-NN
shl-1	IV	6380536	6380804	26	115	236	0.907925	4.35273	6.23075	2.26128	2.77876	-	NN-NN
dom-3	I	5004246	5004345	19	84	203	0.663484	3.17939	5.3595	2.26062	3.01397	+	gt-ag
T03F7.7	V	11312829	11313060	55	243	309	1.92061	9.19751	8.15806	2.25968	2.08666	+	gt-ag
lgc-30	IV	936728	937061	12	53	121	0.419042	2.00604	3.19458	2.25918	2.93046	+	gt-ag
lgc-30	IV	930310	936642	12	53	79	0.419042	2.00604	2.08572	2.25918	2.31538	+	gt-ag
mdt-17	V	20264804	20266292	118	521	469	4.12058	19.7198	12.3823	2.25872	1.58736	-	NN-NN
Y51H4A.25	IV	16741671	16741747	17	75	241	0.593643	2.83874	6.36276	2.25758	3.42198	+	gt-ag
F20D6.8	V	8166315	8166563	22	97	79	0.768244	3.67143	2.08572	2.25671	1.44091	-	NN-NN
C02B8.6	X	8134948	8135692	32	141	97	1.11745	5.33683	2.56094	2.25578	1.19647	-	NN-NN
dmd-6	IV	14622090	14622509	84	370	181	2.9333	14.0044	4.77867	2.25529	0.704087	+	gt-ag
fbxa-129	V	17656475	17656605	47	207	68	1.64125	7.83492	1.7953	2.25512	0.129432	-	NN-NN
F28H6.6	X	14125343	14125528	10	44	118	0.349202	1.66539	3.11538	2.25373	3.15727	-	NN-NN
Y50D4B.4	V	1098613	1098873	10	44	25	0.349202	1.66539	0.660037	2.25373	0.918486	+	gt-ag
ZK721.3	X	8785791	8785876	10	44	24	0.349202	1.66539	0.633636	2.25373	0.859593	+	gt-ag
add-2	V	12012559	12013008	10	44	21	0.349202	1.66539	0.554431	2.25373	0.666947	-	NN-NN
H10D12.2	IV	6143670	6144016	10	44	17	0.349202	1.66539	0.448825	2.25373	0.362093	-	NN-NN
F57A8.4	V	10067698	10067934	35	154	59	1.22221	5.82888	1.55769	2.25373	0.349918	+	gt-ag
K09C4.10	X	3277038	3277122	20	88	81	0.698404	3.33079	2.13852	2.25373	1.61448	-	NN-NN
glb-10	II	6309024	6309158	25	110	374	0.873005	4.16348	9.87416	2.25373	3.4996	-	NN-NN
B0432.7	II	272528	272902	25	110	166	0.873005	4.16348	4.38265	2.25373	2.32774	-	NN-NN
let-611	I	6255758	6256230	101	444	99	3.52694	16.8053	2.61375	2.25243	-0.432297	+	gt-ag
C26E1.2	V	13305927	13306155	75	329	104	2.61901	12.4526	2.74576	2.24935	0.0681792	+	gt-ag
tba-8	X	9456015	9456093	13	57	198	0.453962	2.15744	5.2275	2.24868	3.52548	-	NN-NN
C31C9.6	II	13660062	13660389	13	57	57	0.453962	2.15744	1.50489	2.24868	1.72901	-	NN-NN
cdh-8	IV	353149	353962	13	57	40	0.453962	2.15744	1.05606	2.24868	1.21805	+	gt-ag
Y43F8A.5	V	19385226	19385835	42	184	123	1.46665	6.96437	3.24738	2.24747	1.14676	-	NN-NN
dpy-19	III	8661892	8661984	27	118	132	0.942845	4.46628	3.485	2.24398	1.88606	-	NN-NN
K12H6.12	II	2812560	2812666	27	118	85	0.942845	4.46628	2.24413	2.24398	1.25106	+	gt-ag
lgc-21	X	14067781	14067862	192	839	2201	6.70468	31.756	58.1097	2.24379	3.11554	-	NN-NN
sfa-1	IV	17108034	17108784	19	83	10	0.663484	3.14154	0.264015	2.24334	-1.32944	-	NN-NN
T24C12.3	X	2202415	2202499	49	214	32	1.71109	8.09987	0.844848	2.24298	-1.01815	-	NN-NN
dmd-6	IV	14619857	14622017	60	262	217	2.09521	9.91666	5.72912	2.24276	1.45122	+	gt-ag
pcaf-1	I	3517027	3517805	55	240	425	1.92061	9.08396	11.2206	2.24176	2.54652	+	gt-ag
B0001.2	IV	12147254	12147536	105	458	168	3.66662	17.3352	4.43545	2.24118	0.27463	-	NN-NN
slc-36.5	II	6875214	6875295	14	61	189	0.488883	2.30884	4.98988	2.23961	3.35145	-	NN-NN
W06A11.4	II	4056089	4056487	14	61	114	0.488883	2.30884	3.00977	2.23961	2.62209	+	gt-ag
rpoa-2	I	9281605	9281887	87	379	577	3.03806	14.3451	15.2337	2.23934	2.32604	-	NN-NN
lin-12	III	9067985	9069601	45	196	151	1.57141	7.41857	3.98663	2.23908	1.34311	-	NN-NN
ego-2	I	11406477	11408164	34	148	236	1.18729	5.60178	6.23075	2.23822	2.39174	-	NN-NN
fbxa-209	V	15424068	15424275	17	74	70	0.593643	2.80089	1.8481	2.23822	1.63838	-	NN-NN
Y53F4B.9	II	15009887	15010067	57	248	220	1.99045	9.38676	5.80833	2.23753	1.54503	-	NN-NN
C06A8.8	II	7769447	7769971	20	87	261	0.698404	3.29294	6.89079	2.23724	3.30254	-	NN-NN
Y47G6A.19	I	3528804	3529568	161	700	1456	5.62215	26.4949	38.4406	2.23652	2.77344	-	NN-NN
H24K24.4	V	909251	910654	98	426	531	3.42218	16.124	14.0192	2.23623	2.03442	+	gt-ag
unc-53	II	11078791	11080482	29	126	197	1.01269	4.76908	5.20109	2.23552	2.36063	-	NN-NN
mlp-1	III	5973401	5973548	64	278	271	2.23489	10.5223	7.1548	2.23517	1.67871	-	NN-NN
ztf-16	X	4810691	4810795	35	152	542	1.22221	5.75318	14.3096	2.23487	3.54942	-	NN-NN
F53A3.1	III	1939654	1940659	44	191	303	1.53649	7.22932	7.99965	2.23422	2.3803	-	NN-NN
suro-1	I	7874949	7875334	48	208	931	1.67617	7.87277	24.5798	2.2317	3.87423	-	NN-NN
rgr-1	III	9396699	9397860	36	156	44	1.25713	5.90458	1.16167	2.2317	-0.113935	+	gt-ag
hsp-43	X	6233597	6233861	36	156	25	1.25713	5.90458	0.660037	2.2317	-0.929511	-	NN-NN
R144.6	III	5004496	5004627	103	446	118	3.59678	16.881	3.11538	2.23063	-0.207299	-	NN-NN
D2096.6	IV	8368666	8368768	228	987	1521	7.9618	37.3578	40.1567	2.23024	2.33447	-	NN-NN
F11D5.1	X	3340395	3341113	80	346	276	2.79361	13.096	7.28681	2.22893	1.38315	+	gt-ag
Y43F8B.3	V	19514522	19514626	50	216	33	1.74601	8.17557	0.871249	2.22726	-1.0029	+	gt-ag
drn-1	II	5270689	5271049	60	259	319	2.09521	9.80311	8.42208	2.22614	2.00708	-	NN-NN
rom-4	IV	17009225	17010273	19	82	10	0.663484	3.10369	0.264015	2.22585	-1.32944	+	gt-ag
dnj-10	III	8631771	8631874	70	302	319	2.44441	11.4307	8.42208	2.22535	1.78469	+	gt-ag
flp-25	III	9364276	9365088	70	302	306	2.44441	11.4307	8.07886	2.22535	1.72466	+	gt-ag
C08B6.3	V	10110687	10110905	32	138	80	1.11745	5.22328	2.11212	2.22475	0.918486	-	NN-NN
faah-4	III	11906619	11906693	42	181	260	1.46665	6.85082	6.86439	2.22375	2.22661	-	NN-NN
ssl-1	III	12718792	12719442	139	599	513	4.85391	22.6721	13.544	2.2237	1.48043	+	gt-ag
Y73F8A.35	IV	15539568	15539697	13	56	94	0.453962	2.11959	2.48174	2.22314	2.45071	-	NN-NN
T11G6.3	IV	10853554	10853626	26	112	89	0.907925	4.23918	2.34973	2.22314	1.37185	-	NN-NN
Y46E12BR.1	II	15196793	15197592	36	155	200	1.25713	5.86673	5.2803	2.22243	2.07049	+	gt-ag
Y71H2AM.15	III	2751237	2751503	59	254	279	2.06029	9.61386	7.36602	2.22227	1.83804	-	NN-NN
K03H1.5	III	9934036	9934242	43	185	297	1.50157	7.00222	7.84124	2.22134	2.38461	+	gt-ag
nhr-5	IV	15404334	15404818	10	43	95	0.349202	1.62754	2.50814	2.22056	2.84449	+	gt-ag
Y58G8A.5	V	272170	272773	10	43	62	0.349202	1.62754	1.63689	2.22056	2.22883	-	NN-NN
ptr-13	II	11160582	11160680	20	86	170	0.698404	3.25509	4.48825	2.22056	2.68402	-	NN-NN
slo-1	V	18498843	18499582	20	86	44	0.698404	3.25509	1.16167	2.22056	0.734062	+	gt-ag
K12H6.2	II	2813483	2813761	27	116	138	0.942845	4.39058	3.64341	2.21932	1.9502	-	NN-NN
F22G12.5	I	13179355	13179892	17	73	86	0.593643	2.76304	2.27053	2.21859	1.93536	+	gt-ag
ZK1193.2	X	415099	415811	24	103	107	0.838084	3.89853	2.82496	2.21776	1.75306	-	NN-NN
Y11D7A.3	IV	9239276	9239692	93	399	135	3.24758	15.1021	3.5642	2.21731	0.134215	+	gt-ag
srap-1	II	11206866	11207002	111	476	669	3.87614	18.0165	17.6626	2.21663	2.188	+	gt-ag
ZK666.14	II	10494902	10495119	14	60	68	0.488883	2.27099	1.7953	2.21576	1.87667	+	gt-ag
srw-145	V	13937546	13937947	35	150	10	1.22221	5.67748	0.264015	2.21576	-2.2108	+	gt-ag
abl-1	X	10617014	10617782	25	107	170	0.873005	4.04993	4.48825	2.21384	2.36209	-	NN-NN
reps-1	V	18987486	18987614	54	231	160	1.88569	8.74331	4.22424	2.21309	1.1636	-	NN-NN
W09G3.1	I	13828805	13829213	54	231	127	1.88569	8.74331	3.35299	2.21309	0.830355	-	NN-NN
mocs-1	X	15438765	15439364	18	77	36	0.628563	2.91444	0.950454	2.21309	0.596558	-	NN-NN
tra-1	III	11175189	11175267	91	389	438	3.17774	14.7236	11.5639	2.21206	1.86355	-	NN-NN
fmi-1	V	13028945	13029241	30	128	240	1.04761	4.84478	6.33636	2.20934	2.59656	+	gt-ag
ekl-6	III	10066325	10066448	60	256	170	2.09521	9.68956	4.48825	2.20934	1.09906	+	gt-ag
R05H10.3	II	14880189	14881034	38	162	110	1.32697	6.13167	2.90416	2.20815	1.12999	+	gt-ag
lin-22	IV	3019998	3021856	84	358	412	2.9333	13.5502	10.8774	2.20772	1.89074	+	gt-ag
ckk-1	III	5645305	5649347	23	98	163	0.803164	3.70928	4.30344	2.20737	2.42172	+	gt-ag
lgc-21	X	14067086	14067195	58	247	692	2.02537	9.34891	18.2698	2.20661	3.17321	-	NN-NN
elt-1	IV	9616156	9616326	35	149	209	1.22221	5.63963	5.51791	2.20611	2.17463	+	gt-ag
T08G11.1	I	8907611	8907699	192	817	619	6.70468	30.9233	16.3425	2.20546	1.28539	-	NN-NN
ugt-45	IV	3750829	3750952	59	251	366	2.06029	9.50031	9.66295	2.20513	2.22961	-	NN-NN
deg-1	X	7765759	7765947	28	119	146	0.977765	4.50413	3.85462	2.20369	1.97903	+	gt-ag
2RSSE.1	II	15270973	15273043	32	136	125	1.11745	5.14758	3.30019	2.20369	1.56234	+	gt-ag
nhr-121	III	2450031	2450390	52	221	292	1.81585	8.36481	7.70924	2.20369	2.08594	-	NN-NN
F10G7.9	II	4703626	4703757	44	187	146	1.53649	7.07792	3.85462	2.20369	1.32695	-	NN-NN
Y52B11A.10	I	11045451	11046103	24	102	79	0.838084	3.86068	2.08572	2.20369	1.31538	+	gt-ag
mys-2	I	14126602	14126767	45	191	63	1.57141	7.22932	1.66329	2.2018	0.081985	+	gt-ag
F30A10.3	I	9494004	9494244	37	157	151	1.29205	5.94243	3.98663	2.20139	1.62551	-	NN-NN
F19C7.8	IV	4617305	4617388	29	123	114	1.01269	4.65553	3.00977	2.20076	1.57147	-	NN-NN
acd-1	I	4106137	4106456	87	369	100	3.03806	13.9666	2.64015	2.20076	-0.202529	+	gt-ag
col-90	III	7949691	7949792	1665	7057	15419	58.1421	267.106	407.085	2.19976	2.80767	+	gt-ag
Y48G1A.1	I	355817	356834	21	89	232	0.733324	3.36864	6.12515	2.19964	3.06222	+	gt-ag
F54A3.2	II	2246958	2248996	72	305	441	2.51425	11.5442	11.6431	2.19897	2.21127	+	gt-ag
H10D12.2	IV	6146673	6146801	17	72	99	0.593643	2.72519	2.61375	2.19869	2.13845	-	NN-NN
nhr-230	V	18846950	18848247	17	72	51	0.593643	2.72519	1.34648	2.19869	1.18152	+	gt-ag
Y39B6A.16	V	19099639	19099836	47	199	176	1.64125	7.53212	4.64666	2.19826	1.5014	-	NN-NN
C09G9.1	IV	8862485	8863849	206	872	541	7.19356	33.0051	14.2832	2.19791	0.989542	-	NN-NN
Y67D8A.2	IV	3230105	3230394	56	237	296	1.95553	8.97041	7.81484	2.19761	1.99866	+	gt-ag
ceh-27	V	11662731	11664168	13	55	144	0.453962	2.08174	3.80181	2.19715	3.06604	-	NN-NN
pig-1	IV	516351	517251	26	110	387	0.907925	4.16348	10.2174	2.19715	3.49231	-	NN-NN
C26B9.1	X	5347085	5347915	109	461	162	3.8063	17.4488	4.27704	2.19666	0.168224	+	gt-ag
B0361.4	III	7267904	7268178	22	93	136	0.768244	3.52004	3.5906	2.19595	2.22459	+	gt-ag
Y41C4A.9	III	11714780	11715875	41	173	195	1.43173	6.54802	5.14829	2.1933	1.84634	-	NN-NN
nhr-145	V	19087890	19088605	23	97	32	0.803164	3.67143	0.844848	2.19258	0.0729962	+	gt-ag
npr-31	II	7145894	7146118	14	59	11	0.488883	2.23314	0.290416	2.19151	-0.751365	+	gt-ag
R01H2.7	III	7036785	7036874	33	139	81	1.15237	5.26113	2.13852	2.19077	0.892014	-	NN-NN
feh-1	III	2559471	2560324	24	101	152	0.838084	3.82283	4.01303	2.18947	2.25952	+	gc-ag
F58G1.2	II	12918777	12918944	29	122	39	1.01269	4.61768	1.02966	2.18898	0.0239794	-	NN-NN
Y7A9A.1	IV	16200936	16201135	58	244	193	2.02537	9.23536	5.09549	2.18898	1.33103	+	gt-ag
col-115	IV	7988831	7989334	49	206	748	1.71109	7.79707	19.7483	2.18802	3.52874	+	gt-ag
T01D3.3	V	13710349	13710526	89	374	145	3.1079	14.1558	3.82822	2.18739	0.300734	+	gt-ag
kdin-1	IV	11042622	11042929	15	63	34	0.523803	2.38454	0.897651	2.18662	0.77713	+	gt-ag
nhr-48	X	15710562	15710826	46	193	168	1.60633	7.30502	4.43545	2.18512	1.46531	+	gt-ag
F53B1.8	X	2128684	2129770	47	197	53	1.64125	7.45642	1.39928	2.18369	-0.23011	-	NN-NN
Y41C4A.9	III	11714511	11714666	105	440	561	3.66662	16.6539	14.8112	2.18334	2.01417	-	NN-NN
ccch-1	V	11536261	11536593	69	289	235	2.40949	10.9386	6.20435	2.18263	1.36455	+	gt-ag
F49F1.5	IV	4119597	4119739	82	343	289	2.86346	12.9825	7.63003	2.18074	1.41393	-	NN-NN
T05A7.1	II	4678647	4679146	11	46	251	0.384122	1.74109	6.62677	2.18036	4.10867	+	gt-ag
F23B12.4	V	14443381	14444665	248	1036	1671	8.66021	39.2124	44.1169	2.17884	2.34886	+	gt-ag
pqn-72	I	3276831	3277575	96	401	1261	3.35234	15.1778	33.2923	2.17872	3.31195	-	NN-NN
cal-4	IV	10529811	10529976	74	309	176	2.58409	11.6956	4.64666	2.17824	0.846536	+	gt-ag
kvs-1	X	7695125	7696007	29	121	77	1.01269	4.57983	2.03291	2.17711	1.00536	-	NN-NN
F41G4.8	X	16843754	16844055	47	196	229	1.64125	7.41857	6.04594	2.17635	1.88117	-	NN-NN
F52H2.4	X	2545347	2545992	24	100	16	0.838084	3.78498	0.422424	2.17512	-0.988404	-	NN-NN
Y42H9AR.4	IV	8111082	8111206	98	408	293	3.42218	15.4427	7.73564	2.17394	1.17661	-	NN-NN
cdf-1	X	6502839	6504434	80	333	140	2.79361	12.604	3.69621	2.17368	0.403913	-	NN-NN
Y57G11C.31	IV	14683524	14684319	74	308	291	2.58409	11.6578	7.68283	2.17356	1.57198	+	gt-ag
lact-3	II	10655401	10656023	93	387	127	3.24758	14.6479	3.35299	2.17326	0.046084	-	NN-NN
daam-1	V	70105	70791	13	54	112	0.453962	2.04389	2.95697	2.17067	2.70347	-	NN-NN
spsb-1	II	15224815	15226033	105	436	493	3.66662	16.5025	13.0159	2.17016	1.82776	+	gt-ag
K08D12.3	IV	1710405	1710566	79	328	295	2.75869	12.4147	7.78844	2.17	1.49735	+	gt-ag
mat-3	III	478630	480549	87	361	129	3.03806	13.6638	3.40579	2.16914	0.164842	+	gt-ag
sel-8	III	3614432	3615377	88	365	248	3.07298	13.8152	6.54757	2.16855	1.09132	-	NN-NN
Y64G10A.7	IV	14311854	14312021	35	145	166	1.22221	5.48823	4.38265	2.16685	1.84231	+	gt-ag
cars-1	I	2627196	2628091	35	145	82	1.22221	5.48823	2.16492	2.16685	0.824827	-	NN-NN
tpa-1	IV	106181	107229	57	236	478	1.99045	8.93256	12.6199	2.16598	2.66453	+	gt-ag
Y17D7C.3	V	18721091	18722204	36	149	41	1.25713	5.63963	1.08246	2.16547	-0.215815	-	NN-NN
Y48E1B.3	II	13561205	13562654	160	662	355	5.58723	25.0566	9.37253	2.16499	0.746305	-	NN-NN
fmi-1	V	13020638	13022688	31	128	88	1.08253	4.84478	2.32333	2.16203	1.10179	+	gt-ag
cyp-33C8	V	3801135	3801895	70	289	254	2.44441	10.9386	6.70598	2.16187	1.45596	-	NN-NN
arr-1	X	952187	952549	47	194	105	1.64125	7.34287	2.77216	2.16155	0.756215	+	gt-ag
vps-41	X	5287434	5287953	16	66	131	0.558723	2.49809	3.4586	2.16062	2.62998	+	gt-ag
F59E12.9	II	5642925	5643460	66	272	190	2.30473	10.2952	5.01628	2.15929	1.12202	-	NN-NN
odd-1	III	7108638	7108899	33	136	159	1.15237	5.14758	4.19784	2.15929	1.86505	+	gt-ag
tbc-7	X	5145446	5146131	58	239	346	2.02537	9.04611	9.13492	2.15911	2.17321	+	gt-ag
rbc-1	X	14622473	14622758	25	103	64	0.873005	3.89853	1.6897	2.15887	0.952702	+	gt-ag
bre-4	I	1623339	1623775	92	379	237	3.21266	14.3451	6.25715	2.15872	0.961739	-	NN-NN
cft-1	V	5545010	5545547	42	173	26	1.46665	6.54802	0.686439	2.15854	-1.09532	+	gt-ag
C31E10.5	X	13993697	13994962	26	107	60	0.907925	4.04993	1.58409	2.15725	0.803009	-	NN-NN
sex-1	X	10203256	10203869	26	107	56	0.907925	4.04993	1.47848	2.15725	0.703473	-	NN-NN
F26H9.2	I	9291247	9291341	80	329	210	2.79361	12.4526	5.54431	2.15624	0.988876	-	NN-NN
mup-4	III	7485907	7486003	178	732	920	6.21579	27.7061	24.2894	2.15619	1.96631	-	NN-NN
tag-140	V	11464377	11464884	18	74	56	0.628563	2.80089	1.47848	2.15575	1.23399	+	gt-ag
Y22D7AL.7	III	1578553	1579051	46	189	227	1.60633	7.15362	5.99314	2.15491	1.89954	+	gt-ag
madf-2	I	11276683	11276877	56	230	295	1.95553	8.70546	7.78844	2.15436	1.99377	-	NN-NN
R10F2.6	III	2942475	2942766	47	193	120	1.64125	7.30502	3.16818	2.15409	0.94886	-	NN-NN
C15H11.13	V	14395243	14395349	19	78	55	0.663484	2.95229	1.45208	2.1537	1.12999	+	gt-ag
T10E9.1	I	6545791	6545868	48	197	201	1.67617	7.45642	5.3067	2.15332	1.66265	+	gt-ag
obr-3	X	13799722	13800263	48	197	185	1.67617	7.45642	4.88428	2.15332	1.54298	-	NN-NN
mlt-7	II	4398024	4398569	756	3102	3312	26.3997	117.41	87.4417	2.15297	1.7278	+	gt-ag
T22F3.2	V	3587758	3588003	98	402	376	3.42218	15.2156	9.92696	2.15257	1.53644	+	gt-ag
C18E3.3	I	4206463	4206955	69	283	86	2.40949	10.7115	2.27053	2.15236	-0.0857016	+	gt-ag
F52D2.7	X	1963385	1963908	10	41	39	0.349202	1.55184	1.02966	2.15185	1.56003	+	gt-ag
hip-1	III	13622226	13622417	10	41	15	0.349202	1.55184	0.396022	2.15185	0.181521	-	NN-NN
pac-1	III	8496245	8497057	30	123	266	1.04761	4.65553	7.0228	2.15185	2.74495	+	gt-ag
nhr-256	V	1744822	1745945	30	123	203	1.04761	4.65553	5.3595	2.15185	2.355	+	gt-ag
W02D9.4	I	12538377	12538488	30	123	46	1.04761	4.65553	1.21447	2.15185	0.21323	-	NN-NN
acs-12	V	20906126	20907143	41	168	308	1.43173	6.35877	8.13166	2.15099	2.50579	+	gt-ag
ugt-11	V	4893822	4894340	41	168	296	1.43173	6.35877	7.81484	2.15099	2.44846	-	NN-NN
Y66D12A.24	III	11499551	11500489	98	401	284	3.42218	15.1778	7.49802	2.14897	1.1316	+	gt-ag
C17E4.1	I	9409435	9409587	11	45	29	0.384122	1.70324	0.765643	2.14865	0.995108	-	NN-NN
Y49F6B.9	II	3497723	3498659	23	94	94	0.803164	3.55789	2.48174	2.14725	1.62759	-	NN-NN
C15F1.1	II	6991346	6991463	197	805	1443	6.87928	30.4691	38.0974	2.14702	2.46936	+	gt-ag
T10B11.6	I	6944877	6945013	98	400	400	3.42218	15.1399	10.5606	2.14537	1.6257	-	NN-NN
gst-11	X	3632722	3633061	101	412	332	3.52694	15.5941	8.7653	2.14452	1.31339	-	NN-NN
col-186	X	15953108	15953209	52	212	60	1.81585	8.02417	1.58409	2.14371	-0.196991	+	gt-ag
npp-21	II	7604190	7605572	39	159	134	1.36189	6.01812	3.5378	2.14371	1.37725	+	gt-ag
kin-26	IV	7877489	7877786	14	57	48	0.488883	2.15744	1.26727	2.14176	1.37417	-	NN-NN
fbxa-166	II	1617852	1618481	28	114	57	0.977765	4.31488	1.50489	2.14176	0.622093	-	NN-NN
slcf-1	X	10531453	10531686	15	61	98	0.523803	2.30884	2.58735	2.14007	2.30438	+	gt-ag
abl-1	X	10617214	10617782	76	309	244	2.65393	11.6956	6.44196	2.13976	1.27937	-	NN-NN
F33H12.7	II	2586602	2586848	234	951	860	8.17132	35.9952	22.7053	2.13916	1.47439	-	NN-NN
W09D6.1	III	11069200	11069282	16	65	17	0.558723	2.46024	0.448825	2.13859	-0.315979	+	gt-ag
T21C9.6	V	10585541	10585854	67	272	245	2.33965	10.2952	6.46837	2.1376	1.46711	+	gt-ag
par-6	I	12670385	12671316	86	349	362	3.00314	13.2096	9.55734	2.13704	1.67014	+	gt-ag
mig-5	II	8182626	8182790	194	787	701	6.77452	29.7878	18.5074	2.13653	1.44992	-	NN-NN
Y56A3A.36	III	11930087	11931004	38	154	242	1.32697	5.82888	6.38916	2.13508	2.26749	-	NN-NN
Y17D7B.7	V	18780625	18781006	19	77	61	0.663484	2.91444	1.61049	2.13508	1.27937	-	NN-NN
Y69A2AR.14	IV	2555210	2555548	19	77	13	0.663484	2.91444	0.343219	2.13508	-0.95093	+	gt-ag
pqn-36	X	15410478	15410565	80	324	432	2.79361	12.2633	11.4054	2.13415	2.02952	-	NN-NN
Y32B12B.4	V	16559112	16560056	41	166	36	1.43173	6.28307	0.950454	2.13371	-0.591069	+	gt-ag
W03F8.3	IV	5185373	5187155	106	429	334	3.70154	16.2376	8.8181	2.13314	1.25234	+	gt-ag
H14N18.4	V	8927520	8928829	174	704	903	6.07611	26.6463	23.8405	2.13271	1.9722	-	NN-NN
amx-2	I	12763893	12763990	66	267	549	2.30473	10.1059	14.4944	2.13253	2.65283	-	NN-NN
ZC101.1	II	14681802	14682191	44	178	72	1.53649	6.73727	1.90091	2.13253	0.307052	-	NN-NN
kcc-2	IV	6061820	6062095	70	283	441	2.44441	10.7115	11.6431	2.1316	2.25191	+	gt-ag
F02D8.4	V	14986007	14986199	189	763	716	6.59992	28.8794	18.9035	2.12952	1.51813	+	gt-ag
C49H3.4	IV	7915523	7916084	27	109	55	0.942845	4.12563	1.45208	2.12952	0.62303	+	gt-ag
abl-1	X	10611965	10612074	63	254	239	2.19997	9.61386	6.30996	2.12763	1.52015	-	NN-NN
rlbp-1	I	7683784	7684027	66	266	242	2.30473	10.0681	6.38916	2.12711	1.47103	+	gt-ag
C39D10.11	X	7903600	7903775	38	153	165	1.32697	5.79103	4.35625	2.12569	1.71495	+	gt-ag
F26F2.7	V	20581643	20582080	49	197	299	1.71109	7.45642	7.89405	2.12357	2.20585	+	gt-ag
din-1	II	11623796	11623936	51	205	230	1.78093	7.75922	6.07234	2.12328	1.76962	-	NN-NN
C13F10.5	V	7217857	7218104	108	434	495	3.77138	16.4268	13.0687	2.12289	1.79296	-	NN-NN
ttx-1	V	20054184	20055639	58	233	34	2.02537	8.81901	0.897651	2.12243	-1.17396	-	NN-NN
sox-2	X	7459554	7459626	120	482	368	4.19042	18.2436	9.71575	2.12222	1.21323	-	NN-NN
C34D10.2	X	8020980	8021189	61	245	434	2.13013	9.27321	11.4582	2.12213	2.42737	+	gt-ag
ipla-3	V	20724098	20724571	62	249	117	2.16505	9.42461	3.08897	2.12203	0.512727	-	NN-NN
twk-46	V	19062370	19063221	62	249	110	2.16505	9.42461	2.90416	2.12203	0.423722	+	gt-ag
unc-96	X	612384	612708	65	261	273	2.26981	9.87881	7.20761	2.12176	1.66695	-	NN-NN
atg-4.2	IV	11669161	11669519	14	56	52	0.488883	2.11959	1.37288	2.11623	1.48964	+	gt-ag
tmc-2	X	9304822	9305107	13	52	103	0.453962	1.96819	2.71935	2.11623	2.58262	+	gt-ag
twk-39	III	11801774	11802995	13	52	55	0.453962	1.96819	1.45208	2.11623	1.67748	+	gt-ag
Y119C1B.10	I	4556163	4556265	29	116	46	1.01269	4.39058	1.21447	2.11623	0.262139	-	NN-NN
cgef-1	X	2778440	2779686	15	60	71	0.523803	2.27099	1.87451	2.11623	1.83941	+	gt-ag
nhr-40	X	2604621	2604709	48	192	110	1.67617	7.26717	2.90416	2.11623	0.792955	+	gt-ag
T28D6.4	III	11364371	11364918	64	256	326	2.23489	9.68956	8.60689	2.11623	1.94529	+	gt-ag
F22G12.5	I	13164317	13164413	17	68	160	0.593643	2.57379	4.22424	2.11623	2.83102	+	gt-ag
daf-19	II	10168262	10169254	50	200	92	1.74601	7.56997	2.42894	2.11623	0.476264	-	NN-NN
W05F2.4	I	3379183	3380181	36	144	242	1.25713	5.45038	6.38916	2.11623	2.3455	-	NN-NN
par-2	III	1084461	1087785	55	220	186	1.92061	8.32697	4.91068	2.11623	1.35436	+	gt-ag
xrn-2	II	14158266	14159383	102	408	618	3.56186	15.4427	16.3161	2.11623	2.1956	+	gc-ag
otpl-8	X	12267522	12267642	21	84	58	0.733324	3.17939	1.53129	2.11623	1.06222	-	NN-NN
nas-8	IV	7118215	7118324	21	84	56	0.733324	3.17939	1.47848	2.11623	1.0116	+	gt-ag
ace-2	I	3302321	3302494	119	476	278	4.1555	18.0165	7.33961	2.11623	0.820681	-	NN-NN
R01H2.7	III	7035513	7036208	39	156	144	1.36189	5.90458	3.80181	2.11623	1.48108	-	NN-NN
M176.5	II	9427513	9427623	20	80	56	0.698404	3.02799	1.47848	2.11623	1.08198	-	NN-NN
T07C4.10	III	10321945	10322266	62	248	275	2.16505	9.38676	7.26041	2.11623	1.74565	+	gt-ag
C33G3.6	X	14082287	14082393	22	88	19	0.768244	3.33079	0.501628	2.11623	-0.614946	-	NN-NN
ZC434.9	I	10358495	10360189	45	180	243	1.57141	6.81297	6.41556	2.11623	2.02952	+	gt-ag
mod-1	V	8911280	8911406	26	104	70	0.907925	3.93638	1.8481	2.11623	1.0254	-	NN-NN
F54B11.4	X	13592754	13592911	23	92	22	0.803164	3.48219	0.580833	2.11623	-0.467572	+	gt-ag
tag-343	X	16672644	16672941	25	100	93	0.873005	3.78498	2.45534	2.11623	1.49186	-	NN-NN
M60.6	X	8249659	8249817	27	108	87	0.942845	4.08778	2.29693	2.11623	1.28461	-	NN-NN
twk-1	I	7269615	7270014	106	423	266	3.70154	16.0105	7.0228	2.11282	0.92392	-	NN-NN
Y37H9A.3	I	13785346	13785935	78	311	239	2.72377	11.7713	6.30996	2.11159	1.21202	+	gt-ag
dhps-1	II	11997227	11997661	71	283	135	2.47933	10.7115	3.5642	2.11114	0.523627	+	gt-ag
K01A11.2	III	3426892	3427092	70	279	466	2.44441	10.5601	12.3031	2.11106	2.33146	+	gt-ag
myrf-2	X	10187958	10194290	64	255	138	2.23489	9.65171	3.64341	2.11058	0.705083	-	NN-NN
F49D11.10	I	10930073	10931455	126	502	322	4.39994	19.0006	8.50128	2.11049	0.950195	-	NN-NN
C30H6.5	IV	17373718	17373802	47	187	585	1.64125	7.07792	15.4449	2.10853	3.23426	+	gt-ag
flh-2	III	4954088	4954173	42	167	53	1.46665	6.32092	1.39928	2.10761	-0.0678388	+	gt-ag
lgc-47	X	9806243	9806922	41	163	140	1.43173	6.16952	3.69621	2.1074	1.36829	-	NN-NN
brc-1	III	3858436	3858946	38	151	85	1.32697	5.71533	2.24413	2.1067	0.758022	-	NN-NN
nhr-62	I	9841123	9842690	38	151	50	1.32697	5.71533	1.32007	2.1067	-0.00751317	+	gt-ag
nhr-16	II	4439141	4439375	37	147	42	1.29205	5.56393	1.10886	2.10644	-0.220578	+	gt-ag
ZK622.4	II	5292759	5292842	73	290	435	2.54917	10.9765	11.4846	2.10631	2.17161	+	gt-ag
C16E9.1	X	6941474	6942001	72	286	270	2.51425	10.8251	7.1284	2.10617	1.50345	+	gt-ag
ceh-88	IV	17329795	17330180	30	119	127	1.04761	4.50413	3.35299	2.10415	1.67835	+	gt-ag
C35D10.8	III	4855340	4855436	30	119	44	1.04761	4.50413	1.16167	2.10415	0.149099	+	gt-ag
nhr-104	IV	4786425	4786766	90	357	266	3.14282	13.5124	7.0228	2.10415	1.15999	-	NN-NN
spe-44	IV	12452975	12453273	84	333	199	2.9333	12.604	5.2539	2.10329	0.840865	-	NN-NN
zig-8	III	13129256	13130078	27	107	33	0.942845	4.04993	0.871249	2.10281	-0.113935	+	gt-ag
ceh-100	II	12588000	12589036	52	206	172	1.81585	7.79707	4.54106	2.10229	1.32238	-	NN-NN
Y4C6B.5	IV	5320654	5320878	26	103	126	0.907925	3.89853	3.32659	2.10229	1.8734	+	gt-ag
M7.8	IV	11094809	11094881	26	103	97	0.907925	3.89853	2.56094	2.10229	1.49603	-	NN-NN
ugtp-1	III	8746761	8747001	100	396	129	3.49202	14.9885	3.40579	2.10173	-0.0360708	-	NN-NN
ZC455.1	V	12778817	12779099	25	99	248	0.873005	3.74713	6.54757	2.10173	2.9069	+	gt-ag
C52D10.12	IV	17200134	17200889	68	269	357	2.37457	10.1816	9.42533	2.10023	1.98888	-	NN-NN
nhr-3	X	14559740	14560667	157	621	273	5.48247	23.5048	7.20761	2.10005	0.394695	+	gt-ag
guk-1	I	3860583	3861960	263	1040	386	9.18401	39.3638	10.191	2.09967	0.150096	-	NN-NN
W01A8.6	I	7072332	7072461	64	253	246	2.23489	9.57601	6.49477	2.09922	1.53907	-	NN-NN
T10H9.8	V	6652570	6653025	142	561	860	4.95867	21.2338	22.7053	2.09834	2.195	+	gt-ag
perm-5	IV	5698449	5698718	162	640	317	5.65707	24.2239	8.36927	2.0983	0.565047	-	NN-NN
hpo-26	V	6532508	6532891	40	158	284	1.39681	5.98027	7.49802	2.09808	2.42438	-	NN-NN
K08A2.4	II	2988609	2989680	38	150	193	1.32697	5.67748	5.09549	2.09712	1.94109	+	gt-ag
F22B8.4	V	16087224	16087312	38	150	74	1.32697	5.67748	1.95371	2.09712	0.558084	+	gt-ag
ttb-1	V	157286	160308	36	142	214	1.25713	5.37468	5.64992	2.09605	2.1681	+	gt-ag
T15B12.1	III	5290816	5294620	18	71	55	0.628563	2.68734	1.45208	2.09605	1.20799	+	gt-ag
abu-12	X	456232	457309	18	71	53	0.628563	2.68734	1.39928	2.09605	1.15455	-	NN-NN
scrm-8	IV	4165405	4165803	18	71	41	0.628563	2.68734	1.08246	2.09605	0.784185	+	gt-ag
ZK669.5	II	7945802	7945978	51	201	131	1.78093	7.60782	3.4586	2.09485	0.957556	-	NN-NN
lrp-2	I	3946054	3946521	98	386	559	3.42218	14.61	14.7584	2.09397	2.10855	-	NN-NN
nmat-1	X	12015768	12015945	31	122	97	1.08253	4.61768	2.56094	2.09277	1.24227	-	NN-NN
twk-33	V	17713942	17714069	15	59	53	0.523803	2.23314	1.39928	2.09198	1.41759	-	NN-NN
dgk-4	IV	8634075	8634192	72	283	452	2.51425	10.7115	11.9335	2.09096	2.24681	+	gt-ag
pat-12	III	730684	731532	86	338	336	3.00314	12.7932	8.8709	2.09084	1.56261	-	NN-NN
zip-3	II	13955990	13957383	28	110	171	0.977765	4.16348	4.51466	2.09023	2.20706	-	NN-NN
Y75B8A.3	III	12102042	12102207	42	165	290	1.46665	6.24522	7.65643	2.09023	2.38415	-	NN-NN
nhr-120	X	6639500	6640516	13	51	243	0.453962	1.93034	6.41556	2.08821	3.82093	-	NN-NN
ugt-45	IV	3750274	3750561	13	51	167	0.453962	1.93034	4.40905	2.08821	3.27982	-	NN-NN
rgef-1	V	9556830	9557590	26	102	236	0.907925	3.86068	6.23075	2.08821	2.77876	-	NN-NN
sid-2	III	13681374	13681935	102	400	467	3.56186	15.1399	12.3295	2.08766	1.79141	+	gt-ag
rps-22	III	1950996	1951073	976	3827	4543	34.0821	144.851	119.942	2.08749	1.81525	+	gt-ag
npp-4	I	14703457	14704710	119	466	255	4.1555	17.638	6.73238	2.08559	0.696094	-	NN-NN
F26F2.7	V	20581447	20581550	59	231	368	2.06029	8.74331	9.71575	2.08533	2.23748	+	gt-ag
best-8	I	14159165	14159436	23	90	94	0.803164	3.40649	2.48174	2.08452	1.62759	-	NN-NN
H04D03.6	III	10438421	10438827	11	43	81	0.384122	1.62754	2.13852	2.08306	2.47698	-	NN-NN
T04F8.3	X	11658888	11659163	11	43	13	0.384122	1.62754	0.343219	2.08306	-0.162434	+	gt-ag
DH11.5	II	7985508	7985640	33	129	136	1.15237	4.88263	3.5906	2.08306	1.63963	+	gt-ag
mod-1	V	8913833	8913936	22	86	277	0.768244	3.25509	7.31321	2.08306	3.25087	-	NN-NN
pbrm-1	I	7500056	7501317	172	672	428	6.00627	25.4351	11.2998	2.08228	0.91176	+	gt-ag
Y59C2A.1	II	2209707	2210190	95	371	436	3.31742	14.0423	11.5111	2.08165	1.79489	+	gt-ag
K01D12.9	V	12404364	12404519	272	1062	4007	9.49829	40.1965	105.791	2.08133	3.4774	-	NN-NN
dpy-21	V	17941006	17943129	31	121	181	1.08253	4.57983	4.77867	2.08089	2.14221	-	NN-NN
F22B7.1	III	8665462	8665561	41	160	26	1.43173	6.05597	0.686439	2.0806	-1.06055	+	gt-ag
moa-1	III	1964119	1965005	51	199	83	1.78093	7.53212	2.19132	2.08043	0.299172	-	NN-NN
C46H3.2	X	1212672	1213050	30	117	126	1.04761	4.42843	3.32659	2.0797	1.66695	-	NN-NN
oac-23	IV	3882291	3882439	30	117	105	1.04761	4.42843	2.77216	2.0797	1.40391	+	gt-ag
Y23H5B.5	I	2498427	2499972	99	386	670	3.4571	14.61	17.689	2.07933	2.35522	+	gt-ag
lfi-1	X	4983186	4983563	19	74	63	0.663484	2.80089	1.66329	2.07775	1.32591	+	gt-ag
srap-1	II	11203948	11206666	119	463	570	4.1555	17.5245	15.0489	2.07628	1.85656	+	gt-ag
taf-2	IV	3593134	3593369	52	202	228	1.81585	7.64567	6.01954	2.074	1.72901	-	NN-NN
ugt-53	V	2851159	2851490	67	260	72	2.33965	9.84096	1.90091	2.0725	-0.299606	+	gt-ag
C50F4.1	V	9528430	9528520	66	256	358	2.30473	9.68956	9.45173	2.07183	2.03598	+	gt-ag
Y105E8A.8	I	14402618	14403942	33	128	95	1.15237	4.84478	2.50814	2.07183	1.12202	-	NN-NN
F18E9.3	X	8587918	8589025	194	752	1087	6.77452	28.4631	28.6984	2.0709	2.08278	+	gt-ag
sng-1	X	7327709	7327828	32	124	242	1.11745	4.69338	6.38916	2.07042	2.51542	+	gt-ag
C44B7.2	II	6899136	6899438	64	248	246	2.23489	9.38676	6.49477	2.07042	1.53907	+	gt-ag
mup-4	III	7487911	7488141	296	1147	2217	10.3364	43.4138	58.5321	2.07042	2.5015	-	NN-NN
esyt-2	III	6228830	6229163	63	244	103	2.19997	9.23536	2.71935	2.06968	0.305779	-	NN-NN
C34D10.2	X	8022909	8023109	47	182	480	1.64125	6.88867	12.6727	2.06943	2.94886	+	gt-ag
B0310.2	X	506183	506776	100	387	190	3.49202	14.6479	5.01628	2.06856	0.522558	-	NN-NN
pgp-9	V	17759040	17760066	46	178	277	1.60633	6.73727	7.31321	2.0684	2.18674	+	gt-ag
gpdh-2	III	9855583	9855937	38	147	181	1.32697	5.56393	4.77867	2.06797	1.84848	-	NN-NN
F01D5.10	II	14018296	14018939	15	58	133	0.523803	2.19529	3.5114	2.06732	2.74495	-	NN-NN
F49E2.5	X	9554823	9556628	15	58	28	0.523803	2.19529	0.739242	2.06732	0.497022	+	gt-ag
xpd-1	III	268787	271744	169	653	617	5.90151	24.7159	16.2897	2.06629	1.46481	+	gt-ag
lgc-25	X	14161138	14161395	36	139	120	1.25713	5.26113	3.16818	2.06524	1.33352	-	NN-NN
snt-1	II	6811986	6813083	107	413	388	3.73646	15.632	10.2438	2.06476	1.455	+	gt-ag
rcq-5	III	4056294	4056724	21	81	202	0.733324	3.06584	5.3331	2.06376	2.86245	-	NN-NN
C48D1.1	IV	13196090	13196558	21	81	152	0.733324	3.06584	4.01303	2.06376	2.45217	-	NN-NN
snpc-3.1	IV	5484373	5484516	55	212	241	1.92061	8.02417	6.36276	2.06279	1.72809	-	NN-NN
lst-6	II	7015832	7016208	55	212	176	1.92061	8.02417	4.64666	2.06279	1.27463	-	NN-NN
cle-1	I	8708419	8708795	41	158	142	1.43173	5.98027	3.74901	2.06245	1.38875	-	NN-NN
prmt-6	IV	2132290	2132790	41	158	32	1.43173	5.98027	0.844848	2.06245	-0.760994	+	gt-ag
col-147	V	9633056	9633189	13497	52007	54918	471.318	1968.46	1449.92	2.06229	1.6212	-	NN-NN
nsun-5	II	14972451	14973396	34	131	262	1.18729	4.95833	6.91719	2.06219	2.54252	+	gt-ag
C34H4.2	IV	1554378	1554475	230	886	1054	8.03164	33.535	27.8272	2.0619	1.79273	+	gt-ag
zyg-8	III	12069794	12071015	20	77	111	0.698404	2.91444	2.93057	2.06108	2.06905	+	gt-ag
tbx-7	III	6025410	6025739	20	77	18	0.698404	2.91444	0.475227	2.06108	-0.555445	-	NN-NN
jmjd-2	II	14235455	14236871	13	50	174	0.453962	1.89249	4.59386	2.05964	3.33906	-	NN-NN
ife-5	II	12280780	12283360	13	50	52	0.453962	1.89249	1.37288	2.05964	1.59656	+	gt-ag
F10D11.6	I	8449011	8449378	194	746	1848	6.77452	28.236	48.79	2.05934	2.84839	-	NN-NN
ptr-13	II	11161849	11162186	76	292	533	2.65393	11.0522	14.072	2.05812	2.40662	-	NN-NN
C14B4.2	V	19340614	19341835	25	96	85	0.873005	3.63358	2.24413	2.05733	1.36209	-	NN-NN
Y57G11C.42	IV	14736923	14741631	92	353	462	3.21266	13.361	12.1975	2.05619	1.92475	+	gt-ag
paqr-2	III	5377386	5377795	61	234	105	2.13013	8.85686	2.77216	2.05585	0.380066	-	NN-NN
nhx-1	X	16019264	16019675	12	46	99	0.419042	1.74109	2.61375	2.05483	2.64095	+	gt-ag
pxn-1	V	8501176	8501946	77	295	312	2.68885	11.1657	8.23727	2.05401	1.61517	+	gt-ag
dmd-6	IV	14622742	14622862	71	272	91	2.47933	10.2952	2.40254	2.05394	-0.0453943	+	gt-ag
sup-9	II	2684871	2685043	52	199	153	1.81585	7.53212	4.03943	2.05241	1.15351	-	NN-NN
W05F2.4	I	3384007	3387680	23	88	208	0.803164	3.33079	5.49151	2.0521	2.77344	-	NN-NN
cpf-1	II	8602051	8602131	63	241	339	2.19997	9.12181	8.95011	2.05184	2.02442	-	NN-NN
Y71H2AM.10	III	2709007	2709391	17	65	42	0.593643	2.46024	1.10886	2.05113	0.901413	-	NN-NN
H34C03.2	IV	6758696	6759546	34	130	78	1.18729	4.92048	2.05932	2.05113	0.794498	+	gt-ag
nsy-7	IV	8086079	8086574	128	489	341	4.46978	18.5086	9.00291	2.04992	1.01019	-	NN-NN
cul-5	V	10182302	10182405	50	191	108	1.74601	7.22932	2.85136	2.0498	0.707589	+	gt-ag
nhr-210	V	519174	519286	11	42	200	0.384122	1.58969	5.2803	2.04911	3.78098	-	NN-NN
fln-2	X	9423678	9423947	11	42	24	0.384122	1.58969	0.633636	2.04911	0.722089	+	gt-ag
nhr-62	I	9842748	9843443	44	168	40	1.53649	6.35877	1.05606	2.04911	-0.540945	+	gt-ag
C34D1.4	V	13258399	13258973	49	187	138	1.71109	7.07792	3.64341	2.04841	1.09037	-	NN-NN
myo-6	III	13421122	13421214	76	290	319	2.65393	10.9765	8.42208	2.04821	1.66604	+	gt-ag
tbce-1	IV	8296401	8297031	108	412	582	3.77138	15.5941	15.3657	2.04784	2.02655	+	gt-ag
M28.8	II	10628843	10628964	27	103	48	0.942845	3.89853	1.26727	2.04784	0.426633	+	gt-ag
haao-1	V	9505932	9506196	118	450	341	4.12058	17.0324	9.00291	2.04736	1.12754	+	gt-ag
Y39E4B.13	III	13091206	13093004	32	122	42	1.11745	4.61768	1.10886	2.04696	-0.0111244	+	gt-ag
F55H2.5	III	9512091	9512602	21	80	118	0.733324	3.02799	3.11538	2.04584	2.08688	+	gt-ag
sqrd-1	IV	14220057	14220979	42	160	83	1.46665	6.05597	2.19132	2.04584	0.57928	+	gt-ag
F28A10.9	II	833942	834085	21	80	20	0.733324	3.02799	0.52803	2.04584	-0.473831	-	NN-NN
unc-43	IV	10329201	10330671	72	274	184	2.51425	10.3709	4.85787	2.04433	0.950195	-	NN-NN
F14B6.2	I	12221377	12221650	46	175	224	1.60633	6.62372	5.91393	2.04388	1.88035	-	NN-NN
lron-2	V	9287285	9287376	71	270	498	2.47933	10.2195	13.1479	2.04329	2.40681	-	NN-NN
Y50D4B.4	V	1093515	1096424	15	57	102	0.523803	2.15744	2.69295	2.04223	2.36209	+	gt-ag
daf-9	X	6197016	6197303	30	114	93	1.04761	4.31488	2.45534	2.04223	1.22883	+	gt-ag
slc-36.4	I	9152107	9152527	20	76	70	0.698404	2.87659	1.8481	2.04223	1.40391	+	gt-ag
VM106R.1	II	10828487	10828715	63	239	155	2.19997	9.04611	4.09223	2.03981	0.895403	-	NN-NN
hmit-1.3	III	3512780	3513388	29	110	136	1.01269	4.16348	3.5906	2.0396	1.82604	-	NN-NN
plc-3	II	10225191	10225289	43	163	249	1.50157	6.16952	6.57397	2.03869	2.1303	+	gt-ag
K08B5.1	X	16560246	16560838	19	72	75	0.663484	2.72519	1.98011	2.03822	1.57745	+	gt-ag
dhhc-13	IV	5917793	5918210	33	125	113	1.15237	4.73123	2.98337	2.03762	1.37234	+	gt-ag
snf-4	II	12834759	12835029	14	53	24	0.488883	2.00604	0.633636	2.03679	0.374166	-	NN-NN
twk-42	V	17729384	17729942	28	106	153	0.977765	4.01208	4.03943	2.03679	2.04659	-	NN-NN
cha-1	IV	3616232	3616304	28	106	73	0.977765	4.01208	1.92731	2.03679	0.979028	-	NN-NN
cdh-3	III	7742212	7742503	28	106	63	0.977765	4.01208	1.66329	2.03679	0.766483	-	NN-NN
T19C3.4	III	619698	620141	121	458	440	4.22534	17.3352	11.6167	2.03657	1.45905	-	NN-NN
C26F1.1	V	7785892	7786804	158	598	1052	5.51739	22.6342	27.7744	2.03645	2.3317	+	gt-ag
skpo-2	II	3434699	3434841	74	280	234	2.58409	10.598	6.17795	2.03606	1.25747	-	NN-NN
C49H3.6	IV	7904512	7904599	68	257	177	2.37457	9.72741	4.67306	2.03439	0.976701	+	gt-ag
C33A12.19	IV	9517861	9518120	18	68	103	0.628563	2.57379	2.71935	2.03376	2.11313	+	gt-ag
rilp-1	III	3642186	3642972	18	68	67	0.628563	2.57379	1.7689	2.03376	1.49272	+	gt-ag
syg-1	X	2510104	2510279	45	170	35	1.57141	6.43447	0.924052	2.03376	-0.766012	-	NN-NN
pqn-15	X	4306167	4306389	22	83	43	0.768244	3.14154	1.13526	2.03183	0.563391	-	NN-NN
F52D2.12	X	1979540	1979853	44	166	35	1.53649	6.28307	0.924052	2.03183	-0.73359	+	gt-ag
C16A11.2	II	4239708	4240519	35	132	70	1.22221	4.99618	1.8481	2.03134	0.596558	+	gt-ag
usp-46	III	9777564	9777810	96	362	217	3.35234	13.7016	5.72912	2.03111	0.773147	+	gt-ag
T07H6.4	X	6284855	6284983	13	49	31	0.453962	1.85464	0.818446	2.0305	0.850315	-	NN-NN
F13B9.1	X	8293142	8293918	138	520	278	4.81899	19.6819	7.33961	2.03007	0.606975	+	gt-ag
ZK863.8	V	12186722	12186822	125	471	808	4.36502	17.8273	21.3324	2.03002	2.28899	-	NN-NN
nlg-1	X	13629060	13629342	64	241	180	2.23489	9.12181	4.75227	2.02912	1.08841	-	NN-NN
F27C1.11	I	5441381	5441635	17	64	79	0.593643	2.42239	2.08572	2.02876	1.81288	-	NN-NN
T10H9.8	V	6653166	6653512	34	128	232	1.18729	4.84478	6.12515	2.02876	2.36708	+	gt-ag
cup-5	III	7586380	7586460	38	143	22	1.32697	5.41253	0.580833	2.02817	-1.19194	+	gt-ag
Y57G11B.2	IV	14565431	14565745	50	188	272	1.74601	7.11577	7.18121	2.02696	2.04016	+	gt-ag
fbxa-50	III	1288090	1288411	25	94	128	0.873005	3.55789	3.37939	2.02696	1.9527	-	NN-NN
klf-3	II	6619961	6621432	54	203	174	1.88569	7.68352	4.59386	2.02667	1.28461	+	gt-ag
lars-2	I	7457951	7458042	29	109	140	1.01269	4.12563	3.69621	2.02643	1.86786	-	NN-NN
hrg-6	IV	11032979	11033188	37	139	75	1.29205	5.26113	1.98011	2.02571	0.615923	+	gt-ag
tbck-1	II	4830954	4831461	12	45	28	0.419042	1.70324	0.739242	2.02312	0.818951	+	gt-ag
otub-4	IV	3375500	3376172	76	285	319	2.65393	10.7872	8.42208	2.02312	1.66604	-	NN-NN
gbb-1	X	2959324	2959639	16	60	117	0.558723	2.27099	3.08897	2.02312	2.46692	+	gt-ag
F28E10.1	IV	4580287	4581365	52	195	26	1.81585	7.38072	0.686439	2.02312	-1.40344	+	gt-ag
unc-105	II	8119518	8119752	40	150	78	1.39681	5.67748	2.05932	2.02312	0.560032	+	gt-ag
tyr-2	III	13745818	13746005	296	1110	1916	10.3364	42.0133	50.5853	2.02312	2.29099	+	gt-ag
itr-1	IV	7690542	7690615	115	431	345	4.01582	16.3133	9.10851	2.02228	1.18152	+	gt-ag
Y75B8A.7	III	12157405	12158846	122	457	349	4.26026	17.2974	9.21412	2.02154	1.1129	+	gt-ag
ZC416.2	IV	3634388	3635239	43	161	338	1.50157	6.09382	8.9237	2.02088	2.57117	+	gt-ag
ZK688.10	III	7896505	7896661	39	146	105	1.36189	5.52608	2.77216	2.02065	1.0254	-	NN-NN
Y95B8A.2	I	940307	940512	327	1224	3182	11.4189	46.3282	84.0095	2.02047	2.87913	+	gt-ag
pry-1	I	14173214	14173474	101	378	490	3.52694	14.3072	12.9367	2.02026	1.87498	-	NN-NN
C24A1.3	III	695865	696029	62	232	305	2.16505	8.78116	8.05245	2.02001	1.89503	-	NN-NN
F23F12.12	III	6508788	6509185	444	1661	1578	15.5046	62.8686	41.6616	2.01965	1.42602	+	gt-ag
slo-1	V	18496312	18497242	19	71	57	0.663484	2.68734	1.50489	2.01805	1.18152	+	gt-ag
F59A7.8	V	2009869	2009983	15	56	57	0.523803	2.11959	1.50489	2.01669	1.52256	+	gt-ag
kin-1	I	14937146	14940901	30	112	43	1.04761	4.23918	1.13526	2.01669	0.115932	+	gt-ag
srap-1	II	11218367	11219458	45	168	333	1.57141	6.35877	8.7917	2.01669	2.48408	+	gt-ag
Y51A2D.7	V	18547810	18548806	77	287	260	2.68885	10.8629	6.86439	2.01435	1.35214	+	gt-ag
T20F10.2	I	10298337	10299275	40	149	251	1.39681	5.63963	6.62677	2.01347	2.24617	+	gt-ag
taf-1	I	13879967	13881752	127	473	423	4.43486	17.903	11.1678	2.01324	1.33239	+	gt-ag
magu-1	III	468594	469363	65	242	110	2.26981	9.15966	2.90416	2.01272	0.35555	-	NN-NN
pxn-1	V	8500038	8500117	122	454	359	4.26026	17.1838	9.47814	2.01204	1.15366	+	gt-ag
rimb-1	III	1793753	1794120	32	119	99	1.11745	4.50413	2.61375	2.01104	1.22591	+	gt-ag
grdn-1	V	18607226	18607299	39	145	78	1.36189	5.48823	2.05932	2.01073	0.596558	+	gt-ag
F25E5.1	V	7467064	7467201	28	104	196	0.977765	3.93638	5.17469	2.00931	2.40391	+	gt-ag
cdh-1	III	2934119	2934413	14	52	218	0.488883	1.96819	5.75553	2.00931	3.55739	+	gt-ag
aat-5	I	2574584	2575439	105	390	265	3.66662	14.7614	6.9964	2.00931	0.932161	-	NN-NN
ras-1	II	12347382	12349349	163	605	418	5.69199	22.8992	11.0358	2.00829	0.955189	-	NN-NN
ptp-1	III	3607745	3608124	149	553	754	5.20311	20.931	19.9067	2.00819	1.93581	+	gt-ag
C27A12.9	I	6066898	6067268	155	575	592	5.41263	21.7637	15.6297	2.00752	1.52989	-	NN-NN
cnt-2	III	10669340	10672848	155	575	324	5.41263	21.7637	8.55408	2.00752	0.660284	+	gt-ag
F26G1.2	II	4763712	4763932	51	189	114	1.78093	7.15362	3.00977	2.00604	0.757023	+	gt-ag
tsp-7	I	9970246	9970349	17	63	237	0.593643	2.38454	6.25715	2.00604	3.39784	-	NN-NN
pdk-1	X	1325670	1326079	105	389	333	3.66662	14.7236	8.7917	2.00561	1.26169	+	gt-ag
Y50D4A.4	V	1194785	1195549	54	200	150	1.88569	7.56997	3.96022	2.00519	1.07049	-	NN-NN
R05F9.9	II	4900367	4900673	37	137	65	1.29205	5.18543	1.7161	2.0048	0.409473	-	NN-NN
W08G11.1	V	16347840	16348006	10	37	52	0.349202	1.40044	1.37288	2.00375	1.97507	+	gt-ag
Y50D7A.3	III	259519	261125	110	407	455	3.84122	15.4049	12.0127	2.00375	1.64492	+	gt-ag
dml-1	IV	2887075	2887388	23	85	33	0.803164	3.21724	0.871249	2.00205	0.11739	+	gt-ag
cdh-3	III	7743936	7744009	108	399	157	3.77138	15.1021	4.14503	2.00158	0.136291	-	NN-NN
attf-3	III	83292	83430	88	325	217	3.07298	12.3012	5.72912	2.00109	0.898678	-	NN-NN
vha-7	IV	12644465	12644672	26	96	147	0.907925	3.63358	3.88102	2.00075	2.09579	+	gt-ag
klp-12	IV	11343565	11344365	129	476	341	4.5047	18.0165	9.00291	1.99982	0.998959	-	NN-NN
tfg-1	I	14101365	14102047	29	107	89	1.01269	4.04993	2.34973	1.99971	1.21431	+	gt-ag
lin-22	IV	3019808	3019906	58	214	354	2.02537	8.09987	9.34613	1.99971	2.20618	+	gt-ag
glna-1	II	14725317	14725490	135	498	836	4.71423	18.8492	22.0716	1.99941	2.2271	-	NN-NN
unc-22	IV	11995108	11996801	32	118	290	1.11745	4.46628	7.65643	1.99887	2.77647	-	NN-NN
dyb-1	I	1489281	1490281	32	118	208	1.11745	4.46628	5.49151	1.99887	2.297	+	gt-ag
pqn-24	I	4565547	4565624	105	387	560	3.66662	14.6479	14.7848	1.99817	2.0116	+	gt-ag
mup-4	III	7486535	7486915	683	2517	2486	23.8505	95.2681	65.6341	1.99797	1.46043	-	NN-NN
C34H4.1	IV	1555702	1555954	235	866	993	8.20624	32.778	26.2167	1.99793	1.67569	+	gt-ag
F09G2.8	V	7191808	7193584	57	210	220	1.99045	7.94847	5.80833	1.99758	1.54503	-	NN-NN
Y47G6A.19	I	3527902	3528227	133	490	1132	4.64438	18.5464	29.8865	1.99758	2.68593	-	NN-NN
skpo-3	II	7247246	7247335	63	232	382	2.19997	8.78116	10.0854	1.99693	2.19671	+	gt-ag
D1043.1	II	11583850	11584088	85	313	121	2.96822	11.847	3.19458	1.99685	0.10603	+	gt-ag
sox-2	X	7460256	7460335	116	427	693	4.05074	16.1619	18.2962	1.99634	2.17529	-	NN-NN
grk-2	III	679293	679847	53	195	66	1.85077	7.38072	1.7425	1.99564	-0.0869682	+	gt-ag
T22B7.3	X	5647949	5649403	31	114	108	1.08253	4.31488	2.85136	1.99492	1.39725	+	gt-ag
mul-1	IV	4122378	4122896	65	239	216	2.26981	9.04611	5.70272	1.99472	1.32908	-	NN-NN
lev-9	X	6287045	6288821	34	125	36	1.18729	4.73123	0.950454	1.99455	-0.32098	-	NN-NN
F54C1.1	I	5008900	5009721	37	136	322	1.29205	5.14758	8.50128	1.99424	2.71802	+	gt-ag
tag-97	X	15372084	15372513	37	136	107	1.29205	5.14758	2.82496	1.99424	1.12857	-	NN-NN
ppk-3	X	12973442	12973602	40	147	229	1.39681	5.56393	6.04594	1.99397	2.11383	-	NN-NN
par-1	V	14118986	14120061	12	44	79	0.419042	1.66539	2.08572	1.9907	2.31538	-	NN-NN
H14E04.3	III	2385560	2385747	12	44	77	0.419042	1.66539	2.03291	1.9907	2.27838	-	NN-NN
polq-1	III	5793436	5793701	30	110	88	1.04761	4.16348	2.32333	1.9907	1.1491	-	NN-NN
F32B5.6	I	2669747	2670049	72	264	524	2.51425	9.99236	13.8344	1.9907	2.46006	+	gt-ag
asfl-1	I	9659719	9659817	21	77	76	0.733324	2.91444	2.00651	1.9907	1.45217	+	gt-ag
gbb-1	X	2960572	2961338	24	88	135	0.838084	3.33079	3.5642	1.9907	2.08841	+	gt-ag
csk-1	I	77799	79313	101	370	420	3.52694	14.0044	11.0886	1.9894	1.65259	+	gt-ag
ceh-37	X	14198571	14198671	83	304	325	2.89838	11.5064	8.58048	1.98911	1.56581	-	NN-NN
dpy-21	V	17946540	17947020	167	611	629	5.83167	23.1263	16.6065	1.98755	1.50977	-	NN-NN
C02E7.7	V	4918339	4918471	2630	9620	24011	91.8401	364.115	633.926	1.9872	2.78712	-	NN-NN
K10B3.5	X	3103929	3104220	32	117	49	1.11745	4.42843	1.29367	1.98659	0.211268	-	NN-NN
nas-9	V	4838773	4839324	107	391	491	3.73646	14.7993	12.9631	1.98578	1.79467	-	NN-NN
Y48G10A.4	I	13466733	13468872	156	570	226	5.44755	21.5744	5.96674	1.98564	0.131335	-	NN-NN
C42D4.18	IV	7167360	7167562	20	73	42	0.698404	2.76304	1.10886	1.98412	0.666947	+	gt-ag
bcc-1	IV	11086231	11086313	20	73	33	0.698404	2.76304	0.871249	1.98412	0.319024	-	NN-NN
let-355	I	5476595	5477072	120	438	346	4.19042	16.5782	9.13492	1.98412	1.1243	-	NN-NN
F35B3.7	X	17037441	17038074	17	62	208	0.593643	2.34669	5.49151	1.98296	3.20954	-	NN-NN
C50D2.9	II	90212	90543	85	310	464	2.96822	11.7335	12.2503	1.98296	2.04515	-	NN-NN
smg-1	I	6907020	6907116	68	248	410	2.37457	9.38676	10.8246	1.98296	2.18858	-	NN-NN
pgp-5	X	10858756	10858852	31	113	71	1.08253	4.27703	1.87451	1.98221	0.792109	-	NN-NN
Y54G2A.13	IV	2818057	2818261	28	102	24	0.977765	3.86068	0.633636	1.9813	-0.625834	-	NN-NN
T04A11.1	IV	12476551	12476953	271	987	1801	9.46337	37.3578	47.5491	1.98098	2.32899	-	NN-NN
Y95B8A.4	I	909420	909680	25	91	46	0.873005	3.44434	1.21447	1.98016	0.476264	+	gt-ag
gpx-5	X	9585057	9585476	269	979	1009	9.39353	37.055	26.6391	1.97993	1.50381	+	gt-ag
slc-36.3	V	20543926	20544073	11	40	32	0.384122	1.51399	0.844848	1.97872	1.13713	-	NN-NN
nas-30	I	946608	947157	66	240	316	2.30473	9.08396	8.34287	1.97872	1.85594	+	gt-ag
lrr-1	II	5034888	5035297	22	80	117	0.768244	3.02799	3.08897	1.97872	2.00749	-	NN-NN
R02F11.2	V	4795323	4795620	22	80	62	0.768244	3.02799	1.63689	1.97872	1.09132	+	gt-ag
C05A9.2	X	10843030	10843296	298	1083	740	10.4062	40.9914	19.5371	1.97787	0.908771	-	NN-NN
fbn-1	III	7633872	7636315	153	556	251	5.34279	21.0445	6.62677	1.97778	0.310714	+	gt-ag
W04A8.1	I	13837578	13838740	19	69	144	0.663484	2.61164	3.80181	1.97682	2.51856	-	NN-NN
T20D3.5	IV	9337975	9338099	84	305	265	2.9333	11.5442	6.9964	1.97657	1.25409	+	gt-ag
acd-1	I	4106952	4107041	62	225	33	2.16505	8.51621	0.871249	1.97581	-1.31324	+	gt-ag
mff-1	X	12986197	12986515	32	116	70	1.11745	4.39058	1.8481	1.97421	0.725841	-	NN-NN
dgk-4	IV	8635407	8635487	72	261	306	2.51425	9.87881	8.07886	1.97421	1.68402	+	gt-ag
fig-1	V	10973955	10974047	16	58	88	0.558723	2.19529	2.32333	1.97421	2.05599	-	NN-NN
cdh-1	III	2925352	2925781	40	145	224	1.39681	5.48823	5.91393	1.97421	2.08198	+	gt-ag
let-19	II	8779171	8779265	210	761	587	7.33324	28.8037	15.4977	1.97373	1.07953	+	gt-ag
frl-1	III	2138500	2140092	74	268	164	2.58409	10.1438	4.32984	1.97286	0.744657	+	gt-ag
K05B2.4	X	4919200	4919321	74	268	116	2.58409	10.1438	3.06257	1.97286	0.245086	-	NN-NN
F23B12.4	V	14442389	14443130	533	1930	2661	18.6125	73.0502	70.2544	1.97262	1.91632	+	gt-ag
cit-1.1	III	8008599	8008699	21	76	188	0.733324	2.87659	4.96348	1.97184	2.75883	-	NN-NN
ttm-2	II	4765479	4765652	63	228	122	2.19997	8.62976	3.22098	1.97184	0.550016	-	NN-NN
Y39B6A.43	V	18964440	18964911	34	123	167	1.18729	4.65553	4.40905	1.97128	1.8928	-	NN-NN
drl-1	IV	325406	328016	73	264	28	2.54917	9.99236	0.739242	1.9708	-1.78591	+	gt-ag
Y18H1A.7	I	718364	718657	13	47	72	0.453962	1.77894	1.90091	1.97038	2.06604	-	NN-NN
clc-5	X	7435032	7435361	36	130	154	1.25713	4.92048	4.06583	1.96867	1.69342	+	gt-ag
D1043.1	II	11584225	11584992	28	101	213	0.977765	3.82283	5.62352	1.96708	2.52391	+	gt-ag
ensh-1	X	8908302	8908726	28	101	38	0.977765	3.82283	1.00326	1.96708	0.0371307	+	gt-ag
R05H10.1	II	14852540	14852639	48	173	227	1.67617	6.54802	5.99314	1.96589	1.83814	+	gt-ag
C10H11.8	I	4737685	4738055	48	173	142	1.67617	6.54802	3.74901	1.96589	1.16134	-	NN-NN
Y50D4B.4	V	1094565	1098111	111	400	278	3.87614	15.1399	7.33961	1.96567	0.921083	+	gt-ag
K03H1.5	III	9938287	9938874	10	36	175	0.349202	1.36259	4.62026	1.96422	3.72584	+	gt-ag
ugt-37	V	7144777	7145161	15	54	10	0.523803	2.04389	0.264015	1.96422	-0.988404	-	NN-NN
F53B1.8	X	2127655	2127817	65	234	194	2.26981	8.85686	5.12189	1.96422	1.1741	-	NN-NN
egl-10	V	12460187	12462797	70	252	287	2.44441	9.53816	7.57723	1.96422	1.63218	-	NN-NN
snt-2	III	789691	789945	50	180	548	1.74601	6.81297	14.468	1.96422	3.05073	-	NN-NN
des-2	V	11418013	11418112	80	288	99	2.79361	10.9008	2.61375	1.96422	-0.0960133	-	NN-NN
hum-7	I	587658	588629	20	72	173	0.698404	2.72519	4.56746	1.96422	2.70926	-	NN-NN
F55D12.5	I	7907369	7907707	25	90	86	0.873005	3.40649	2.27053	1.96422	1.37897	-	NN-NN
hmit-1.1	V	18520685	18521213	148	532	806	5.16819	20.1361	21.2796	1.96206	2.04174	+	gt-ag
C48B4.13	III	9568950	9569195	27	97	150	0.942845	3.67143	3.96022	1.96125	2.07049	+	gt-ag
klp-4	X	3178096	3178173	66	237	99	2.30473	8.97041	2.61375	1.96058	0.181521	-	NN-NN
nhr-121	III	2453858	2454769	61	219	193	2.13013	8.28912	5.09549	1.96028	1.25828	-	NN-NN
F14B8.4	X	6898941	6899847	112	402	1107	3.91106	15.2156	29.2265	1.95992	2.90164	-	NN-NN
T10E9.3	I	6534191	6536131	129	463	444	4.5047	17.5245	11.7223	1.95987	1.37975	+	gt-ag
C39D10.7	X	7912775	7913784	34	122	69	1.18729	4.61768	1.8217	1.9595	0.61762	-	NN-NN
ggr-1	II	10701513	10701736	17	61	42	0.593643	2.30884	1.10886	1.9595	0.901413	+	gt-ag
mlt-7	II	4398659	4399543	743	2666	2773	25.9457	100.908	73.2113	1.95947	1.49657	+	gt-ag
nhx-9	IV	11935156	11935499	101	362	441	3.52694	13.7016	11.6431	1.95786	1.72298	+	gt-ag
clec-90	I	4845490	4846225	24	86	83	0.838084	3.25509	2.19132	1.95753	1.38664	+	gt-ag
aakg-3	X	2977422	2977798	24	86	35	0.838084	3.25509	0.924052	1.95753	0.140879	+	gt-ag
daf-1	IV	134422	135155	31	111	69	1.08253	4.20133	1.8217	1.95645	0.750886	+	gt-ag
Y6D1A.1	II	11822542	11822877	31	111	60	1.08253	4.20133	1.58409	1.95645	0.549252	-	NN-NN
fbxa-44	V	16889399	16889811	19	68	54	0.663484	2.57379	1.42568	1.95576	1.10352	+	gt-ag
plc-1	X	10800840	10801155	45	161	264	1.57141	6.09382	6.96999	1.95529	2.1491	-	NN-NN
F16C3.3	I	10155409	10155716	26	93	76	0.907925	3.52004	2.00651	1.95495	1.14405	+	gt-ag
F54A3.6	II	2231537	2231693	66	236	157	2.30473	8.93256	4.14503	1.95447	0.846785	-	NN-NN
lin-10	I	8117381	8117590	106	379	484	3.70154	14.3451	12.7783	1.95436	1.7875	-	NN-NN
osm-7	III	13576458	13577007	94	336	837	3.2825	12.7175	22.098	1.95395	2.75105	+	gt-ag
rig-3	X	6853716	6858312	68	243	285	2.37457	9.19751	7.52443	1.95358	1.66391	+	gt-ag
add-1	X	4856236	4856781	28	100	138	0.977765	3.78498	3.64341	1.95273	1.89773	-	NN-NN
eri-1	IV	419399	419617	63	225	264	2.19997	8.51621	6.96999	1.95273	1.66367	-	NN-NN
kvs-5	IV	749607	749791	156	557	306	5.44755	21.0824	8.07886	1.95236	0.568544	+	gt-ag
ceh-6	I	8500087	8502087	74	264	82	2.58409	9.99236	2.16492	1.95117	-0.255343	-	NN-NN
tbc-1	X	14971430	14971692	30	107	171	1.04761	4.04993	4.51466	1.9508	2.10752	+	gt-ag
dur-1	IV	9924333	9924470	23	82	30	0.803164	3.10369	0.792045	1.95022	-0.0201132	-	NN-NN
ncam-1	X	697440	699515	85	303	233	2.96822	11.4685	6.15155	1.95001	1.05135	+	gt-ag
pkg-2	IV	8535978	8536341	124	442	445	4.3301	16.7296	11.7487	1.94993	1.44002	+	gt-ag
spin-4	III	12695718	12697371	78	278	243	2.72377	10.5223	6.41556	1.94976	1.23597	+	gt-ag
mvk-1	III	6131747	6132778	105	374	291	3.66662	14.1558	7.68283	1.94887	1.06719	-	NN-NN
M70.4	IV	2254991	2255257	77	274	151	2.68885	10.3709	3.98663	1.94747	0.568176	-	NN-NN
C01F1.6	II	4286900	4287855	120	427	406	4.19042	16.1619	10.719	1.94743	1.355	-	NN-NN
dpy-21	V	17947087	17947631	115	409	304	4.01582	15.4806	8.02605	1.94669	0.998996	-	NN-NN
cutl-10	I	11295135	11295462	27	96	85	0.942845	3.63358	2.24413	1.9463	1.25106	-	NN-NN
H10E21.4	III	18133	18710	294	1045	1600	10.2665	39.5531	42.2424	1.94584	2.04074	-	NN-NN
rft-1	V	4440549	4440855	56	199	486	1.95553	7.53212	12.8311	1.9455	2.71402	-	NN-NN
mpz-1	II	10746895	10747055	38	135	141	1.32697	5.10973	3.72261	1.94511	1.48818	-	NN-NN
C35B8.3	X	9216224	9216401	49	174	157	1.71109	6.58587	4.14503	1.94446	1.27647	+	gt-ag
ajm-1	X	9109796	9109918	20	71	138	0.698404	2.68734	3.64341	1.94404	2.38315	+	gt-ag
ceh-58	II	10368679	10368881	40	142	27	1.39681	5.37468	0.71284	1.94404	-0.970482	-	NN-NN
F59D12.1	X	15669910	15671289	73	259	125	2.54917	9.80311	3.30019	1.94321	0.372518	+	gt-ag
mam-4	V	11249958	11250113	11	39	119	0.384122	1.47614	3.14178	1.9422	3.03194	+	gt-ag
Y32H12A.8	III	5392268	5392412	33	117	141	1.15237	4.42843	3.72261	1.9422	1.69172	-	NN-NN
magu-1	III	469885	470195	66	234	152	2.30473	8.85686	4.01303	1.9422	0.800092	-	NN-NN
gmps-1	II	10866609	10866728	44	156	141	1.53649	5.90458	3.72261	1.9422	1.27668	-	NN-NN
col-54	I	5843063	5843424	140	496	1355	4.88883	18.7735	35.774	1.94114	2.87135	+	gt-ag
cdh-1	III	2915760	2916482	107	379	396	3.73646	14.3451	10.455	1.94081	1.48445	+	gt-ag
egl-23	IV	14010048	14010222	24	85	83	0.838084	3.21724	2.19132	1.94065	1.38664	+	gt-ag
F43D9.1	III	10495547	10496387	65	230	251	2.26981	8.70546	6.62677	1.93935	1.54573	+	gt-ag
lin-38	II	13578315	13580014	93	329	279	3.24758	12.4526	7.36602	1.93901	1.18152	+	gt-ag
drh-2	IV	6616020	6616138	211	746	515	7.36816	28.236	13.5968	1.93816	0.883888	-	NN-NN
trpp-9	X	11564050	11564124	15	53	56	0.523803	2.00604	1.47848	1.93726	1.49702	+	gt-ag
B0403.5	X	7059145	7059424	150	530	1170	5.23803	20.0604	30.8897	1.93726	2.56003	+	gt-ag
Y62E10A.6	IV	13372283	13372441	120	424	198	4.19042	16.0483	5.2275	1.93726	0.319024	+	gt-ag
nas-30	I	946013	946220	45	159	139	1.57141	6.01812	3.66981	1.93726	1.22365	+	gt-ag
ZC455.1	V	12779178	12779302	51	180	330	1.78093	6.81297	8.71249	1.93565	2.29046	+	gt-ag
dkf-2	V	16758170	16759107	34	120	18	1.18729	4.54198	0.475227	1.93565	-1.32098	+	gt-ag
Y54E5A.7	I	14712821	14712906	53	187	383	1.85077	7.07792	10.1118	1.9352	2.44984	+	gt-ag
C08B6.4	V	10114955	10115166	21	74	90	0.733324	2.80089	2.37613	1.93336	1.69609	+	gt-ag
C41G7.8	I	9532458	9532747	94	331	543	3.2825	12.5283	14.336	1.93232	2.12678	-	NN-NN
vab-3	X	10516110	10516371	25	88	56	0.873005	3.33079	1.47848	1.9318	0.760057	+	gt-ag
nhr-40	X	2594109	2600806	52	183	121	1.81585	6.92652	3.19458	1.93149	0.814982	+	gt-ag
ncr-1	X	4477479	4478110	60	211	313	2.09521	7.98632	8.26367	1.93043	1.97969	-	NN-NN
B0403.5	X	7058597	7058767	122	429	942	4.26026	16.2376	24.8702	1.93032	2.5454	+	gt-ag
vha-7	IV	12643863	12644264	33	116	183	1.15237	4.39058	4.83147	1.92981	2.06786	+	gt-ag
K02E10.1	X	2497315	2497576	33	116	137	1.15237	4.39058	3.617	1.92981	1.6502	+	gt-ag
gly-2	I	6509358	6509430	39	137	21	1.36189	5.18543	0.554431	1.92886	-1.29653	+	gt-ag
Y39G8C.2	II	14095860	14096265	41	144	57	1.43173	5.45038	1.50489	1.9286	0.0718962	-	NN-NN
puf-10	I	215316	215387	170	597	374	5.93643	22.5964	9.87416	1.92842	0.734062	-	NN-NN
mpst-7	V	12955442	12958694	90	316	210	3.14282	11.9605	5.54431	1.92815	0.818951	-	NN-NN
gei-1	III	3346744	3347016	10	35	133	0.349202	1.32474	3.5114	1.92358	3.32991	+	gt-ag
ZC247.2	I	10256677	10257253	10	35	36	0.349202	1.32474	0.950454	1.92358	1.44456	-	NN-NN
fbxa-61	III	1239411	1241125	14	49	118	0.488883	1.85464	3.11538	1.92358	2.67185	+	gt-ag
F46F2.5	X	15264570	15265670	14	49	84	0.488883	1.85464	2.21773	1.92358	2.18152	+	gt-ag
sea-2	II	3970739	3970901	20	70	40	0.698404	2.64949	1.05606	1.92358	0.596558	+	gt-ag
F53B6.13	I	8949681	8951627	20	70	26	0.698404	2.64949	0.686439	1.92358	-0.0249302	-	NN-NN
glt-3	IV	10131305	10131927	58	203	133	2.02537	7.68352	3.5114	1.92358	0.79386	+	gt-ag
K01A2.3	II	314693	314855	18	63	99	0.628563	2.38454	2.61375	1.92358	2.05599	+	gt-ag
K01A2.3	II	314565	314655	18	63	55	0.628563	2.38454	1.45208	1.92358	1.20799	+	gt-ag
Y39F10B.1	II	725776	726810	36	126	93	1.25713	4.76908	2.45534	1.92358	0.965792	+	gt-ag
ddx-35	III	1551632	1552607	36	126	64	1.25713	4.76908	1.6897	1.92358	0.426633	-	NN-NN
abts-4	X	6760478	6761496	40	140	87	1.39681	5.29898	2.29693	1.92358	0.717574	-	NN-NN
K07E8.7	II	641499	642057	24	84	144	0.838084	3.17939	3.80181	1.92358	2.18152	-	NN-NN
unc-93	III	3646359	3646612	24	84	14	0.838084	3.17939	0.369621	1.92358	-1.18105	+	gt-ag
npr-20	II	8864755	8865033	26	91	167	0.907925	3.44434	4.40905	1.92358	2.27982	-	NN-NN
ulp-4	II	8130387	8130552	117	409	722	4.08566	15.4806	19.0619	1.92182	2.22205	+	gt-ag
C34C6.2	II	8683293	8684275	77	269	29	2.68885	10.1816	0.765643	1.9209	-1.81225	-	NN-NN
cyp-33C9	V	3092591	3093260	75	262	200	2.61901	9.91666	5.2803	1.92083	1.0116	-	NN-NN
K07E1.1	II	4551529	4551863	728	2543	3865	25.4219	96.2521	102.042	1.92075	2.00502	+	gt-ag
F42A9.6	IV	8609309	8609426	118	412	618	4.12058	15.5941	16.3161	1.92008	1.98538	+	gt-ag
K10D6.4	V	11211853	11214943	55	192	70	1.92061	7.26717	1.8481	1.91983	-0.0555185	+	gt-ag
best-22	IV	12350087	12350655	51	178	287	1.78093	6.73727	7.57723	1.91953	2.08904	+	gt-ag
F47G3.1	X	2390317	2390501	51	178	117	1.78093	6.73727	3.08897	1.91953	0.794498	+	gt-ag
csk-1	I	77153	77713	43	150	202	1.50157	5.67748	5.3331	1.91878	1.8285	+	gt-ag
bre-5	IV	12051070	12051168	35	122	142	1.22221	4.61768	3.74901	1.91768	1.61702	-	NN-NN
plc-1	X	10803150	10805636	70	244	239	2.44441	9.23536	6.30996	1.91768	1.36814	-	NN-NN
C50D2.6	II	85217	85391	35	122	74	1.22221	4.61768	1.95371	1.91768	0.676729	+	gt-ag
gst-16	II	13623523	13624298	33	115	133	1.15237	4.35273	3.5114	1.91732	1.60745	-	NN-NN
F28H6.4	X	14132124	14132826	33	115	97	1.15237	4.35273	2.56094	1.91732	1.15208	+	gt-ag
twk-8	IV	9083376	9083720	58	202	370	2.02537	7.64567	9.76855	1.91646	2.26996	+	gt-ag
snt-1	II	6815437	6815523	83	289	63	2.89838	10.9386	1.66329	1.91611	-0.801201	+	gt-ag
C04F12.8	I	9698510	9699127	27	94	57	0.942845	3.55789	1.50489	1.91593	0.674561	-	NN-NN
ctsa-2	III	6612754	6612971	175	609	609	6.11103	23.0506	16.0785	1.91531	1.39565	+	gt-ag
dex-1	III	5531262	5531597	25	87	92	0.873005	3.29294	2.42894	1.91531	1.47626	+	gt-ag
JC8.2	IV	13233339	13234354	121	421	353	4.22534	15.9348	9.31973	1.91504	1.14122	-	NN-NN
stip-1	II	10349785	10349889	46	160	140	1.60633	6.05597	3.69621	1.91459	1.20228	-	NN-NN
C17D12.7	I	11606636	11606907	157	546	337	5.48247	20.666	8.8973	1.91436	0.698542	-	NN-NN
tax-6	IV	10495266	10497968	44	153	245	1.53649	5.79103	6.46837	1.91418	2.07376	-	NN-NN
mlk-1	V	5062886	5063857	107	372	114	3.73646	14.0801	3.00977	1.91392	-0.312019	-	NN-NN
dig-1	III	6783581	6784158	21	73	66	0.733324	2.76304	1.7425	1.91373	1.24863	+	gt-ag
cof-2	I	6251660	6251919	21	73	18	0.733324	2.76304	0.475227	1.91373	-0.625834	+	gt-ag
tbc-13	X	12488124	12488373	84	292	510	2.9333	11.0522	13.4648	1.91373	2.19859	+	gt-ag
magu-1	III	470407	471012	61	212	224	2.13013	8.02417	5.91393	1.91341	1.47318	-	NN-NN
frm-7	V	12303374	12303453	158	548	455	5.51739	20.7417	12.0127	1.91048	1.1225	+	gt-ag
mics-1	V	10578137	10578258	30	104	148	1.04761	3.93638	3.90742	1.90978	1.89912	-	NN-NN
ephx-1	II	4009737	4010996	15	52	33	0.523803	1.96819	0.871249	1.90978	0.734062	+	gt-ag
nid-1	V	12914135	12914441	45	156	102	1.57141	5.90458	2.69295	1.90978	0.77713	+	gt-ag
hmit-1.1	V	18516891	18517517	71	246	290	2.47933	9.31106	7.65643	1.90899	1.62672	+	gt-ag
M01G5.1	III	1504288	1506094	84	291	151	2.9333	11.0143	3.98663	1.90878	0.442645	+	gt-ag
T07C4.10	III	10324419	10324519	91	315	311	3.17774	11.9227	8.21086	1.90764	1.36953	+	gt-ag
frm-8	III	3205783	3206599	26	90	209	0.907925	3.40649	5.51791	1.90764	2.60348	-	NN-NN
math-22	II	1906387	1907391	35	121	137	1.22221	4.57983	3.617	1.90581	1.56531	+	gt-ag
D1044.6	III	5536724	5536889	35	121	111	1.22221	4.57983	2.93057	1.90581	1.26169	-	NN-NN
hlh-2	I	7191362	7191530	11	38	23	0.384122	1.43829	0.607234	1.90472	0.660688	-	NN-NN
F31E3.2	III	6977545	6977836	66	228	392	2.30473	8.62976	10.3494	1.90472	2.16687	+	gt-ag
C26F1.1	V	7786858	7786987	183	632	1105	6.39039	23.9211	29.1736	1.90431	2.19069	+	gt-ag
pash-1	I	10600320	10600601	73	252	50	2.54917	9.53816	1.32007	1.90368	-0.94941	+	gt-ag
daf-12	X	10644550	10645838	175	604	451	6.11103	22.8613	11.9071	1.90342	0.962331	+	gt-ag
F10D11.6	I	8447509	8447793	142	490	1241	4.95867	18.5464	32.7643	1.90312	2.7241	-	NN-NN
cand-1	V	16811944	16812718	162	559	566	5.65707	21.1581	14.9432	1.90308	1.40137	+	gt-ag
F47E1.17,linc-22	X	9069353	9069483	40	138	114	1.39681	5.22328	3.00977	1.90282	1.10752	+	gt-ag
madf-2	I	11276992	11277499	49	169	162	1.71109	6.39662	4.27704	1.9024	1.3217	-	NN-NN
cpg-4	V	5998774	5998888	29	100	121	1.01269	3.78498	3.19458	1.9021	1.65744	+	gt-ag
W09H1.4	II	13185364	13185696	29	100	118	1.01269	3.78498	3.11538	1.9021	1.62122	+	gt-ag
nhr-64	I	3108324	3108509	38	131	184	1.32697	4.95833	4.85787	1.90172	1.87219	+	gt-ag
rnp-8	I	365191	365531	38	131	182	1.32697	4.95833	4.80507	1.90172	1.85643	+	gt-ag
unc-82	IV	7442897	7443052	47	162	231	1.64125	6.13167	6.09874	1.90149	1.89372	+	gt-ag
C05D2.10	III	5598941	5599323	74	255	330	2.58409	9.65171	8.71249	1.90113	1.75343	-	NN-NN
Y52B11A.10	I	11046368	11047425	83	286	168	2.89838	10.8251	4.43545	1.90106	0.613836	+	gt-ag
hpo-38	III	232444	234713	54	186	115	1.88569	7.04007	3.03617	1.9005	0.687161	+	gt-ag
sms-1	IV	11484137	11484421	210	723	746	7.33324	27.3654	19.6955	1.89983	1.42534	-	NN-NN
cyb-2.1	IV	10986339	10986428	59	203	133	2.06029	7.68352	3.5114	1.89892	0.769198	+	gt-ag
mpz-1	II	10751831	10752126	114	392	449	3.9809	14.8371	11.8543	1.89805	1.57424	-	NN-NN
mlt-7	II	4402943	4403750	178	612	1126	6.21579	23.1641	29.7281	1.89788	2.25782	+	gt-ag
mrp-7	V	19676235	19677204	64	220	371	2.23489	8.32697	9.79495	1.89759	2.13183	+	gt-ag
ncx-3	IV	10718447	10718859	16	55	53	0.558723	2.08174	1.39928	1.89759	1.32448	+	gt-ag
Y75B8A.3	III	12105469	12106340	174	598	452	6.07611	22.6342	11.9335	1.89728	0.973794	-	NN-NN
T07D3.9	II	899737	899817	126	433	345	4.39994	16.389	9.10851	1.89717	1.04973	-	NN-NN
pqn-27	II	13451834	13453622	110	378	277	3.84122	14.3072	7.31321	1.89711	0.928941	-	NN-NN
ZC434.9	I	10357259	10357391	234	804	851	8.17132	30.4313	22.4677	1.89691	1.45921	+	gt-ag
rgr-1	III	9395379	9395477	93	319	273	3.24758	12.0741	7.20761	1.89448	1.15016	+	gt-ag
atm-1	I	197653	197959	28	96	171	0.977765	3.63358	4.51466	1.89383	2.20706	+	gt-ag
ins-3	II	5990391	5990473	14	48	26	0.488883	1.81679	0.686439	1.89383	0.489643	-	NN-NN
gar-2	III	6314926	6315304	35	120	121	1.22221	4.54198	3.19458	1.89383	1.38614	+	gt-ag
otub-2	I	403717	406063	98	336	348	3.42218	12.7175	9.18772	1.89383	1.42479	+	gt-ag
skpo-3	II	7246141	7246293	319	1093	1869	11.1395	41.3699	49.3444	1.89289	2.1472	+	gt-ag
C29F9.4	III	121207	122681	40	137	140	1.39681	5.18543	3.69621	1.89233	1.40391	+	gt-ag
B0034.1	II	5972101	5972204	33	113	260	1.15237	4.27703	6.86439	1.89201	2.57453	+	gt-ag
ttc-7	III	1870709	1871710	78	267	290	2.72377	10.1059	7.65643	1.89152	1.49107	+	gt-ag
ZC434.9	I	10359135	10359424	26	89	321	0.907925	3.36864	8.47488	1.89152	3.22255	+	gt-ag
ceh-38	II	6952615	6952744	100	342	370	3.49202	12.9446	9.76855	1.89022	1.48408	+	gt-ag
F57A8.1	V	10044465	10045616	255	872	504	8.90465	33.0051	13.3064	1.89006	0.579485	+	gt-ag
add-1	X	4859701	4859938	55	188	116	1.92061	7.11577	3.06257	1.88946	0.673179	-	NN-NN
F52D10.6	X	11584262	11584648	12	41	28	0.419042	1.55184	0.739242	1.88882	0.818951	+	gt-ag
mre-11	V	10736671	10736815	24	82	75	0.838084	3.10369	1.98011	1.88882	1.24041	-	NN-NN
twk-24	V	12268694	12269182	29	99	296	1.01269	3.74713	7.81484	1.8876	2.94803	-	NN-NN
gpa-1	V	11174757	11174930	46	157	29	1.60633	5.94243	0.765643	1.88728	-1.06902	-	NN-NN
K11E4.2	X	13718226	13718618	17	58	116	0.593643	2.19529	3.06257	1.88674	2.36708	+	gt-ag
Y54G2A.7	IV	2838963	2839035	78	266	175	2.72377	10.0681	4.62026	1.88611	0.762367	+	gt-ag
hst-2	X	11205307	11205791	44	150	185	1.53649	5.67748	4.88428	1.88561	1.66851	-	NN-NN
nhx-5	X	10578708	10578964	69	235	160	2.40949	8.89471	4.22424	1.88422	0.809962	+	gt-ag
mlp-1	III	5972976	5973307	79	269	201	2.75869	10.1816	5.3067	1.88391	0.943829	-	NN-NN
fem-1	IV	5535052	5536526	82	279	287	2.86346	10.5601	7.57723	1.8828	1.40391	-	NN-NN
F33A8.10	II	11038015	11038797	10	34	30	0.349202	1.28689	0.792045	1.88176	1.18152	+	gt-ag
glct-6	IV	3785346	3791588	10	34	19	0.349202	1.28689	0.501628	1.88176	0.522558	+	gt-ag
F55H12.3	I	8891084	8891159	30	102	238	1.04761	3.86068	6.28355	1.88176	2.58449	+	gt-ag
daf-28	V	19815646	19816056	30	102	33	1.04761	3.86068	0.871249	1.88176	-0.265938	+	gt-ag
cls-1	III	7512441	7512674	95	323	138	3.31742	12.2255	3.64341	1.88176	0.135227	+	gt-ag
tcl-2	IV	180196	180406	35	119	55	1.22221	4.50413	1.45208	1.88176	0.248635	+	gt-ag
unc-3	X	14782260	14782978	20	68	22	0.698404	2.57379	0.580833	1.88176	-0.265938	+	gt-ag
ist-1	X	7132336	7132891	38	129	74	1.32697	4.88263	1.95371	1.87953	0.558084	+	gt-ag
F09F9.1	X	4115641	4116563	33	112	177	1.15237	4.23918	4.67306	1.87919	2.01977	+	gt-ag
fncm-1	I	5191120	5191614	33	112	69	1.15237	4.23918	1.8217	1.87919	0.660688	+	gt-ag
rilp-1	III	3641456	3642014	28	95	141	0.977765	3.59573	3.72261	1.87873	1.92875	+	gt-ag
T16G1.5	V	12938296	12938395	28	95	15	0.977765	3.59573	0.396022	1.87873	-1.30391	-	NN-NN
ptr-12	I	2594064	2594282	41	139	197	1.43173	5.26113	5.20109	1.87762	1.86106	-	NN-NN
unc-82	IV	7437859	7438188	41	139	112	1.43173	5.26113	2.95697	1.87762	1.04636	+	gt-ag
rab-3	II	5723289	5724659	100	339	312	3.49202	12.8311	8.23727	1.87751	1.2381	-	NN-NN
cgt-2	X	17695319	17696473	18	61	48	0.628563	2.30884	1.26727	1.87704	1.0116	+	gt-ag
ncs-6	II	3526473	3526768	18	61	20	0.628563	2.30884	0.52803	1.87704	-0.251439	-	NN-NN
W05F2.4	I	3384007	3386351	49	166	31	1.71109	6.28307	0.818446	1.87656	-1.06396	-	NN-NN
exc-7	II	9576367	9578289	31	105	134	1.08253	3.97423	3.5378	1.87628	1.70845	+	gt-ag
pgp-10	X	7160411	7160751	75	254	125	2.61901	9.61386	3.30019	1.87609	0.333524	+	gt-ag
Y71F9AL.4	I	2906521	2907278	13	44	67	0.453962	1.66539	1.7689	1.87522	1.96221	+	gt-ag
H35B03.2	IV	5731549	5731640	13	44	14	0.453962	1.66539	0.369621	1.87522	-0.296527	-	NN-NN
sym-4	X	14166011	14166164	39	132	174	1.36189	4.99618	4.59386	1.87522	1.7541	-	NN-NN
rad-54	I	9069331	9069453	39	132	18	1.36189	4.99618	0.475227	1.87522	-1.51892	+	gt-ag
Y79H2A.3	III	12051241	12051808	94	318	116	3.2825	12.0362	3.06257	1.87452	-0.10005	-	NN-NN
Y54E10BR.1	I	3068222	3069029	34	115	78	1.18729	4.35273	2.05932	1.87425	0.794498	+	gt-ag
hst-3.2	X	2919551	2923755	21	71	239	0.733324	2.68734	6.30996	1.87366	3.10511	-	NN-NN
T01D3.1	V	13691693	13691777	21	71	90	0.733324	2.68734	2.37613	1.87366	1.69609	+	gt-ag
mam-8	I	6454367	6454904	21	71	67	0.733324	2.68734	1.7689	1.87366	1.27033	-	NN-NN
math-27	II	1768404	1768684	21	71	26	0.733324	2.68734	0.686439	1.87366	-0.0953196	+	gt-ag
mrp-8	III	12295019	12295622	50	169	150	1.74601	6.39662	3.96022	1.87325	1.18152	-	NN-NN
nhr-184	V	2213812	2213927	45	152	142	1.57141	5.75318	3.74901	1.8723	1.25445	-	NN-NN
set-24	II	12117928	12118361	61	206	72	2.13013	7.79707	1.90091	1.87199	-0.164254	-	NN-NN
atm-1	I	193095	193589	56	189	197	1.95553	7.15362	5.20109	1.87111	1.41126	+	gt-ag
unc-57	I	4677724	4678568	132	445	240	4.60946	16.8432	6.33636	1.86949	0.459055	+	gt-ag
C14B4.2	V	19345770	19346912	97	327	457	3.38726	12.3769	12.0655	1.86946	1.8327	-	NN-NN
C03B1.13	X	6336632	6337125	54	182	109	1.88569	6.88867	2.87776	1.86913	0.609855	-	NN-NN
lgl-1	X	865214	865606	108	364	356	3.77138	13.7773	9.39893	1.86913	1.3174	-	NN-NN
T10E9.3	I	6536459	6536571	27	91	240	0.942845	3.44434	6.33636	1.86913	2.74856	+	gt-ag
lron-8	I	5771599	5772550	203	684	777	7.0888	25.8893	20.514	1.86874	1.53299	+	gt-ag
syd-9	X	7224212	7225442	65	219	82	2.26981	8.28912	2.16492	1.86865	-0.0682577	+	gt-ag
ugt-2	V	10399940	10400016	158	532	682	5.51739	20.1361	18.0058	1.86773	1.70641	+	gt-ag
H35B03.1	IV	5726760	5726916	33	111	162	1.15237	4.20133	4.27704	1.86625	1.89201	+	gt-ag
F18E9.3	X	8586573	8587082	231	777	1313	8.06656	29.4093	34.6652	1.86625	2.10346	+	gt-ag
rabs-5	IV	8104670	8105164	22	74	154	0.768244	2.80089	4.06583	1.86625	2.40391	-	NN-NN
T25B9.8	IV	10766631	10766714	22	74	72	0.768244	2.80089	1.90091	1.86625	1.30705	-	NN-NN
C14A4.12	II	10613431	10613993	50	168	75	1.74601	6.35877	1.98011	1.86469	0.181521	+	gt-ag
sql-1	III	12517295	12519970	198	665	609	6.9142	25.1701	16.0785	1.86408	1.2175	+	gt-ag
ptr-8	II	10890880	10891224	221	742	571	7.71736	28.0846	15.0753	1.8636	0.966003	+	gt-ag
C13E3.1	X	8897496	8897953	14	47	54	0.488883	1.77894	1.42568	1.86346	1.54409	+	gt-ag
R05D7.5	I	12186906	12187071	42	141	64	1.46665	5.33683	1.6897	1.86346	0.204241	+	gt-ag
T28D6.4	III	11363390	11363902	59	198	210	2.06029	7.49427	5.54431	1.86294	1.42816	+	gt-ag
[truncated: 30,698 more rows]

## Sheet: NDA
Gene	Chromosome	Start	End	Splice junction score wt	Splice junction score alg-1	Splice junction score alg-2	Normalized wt	Normalized alg-1	Normalized alg-2	log2 fold change alg-1/wt	log5 fold change alg-2/wt	Strand	Splice site
F07B7.12,rpm-1	V	8818463	8860696	13	199	219	0.453962	7.53212	5.78193	4.05241	3.67091	-	NN-NN
T28C12.4,T28C12.5	V	6314701	6324404	22	292	225	0.768244	11.0522	5.94034	3.84662	2.95091	+	gt-ag
F20E11.17,F20E11.18,F20E11.5,F31E9.11,F31E9.6,F31E9.t1,K10G4.13,K10G4.16,K10G4.3,K10G4.4,K10G4.5,T27C5.10,T27C5.6,Y20C6A.1,Y68A4A.13,Y68A4B.3,clec-242,clec-243,fbxa-134,fbxa-180,fbxa-188,lsy-27,sdz-16,srh-109,srh-112,srh-116,srh-203,srh-236,srh-252,srsx-2	V	17207674	17469170	17	222	42	0.593643	8.40266	1.10886	3.82318	0.901413	-	NN-NN
F20B10.2,nlr-1	IV	12174893	12183631	15	168	53	0.523803	6.35877	1.39928	3.60165	1.41759	-	NN-NN
F56A4.10,F56A4.11,F56A4.12,F56A4.6,Y19D10A.11,irld-35,mct-1,srd-71,str-119,str-265,str-267	V	2372548	2481240	20	211	41	0.698404	7.98632	1.08246	3.5154	0.632182	-	NN-NN
vit-3,vit-4	X	3559340	3567954	33	322	36	1.15237	12.1876	0.950454	3.40275	-0.277911	-	NN-NN
tmc-1	X	1174607	1175169	13	124	139	0.453962	4.69338	3.66981	3.36998	3.01506	+	gt-ag
W08E12.3,W08E12.4	IV	3302734	3304378	133	1223	1090	4.64438	46.2904	28.7776	3.31715	2.63139	+	gt-ag
R11A8.1	IV	10356732	10356912	35	310	45	1.22221	11.7335	1.18807	3.26307	-0.0408718	-	NN-NN
W08E12.4,W08E12.5	IV	3301142	3302786	431	3678	2889	15.0506	139.212	76.2739	3.20939	2.34137	+	gt-ag
col-142,col-143	V	6831981	6836500	38	309	525	1.32697	11.6956	13.8608	3.13976	3.3848	+	gt-ag
pgp-6,pgp-7	X	10869543	10875614	21	157	81	0.733324	5.94243	2.13852	3.01853	1.54409	-	NN-NN
C26D10.7,eff-1	II	8335838	8348244	58	417	294	2.02537	15.7834	7.76204	2.96215	1.93825	+	gt-ag
ZC262.10,ZC262.11,ZC262.5,ZC262.7,ZC262.9	III	8338213	8346656	105	746	726	3.66662	28.236	19.1675	2.94501	2.38614	-	NN-NN
D2096.11,D2096.16,M116.5,sdz-25	IV	8392012	8417881	27	188	160	0.942845	7.11577	4.22424	2.91593	2.1636	-	NN-NN
H23N18.4,ugt-13,ugt-14,ugt-8,ugt-9	V	4896205	4909088	19	129	172	0.663484	4.88263	4.54106	2.87953	2.7749	+	gt-ag
lgx-1	X	5535871	5536499	12	81	152	0.419042	3.06584	4.01303	2.87111	3.25952	-	NN-NN
C12D8.1,C12D8.15,fipr-4,fipr-8	V	10228304	10239901	39	254	462	1.36189	9.61386	12.1975	2.81951	3.1629	-	NN-NN
B0034.2,B0034.4,B0034.5,C18A3.10,C18A3.7,C25H3.10,C25H3.11,C25H3.18,C25H3.8,C25H3.9,F10C1.3,F10C1.9,F55C12.4,F55C12.5,F55C12.6,H41C03.2,K05F1.10,K05F1.8,K05F1.9,R12C12.10,R12C12.4,R12C12.5,R12C12.6,R12C12.7,R12C12.8,R12C12.9,ZK1248.11,ZK1248.13,ZK1248.15,	II	5676472	6060677	36	231	115	1.25713	8.74331	3.03617	2.79805	1.27212	-	NN-NN
W08E12.3,W08E12.4,W08E12.5	IV	3301142	3304378	133	791	920	4.64438	29.9392	24.2894	2.68848	2.38677	+	gt-ag
abu-6,abu-7	V	5161619	5164535	37	219	856	1.29205	8.28912	22.5997	2.68156	4.12857	-	NN-NN
nlp-30,nlp-31	V	3980268	3982521	13	74	70	0.453962	2.80089	1.8481	2.62524	2.0254	+	gt-ag
col-93,col-94	III	10985446	10987750	4824	27188	34534	168.455	1029.06	911.749	2.61089	2.43627	-	NN-NN
F07B7.1,F07B7.2,W09B7.1	V	8831269	8873458	32	178	27	1.11745	6.73727	0.71284	2.59196	-0.648554	+	gc-ag
rbf-1	III	6698910	6699244	16	89	35	0.558723	3.36864	0.924052	2.59196	0.725841	+	gt-ag
F07B7.1,F07B7.2,W09B7.1	V	8830844	8873007	92	490	161	3.21266	18.5464	4.25064	2.5293	0.403913	+	gt-ag
Y45F10B.8,Y45F10B.9,tsp-5	IV	13577487	13597289	12	63	46	0.419042	2.38454	1.21447	2.50854	1.53516	-	NN-NN
F20B10.2,nlr-1	IV	12175459	12183815	27	135	100	0.942845	5.10973	2.64015	2.43815	1.48553	-	NN-NN
sir-2.2,sir-2.3	X	13329900	13332677	47	232	116	1.64125	8.78116	3.06257	2.41962	0.89995	+	gt-ag
D2096.11,D2096.16,M116.5,sdz-25	IV	8392283	8417430	10	48	41	0.349202	1.81679	1.08246	2.37926	1.63218	-	NN-NN
D2096.11,D2096.16,M116.5,sdz-25	IV	8392283	8416668	10	48	23	0.349202	1.81679	0.607234	2.37926	0.798192	-	NN-NN
AC8.10,AC8.11,AC8.3,AC8.9	X	228606	238064	14	66	122	0.488883	2.49809	3.22098	2.35327	2.71994	-	NN-NN
srp-5,srp-6	V	7382385	7384726	10	47	52	0.349202	1.77894	1.37288	2.34889	1.97507	-	NN-NN
mec-8	I	9441518	9443037	62	290	368	2.16505	10.9765	9.71575	2.34194	2.16592	-	NN-NN
Y9D1A.1	II	7447437	7448295	13	59	31	0.453962	2.23314	0.818446	2.29843	0.850315	+	gt-ag
fipr-6,fipr-7	V	10229856	10231329	124	553	755	4.3301	20.931	19.9331	2.27317	2.20269	+	gt-ag
btb-19,btb-20	II	14521555	14522985	11	49	208	0.384122	1.85464	5.49151	2.2715	3.83757	-	NN-NN
K07E8.7	II	650184	650319	25	110	14	0.873005	4.16348	0.369621	2.25373	-1.23994	-	NN-NN
C01G12.3,C01G12.5,nspb-10,nspb-8	II	14580556	14588228	26	114	118	0.907925	4.31488	3.11538	2.24868	1.77876	-	NN-NN
F45D11.1,K02E7.6,K02E7.7,math-34,str-148	II	1022914	1058755	22	96	42	0.768244	3.63358	1.10886	2.24176	0.529444	+	gt-ag
C55B7.10,T05E7.4,T09B4.7,ZC328.5,cdc-25.1,dbr-1,ech-1.2,klu-2,mam-8,mdt-18,mut-2,nmtn-1	I	6161040	6503268	12	52	10	0.419042	1.96819	0.264015	2.2317	-0.666476	-	NN-NN
C09F9.7,glna-1	II	14715183	14722303	68	294	738	2.37457	11.1279	19.4843	2.22844	3.03657	-	NN-NN
col-39,col-80	II	10705062	10707407	59	249	211	2.06029	9.42461	5.57071	2.19358	1.43501	+	gt-ag
T04A11.1,T04A11.2,T04A11.4	IV	12475432	12483029	166	653	984	5.79675	24.7159	25.9791	2.09213	2.16403	-	NN-NN
col-12,col-13	V	10421627	10424798	4142	15936	31689	144.639	603.175	836.637	2.06012	2.53214	-	NN-NN
ZC262.10,ZC262.11,ZC262.5,ZC262.7,ZC262.9	III	8337768	8346317	56	215	215	1.95553	8.13772	5.67632	2.05706	1.5374	-	NN-NN
Y58A7A.3,Y58A7A.4	V	5079537	5083719	265	1009	827	9.25385	38.1905	21.834	2.04509	1.23845	-	NN-NN
C53C7.5	X	13043978	13045200	15	57	34	0.523803	2.15744	0.897651	2.04223	0.77713	+	gt-ag
F55C10.4,K03B8.14,K03B8.6,T11F9.1,T11F9.22,T11F9.7,col-154,col-157,dmsr-1,grl-3,mig-17,nas-16,nas-17,nas-18,nas-21,nas-22,tag-140	V	11385538	11484261	768	2918	7401	26.8187	110.446	195.397	2.04203	2.8651	+	gt-ag
twk-17	X	7600466	7600946	33	124	59	1.15237	4.69338	1.55769	2.02603	0.434807	-	NN-NN
C14H10.2	X	10249322	10250920	65	244	144	2.26981	9.23536	3.80181	2.0246	0.744115	-	NN-NN
F40F12.7,F40F12.8,cbp-2	III	9915513	9924596	52	195	227	1.81585	7.38072	5.99314	2.02312	1.72267	+	gt-ag
Y54G2A.37,clec-80	IV	2823245	2827818	32	119	127	1.11745	4.50413	3.35299	2.01104	1.58524	+	gt-ag
K11H3.8	III	9835708	9837245	25	92	100	0.873005	3.48219	2.64015	1.99593	1.59656	+	gt-ag
nspb-2,nspb-5	IV	6591913	6599439	13	47	127	0.453962	1.77894	3.35299	1.97038	2.8848	+	gt-ag
ZK250.2,math-20,math-21,math-24,math-44	II	1900894	1997246	32	115	132	1.11745	4.35273	3.485	1.96172	1.64095	+	gt-ag
F52C6.2,F52C6.3,F52C6.4,ZK250.2,bath-22,math-20,math-21,math-23,math-30,math-44	II	1902928	1997246	32	115	116	1.11745	4.35273	3.06257	1.96172	1.45454	+	gt-ag
K08D10.9,R07C12.4	IV	4151257	4158364	42	150	58	1.46665	5.67748	1.53129	1.95273	0.0622217	+	gt-ag
inx-16	I	4164309	4164709	23	82	122	0.803164	3.10369	3.22098	1.95022	2.00373	+	gt-ag
unc-89	I	4062460	4064920	24	85	32	0.838084	3.21724	0.844848	1.94065	0.0115957	+	gt-ag
dig-1	III	6774107	6784158	21	73	66	0.733324	2.76304	1.7425	1.91373	1.24863	+	gt-ag
math-26,math-27	II	1770452	1774332	14	48	74	0.488883	1.81679	1.95371	1.89383	1.99866	+	gt-ag
col-92,col-93,col-94	III	10983033	10987750	412	1391	3325	14.3871	52.6491	87.785	1.87163	2.6092	-	NN-NN
fbf-1,fbf-2	II	6078996	6089683	35	117	39	1.22221	4.42843	1.02966	1.85731	-0.247323	-	NN-NN
col-144,col-145	V	9160468	9162879	1205	3937	5574	42.0788	149.015	147.162	1.82429	1.80624	-	NN-NN
D2045.2,D2045.5,H04D03.6,K01G5.8,T21C12.3,T21C12.4,T21C12.8,W09D10.1,W09D10.4,W09D10.5,Y39A1A.17,Y39A1A.18,Y39A1A.2,Y39A1A.20,Y39A1A.21,Y39A1A.22,Y39A1A.3,Y39A1A.9,Y45F3A.1,Y45F3A.4,Y45F3A.5,Y45F3A.8,Y45F3A.9,dhs-11,epg-6,hpl-2,linc-109,lron-10,rab-33,ran	III	10438421	10752960	12	39	40	0.419042	1.47614	1.05606	1.81667	1.33352	-	NN-NN
C28A5.1,C28A5.2	III	4432901	4438205	61	198	106	2.13013	7.49427	2.79856	1.81485	0.393741	-	NN-NN
AH10.3,par-1	V	14133295	14145041	114	364	108	3.9809	13.7773	2.85136	1.79113	-0.481444	-	NN-NN
F41G3.10,F41G3.19,F41G3.20,F41G3.21	II	6749073	6752739	16	51	63	0.558723	1.93034	1.66329	1.78865	1.57384	-	NN-NN
C04E12.4,C04E12.5,F35F10.4,srbc-3	V	3292415	3368186	33	105	141	1.15237	3.97423	3.72261	1.78608	1.69172	+	gt-ag
pmp-1,pmp-2	II	6880935	6884904	33	105	78	1.15237	3.97423	2.05932	1.78608	0.837566	-	NN-NN
C25F9.14,C25F9.16,C25F9.9,M04C3.5	V	19416698	19450656	60	190	47	2.09521	7.19147	1.24087	1.77919	-0.755744	+	gt-ag
C28A5.1,C28A5.2	III	4432643	4437889	85	267	193	2.96822	10.1059	5.09549	1.76753	0.779624	-	NN-NN
col-92,col-93	III	10983033	10985504	542	1701	3795	18.9267	64.3826	100.194	1.76624	2.40429	-	NN-NN
let-805	III	2661214	2663285	41	128	370	1.43173	4.84478	9.76855	1.75867	2.77039	+	gt-ag
fbxa-78,fbxa-91,fbxa-92	III	1254283	1262772	20	62	159	0.698404	2.34669	4.19784	1.74849	2.58751	-	NN-NN
K08D10.14,K08D10.9	IV	4156563	4160887	51	158	33	1.78093	5.98027	0.871249	1.74758	-1.03147	+	gt-ag
C09E7.7,C09E7.8,F27B3.7	III	6547818	6560386	29	89	164	1.01269	3.36864	4.32984	1.73398	2.09613	-	NN-NN
pgp-5,pgp-7,pgp-8	X	10854743	10865377	152	460	469	5.30787	17.4109	12.3823	1.71379	1.22207	-	NN-NN
pgp-5,pgp-6,pgp-7,pgp-8	X	10854743	10871754	152	460	469	5.30787	17.4109	12.3823	1.71379	1.22207	-	NN-NN
sre-43	II	13966729	13968474	12	36	11	0.419042	1.36259	0.290416	1.70119	-0.528973	-	NN-NN
tra-1	III	11176200	11179084	25	75	75	0.873005	2.83874	1.98011	1.70119	1.18152	-	NN-NN
col-159,col-160	V	13199051	13201884	3083	9099	17474	107.659	344.396	461.34	1.6776	2.09936	-	NN-NN
B0564.6,B0564.9	IV	13131355	13136997	61	179	160	2.13013	6.77512	4.22424	1.6693	0.987749	+	gt-ag
clec-67,clec-69	IV	3924031	3931310	15	44	82	0.523803	1.66539	2.16492	1.66877	2.04722	+	gt-ag
clec-67,clec-70,clec-71	IV	3924031	3939576	15	44	47	0.523803	1.66539	1.24087	1.66877	1.24426	+	gt-ag
irld-7,nspb-2,nspb-4	IV	6591913	6598478	30	88	230	1.04761	3.33079	6.07234	1.66877	2.53516	+	gt-ag
C04E12.4,C04E12.5	V	3360066	3367490	21	61	165	0.733324	2.30884	4.35625	1.65465	2.57056	+	gt-ag
nlp-29,nlp-30	V	3982472	3984607	48	139	132	1.67617	5.26113	3.485	1.6502	1.05599	+	gt-ag
C04E12.2,C04E12.4,C04E12.5,C17B7.12,C17B7.2,C17B7.3,C17B7.4,C17B7.5,F35F10.1,T20D4.13,srbc-4,str-63	V	3317013	3392812	32	92	55	1.11745	3.48219	1.45208	1.63979	0.377918	+	gt-ag
Y58A7A.3,Y58A7A.4	V	5078861	5083046	207	580	624	7.22848	21.9529	16.4745	1.60265	1.18847	-	NN-NN
crh-1	III	11689817	11691302	60	167	179	2.09521	6.32092	4.72587	1.59304	1.17348	+	gt-ag
pgp-6,pgp-7	X	10866275	10872696	126	348	651	4.39994	13.1717	17.1874	1.58189	1.96579	-	NN-NN
T04A11.1,T04A11.2,T04A11.4	IV	12476551	12484490	271	737	1472	9.46337	27.8953	38.863	1.5596	2.03797	-	NN-NN
cdr-4,cdr-6,cdr-7,hrg-2	V	12408239	12413408	706	1876	3144	24.6537	71.0063	83.0063	1.52615	1.75142	-	NN-NN
pqn-35	II	4625039	4625220	49	130	333	1.71109	4.92048	8.7917	1.52388	2.36123	+	gt-ag
col-10,col-144,col-145	V	9160468	9165180	3200	8445	12957	111.745	319.642	342.084	1.51625	1.61415	-	NN-NN
drh-1,drh-2	IV	6613209	6618409	18	47	106	0.628563	1.77894	2.79856	1.50089	2.15455	-	NN-NN
C06C3.4,C06C3.9	II	9374300	9377749	58	150	28	2.02537	5.67748	0.739242	1.48706	-1.45407	+	gt-ag
sek-4,sek-5	X	5375815	5378576	50	129	141	1.74601	4.88263	3.72261	1.4836	1.09225	+	gt-ag
F40E3.3,Y23H5A.8,cars-2,mage-1	I	2630077	2642923	28	72	67	0.977765	2.72519	1.7689	1.4788	0.855292	+	gt-ag
Y58A7A.3,Y58A7A.4	V	5079347	5083531	326	824	572	11.384	31.1883	15.1017	1.454	0.407701	-	NN-NN
Y48G1BL.5,Y48G1BM.6,Y48G1BM.7,Y48G1BM.8,Y48G1BR.1	I	219828	254976	39	98	31	1.36189	3.70928	0.818446	1.44553	-0.734648	-	NN-NN
T23E7.2	X	17675249	17675764	83	207	64	2.89838	7.83492	1.6897	1.43467	-0.778481	+	gt-ag
ZK637.12,ZK637.15	III	8920950	8925098	77	189	55	2.68885	7.15362	1.45208	1.41168	-0.888869	+	gt-ag
D2096.11,D2096.16,M116.5,sdz-25	IV	8389381	8415735	220	536	320	7.68244	20.2875	8.44848	1.40096	0.137127	-	NN-NN
Y54G11A.4,Y54G11A.7	II	14293464	14298261	58	141	152	2.02537	5.33683	4.01303	1.3978	0.986505	+	gt-ag
C28A5.1,C28A5.2	III	4431451	4436703	114	274	184	3.9809	10.3709	4.85787	1.38137	0.28723	-	NN-NN
F56D5.6	IV	9402310	9406552	13	31	111	0.453962	1.17335	2.93057	1.36998	2.69053	+	gt-ag
col-10,col-145	V	9162824	9165180	39	93	139	1.36189	3.52004	3.66981	1.36998	1.4301	-	NN-NN
fbf-1,fbf-2	II	6080350	6091049	194	461	315	6.77452	17.4488	8.31647	1.36494	0.295853	-	NN-NN
F53F1.4,cut-2	V	13411198	13415378	674	1600	3494	23.5362	60.5597	92.2468	1.36348	1.97062	+	gt-ag
nspc-16,nspc-19	X	14523608	14528769	822	1939	4800	28.7044	73.3908	126.727	1.35433	2.14238	+	gt-ag
T28A8.3,T28A8.4	III	13505324	13508352	47	109	111	1.64125	4.12563	2.93057	1.32982	0.836385	+	gt-ag
T12B5.9,fbxa-59,fbxa-60	III	941094	945131	22	51	31	0.768244	1.93034	0.818446	1.32922	0.0913228	-	NN-NN
Y39A3CL.1	III	1841910	1844373	32	74	125	1.11745	2.80089	3.30019	1.32568	1.56234	+	gt-ag
C30B5.2	II	6197719	6198027	34	78	85	1.18729	2.95229	2.24413	1.31417	0.918486	+	gt-ag
T04A11.2,T04A11.4,T04A11.5	IV	12477480	12485064	93	213	330	3.24758	8.06202	8.71249	1.31178	1.42372	-	NN-NN
F45D11.1,K02E7.6,K02E7.7,math-34,str-148	II	1021881	1057606	16	36	111	0.558723	1.36259	2.93057	1.28615	2.39097	+	gt-ag
Y48A6C.1,Y48A6C.2	III	11106397	11113596	36	81	33	1.25713	3.06584	0.871249	1.28615	-0.528973	-	NN-NN
vhp-1	II	5323284	5331486	76	171	301	2.65393	6.47232	7.94685	1.28615	1.58225	+	gt-ag
mlp-1	III	5971780	5972897	109	241	187	3.8063	9.12181	4.93708	1.26093	0.375268	-	NN-NN
AC8.10,AC8.11,AC8.3,AC8.9	X	228927	238386	76	167	161	2.65393	6.32092	4.25064	1.252	0.679548	-	NN-NN
C04E12.4,C04E12.5,C17B7.12,C17B7.2,C17B7.3,C17B7.4,C17B7.5,F35F10.1,str-63	V	3317188	3363699	12	26	91	0.419042	0.984096	2.40254	1.2317	2.51939	+	gt-ag
F19C7.2,F19C7.4	IV	4601789	4604967	24	52	22	0.838084	1.96819	0.580833	1.2317	-0.528973	+	gt-ag
math-26,math-27	II	1770610	1774543	191	413	215	6.66976	15.632	5.67632	1.2288	-0.232678	+	gt-ag
B0034.2,B0034.4,B0034.5,C18A3.10,C18A3.7,C25H3.10,C25H3.11,C25H3.18,C25H3.8,C25H3.9,F10C1.3,F10C1.9,F55C12.4,F55C12.5,F55C12.6,H41C03.2,K05F1.10,K05F1.8,K05F1.9,R12C12.10,R12C12.4,R12C12.5,R12C12.6,R12C12.7,R12C12.8,R12C12.9,ZK1248.11,ZK1248.13,ZK1248.15,	II	5676231	6060089	41	88	73	1.43173	3.33079	1.92731	1.21811	0.428831	-	NN-NN
AC8.10,AC8.11,AC8.3,AC8.9	X	229096	238557	134	286	152	4.67931	10.8251	4.01303	1.21001	-0.221604	-	NN-NN
B0564.6,B0564.9	IV	13131020	13136770	66	140	245	2.30473	5.29898	6.46837	1.20111	1.4888	+	gt-ag
ncx-2	V	5307886	5308802	110	231	201	3.84122	8.74331	5.3067	1.18662	0.46625	+	gt-ag
F13H8.5	II	6254246	6254664	142	296	609	4.95867	11.2036	16.0785	1.17593	1.69711	-	NN-NN
C01B4.2,C01B4.6,C01B4.7,C01B4.8,C13B7.6,F56A4.2,F56A4.3,F56A4.4,F56A4.5,Y45G12C.16,nas-2,srbc-81,srd-61,srd-62,srd-73,srt-1,str-120,str-257,str-258	V	2422312	2530645	83	173	184	2.89838	6.54802	4.85787	1.17581	0.745081	+	gt-ag
C17F3.1,C17F3.3,D2092.6,D2092.8,E02D9.1,F08B6.1,F48A9.1,F48A9.2,F57B10.4,F57B10.5,T10E9.1,T10E9.2,T10E9.3,T10E9.4,T23B3.1,T23B3.2,T23B3.8,T23B3.9,W02D3.12,ZC581.2,ZC581.3,acdh-5,ahcy-1,cye-1,cytb-5.2,dhod-1,dpf-3,dpy-14,glh-1,glh-2,gpc-2,ipgm-1,let-607,me	I	6516825	6856959	181	377	401	6.32055	14.2694	10.587	1.1748	0.744171	+	gt-ag
pgp-6,pgp-7	X	10865580	10872008	363	754	579	12.676	28.5388	15.2865	1.17082	0.270152	-	NN-NN
C49G7.3,phat-3	V	4044365	4046901	27	56	244	0.942845	2.11959	6.44196	1.16869	2.77241	+	gt-ag
F42H11.1,K07A1.5,dut-1	I	9577529	9591691	61	126	18	2.13013	4.76908	0.475227	1.16277	-2.16425	+	gt-ag
R05D3.5	III	8349260	8349563	50	103	70	1.74601	3.89853	1.8481	1.15887	0.081985	+	gt-ag
fbf-1,fbf-2	II	6079832	6090520	176	359	377	6.14595	13.5881	9.95336	1.14463	0.695547	-	NN-NN
F10C1.8,ifb-2	II	5753763	5756366	334	680	1154	11.6633	25.7379	30.4673	1.14191	1.38528	+	gt-ag
pgp-6,pgp-7	X	10869885	10875953	128	260	217	4.46978	9.84096	5.72912	1.13859	0.358109	-	NN-NN
F36H5.14,math-26,math-3	II	1772893	1776627	61	123	107	2.13013	4.65553	2.82496	1.128	0.407288	+	gt-ag
C39B10.7,elt-2,elt-4	X	10475640	10482339	117	235	364	4.08566	8.89471	9.61014	1.12238	1.23399	+	gt-ag
Y48G8AL.12,Y48G8AL.16	I	1215123	1218885	11	22	80	0.384122	0.832697	2.11212	1.11623	2.45905	-	NN-NN
fbf-1,fbf-2	II	6080632	6091331	14	28	11	0.488883	1.0598	0.290416	1.11623	-0.751365	-	NN-NN
ubh-2,ubh-3	V	6507207	6509345	22	44	73	0.768244	1.66539	1.92731	1.11623	1.32695	-	NN-NN
F36H5.14,math-26,math-3	II	1773761	1777508	126	251	519	4.39994	9.50031	13.7024	1.11049	1.63887	+	gt-ag
F07B7.12,rpm-1	V	8817676	8859822	122	242	116	4.26026	9.15966	3.06257	1.10435	-0.476198	-	NN-NN
AC8.10,AC8.11,AC8.3,AC8.9	X	228358	237830	47	93	82	1.64125	3.52004	2.16492	1.1008	0.399521	-	NN-NN
F07B7.2,F07B7.7,W09B7.1,W09B7.2	V	8829279	8871429	405	801	416	14.1427	30.3177	10.983	1.10011	-0.36478	+	gt-ag
mel-11	II	9365076	9367469	21	41	18	0.733324	1.55184	0.475227	1.08146	-0.625834	+	gt-ag
C04E12.2,C04E12.4,C04E12.5,F35F10.4,srbc-3	V	3294523	3369338	66	126	181	2.30473	4.76908	4.77867	1.04911	1.05201	+	gt-ag
AC8.1,AC8.9	X	232953	242416	101	192	79	3.52694	7.26717	2.08572	1.04298	-0.757873	-	NN-NN
C49A9.5,C49A9.9	IV	6215661	6218754	150	279	312	5.23803	10.5601	8.23727	1.01153	0.653142	+	gt-ag
C33E10.1,C33E10.3,fbxa-120	X	17284406	17305543	77	143	23	2.68885	5.41253	0.607234	1.00931	-2.14667	+	gt-ag
ugt-19,ugt-20	IV	6077245	6081491	201	373	449	7.01896	14.118	11.8543	1.00821	0.756078	-	NN-NN
C09F9.7,glna-1	II	14713521	14721397	266	490	601	9.28877	18.5464	15.8673	0.997581	0.772497	-	NN-NN
par-1	V	14113814	14114476	63	116	192	2.19997	4.39058	5.06909	0.996927	1.20424	-	NN-NN
H24K24.2,H24K24.3,Y50D4C.2	V	912071	937260	352	646	713	12.2919	24.451	18.8243	0.992185	0.614885	+	gt-ag
C09F9.7,glna-1	II	14715385	14722708	72	132	355	2.51425	4.99618	9.37253	0.990695	1.89831	-	NN-NN
ubq-1	III	5942600	5943383	27	49	81	0.942845	1.85464	2.13852	0.976048	1.18152	+	gt-ag
C12D8.1,C12D8.15,daf-36,fipr-4,fipr-5,fipr-8,str-182,ttr-19	V	10221244	10239901	15	27	87	0.523803	1.02195	2.29693	0.964223	2.13261	-	NN-NN
C28D4.4,C28D4.7	IV	9742283	9744216	35	63	19	1.22221	2.38454	0.501628	0.964223	-1.2848	-	NN-NN
C28D4.5,C28D4.7	IV	9742283	9746040	35	63	19	1.22221	2.38454	0.501628	0.964223	-1.2848	-	NN-NN
C28D4.7,C28D4.8	IV	9742283	9747655	35	63	19	1.22221	2.38454	0.501628	0.964223	-1.2848	-	NN-NN
C28D4.5,C28D4.8	IV	9745997	9747655	35	63	19	1.22221	2.38454	0.501628	0.964223	-1.2848	-	NN-NN
nspb-4,nspb-5	IV	6598428	6599439	126	226	584	4.39994	8.55406	15.4185	0.959125	1.8091	+	gt-ag
F07B7.2,F07B7.7,W09B7.1,W09B7.2	V	8828884	8871206	267	475	226	9.32369	17.9787	5.96674	0.947314	-0.643959	+	gt-ag
C04E12.4,C04E12.5,C17B7.12,C17B7.2,C17B7.3,C17B7.4,C17B7.5,F35F10.1,str-63	V	3316703	3363253	21	37	47	0.733324	1.40044	1.24087	0.933362	0.75883	+	gt-ag
ckb-2,ckb-3	III	4368169	4371127	29	51	111	1.01269	1.93034	2.93057	0.93067	1.53299	+	gt-ag
D2096.11,D2096.16,M116.5,sdz-25	IV	8392283	8418210	44	77	71	1.53649	2.91444	1.87451	0.923581	0.286874	-	NN-NN
C49G7.3,D1065.2,T05B4.4,nhr-181,otpl-2,phat-3,phat-4,srh-169,srj-39,srj-40	V	4044051	4130087	603	1052	2038	21.0569	39.818	53.8062	0.919131	1.35348	+	gt-ag
C49G7.3,D1065.2,T05B4.4,nhr-181,phat-4	V	4046540	4130087	603	1052	2038	21.0569	39.818	53.8062	0.919131	1.35348	+	gt-ag
csp-2	IV	6312076	6314423	30	52	104	1.04761	1.96819	2.74576	0.909775	1.39011	+	gt-ag
clec-67,clec-69	IV	3924342	3931621	28	48	47	0.977765	1.81679	1.24087	0.893834	0.343792	+	gt-ag
F36H5.14,math-26,math-27,math-3	II	1769935	1777508	126	216	311	4.39994	8.17557	8.21086	0.893834	0.900049	+	gt-ag
Y57G11C.51,Y57G11C.57	IV	14773976	14781190	31	53	103	1.08253	2.00604	2.71935	0.88995	1.32886	-	NN-NN
sup-12	X	3905620	3906814	17	29	14	0.593643	1.09765	0.369621	0.886744	-0.68355	+	gt-ag
K08D9.4,Y73C8B.1	V	3196674	3200294	64	109	52	2.23489	4.12563	1.37288	0.88441	-0.703002	-	NN-NN
Y39E4B.10	III	13146418	13147298	47	80	60	1.64125	3.02799	1.58409	0.883565	-0.0511401	-	NN-NN
cyp-33C3,cyp-33C4,cyp-33C5	V	2237792	2246869	29	49	129	1.01269	1.85464	3.40579	0.872955	1.7498	+	gt-ag
C28A5.1,C28A5.2	III	4433945	4439192	25	42	130	0.873005	1.58969	3.43219	0.864687	1.97507	-	NN-NN
D2096.11,D2096.16,M116.5,sdz-25	IV	8392806	8418624	230	381	288	8.03164	14.4208	7.60363	0.844383	-0.0790069	-	NN-NN
pgp-6,pgp-7	X	10868437	10874743	165	272	177	5.76183	10.2952	4.67306	0.837367	-0.302159	-	NN-NN
C09E7.7,C09E7.8,F27B3.7	III	6549101	6561671	238	383	355	8.311	14.4965	9.37253	0.802609	0.173416	-	NN-NN
acox-2,acox-3	I	12945191	12950539	23	37	82	0.803164	1.40044	2.16492	0.802117	1.43055	+	gt-ag
T04A11.2,T04A11.4,T04A11.5	IV	12478794	12486448	39	62	136	1.36189	2.34669	3.5906	0.78502	1.39862	-	NN-NN
F40F12.3,ttr-3,ttr-4	III	9916534	9926027	17	27	72	0.593643	1.02195	1.90091	0.783651	1.67902	-	NN-NN
B0564.6,B0564.9	IV	13132488	13138613	71	112	244	2.47933	4.23918	6.44196	0.773834	1.37755	+	gt-ag
Y47G6A.21,Y47G6A.22	I	3558161	3561247	174	274	139	6.07611	10.3709	3.66981	0.771315	-0.727444	-	NN-NN
B0564.6,B0564.9	IV	13130623	13136459	157	247	273	5.48247	9.34891	7.20761	0.769972	0.394695	+	gt-ag
Y47G6A.32	I	3620777	3623609	42	66	84	1.46665	2.49809	2.21773	0.768303	0.596558	+	gt-ag
Y59A8B.25,Y59A8B.8	V	18054054	18063227	121	190	282	4.22534	7.19147	7.44522	0.767218	0.817246	-	NN-NN
C01B4.2,C01B4.6,C01B4.7,C01B4.8,C13B7.6,F56A4.2,F56A4.3,F56A4.4,F56A4.5,Y45G12C.16,nas-2,srbc-81,srd-61,srd-62,srd-73,srt-1,str-120,str-257,str-258	V	2422139	2530466	429	673	685	14.9808	25.4729	18.085	0.765855	0.271684	+	gt-ag
zip-2	III	834174	835328	222	345	429	7.75228	13.0582	11.3262	0.752263	0.546976	+	gt-ag
T19D12.1,T19D12.2	II	6662490	6671060	473	728	666	16.5172	27.5547	17.5834	0.738324	0.0902401	+	gt-ag
F20B10.2,nlr-1	IV	12175690	12183973	26	40	66	0.907925	1.51399	1.7425	0.737714	0.940513	-	NN-NN
F07B7.2,F07B7.7,W09B7.1,W09B7.2	V	8828227	8870834	456	701	249	15.9236	26.5327	6.57397	0.736607	-1.27633	+	gt-ag
fbxa-208,fbxa-77,srz-8	III	1251153	1260002	108	166	28	3.77138	6.28307	0.739242	0.736378	-2.35097	+	gt-ag
math-26,math-27	II	1769079	1772937	30	46	77	1.04761	1.74109	2.03291	0.732897	0.956454	+	gt-ag
K08E3.5	III	13766160	13766896	15	23	31	0.523803	0.870546	0.818446	0.732897	0.643864	-	NN-NN
fbxa-55,fbxa-59	III	933797	941136	30	46	38	1.04761	1.74109	1.00326	0.732897	-0.0624049	-	NN-NN
R10E8.7	V	18236302	18236907	62	95	127	2.16505	3.59573	3.35299	0.731885	0.631047	+	gt-ag
D2096.11,D2096.16,M116.5,sdz-25	IV	8390286	8416497	122	186	353	4.26026	7.04007	9.31973	0.724647	1.12935	-	NN-NN
pgp-6,pgp-7	X	10867778	10874079	299	449	548	10.4411	16.9946	14.468	0.702796	0.470589	-	NN-NN
F47D12.6	III	6286827	6287200	14	21	37	0.488883	0.794847	0.976855	0.701188	0.998657	-	NN-NN
ZK1307.3,ZK1307.4	II	9651177	9652571	69	103	134	2.40949	3.89853	3.5378	0.694202	0.554123	-	NN-NN
C28A5.1,C28A5.2	III	4429765	4434958	35	52	30	1.22221	1.96819	0.792045	0.687383	-0.625834	-	NN-NN
F40F12.7,F40F12.8,cbp-2	III	9914726	9923366	1293	1909	1093	45.1518	72.2553	28.8568	0.678321	-0.645871	+	gt-ag
acdh-10,acdh-7	X	17214164	17216479	114	168	420	3.9809	6.35877	11.0886	0.675653	1.47791	-	NN-NN
C26D10.7,eff-1	II	8335098	8347502	114	168	97	3.9809	6.35877	2.56094	0.675653	-0.636419	+	gt-ag
Y67D2.4	III	1534899	1536469	20	29	18	0.698404	1.09765	0.475227	0.652279	-0.555445	+	gt-ag
ulp-2	II	4957671	4958637	123	178	101	4.29518	6.73727	2.66655	0.649445	-0.687745	-	NN-NN
gta-1	IV	10182027	10182492	57	82	73	1.99045	3.10369	1.92731	0.640888	-0.0465073	+	gt-ag
cyp-33C3,cyp-33C4,cyp-33C5	V	2237573	2246649	55	79	197	1.92061	2.99014	5.20109	0.638647	1.43725	+	gt-ag
H43E16.1,T19D12.1	II	6673099	6679087	307	436	390	10.7205	16.5025	10.2966	0.622315	-0.0582064	+	gt-ag
unc-68	V	6910302	6911781	329	467	308	11.4887	17.6759	8.13166	0.621561	-0.498599	-	NN-NN
unc-68	V	6907117	6907608	48	68	19	1.67617	2.57379	0.501628	0.618726	-1.74048	-	NN-NN
Y59A8B.25,Y59A8B.8	V	18053870	18062307	367	519	573	12.8157	19.6441	15.1281	0.61618	0.239313	-	NN-NN
C09E7.7,C09E7.8,F27B3.7	III	6547678	6560248	171	240	458	5.97135	9.08396	12.0919	0.605264	1.01791	-	NN-NN
math-26,math-27	II	1768903	1772767	336	470	201	11.7332	17.7894	5.3067	0.600425	-1.14471	+	gt-ag
Y40B1A.2,Y40B1A.3	I	13347618	13353007	597	835	703	20.8474	31.6046	18.5602	0.600271	-0.167648	+	gt-ag
Y48G1BL.5,Y48G1BM.6,Y48G1BM.7,Y48G1BM.8,Y48G1BR.1	I	220107	255195	164	229	364	5.72691	8.66761	9.61014	0.597878	0.746801	-	NN-NN
F40F12.7,F40F12.8,cbp-2	III	9914905	9923624	1560	2175	1172	54.4755	82.3234	30.9425	0.595695	-0.816015	+	gt-ag
F10C1.8,ifb-2	II	5752721	5756007	807	1125	2063	28.1806	42.5811	54.4663	0.59551	0.950661	+	gt-ag
C04E12.4,C04E12.5	V	3360662	3367899	40	55	216	1.39681	2.08174	5.70272	0.575658	2.02952	+	gt-ag
frm-1	I	14880131	14881052	43	59	58	1.50157	2.23314	1.53129	0.572604	0.0282744	-	NN-NN
drh-1,drh-2	IV	6611691	6616850	231	316	345	8.06656	11.9605	9.10851	0.568258	0.175262	-	NN-NN
M116.5	IV	8417303	8418210	81	109	184	2.82854	4.12563	4.85787	0.54456	0.78027	-	NN-NN
F07B7.12,rpm-1	V	8813832	8855977	168	225	183	5.86659	8.51621	4.83147	0.53769	-0.280059	-	NN-NN
F40F12.7,F40F12.8,cbp-2	III	9915324	9924317	564	744	1126	19.695	28.1603	29.7281	0.515833	0.593998	+	gt-ag
nspc-3,nspc-5,nspc-7	X	8537110	8541936	179	234	259	6.25071	8.85686	6.83799	0.502775	0.129551	+	gt-ag
F36H5.14,math-26,math-3	II	1773281	1777014	33	43	99	1.15237	1.62754	2.61375	0.498097	1.18152	+	gt-ag
Y48G8AL.13	I	1224778	1226620	37	48	18	1.29205	1.81679	0.475227	0.491735	-1.44297	-	NN-NN
C09F9.7,glna-1	II	14716400	14723600	142	184	187	4.95867	6.96437	4.93708	0.490041	-0.00629451	-	NN-NN
T19D12.1,T19D12.2	II	6662899	6671401	489	633	884	17.076	23.9589	23.3389	0.488597	0.45077	+	gt-ag
K04H4.2	III	9348259	9348677	17	22	36	0.593643	0.832697	0.950454	0.488195	0.67902	-	NN-NN
H24G06.1	V	9459475	9460052	99	128	309	3.4571	4.84478	8.15806	0.486869	1.23866	+	gt-ag
ced-7	III	9576846	9576941	96	124	146	3.35234	4.69338	3.85462	0.48546	0.20142	-	NN-NN
rpa-4	I	5510333	5511259	263	339	262	9.18401	12.8311	6.91719	0.482448	-0.408938	-	NN-NN
C55B7.10,C55B7.11,T10E9.5,T10E9.6,T10E9.8,acdh-3,acdh-4,cdc-25.1,che-1,dbr-1,mdt-18,nmtn-1,nuo-2	I	6464618	6546994	178	229	314	6.21579	8.66761	8.29007	0.479696	0.415445	-	NN-NN
C09E7.6,C09E7.7,C09E7.8	III	6542594	6554702	91	117	153	3.17774	4.42843	4.03943	0.478796	0.346151	-	NN-NN
F40F12.7,F40F12.9,K11H3.2,K11H3.3,K11H3.4,K11H3.5,K11H3.8,R10E11.6,ZK632.11,ZK632.12,ZK632.14,ZK632.2,ZK632.5,ZK757.10,arl-5,cbp-1,mam-7,mcm-6,panl-3,twk-48,usp-46,vha-2	III	9768368	9914779	1584	2028	1315	55.3136	76.7595	34.718	0.472711	-0.671951	+	gt-ag
K01A2.9,mps-2	II	310273	316662	72	92	81	2.51425	3.48219	2.13852	0.469863	-0.233517	-	NN-NN
K01A2.12,K01A2.9,mps-2	II	310273	318420	72	92	81	2.51425	3.48219	2.13852	0.469863	-0.233517	-	NN-NN
par-1	V	14115582	14117503	451	576	711	15.749	21.8015	18.7715	0.469167	0.25328	-	NN-NN
fbxc-1,fbxc-2	IV	892456	896652	1399	1779	1494	48.8533	67.3349	39.4438	0.462897	-0.308658	+	gt-ag
Y19D10B.6,irld-16	V	2317811	2320585	109	138	163	3.8063	5.22328	4.30344	0.456566	0.177102	-	NN-NN
C28A5.1,C28A5.2	III	4433370	4438617	125	158	169	4.36502	5.98027	4.46185	0.454222	0.0316533	-	NN-NN
fbf-1,fbf-2	II	6078748	6089433	108	136	135	3.77138	5.14758	3.5642	0.448801	-0.0815138	-	NN-NN
C07E3.10,C07E3.4,C07E3.8,C07E3.9,F33H1.3,F33H1.4,F54B3.1,M02G9.1,M02G9.2,M02G9.3,M02G9.4,R05H5.3,R05H5.7,T01E8.1,T01E8.8,T09F3.2,ZK970.7,anr-52,atad-3,gpd-1,gpd-4,mdt-22,plc-3,ref-1,srb-6,ztf-27	II	10172287	10395193	1579	1979	1214	55.139	74.9048	32.0514	0.441986	-0.782685	+	gt-ag
C04E12.2,C04E12.4,C04E12.5,C17B7.12,C17B7.2,C17B7.3,C17B7.4,C17B7.5,F35F10.1,T20D4.13,srbc-4,str-63	V	3316703	3392536	478	594	649	16.6918	22.4828	17.1346	0.429678	0.037766	+	gt-ag
Y75B8A.6	III	12127201	12130146	172	213	188	6.00627	8.06202	4.96348	0.424671	-0.275118	-	NN-NN
B0238.1,B0238.13	V	5242184	5245152	21	26	155	0.733324	0.984096	4.09223	0.424348	2.48037	-	NN-NN
T23E1.2,Y67D8C.3	IV	3057598	3141849	128	158	116	4.46978	5.98027	3.06257	0.420007	-0.545461	+	gt-ag
W03H9.2,cacn-1	II	14142039	14143788	231	283	176	8.06656	10.7115	4.64666	0.409135	-0.795759	-	NN-NN
K08D10.14,K08D10.9	IV	4155302	4160393	40	49	75	1.39681	1.85464	1.98011	0.409008	0.503449	+	gt-ag
math-39,math-40,math-41	II	1829371	1832878	40	49	14	1.39681	1.85464	0.369621	0.409008	-1.91802	+	gt-ag
ebp-1,ebp-3	V	18047684	18057881	822	1005	587	28.7044	38.0391	15.4977	0.406211	-0.88922	+	gt-ag
cyp-34A7,cyp-34A8	V	3962739	3967004	112	136	94	3.91106	5.14758	2.48174	0.396334	-0.656208	-	NN-NN
ttn-1	V	6154800	6161647	66	80	199	2.30473	3.02799	5.2539	0.39376	1.18879	-	NN-NN
F10E7.11,T07F8.4	II	7120866	7130916	444	538	478	15.5046	20.3632	12.6199	0.393272	-0.296991	-	NN-NN
F49E2.5	X	9555673	9555799	71	86	124	2.47933	3.25509	3.27378	0.392744	0.401007	+	gt-ag
bed-2	III	11466093	11468692	106	128	123	3.70154	4.84478	3.24738	0.388306	-0.188848	-	NN-NN
K07A1.9	I	9614015	9614340	92	111	47	3.21266	4.20133	1.24087	0.38708	-1.37241	-	NN-NN
clec-54,clec-55	V	14478741	14482072	34	41	21	1.18729	1.55184	0.554431	0.386315	-1.09859	+	gt-ag
fbxa-115,fbxa-116	V	20188609	20191520	429	515	297	14.9808	19.4927	7.84124	0.379821	-0.933957	-	NN-NN
C28D4.4,C28D4.5	IV	9744173	9746040	35	42	19	1.22221	1.58969	0.501628	0.37926	-1.2848	-	NN-NN
C28D4.4,C28D4.5,C28D4.8	IV	9744173	9747655	35	42	19	1.22221	1.58969	0.501628	0.37926	-1.2848	-	NN-NN
rpa-4	I	5509764	5510693	258	308	391	9.00941	11.6578	10.323	0.371785	0.196356	-	NN-NN
H06I04.6	III	3062885	3063961	160	191	198	5.58723	7.22932	5.2275	0.371727	-0.0960133	-	NN-NN
C01B4.6,C01B4.7,C01B4.8,C13B7.6,F56A4.2,F56A4.3,F56A4.4,F56A4.5,Y19D10A.1,Y19D10A.16,Y19D10A.17,Y19D10A.18,Y19D10A.2,nas-2,srd-60,srd-76,srt-1,str-120	V	2392916	2501292	408	486	266	14.2474	18.395	7.0228	0.368613	-1.02058	+	gt-ag
D2096.11,D2096.16,M116.5,sdz-25	IV	8391517	8417430	237	282	279	8.27608	10.6737	7.36602	0.367034	-0.168064	-	NN-NN
igdb-1,igdb-2	IV	12473510	12481281	280	333	435	9.77765	12.604	11.4846	0.366321	0.232147	+	gt-ag
T16G1.3,T16G1.4	V	12941588	12944270	78	92	117	2.72377	3.48219	3.08897	0.354386	0.181521	-	NN-NN
ZC247.2	I	10257562	10258055	176	207	138	6.14595	7.83492	3.64341	0.350281	-0.754349	-	NN-NN
C17G10.9,F59E12.15,F59E12.16,F59E12.6	II	5621791	5630871	491	577	964	17.1458	21.8394	25.451	0.349074	0.569868	-	NN-NN
C26D10.7,eff-1	II	8334802	8347214	242	284	200	8.45069	10.7494	5.2803	0.34711	-0.678449	+	gt-ag
C09F9.7,glna-1	II	14716739	14724840	41	48	85	1.43173	1.81679	2.24413	0.343636	0.648397	-	NN-NN
C27C7.1,nhr-244,nhr-259,nhr-74	I	11431584	11455019	36	42	41	1.25713	1.58969	1.08246	0.338618	-0.215815	+	gt-ag
gst-26,gst-27	II	15164355	15165531	597	694	242	20.8474	26.2678	6.38916	0.333431	-1.70617	-	NN-NN
C04E12.6,C17B7.10,C17B7.14,C17B7.8,C17B7.9,F35F10.10,F35F10.13,F35F10.14,F35F10.6,arrd-18,arrd-19,fbxa-65,srbc-1,srx-122	V	3288149	3354790	88	102	80	3.07298	3.86068	2.11212	0.32922	-0.540945	-	NN-NN
C16C8.12,C16C8.13	II	3452204	3453434	19	22	34	0.663484	0.832697	0.897651	0.32773	0.436093	+	gt-ag
Y17D7C.4	V	18713956	18714291	19	22	13	0.663484	0.832697	0.343219	0.32773	-0.95093	+	gt-ag
M116.5	IV	8416616	8418210	39	45	143	1.36189	1.70324	3.77541	0.322677	1.47103	-	NN-NN
C01B4.2,C01B4.6,C01B4.7,C01B4.8,C13B7.6,F56A4.2,F56A4.3,F56A4.4,F56A4.5,Y45G12C.16,nas-2,srbc-81,srd-61,srd-62,srd-73,srt-1,str-120,str-257,str-258	V	2422013	2530345	226	259	193	7.89196	9.80311	5.09549	0.312855	-0.631164	+	gt-ag
igdb-1,igdb-2	IV	12474684	12482266	620	709	1009	21.6505	26.8355	26.6391	0.309743	0.299144	+	gt-ag
F07B7.12,rpm-1	V	8819035	8861571	148	169	312	5.16819	6.39662	8.23727	0.307652	0.672507	-	NN-NN
nspc-1,nspc-4,nspc-6	X	8535029	8541494	205	234	259	7.15864	8.85686	6.83799	0.307111	-0.0661137	-	NN-NN
nspc-2,nspc-3,nspc-5,nspc-7	X	8535471	8541936	205	234	259	7.15864	8.85686	6.83799	0.307111	-0.0661137	+	gt-ag
nspc-5,nspc-7	X	8538742	8541936	205	234	259	7.15864	8.85686	6.83799	0.307111	-0.0661137	+	gt-ag
rpa-4	I	5510060	5510981	1020	1164	1252	35.6186	44.0572	33.0547	0.306748	-0.107776	-	NN-NN
syg-2	X	14657918	14658346	29	33	38	1.01269	1.24904	1.00326	0.302639	-0.0134953	+	gt-ag
H43E16.1,T19D12.1	II	6672675	6678647	321	362	599	11.2094	13.7016	15.8145	0.289642	0.496541	+	gt-ag
T19D12.1,T19D12.2	II	6663099	6671598	1029	1158	1599	35.9329	43.8301	42.216	0.286618	0.232485	+	gt-ag
anc-1	I	4351364	4357317	2838	3189	3467	99.1035	120.703	91.534	0.284455	-0.114629	+	gt-ag
anc-1	I	4345590	4357317	2790	3135	3296	97.4273	118.659	87.0193	0.284426	-0.162991	+	gt-ag
cdr-4,cdr-6,cdr-7,hrg-2	V	12408415	12413594	41	46	135	1.43173	1.74109	3.5642	0.282236	1.31582	-	NN-NN
ppm-2	III	4652770	4653108	182	204	232	6.35547	7.72137	6.12515	0.280857	-0.0532555	+	gt-ag
anc-1	I	4348477	4354430	2857	3192	3443	99.767	120.817	90.9003	0.276186	-0.134277	+	gt-ag
gpd-2,gpd-3	X	3113032	3114448	5358	5972	6880	187.102	226.039	181.642	0.272746	-0.0427279	-	NN-NN
anc-1	I	4348477	4357317	2841	3164	3415	99.2083	119.757	90.1611	0.271577	-0.137955	+	gt-ag
ZC262.10,ZC262.12,ZC262.7,unc-116	III	8344151	8352397	950	1056	1446	33.1742	39.9694	38.1766	0.268836	0.202626	-	NN-NN
D2096.11,D2096.16,M116.5,sdz-25	IV	8391517	8418210	81	90	171	2.82854	3.40649	4.51466	0.268229	0.674561	-	NN-NN
C01B4.7,C01B4.8,C13B7.6,F56A4.2,F56A4.3,F56A4.4,F56A4.5,Y19D10A.1,Y19D10A.16,Y19D10A.17,Y19D10A.18,Y19D10A.2,Y19D10A.4,nas-2,srd-60,srd-75,srd-76,srt-1,str-120	V	2387599	2496641	45	50	81	1.57141	1.89249	2.13852	0.268229	0.444555	+	gt-ag
anc-1	I	4342550	4357317	2820	3120	3363	98.4749	118.092	88.7882	0.262077	-0.149388	+	gt-ag
anc-1	I	4342550	4354430	2851	3149	3346	99.5575	119.189	88.3394	0.259652	-0.172472	+	gt-ag
M116.5	IV	8416616	8417430	39	43	143	1.36189	1.62754	3.77541	0.257089	1.47103	-	NN-NN
sma-1	V	11914580	11915717	88	97	205	3.07298	3.67143	5.41231	0.256707	0.816607	+	gt-ag
anc-1	I	4345590	4354430	2846	3135	3314	99.3829	118.659	87.4945	0.255756	-0.183804	+	gt-ag
anc-1	I	4354251	4357317	2869	3157	3462	100.186	119.492	91.402	0.254232	-0.132384	+	gt-ag
anc-1	I	4351364	4354430	2924	3213	3425	102.107	121.612	90.4251	0.252204	-0.175281	+	gt-ag
C49G7.3,phat-3	V	4044051	4046592	1400	1537	2647	48.8883	58.1752	69.8847	0.250916	0.51549	+	gt-ag
Y69A2AR.16	IV	2497858	2499194	31	34	75	1.08253	1.28689	1.98011	0.249493	0.871181	+	gt-ag
C13B7.6,F56A4.2,F56A4.3,F56A4.4,F56A4.5,Y19D10A.1,Y19D10A.16,Y19D10A.17,Y19D10A.18,Y19D10A.2,Y19D10A.4,Y19D10A.5,Y19D10A.6,clec-209,srd-60,srd-75,srd-76,srt-1,str-120	V	2352434	2460442	2082	2271	1627	72.7038	85.957	42.9552	0.241584	-0.759198	+	gt-ag
C01B4.2,C01B4.6,C01B4.7,C01B4.8,C13B7.6,F56A4.2,F56A4.3,F56A4.4,F56A4.5,Y45G12C.16,nas-2,srbc-81,srd-61,srd-62,srd-73,srt-1,str-120,str-257,str-258	V	2422457	2531032	470	511	497	16.4125	19.3413	13.1215	0.236889	-0.322857	+	gt-ag
F57F4.4,gfi-1	V	6399746	6408658	4463	4835	5827	155.849	183.004	153.841	0.231728	-0.0187023	-	NN-NN
mctp-1	I	6632281	6632625	24	26	63	0.838084	0.984096	1.66329	0.231703	0.988876	-	NN-NN
klp-12	IV	11343036	11344365	13	14	50	0.453962	0.529898	1.32007	0.223141	1.53997	-	NN-NN
C28A5.1,C28A5.2	III	4433593	4438842	130	140	217	4.53962	5.29898	5.72912	0.223141	0.335742	-	NN-NN
fbxc-1,fbxc-10,fbxc-2,fbxc-4	IV	892456	900804	1289	1383	1241	45.0121	52.3463	32.7643	0.217775	-0.458191	+	gt-ag
hpo-3	I	5858124	5859276	28	30	36	0.977765	1.1355	0.950454	0.215762	-0.0408718	-	NN-NN
ebp-1,ebp-3	V	18049880	18060631	539	575	760	18.822	21.7637	20.0651	0.209503	0.0922723	+	gt-ag
F13B9.1	X	8288156	8288601	15	16	167	0.523803	0.605597	4.40905	0.209335	3.07337	+	gt-ag
C14B1.8,C46F11.5,C46F11.6,F34D10.6,acy-3,ben-1,dpy-27,sel-8,tbb-2,tir-1	III	3538501	4016315	64	68	58	2.23489	2.57379	1.53129	0.203689	-0.545461	-	NN-NN
gei-3	X	12811854	12812457	441	468	556	15.3998	17.7137	14.6792	0.201956	-0.0691356	-	NN-NN
fbxc-10,fbxc-2,fbxc-4	IV	896608	900804	1306	1374	1300	45.6058	52.0057	34.3219	0.189453	-0.410085	+	gt-ag
E02H9.3	III	2462045	2462474	703	737	551	24.5489	27.8953	14.5472	0.184366	-0.754914	+	gt-ag
AC8.1,AC8.9	X	233253	243000	115	120	102	4.01582	4.54198	2.69295	0.177627	-0.576507	-	NN-NN
C09F9.7,glna-1	II	14715822	14723222	190	198	217	6.63484	7.49427	5.72912	0.175727	-0.211746	-	NN-NN
F10E7.11,T07F8.4	II	7120969	7131030	132	137	137	4.60946	5.18543	3.617	0.169864	-0.349804	-	NN-NN
Y46C8AL.11,clec-67,clec-70,clec-71,clec-72	IV	3922411	3945124	240	249	326	8.38084	9.42461	8.60689	0.169337	0.0383957	+	gt-ag
ZK971.1	II	10279028	10279559	218	224	192	7.6126	8.47836	5.06909	0.155397	-0.586664	-	NN-NN
R155.5,moa-1	III	1969675	1970244	185	190	46	6.46023	7.19147	1.21447	0.1547	-2.41126	-	NN-NN
anc-1	I	4342550	4351543	5123	5243	8313	178.896	198.447	219.476	0.14963	0.294938	+	gt-ag
nlp-28,nlp-29,nlp-30	V	3982472	3988107	44	45	50	1.53649	1.70324	1.32007	0.148647	-0.219017	+	gt-ag
C09E7.7,C09E7.8,F27B3.7	III	6548074	6560644	795	811	644	27.7615	30.6962	17.0026	0.144973	-0.707336	-	NN-NN
anc-1	I	4348477	4351543	5160	5263	8436	180.188	199.204	222.723	0.14474	0.305746	+	gt-ag
npl-4.1,npl-4.2	II	5623711	5632221	1365	1388	2053	47.6661	52.5356	54.2023	0.140333	0.185391	+	gt-ag
ubq-1	III	5941357	5942649	1529	1554	1826	53.393	58.8187	48.2091	0.139624	-0.147343	+	gt-ag
H14N18.4	V	8925272	8925741	214	216	250	7.47292	8.17557	6.60037	0.129646	-0.179125	-	NN-NN
anc-1	I	4345590	4348656	7192	7234	13100	251.146	273.806	345.86	0.124627	0.46166	+	gt-ag
anc-1	I	4345590	4351543	5221	5247	8374	182.318	198.598	221.086	0.123393	0.278149	+	gt-ag
scd-1	X	12505311	12505819	13	13	76	0.453962	0.492048	2.00651	0.116226	2.14405	-	NN-NN
drh-1,drh-2	IV	6611422	6616591	405	405	292	14.1427	15.3292	7.70924	0.116226	-0.875395	-	NN-NN
E02H9.3	III	2462045	2462753	383	383	310	13.3744	14.4965	8.18446	0.116226	-0.708518	+	gt-ag
srp-5,srp-6	V	7382182	7384520	132	132	110	4.60946	4.99618	2.90416	0.116226	-0.666476	-	NN-NN
ZK637.12,ZK637.15	III	8920630	8924778	148	148	46	5.16819	5.60178	1.21447	0.116226	-2.08933	+	gt-ag
Y102A5C.35,Y102A5C.36,Y102A5C.43,fbxa-205,fbxa-207	V	16921076	16946150	20	20	48	0.698404	0.756997	1.26727	0.116226	0.859593	-	NN-NN
AC8.10,AC8.11,AC8.3,AC8.9	X	228202	237664	45	45	171	1.57141	1.70324	4.51466	0.116226	1.52256	-	NN-NN
fbxc-1,fbxc-10,fbxc-11,fbxc-5	IV	891330	903993	1243	1236	958	43.4058	46.7824	25.2926	0.108078	-0.779171	+	gt-ag
K11H3.2	III	9847098	9847433	144	143	68	5.02851	5.41253	1.7953	0.106172	-1.4859	+	gt-ag
F57B9.3,byn-1,coq-2,inf-1	III	6930199	6940141	6144	6063	8901	214.55	229.484	235	0.0970796	0.131347	+	gt-ag
linc-37,zip-2	III	833061	834088	138	136	114	4.81899	5.14758	3.00977	0.0951644	-0.679076	+	gt-ag
anc-1	I	4342550	4348656	7228	7088	13209	252.403	268.28	348.737	0.0880081	0.466411	+	gt-ag
Y57A10A.3,Y57A10A.4	II	12151637	12154198	73	71	140	2.54917	2.68734	3.69621	0.0761485	0.536017	+	gt-ag
B0034.2,B0034.4,B0034.5,C18A3.10,C18A3.7,C25H3.10,C25H3.11,C25H3.18,C25H3.8,C25H3.9,F10C1.3,F10C1.9,F55C12.4,F55C12.5,F55C12.6,H41C03.2,K05F1.10,K05F1.8,K05F1.9,R12C12.10,R12C12.4,R12C12.5,R12C12.6,R12C12.7,R12C12.8,R12C12.9,ZK1248.11,ZK1248.13,ZK1248.15,	II	5675131	6059030	253	246	357	8.83481	9.31106	9.42533	0.0757469	0.0933448	-	NN-NN
rpa-4	I	5510197	5511121	168	163	143	5.86659	6.16952	3.77541	0.0726367	-0.635888	-	NN-NN
fbxc-1,fbxc-10,fbxc-11,fbxc-12,fbxc-3,fbxc-5	IV	891330	908145	1244	1206	949	43.4407	45.6469	25.055	0.0714694	-0.793948	+	gt-ag
glna-1	II	14720591	14721349	398	385	528	13.8982	14.5722	13.94	0.068316	0.00432765	-	NN-NN
math-26,math-27	II	1769935	1773828	290	279	250	10.1269	10.5601	6.60037	0.0604382	-0.617567	+	gt-ag
F10C1.8,ifb-2	II	5752867	5756007	2095	2015	2277	73.1578	76.2674	60.1162	0.0600556	-0.283258	+	gt-ag
C26H9A.3,T23B5.6	IV	12639245	12677087	102	98	57	3.56186	3.70928	1.50489	0.0585105	-1.24298	-	NN-NN
gop-1	III	5256758	5257005	24	23	34	0.838084	0.870546	0.897651	0.0548254	0.0990585	+	gt-ag
AC8.12,AC8.7	X	231222	240689	94	90	90	3.2825	3.40649	2.37613	0.0534902	-0.466178	+	gt-ag
F18F11.1,K02D7.1,T21D12.14,T21D12.7,col-101,dsc-4,fln-1,grl-26,pat-6,pqbp-1.1,pqbp-1.2,snai-1,spl-1,srh-282	IV	261239	384689	164	157	122	5.72691	5.94243	3.22098	0.0532947	-0.830257	-	NN-NN
T23E1.2,Y67D8C.3	IV	3057811	3142847	46	44	128	1.60633	1.66539	3.37939	0.0520956	1.073	+	gt-ag
Y55B1AR.2	III	592143	593927	135	129	107	4.71423	4.88263	2.82496	0.0506376	-0.73879	-	NN-NN
F10C1.8,ifb-2	II	5753602	5756208	6889	6558	12293	240.565	248.219	324.554	0.0451873	0.432029	+	gt-ag
gpd-2,gpd-3	X	3112856	3114270	25041	23826	30571	874.436	901.81	807.12	0.0444706	-0.11557	-	NN-NN
C14H10.2	X	10244292	10245059	78	74	134	2.72377	2.80089	3.5378	0.0402771	0.377245	-	NN-NN
C18D4.12,C18D4.3,C18D4.4,C18D4.6,F20E11.17,F20E11.18,F20E11.5,F31E9.6,F31E9.t1,K03D7.3,K03D7.8,K03D7.9,T27C5.10,T27C5.6,Y20C6A.1,fbxa-102,fbxa-134,fbxa-180,fbxa-188,lsy-27,sdz-16,srh-110,srh-111,srh-118,srh-203,srh-235,srh-253,srsx-2,srw-45,srx-53,srz-48,	V	17313752	17537108	18	17	28	0.628563	0.643447	0.739242	0.0337638	0.233988	-	NN-NN
Y59A8B.25,Y59A8B.8	V	18054942	18063672	274	257	737	9.56813	9.72741	19.4579	0.0238184	1.02405	-	NN-NN
Y47D3A.1,Y48A6C.2,tra-1	III	11113691	11195043	417	390	816	14.5617	14.7614	21.5436	0.0196527	0.56508	-	NN-NN
math-35,math-42	II	2101218	2106485	28	26	46	0.977765	0.984096	1.21447	0.00931077	0.312765	+	gt-ag
anc-1	I	4342550	4345769	10214	9448	18707	356.675	357.605	493.893	0.00375888	0.469588	+	gt-ag
R151.2	III	7210201	7211442	407	376	565	14.2125	14.2315	14.9168	0.00192984	0.0697802	+	gt-ag
fbxc-11,fbxc-4,fbxc-5	IV	899634	903993	1358	1245	983	47.4216	47.1231	25.9527	-0.00911177	-0.869662	+	gt-ag
fkb-2,fkb-8	I	12917836	12918978	7914	7241	8939	276.358	274.071	236.003	-0.0119921	-0.227735	+	gt-ag
C53A3.2,K09H11.11,K09H11.7	V	5753370	5763601	70	64	66	2.44441	2.42239	1.7425	-0.013057	-0.488331	-	NN-NN
C17C3.13,C17C3.24,C17C3.9,C17G10.10,C17G10.6,C17G10.7,C17G10.9,F12A10.6,F12A10.7,F12A10.8,F59E12.15,T25E4.2,ZK177.8,ZK177.9,acdh-2,cdc-14,dhs-6,hlh-26,hlh-27,ins-13,tbx-35	II	5494300	5626578	115	105	222	4.01582	3.97423	5.86113	-0.0150186	0.545484	-	NN-NN
fbxc-10,fbxc-11,fbxc-12,fbxc-2,fbxc-3,fbxc-5	IV	895482	908145	1352	1234	973	47.2121	46.7067	25.6887	-0.0155268	-0.878025	+	gt-ag
pgp-6,pgp-7	X	10866971	10873274	541	493	744	18.8918	18.66	19.6427	-0.017815	0.0562322	-	NN-NN
E02H9.3	III	2462329	2462753	501	456	529	17.495	17.2595	13.9664	-0.0195508	-0.324985	+	gt-ag
fbxc-12,fbxc-3,fbxc-5	IV	903787	908145	1362	1239	984	47.5613	46.896	25.9791	-0.0203245	-0.872438	+	gt-ag
npl-4.1,npl-4.2	II	5623457	5631982	1028	935	1060	35.898	35.3896	27.9856	-0.020576	-0.359218	+	gt-ag
fbxc-11,fbxc-12,fbxc-3,fbxc-4,fbxc-5	IV	899634	908145	1350	1223	961	47.1423	46.2904	25.3718	-0.026309	-0.893793	+	gt-ag
C09E7.7,C09E7.8,F27B3.7	III	6547183	6559755	258	233	332	9.00941	8.81901	8.7653	-0.0308151	-0.0396297	-	NN-NN
skr-1,skr-2	I	9469784	9471829	638	576	836	22.2791	21.8015	22.0716	-0.0312616	-0.0134953	+	gt-ag
C03B1.7	X	6343926	6344454	140	126	233	4.88883	4.76908	6.15155	-0.0357771	0.331461	+	gt-ag
C09F9.7,glna-1	II	14716739	14724846	20	18	35	0.698404	0.681297	0.924052	-0.0357771	0.403913	-	NN-NN
C06C3.4,C06C3.9	II	9374184	9377617	88	79	148	3.07298	2.99014	3.90742	-0.0394249	0.34658	+	gt-ag
C45B2.2,C45B2.3	X	6083091	6084913	977	877	663	34.117	33.1943	17.5042	-0.0395557	-0.962792	+	gt-ag
unc-68	V	6905839	6906343	534	477	845	18.6474	18.0544	22.3093	-0.0466245	0.25867	-	NN-NN
fbxc-10,fbxc-11,fbxc-2,fbxc-5	IV	895482	903993	1364	1213	973	47.6311	45.9119	25.6887	-0.0530381	-0.890774	+	gt-ag
ifa-3,mua-6	X	16262705	16268095	421	370	392	14.7014	14.0044	10.3494	-0.070069	-0.506408	-	NN-NN
T23E1.2,Y67D8C.3	IV	3059825	3144059	122	107	293	4.26026	4.04993	7.73564	-0.0730444	0.860578	+	gt-ag
Y73B6BL.289,blos-2,ipla-6	IV	6334689	6347680	64	56	75	2.23489	2.11959	1.98011	-0.0764191	-0.174623	+	gt-ag
clec-5,clec-6	III	4882916	4886701	376	329	131	13.13	12.4526	3.4586	-0.0764191	-1.92461	-	NN-NN
F56A4.11,F56A4.12,F56A4.6,irld-35,mct-1,mct-2,srd-71	V	2378952	2487662	546	477	544	19.0664	18.0544	14.3624	-0.0786857	-0.408736	-	NN-NN
zyg-12	II	4952392	4953161	47	41	56	1.64125	1.55184	1.47848	-0.0808109	-0.150676	+	gt-ag
C13B7.6,F56A4.2,F56A4.3,F56A4.4,F56A4.5,Y19D10A.1,Y19D10A.16,Y19D10A.17,Y19D10A.18,Y19D10A.2,Y19D10A.4,Y19D10A.5,Y19D10A.6,clec-209,srd-60,srd-75,srd-76,srt-1,str-120	V	2351944	2460159	1536	1338	1491	53.6374	50.6431	39.3646	-0.0828741	-0.44634	+	gt-ag
mvk-1	III	6133104	6136115	469	408	762	16.3776	15.4427	20.1179	-0.0847928	0.296761	-	NN-NN
D2096.11,D2096.16,M116.5,sdz-25	IV	8391247	8417112	180	155	95	6.28563	5.86673	2.50814	-0.0995027	-1.32544	-	NN-NN
npl-4.1,npl-4.2	II	5624491	5633050	488	419	561	17.0411	15.8591	14.8112	-0.103705	-0.202322	+	gt-ag
E04D5.4,ZK673.1	II	10441825	10444358	229	196	145	7.99672	7.41857	3.82822	-0.108268	-1.06274	+	gt-ag
F59A2.2,golg-4	III	3411089	3416801	736	629	792	25.7013	23.8076	20.91	-0.11042	-0.297647	+	gt-ag
scrm-5,scrm-8	IV	4164226	4166037	122	104	70	4.26026	3.93638	1.8481	-0.114072	-1.2049	+	gt-ag
igdb-1,igdb-2	IV	12474319	12481906	183	156	197	6.39039	5.90458	5.20109	-0.114072	-0.29709	+	gt-ag
C01B4.7,C01B4.8,C13B7.6,F56A4.2,F56A4.3,F56A4.4,F56A4.5,Y19D10A.1,Y19D10A.16,Y19D10A.17,Y19D10A.18,Y19D10A.2,Y19D10A.4,nas-2,srd-60,srd-75,srd-76,srt-1,str-120	V	2388665	2497561	27	23	95	0.942845	0.870546	2.50814	-0.1151	1.41153	+	gt-ag
C01B4.7,C01B4.8,C13B7.6,F56A4.2,F56A4.3,F56A4.4,F56A4.5,Y19D10A.1,Y19D10A.16,Y19D10A.17,Y19D10A.18,Y19D10A.2,Y19D10A.4,nas-2,srd-60,srd-75,srd-76,srt-1,str-120	V	2389560	2498873	154	130	487	5.37771	4.92048	12.8575	-0.128193	1.25755	+	gt-ag
F54D5.3,F54D5.4	II	11570415	11572744	134	112	168	4.67931	4.23918	4.43545	-0.142508	-0.0772136	+	gt-ag
fbxc-11,fbxc-4,fbxc-5	IV	900760	904957	1167	974	1063	40.7519	36.8657	28.0648	-0.144585	-0.538105	+	gt-ag
T19D12.1,T19D12.2	II	6662255	6670668	362	302	469	12.6411	11.4307	12.3823	-0.145215	-0.0298436	+	gt-ag
C09F9.7,glna-1	II	14717875	14725167	318	265	285	11.1046	10.0302	7.52443	-0.146808	-0.561507	-	NN-NN
ZK418.13	III	7074829	7075674	59	49	17	2.06029	1.85464	0.448825	-0.151707	-2.19862	-	NN-NN
dot-1.1	I	2383444	2388157	41	34	84	1.43173	1.28689	2.21773	-0.153863	0.631324	-	NN-NN
Y39A1A.21,Y39A1A.22	III	10706540	10706956	423	350	373	14.7712	13.2474	9.84776	-0.157077	-0.584924	-	NN-NN
ctl-1,ctl-3	II	14305428	14309716	291	240	488	10.1618	9.08396	12.8839	-0.161759	0.34242	-	NN-NN
T20D4.3,T20D4.4	V	3417104	3422157	99	81	300	3.4571	3.06584	7.92045	-0.173281	1.19602	+	gt-ag
mes-3	I	4999690	5000237	174	142	217	6.07611	5.37468	5.72912	-0.17697	-0.0848341	+	gt-ag
Y58A7A.4,Y58A7A.5	V	5084698	5086693	108	88	65	3.77138	3.33079	1.7161	-0.17923	-1.13596	-	NN-NN
fbf-1,fbf-2	II	6079170	6089863	294	238	383	10.2665	9.00826	10.1118	-0.188629	-0.0219136	-	NN-NN
C49A9.3,C49A9.4	IV	6222210	6222542	187	151	104	6.53007	5.71533	2.74576	-0.192264	-1.2499	+	gt-ag
skr-1,skr-2	I	9470235	9472150	923	745	1172	32.2313	28.1981	30.9425	-0.192864	-0.0588718	+	gt-ag
AC8.11,AC8.3,AC8.4,AC8.9	X	226900	236361	144	116	90	5.02851	4.39058	2.37613	-0.195718	-1.08151	-	NN-NN
Y48A6C.1,Y48A6C.2,sup-35	III	11106204	11118947	97	78	204	3.38726	2.95229	5.3859	-0.198285	0.669071	-	NN-NN
F56A4.11,F56A4.12,F56A4.6,irld-35,mct-1,mct-2,srd-71	V	2376768	2485660	1030	828	1134	35.9678	31.3397	29.9393	-0.198716	-0.264666	-	NN-NN
F54D7.6,F54D7.7	I	4789277	4790413	36657	29104	38501	1280.07	1101.58	1016.48	-0.216645	-0.332635	+	gt-ag
pmp-1,pmp-2	II	6881228	6885030	346	274	463	12.0824	10.3709	12.2239	-0.22037	0.0167983	-	NN-NN
C25F9.11,C25F9.4,M04C3.1,M04C3.2,linc-28,srw-85	V	19411398	19446634	199	157	105	6.94912	5.94243	2.77216	-0.225778	-1.32582	-	NN-NN
C17G10.9,F59E12.15,F59E12.16,F59E12.6	II	5621797	5630871	1051	820	913	36.7011	31.0369	24.1046	-0.241841	-0.606518	-	NN-NN
C13B7.6,F56A4.2,F56A4.3,F56A4.4,F56A4.5,Y19D10A.1,Y19D10A.16,Y19D10A.17,Y19D10A.18,Y19D10A.2,Y19D10A.4,Y19D10A.5,Y19D10A.6,clec-209,srd-60,srd-75,srd-76,srt-1,str-120	V	2351761	2459790	1519	1185	1991	53.0438	44.8521	52.5654	-0.242009	-0.0130705	+	gt-ag
D2096.11,D2096.16,M116.5,sdz-25	IV	8390830	8416668	206	160	331	7.19356	6.05597	8.73889	-0.248346	0.280745	-	NN-NN
act-2,act-3	V	11072171	11077112	88373	68557	114957	3086	2594.87	3035.04	-0.250076	-0.0240251	-	NN-NN
thn-1,thn-2,thn-3	IV	12380361	12383477	40	31	36	1.39681	1.17335	0.950454	-0.251506	-0.555445	+	gt-ag
D2096.11,D2096.16,M116.5,sdz-25	IV	8390830	8418210	39	30	131	1.36189	1.1355	3.4586	-0.262286	1.34458	-	NN-NN
F40F12.7,F40F12.8,F40F12.9,K11H3.2,K11H3.3,K11H3.4,K11H3.5,K11H3.8,R10E11.6,ZK632.11,ZK632.12,ZK632.14,ZK632.2,ZK632.5,ZK757.10,arl-5,cbp-1,cbp-2,mam-7,mcm-6,panl-3,twk-48,usp-46,vha-2	III	9768547	9923624	349	267	239	12.1871	10.1059	6.30996	-0.270161	-0.949658	+	gt-ag
C01B4.6,C01B4.7,C01B4.8,C13B7.6,F56A4.2,F56A4.3,F56A4.4,F56A4.5,Y19D10A.1,Y19D10A.16,Y19D10A.17,Y19D10A.18,Y19D10A.2,nas-2,srd-60,srd-76,srt-1,str-120	V	2393167	2501495	147	112	192	5.13327	4.23918	5.06909	-0.276091	-0.0181517	+	gt-ag
adt-1	X	12687298	12687687	88	67	47	3.07298	2.53594	1.24087	-0.277116	-1.30828	+	gt-ag
F40F12.7,F40F12.9,K11H3.2,K11H3.3,K11H3.4,K11H3.5,K11H3.8,R10E11.6,ZK632.11,ZK632.12,ZK632.14,ZK632.2,ZK632.5,ZK757.10,arl-5,cbp-1,mam-7,mcm-6,panl-3,twk-48,usp-46,vha-2	III	9768547	9915037	695	529	860	24.2695	20.0226	22.7053	-0.277519	-0.0961182	+	gt-ag
rpa-4	I	5509904	5510834	571	434	716	19.9394	16.4268	18.9035	-0.27957	-0.076973	-	NN-NN
sms-1	IV	11486108	11498083	128	97	150	4.46978	3.67143	3.96022	-0.283861	-0.174623	-	NN-NN
K08D9.4,Y73C8B.1	V	3195648	3198881	289	219	300	10.0919	8.28912	7.92045	-0.283913	-0.349549	-	NN-NN
F35F10.6,F35F10.7	V	3286513	3288198	107	81	127	3.73646	3.06584	3.35299	-0.285391	-0.156224	-	NN-NN
AC8.11,AC8.3,AC8.4,AC8.9	X	227169	236632	49	37	122	1.71109	1.40044	3.22098	-0.289031	0.912586	-	NN-NN
C09F9.7,glna-1	II	14713521	14721349	394	296	423	13.7586	11.2036	11.1678	-0.296372	-0.30098	-	NN-NN
act-2,act-3	V	11073005	11077938	35861	26868	47148	1252.27	1016.95	1244.78	-0.300301	-0.00866099	-	NN-NN
D2096.11	IV	8390830	8391644	39	29	131	1.36189	1.09765	3.4586	-0.311195	1.34458	-	NN-NN
D2096.11,D2096.16,M116.5,sdz-25	IV	8390830	8417430	39	29	131	1.36189	1.09765	3.4586	-0.311195	1.34458	-	NN-NN
F57F4.4,gfi-1	V	6393356	6402056	3340	2479	15131	116.633	93.8298	399.481	-0.313864	1.77615	-	NN-NN
npl-4.1,npl-4.2	II	5623040	5631554	2135	1577	2137	74.5546	59.6892	56.42	-0.320827	-0.402091	+	gt-ag
C17G10.9,F59E12.15,F59E12.16,F59E12.6	II	5621615	5630127	2439	1800	3429	85.1703	68.1297	90.5307	-0.322067	0.0880563	-	NN-NN
pgp-6,pgp-7	X	10868600	10874900	19	14	109	0.663484	0.529898	2.87776	-0.324347	2.11681	-	NN-NN
C01B4.6,C01B4.7,C01B4.8,C13B7.6,F56A4.2,F56A4.3,F56A4.4,F56A4.5,Y19D10A.1,Y19D10A.16,Y19D10A.17,Y19D10A.18,Y19D10A.2,nas-2,srd-60,srd-76,srt-1,str-120	V	2393314	2501782	41	30	77	1.43173	1.1355	2.03291	-0.334435	0.505793	+	gt-ag
nhr-48	X	15711892	15712034	26	19	24	0.907925	0.719147	0.633636	-0.336286	-0.518919	+	gt-ag
ugt-19,ugt-20	IV	6077524	6082007	85	62	169	2.96822	2.34669	4.46185	-0.338969	0.588047	-	NN-NN
unc-68	V	6913879	6914458	260	188	413	9.07925	7.11577	10.9038	-0.351553	0.264188	-	NN-NN
Y51H4A.19,sta-1	IV	16666091	16678141	101	73	243	3.52694	2.76304	6.41556	-0.352161	0.863159	+	gt-ag
C06E7.4,C06E7.88,C11D2.4,C11D2.7,C46G7.5,C49A9.10,F58F9.6,F58F9.7,H04M03.11,H04M03.12,H10D12.2,H32C10.101,K02B2.6,K08B4.2,K08B4.5,K08B4.7,M03D4.3,M03D4.4,aat-4,cpi-1,inx-7,mcu-1,nlp-16,pqn-22,rps-25,sams-4,sams-5,spe-27,srv-17,srv-18,srv-19,srv-20,srv-21,	IV	5845380	6278577	408	293	590	14.2474	11.09	15.5769	-0.361443	0.128704	-	NN-NN
math-26,math-27	II	1769599	1773481	949	679	664	33.1393	25.7	17.5306	-0.366771	-0.918667	+	gt-ag
T04A11.2,T04A11.4,T04A11.5	IV	12478387	12485978	42	30	160	1.46665	1.1355	4.22424	-0.369201	1.52617	-	NN-NN
pgp-6,pgp-7	X	10867301	10873608	411	292	471	14.3522	11.0522	12.4351	-0.376944	-0.206853	-	NN-NN
C28A5.1,C28A5.2	III	4432307	4437557	249	175	249	8.69513	6.62372	6.57397	-0.392565	-0.403442	-	NN-NN
C09F9.2,C09F9.4	II	14711718	14718838	357	249	270	12.4665	9.42461	7.1284	-0.403552	-0.806407	+	gt-ag
ubq-1	III	5941863	5943383	1947	1350	1561	67.9896	51.0973	41.2127	-0.412068	-0.722224	+	gt-ag
fog-2,ftr-1	V	20197254	20199591	284	196	629	9.91733	7.41857	16.6065	-0.418811	0.743727	+	gt-ag
F10E7.11,T07F8.4	II	7121374	7131430	572	394	601	19.9743	14.9128	15.8673	-0.421594	-0.332092	-	NN-NN
nhr-201,nhr-202,nhr-203	V	460126	466117	69	47	35	2.40949	1.77894	0.924052	-0.43771	-1.38268	+	gt-ag
C03C10.4,C03C10.5,C14B1.7,C14B1.9,C16C10.8,C16C10.9,C36A4.10,C36A4.14,C36A4.4,C36E8.1,C44F1.1,F34D10.6,F34D10.9,F37A8.2,R10E9.2,R13G10.4,T02C12.4,T02C12.5,Y1A5A.1,Y1A5A.2,ZK1058.5,ZK1058.9,acy-3,brc-1,ccdc-55,cyp-25A3,cyp-25A4,dpy-27,evl-18,glb-11,hrde-1,	III	3723161	4175783	225	153	123	7.85704	5.79103	3.24738	-0.440167	-1.27471	-	NN-NN
F40F12.7,F40F12.9,K11H3.2,K11H3.3,K11H3.4,K11H3.5,K11H3.8,R10E11.6,ZK632.11,ZK632.12,ZK632.14,ZK632.2,ZK632.5,ZK757.10,arl-5,cbp-1,mam-7,mcm-6,panl-3,twk-48,usp-46,vha-2	III	9768829	9915204	478	325	624	16.6918	12.3012	16.4745	-0.440345	-0.0189064	+	gt-ag
ctl-1,ctl-3	II	14304142	14309389	1658	1126	2224	57.8977	42.6189	58.7169	-0.442011	0.0202709	-	NN-NN
Y71H2AM.15	III	2749110	2750015	46	31	29	1.60633	1.17335	0.765643	-0.45314	-1.06902	-	NN-NN
C32H11.16,C32H11.6,C32H11.8	IV	12926291	12934550	153	103	182	5.34279	3.89853	4.80507	-0.454661	-0.153035	-	NN-NN
D2062.4,D2062.5	II	2622952	2624143	195	131	92	6.80944	4.95833	2.42894	-0.457681	-1.48721	+	gt-ag
C53A3.2,K09H11.11,K09H11.7	V	5752646	5762878	2092	1400	3208	73.053	52.9898	84.696	-0.46323	0.213349	-	NN-NN
Y47G6A.21,Y47G6A.22	I	3558331	3561405	658	440	618	22.9775	16.6539	16.3161	-0.464358	-0.493923	-	NN-NN
F07B7.12,rpm-1	V	8817872	8860113	350	234	216	12.2221	8.85686	5.70272	-0.46462	-1.09977	-	NN-NN
F28B4.3,drd-2	X	3228555	3236919	927	619	1347	32.371	23.4291	35.5628	-0.466404	0.135667	-	NN-NN
unc-68	V	6908598	6908956	293	195	464	10.2316	7.38072	12.2503	-0.471201	0.259782	-	NN-NN
fbxc-1,fbxc-10,fbxc-2,fbxc-4	IV	891330	899840	2753	1819	1378	96.1353	68.8489	36.3813	-0.481633	-1.40187	+	gt-ag
C01G10.10,C01G10.14,C01G10.15,C01G10.18,C01G10.19,C01G10.5,C01G10.8,C25D7.1,C25D7.2,fbxa-82,mcm-3,rap-2,sdc-3	V	15036654	15105808	172	113	48	6.00627	4.27703	1.26727	-0.48986	-2.24474	-	NN-NN
F56A4.11,F56A4.12,F56A4.6,irld-35,mct-1,mct-2,srd-71	V	2378271	2487062	591	387	705	20.6378	14.6479	18.6131	-0.494599	-0.148977	-	NN-NN
F07B7.12,rpm-1	V	8819700	8861863	283	184	292	9.88241	6.96437	7.70924	-0.50487	-0.358276	-	NN-NN
F56A4.11,F56A4.12,F56A4.6,irld-35,mct-1,mct-2,srd-71	V	2375341	2484262	148	96	165	5.16819	3.63358	4.35625	-0.508265	-0.246573	-	NN-NN
ZC204.12,ZC204.13	II	1657114	1660858	107	69	205	3.73646	2.61164	5.41231	-0.516717	0.534571	-	NN-NN
T20D4.3,T20D4.4,T20D4.5	V	3413688	3418657	76	49	47	2.65393	1.85464	1.24087	-0.516992	-1.09678	+	gt-ag
T23E1.2,Y67D8C.3	IV	3056245	3140475	57	36	100	1.99045	1.36259	2.64015	-0.546739	0.407524	+	gt-ag
fbxc-10,fbxc-2,fbxc-4	IV	895482	899840	2861	1806	1378	99.9067	68.3568	36.3813	-0.547496	-1.45739	+	gt-ag
math-26,math-27	II	1767923	1771809	192	121	134	6.70468	4.57983	3.5378	-0.549873	-0.922315	+	gt-ag
C01B4.7,C01B4.8,C13B7.6,F56A4.2,F56A4.3,F56A4.4,F56A4.5,Y19D10A.1,Y19D10A.16,Y19D10A.17,Y19D10A.18,Y19D10A.2,Y19D10A.4,nas-2,srd-60,srd-75,srd-76,srt-1,str-120	V	2386241	2494568	178	112	410	6.21579	4.23918	10.8246	-0.552153	0.800305	+	gt-ag
R05D3.6,ZC262.10,ZC262.12,ZC262.5,ZC262.7	III	8342307	8350725	2839	1767	2896	99.1384	66.8807	76.4587	-0.567855	-0.374763	-	NN-NN
C09E7.6,C09E7.7,C09E7.8	III	6543202	6555299	272	168	333	9.49829	6.35877	8.7917	-0.578919	-0.111526	-	NN-NN
C27C7.2,ZK1025.2,ZK1025.4,ZK1025.5,nhr-73	I	11433359	11456797	78	48	16	2.72377	1.81679	0.422424	-0.584214	-2.68884	-	NN-NN
F57F4.4,gfi-1	V	6398944	6408382	379	232	82	13.2348	8.78116	2.16492	-0.591847	-2.61194	-	NN-NN
Y48A6C.1,Y48A6C.2,sup-35	III	11105668	11117889	201	123	260	7.01896	4.65553	6.86439	-0.592311	-0.0321257	-	NN-NN
fbxc-1,fbxc-2	IV	891330	895688	3483	2129	1590	121.627	80.5823	41.9784	-0.593929	-1.53475	+	gt-ag
math-26,math-27	II	1770128	1774001	115	70	105	4.01582	2.64949	2.77216	-0.599981	-0.534686	+	gt-ag
ctl-1,ctl-2	II	14301894	14306200	3128	1896	2536	109.23	71.7633	66.9542	-0.606056	-0.706128	-	NN-NN
T24E12.5	II	3754423	3754873	76	46	83	2.65393	1.74109	2.19132	-0.60814	-0.27633	+	gt-ag
fbxc-43,fbxc-44	II	4235676	4237489	144	87	26	5.02851	3.29294	0.686439	-0.610756	-2.87293	-	NN-NN
Y59E9AL.2,Y59E9AL.3	IV	5219712	5227820	391	235	147	13.6538	8.89471	3.88102	-0.618282	-1.81479	+	gt-ag
F36H5.14,math-26,math-3	II	1773954	1777681	100	60	17	3.49202	2.27099	0.448825	-0.62074	-2.95984	+	gt-ag
nhr-201,nhr-202	V	462739	465940	146	85	13	5.09835	3.21724	0.343219	-0.664208	-3.89283	+	gt-ag
Y57A10B.2,marc-5	II	12367023	12376456	62	36	127	2.16505	1.36259	3.35299	-0.668045	0.631047	-	NN-NN
Y47G6A.21,Y47G6A.22	I	3558568	3562538	750	435	934	26.1901	16.4647	24.659	-0.669649	-0.0869099	-	NN-NN
klp-11	IV	8756136	8756439	359	207	210	12.5363	7.83492	5.54431	-0.678127	-1.17704	-	NN-NN
C07E3.10,C07E3.4,C07E3.8,C07E3.9,F33H1.3,F33H1.4,F54B3.1,M02G9.1,M02G9.2,M02G9.3,M02G9.4,R05H5.3,R05H5.7,T01E8.1,T01E8.8,T09F3.2,ZK970.7,anr-52,atad-3,gpd-1,gpd-4,mdt-22,plc-3,ref-1,srb-6,ztf-27	II	10171802	10394712	344	198	223	12.0125	7.49427	5.88753	-0.680682	-1.02881	+	gt-ag
AC3.9,ugt-49	V	10372724	10375288	40	23	38	1.39681	0.870546	1.00326	-0.68214	-0.477442	+	gt-ag
zip-12	III	12327985	12330573	21	12	18	0.733324	0.454198	0.475227	-0.691129	-0.625834	+	gt-ag
R09B3.2,R09B3.3	I	11909731	11910935	959	547	1082	33.4885	20.7039	28.5664	-0.693764	-0.229344	-	NN-NN
C09F9.2,C09F9.4	II	14711624	14718740	645	367	577	22.5235	13.8909	15.2337	-0.697293	-0.56417	+	gt-ag
etr-1	II	168047	168543	58	33	30	2.02537	1.24904	0.792045	-0.697361	-1.35453	+	gt-ag
W09D6.5	III	11089384	11090058	364	206	309	12.7109	7.79707	8.15806	-0.705068	-0.639773	+	gt-ag
fbxc-1,fbxc-10,fbxc-11,fbxc-5	IV	892456	904957	1040	587	813	36.317	22.2179	21.4644	-0.708925	-0.758698	+	gt-ag
fbxc-12,fbxc-3,fbxc-5	IV	904913	909109	1040	587	813	36.317	22.2179	21.4644	-0.708925	-0.758698	+	gt-ag
fbxc-1,fbxc-10,fbxc-11,fbxc-12,fbxc-3,fbxc-5	IV	892456	909109	1040	587	810	36.317	22.2179	21.3852	-0.708925	-0.764032	+	gt-ag
B0238.1,B0238.13	V	5242000	5244987	94	53	187	3.2825	2.00604	4.93708	-0.710442	0.588864	-	NN-NN
npl-4.1,npl-4.2	II	5624491	5633044	41	23	108	1.43173	0.870546	2.85136	-0.717764	0.993894	+	gt-ag
clec-67,clec-69	IV	3922985	3930249	296	166	375	10.3364	6.28307	9.90056	-0.718188	-0.0621484	+	gt-ag
ZK1320.2,ZK1320.3	II	9658498	9659970	1517	849	721	52.9739	32.1345	19.0355	-0.721159	-1.47659	-	NN-NN
F46F11.1	I	5635399	5635642	106	59	62	3.70154	2.23314	1.63689	-0.729051	-1.17717	+	gt-ag
wht-7	III	6143433	6143807	180	100	64	6.28563	3.78498	1.6897	-0.731771	-1.89529	-	NN-NN
C25F9.11,C25F9.4,M04C3.1,M04C3.2,linc-28,srw-85	V	19412791	19448223	76	42	78	2.65393	1.58969	2.05932	-0.739384	-0.365967	-	NN-NN
H23N18.4,ugt-8,ugt-9	V	4896205	4904201	38	21	71	1.32697	0.794847	1.87451	-0.739384	0.498378	+	gt-ag
E04D5.4,ZK673.1	II	10441079	10444217	69	38	13	2.40949	1.43829	0.343219	-0.744371	-2.81153	+	gt-ag
F17C8.3,F17C8.7,F17C8.9,F25F2.1,F35G12.11,F35G12.12,F35G12.5,F56F3.4,M88.4,R07E5.1,R07E5.13,R07E5.15,T04A8.13,T04A8.18,T04A8.7,T04A8.8,acy-1,cdh-4,cdka-1,cisd-3.1,cku-80,clec-151,clec-152,clec-153,clec-154,cpg-1,dnj-18,idhg-1,lips-3,lron-5,mab-21,mrpl-16,	III	4402110	4736925	166	91	125	5.79675	3.44434	3.30019	-0.751019	-0.812697	+	gt-ag
C09F9.2,C09F9.4	II	14711952	14719476	2742	1501	2402	95.7512	56.8126	63.4164	-0.753079	-0.594434	+	gt-ag
fbxc-10,fbxc-11,fbxc-2,fbxc-5	IV	896608	904957	1057	578	852	36.9106	21.8772	22.4941	-0.754608	-0.714492	+	gt-ag
fbxc-10,fbxc-11,fbxc-12,fbxc-2,fbxc-3,fbxc-5	IV	896608	909109	1057	578	851	36.9106	21.8772	22.4677	-0.754608	-0.716186	+	gt-ag
fbxc-11,fbxc-12,fbxc-3,fbxc-4,fbxc-5	IV	900760	909109	1057	578	851	36.9106	21.8772	22.4677	-0.754608	-0.716186	+	gt-ag
F40F12.7,F40F12.8,F40F12.9,K11H3.2,K11H3.3,K11H3.4,K11H3.5,K11H3.8,R10E11.6,ZK632.11,ZK632.12,ZK632.14,ZK632.2,ZK632.5,ZK757.10,arl-5,cbp-1,cbp-2,mam-7,mcm-6,panl-3,twk-48,usp-46,vha-2	III	9768368	9923366	144	78	122	5.02851	2.95229	3.22098	-0.768297	-0.64263	+	gt-ag
hum-2	V	9386286	9386384	1288	696	1588	44.9772	26.3435	41.9256	-0.771747	-0.101364	+	gt-ag
acox-2,acox-3	I	12946350	12950857	108	58	87	3.77138	2.19529	2.29693	-0.780681	-0.715386	+	gt-ag
Y73F8A.12,Y73F8A.14	IV	15311439	15318853	166	89	118	5.79675	3.36864	3.11538	-0.78308	-0.895838	-	NN-NN
Y37E11B.10,Y37E11B.9	IV	3603055	3605244	32	17	11	1.11745	0.643447	0.290416	-0.796311	-1.94401	-	NN-NN
T24E12.5	II	3754742	3755192	95	50	185	3.31742	1.89249	4.88428	-0.809773	0.558084	+	gt-ag
unc-89	I	4046102	4047965	21	11	15	0.733324	0.416348	0.396022	-0.81666	-0.888869	+	gt-ag
ZK1320.2,ZK1320.3	II	9658692	9660252	1029	539	912	35.9329	20.4011	24.0782	-0.81666	-0.577579	-	NN-NN
F57F4.4,gfi-1	V	6393086	6401817	776	405	7632	27.0981	15.3292	201.496	-0.821909	2.89449	-	NN-NN
ctl-1,ctl-2	II	14300187	14305156	359	187	138	12.5363	7.07792	3.64341	-0.82472	-1.78276	-	NN-NN
ctl-1,ctl-2,ctl-3	II	14300187	14309389	359	187	138	12.5363	7.07792	3.64341	-0.82472	-1.78276	-	NN-NN
acox-1,acox-2,acox-3	I	12940816	12949038	206	107	50	7.19356	4.04993	1.32007	-0.828808	-2.44609	+	gt-ag
F08A8.4,acox-2	I	12944804	12952685	414	214	374	14.457	8.09987	9.87416	-0.835794	-0.550034	+	gt-ag
F41E7.7	X	10311567	10312016	245	126	126	8.55545	4.76908	3.32659	-0.843132	-1.3628	+	gt-ag
T02G5.4,kat-1,msh-4	II	7075214	7083963	506	260	531	17.6696	9.84096	14.0192	-0.8444	-0.333867	+	gt-ag
fbxa-122,fbxa-123	I	12007092	12008698	39	20	35	1.36189	0.756997	0.924052	-0.847248	-0.559561	+	gt-ag
npa-1	V	7077603	7078076	888	455	744	31.0091	17.2217	19.6427	-0.848467	-0.658699	+	gt-ag
Y71G10AL.1	IV	2178403	2181077	65	33	51	2.26981	1.24904	1.34648	-0.861748	-0.753384	+	gt-ag
F12A10.2,F12A10.9,ZK177.2,ZK177.3,ZK177.4,cyp-44A1,fzy-1	II	5495386	5519967	265	134	206	9.25385	5.07188	5.43871	-0.867533	-0.76679	+	gt-ag
Y48A6C.2,hmt-1	III	11099130	11116151	583	292	429	20.3585	11.0522	11.3262	-0.881302	-0.84596	-	NN-NN
atfs-1	V	14195128	14196553	68	34	52	2.37457	1.28689	1.37288	-0.883774	-0.790465	+	gt-ag
Y57A10A.4,Y57A10A.5,Y57A10A.6	II	12152119	12157135	22	11	27	0.768244	0.416348	0.71284	-0.883774	-0.107986	+	gt-ag
F08A8.4,acox-3	I	12950814	12953794	541	268	512	18.8918	10.1438	13.5176	-0.89717	-0.482927	+	gt-ag
AC8.10,AC8.11,AC8.3,AC8.9	X	229350	238810	93	46	44	3.24758	1.74109	1.16167	-0.899371	-1.48317	-	NN-NN
npa-1	V	7077188	7079752	331	162	278	11.5586	6.13167	7.33961	-0.914611	-0.655188	+	gt-ag
C01B4.2,C01B4.6,C01B4.7,C01B4.8,F56A4.2,F56A4.3,Y45G12C.16,Y45G12C.3,Y45G12C.4,Y45G12C.6,nas-2,srbc-81,srd-61,srd-62,srd-73,srt-2,str-257,str-258	V	2453463	2556260	2886	1408	3149	100.78	53.2926	83.1383	-0.919198	-0.277619	+	gt-ag
C09E7.7,C09E7.8,F27B3.7	III	6548536	6561102	367	178	416	12.8157	6.73727	10.983	-0.927677	-0.222638	-	NN-NN
unc-132	V	3687172	3691967	64	31	52	2.23489	1.17335	1.37288	-0.929578	-0.703002	+	gt-ag
nspc-3,nspc-5	X	8537110	8538788	234	113	90	8.17132	4.27703	2.37613	-0.93396	-1.78195	+	gt-ag
C01B4.2,C01B4.6,C01B4.7,C01B4.8,F56A4.2,F56A4.3,Y45G12C.16,Y45G12C.3,Y45G12C.4,Y45G12C.6,gst-10,nas-2,srbc-81,srd-61,srd-62,srd-73,srt-2,str-257,str-258	V	2453463	2561792	3137	1511	3432	109.545	57.1911	90.6099	-0.937656	-0.273778	+	gt-ag
C09E7.7,C09E7.8,F27B3.7	III	6548706	6561315	341	162	399	11.9078	6.13167	10.5342	-0.957552	-0.176825	-	NN-NN
nspc-2,nspc-3,nspc-5	X	8535471	8538788	284	134	101	9.91733	5.07188	2.66655	-0.967432	-1.89498	+	gt-ag
C18G1.3	V	4761370	4762728	103	48	54	3.59678	1.81679	1.42568	-0.985312	-1.33505	+	gt-ag
pgp-6,pgp-7	X	10867448	10873945	379	176	508	13.2348	6.66157	13.412	-0.990396	0.0191888	-	NN-NN
F08A8.4,acox-2	I	12946350	12953794	235	109	197	8.20624	4.12563	5.20109	-0.992107	-0.657907	+	gt-ag
clec-49,clec-50	V	19749825	19753785	1179	544	958	41.1709	20.5903	25.2926	-0.999659	-0.702908	-	NN-NN
Y48A6C.1,Y48A6C.2,sup-35	III	11105788	11118786	185	85	171	6.46023	3.21724	4.51466	-1.00576	-0.516971	-	NN-NN
C25D7.12,C25D7.14	V	15033035	15035196	33	15	51	1.15237	0.567748	1.34648	-1.02128	0.224589	+	gt-ag
dig-1	III	6747189	6749223	230	104	426	8.03164	3.93638	11.247	-1.02882	0.485778	+	gt-ag
R09B3.2,R09B3.3	I	11909597	11910663	218	98	100	7.6126	3.70928	2.64015	-1.03725	-1.52777	-	NN-NN
ehbp-1	V	9553525	9553935	38	17	311	1.32697	0.643447	8.21086	-1.04424	2.6294	+	gt-ag
AH10.2,C15H11.1,C15H11.10,C15H11.11,C15H11.13,D1086.1,D1086.10,D1086.11,D1086.12,D1086.17,D1086.18,D1086.20,D1086.3,D1086.6,D1086.7,D1086.8,F14D7.10,F14D7.12,F14D7.14,F14D7.3,F14D7.6,F14D7.9,F23B12.1,F23B12.4,F23B12.7,F40G12.10,F40G12.11,F40G12.3,F40G12.7	V	14030368	14470352	399	178	543	13.9332	6.73727	14.336	-1.04829	0.0411216	+	gt-ag
B0238.1,B0238.13	V	5241742	5244716	97	43	39	3.38726	1.62754	1.02966	-1.05742	-1.71795	-	NN-NN
pxf-1	IV	10165533	10166468	139	61	26	4.85391	2.30884	0.686439	-1.07198	-2.82194	-	NN-NN
F55C9.5	V	19291029	19291368	23	10	15	0.803164	0.378498	0.396022	-1.08541	-1.02011	-	NN-NN
golg-4	III	3420444	3421896	1707	742	1359	59.6088	28.0846	35.8796	-1.08575	-0.732359	+	gt-ag
D2096.11,D2096.16,M116.5,sdz-25	IV	8391517	8416668	76	33	130	2.65393	1.24904	3.43219	-1.08731	0.370998	-	NN-NN
R07E4.1	X	5959236	5961222	67	29	72	2.33965	1.09765	1.90091	-1.09188	-0.299606	+	gt-ag
T16G1.4,T16G1.5,T16G1.6	V	12936961	12941632	398	171	696	13.8982	6.47232	18.3754	-1.10255	0.402877	-	NN-NN
M70.3	IV	2241424	2242336	137	58	32	4.78407	2.19529	0.844848	-1.12383	-2.50147	-	NN-NN
F10G8.8	I	10051604	10052408	36	15	26	1.25713	0.567748	0.686439	-1.14681	-0.872927	-	NN-NN
tbc-6	II	6848206	6849666	101	42	79	3.52694	1.58969	2.08572	-1.14967	-0.757873	+	gt-ag
Y54G2A.10,Y54G2A.32,Y54G2A.44	IV	2800298	2804312	83	34	141	2.89838	1.28689	3.72261	-1.17135	0.36107	+	gt-ag
T02B11.3,T02B11.4	V	866515	870854	110	45	319	3.84122	1.70324	8.42208	-1.17328	1.13261	-	NN-NN
T19A5.3	V	8941580	8941923	619	253	492	21.6156	9.57601	12.9895	-1.17458	-0.734723	-	NN-NN
H17B01.2,Y51H7C.1	II	1468947	1471699	744	304	98	25.9806	11.5064	2.58735	-1.17501	-3.32789	+	gt-ag
clec-65,clec-66	II	12901635	12904879	585	233	456	20.4283	8.81901	12.0391	-1.21188	-0.762845	+	gt-ag
C01B4.7,C01B4.8,C13B7.6,F56A4.2,F56A4.3,F56A4.4,F56A4.5,Y19D10A.1,Y19D10A.16,Y19D10A.17,Y19D10A.18,Y19D10A.2,Y19D10A.4,nas-2,srd-60,srd-75,srd-76,srt-1,str-120	V	2386403	2495458	176	70	246	6.14595	2.64949	6.49477	-1.21392	0.079641	+	gt-ag
cdk-9	I	11323581	11325747	68	27	118	2.37457	1.02195	3.11538	-1.21635	0.391738	+	gt-ag
C10G11.1,C10G11.6,C48E7.1,C48E7.6,C48E7.7,F26B1.1,F26B1.2,F26B1.5,F26B1.8,cebp-2,chdp-1,cof-2,col-58,ima-2,let-611,lpd-2,pnk-1,srg-14,srh-49,srh-50,srh-51	I	6234864	6329727	1915	759	860	66.8722	28.728	22.7053	-1.21895	-1.55838	+	gt-ag
H20E11.2,H20E11.3	IV	6824951	6827884	38	15	11	1.32697	0.567748	0.290416	-1.22481	-2.19194	+	gt-ag
C55B7.10,T05E7.4,T09B4.7,ZC328.5,cdc-25.1,dbr-1,ech-1.2,klu-2,mam-8,mdt-18,mut-2,nmtn-1	I	6160268	6502702	33	13	107	1.15237	0.492048	2.82496	-1.22773	1.29363	-	NN-NN
Y48A6C.1,Y48A6C.2,sup-35	III	11106397	11119141	240	94	277	8.38084	3.55789	7.31321	-1.23608	-0.19659	-	NN-NN
C01B4.2,C01B4.6,C01B4.7,C01B4.8,F56A4.2,F56A4.3,Y45G12C.16,Y45G12C.3,Y45G12C.4,Y45G12C.6,gst-10,nas-2,srbc-81,srd-61,srd-62,srd-73,srt-2,str-257,str-258	V	2453707	2564175	3352	1310	2663	117.052	49.5833	70.3072	-1.23923	-0.735412	+	gt-ag
Y39A3A.4	III	2073214	2076078	95	37	57	3.31742	1.40044	1.50489	-1.24418	-1.14041	-	NN-NN
cpsf-1	IV	2030384	2032622	36	14	11	1.25713	0.529898	0.290416	-1.24634	-2.11394	-	NN-NN
C01B4.7,C01B4.8,C13B7.6,F56A4.2,F56A4.3,F56A4.4,F56A4.5,Y19D10A.1,Y19D10A.16,Y19D10A.17,Y19D10A.18,Y19D10A.2,Y19D10A.4,nas-2,srd-60,srd-75,srd-76,srt-1,str-120	V	2386089	2494417	106	41	254	3.70154	1.55184	6.70598	-1.25414	0.857322	+	gt-ag
math-40,math-41	II	1829592	1831348	83	32	108	2.89838	1.21119	2.85136	-1.25881	-0.0235938	+	gt-ag
denn-4	IV	1929521	1933690	52	20	63	1.81585	0.756997	1.66329	-1.26229	-0.126602	+	gt-ag
mua-3	III	10168124	10170115	1084	407	997	37.8535	15.4049	26.3223	-1.29704	-0.524141	+	gt-ag
C34F6.10	X	11234311	11234508	188	70	98	6.565	2.64949	2.58735	-1.30908	-1.34332	-	NN-NN
wve-1	I	11925535	11927121	141	52	51	4.92375	1.96819	1.34648	-1.32289	-1.87057	-	NN-NN
let-805	III	2665025	2665502	186	68	403	6.49515	2.57379	10.6398	-1.33547	0.712035	+	gt-ag
ZK637.12,ZK637.15	III	8920804	8924946	72	26	50	2.51425	0.984096	1.32007	-1.35326	-0.929511	+	gt-ag
C25D7.12,C25D7.14	V	15032789	15034883	109	39	37	3.8063	1.47614	0.976855	-1.36656	-1.96217	+	gt-ag
B0280.13,B0280.2	III	7125440	7130036	199	71	40	6.94912	2.68734	1.05606	-1.37065	-2.71814	+	gt-ag
pes-4	III	1217809	1219387	306	107	101	10.6856	4.04993	2.66655	-1.39969	-2.00262	-	NN-NN
B0212.3,M57.1	IV	3538433	3542995	29	10	54	1.01269	0.378498	1.42568	-1.41983	0.493465	+	gt-ag
lgx-1	X	5531241	5535410	61	21	27	2.13013	0.794847	0.71284	-1.42219	-1.57929	-	NN-NN
egl-8	V	28699	30200	71	24	121	2.47933	0.908396	3.19458	-1.44856	0.365674	+	gt-ag
K09C6.7,K09C6.8	V	836820	842137	558	188	202	19.4855	7.11577	5.3331	-1.45331	-1.86935	-	NN-NN
Y24D9A.14,ell-1	IV	4394476	4408606	459	154	604	16.0284	5.82888	15.9465	-1.45934	-0.00738745	+	gt-ag
F48A9.1,F48A9.2	I	6593464	6594566	371	124	291	12.9554	4.69338	7.68283	-1.46485	-0.753842	+	gt-ag
F08A8.4,acox-1,acox-2,acox-3	I	12940816	12952685	189	63	29	6.59992	2.38454	0.765643	-1.46874	-3.1077	+	gt-ag
epg-8	I	9933488	9934153	54	18	22	1.88569	0.681297	0.580833	-1.46874	-1.6989	-	NN-NN
C04E12.10,C04E12.6,C17B7.10,C17B7.9,F35F10.13,F35F10.14,arrd-19,arrd-20,arrd-21,fbxa-65,scrm-3,srbc-2,srx-121	V	3314950	3390768	90	29	65	3.14282	1.09765	1.7161	-1.51765	-0.872927	-	NN-NN
fbxa-151,fbxa-78,fbxa-92	III	1258301	1266788	264	81	309	9.21893	3.06584	8.15806	-1.58832	-0.176373	-	NN-NN
ptp-1	III	3594323	3604815	33	10	87	1.15237	0.378498	2.29693	-1.60624	0.995108	+	gt-ag
tnt-3	X	7938662	7940324	33	10	29	1.15237	0.378498	0.765643	-1.60624	-0.589855	-	NN-NN
T02G5.4,kat-1,msh-4	II	7074024	7082887	53	16	278	1.85077	0.605597	7.33961	-1.61169	1.98758	+	gc-ag
oac-57,oac-58	IV	12307660	12311482	127	38	116	4.43486	1.43829	3.06257	-1.62453	-0.534146	-	NN-NN
ZK1320.2,ZK1320.3	II	9658011	9659444	340	101	294	11.8729	3.82283	7.76204	-1.63495	-0.61316	-	NN-NN
fln-2	X	9407498	9409794	34	10	161	1.18729	0.378498	4.25064	-1.64931	1.84001	+	gt-ag
Y53F4B.24,Y53F4B.62,Y53F4B.63	II	15128887	15133228	48	14	20	1.67617	0.529898	0.52803	-1.66138	-1.66648	-	NN-NN
F25B5.3	III	5950209	5952041	542	157	521	18.9267	5.94243	13.7552	-1.6713	-0.460451	+	gt-ag
C28A5.1,C28A5.2	III	4432494	4437740	197	57	142	6.87928	2.15744	3.74901	-1.67294	-0.875747	-	NN-NN
H11E01.3	X	1611869	1613171	333	95	452	11.6284	3.59573	11.9335	-1.6933	0.0373587	+	gt-ag
nspc-4,nspc-6	X	8538300	8541494	259	71	108	9.04433	2.68734	2.85136	-1.75084	-1.66536	-	NN-NN
H12D21.2,ZC412.9	V	14881551	14887962	254	69	24	8.86973	2.61164	0.633636	-1.76393	-3.80716	-	NN-NN
T28A8.3	III	13506325	13506857	321	87	164	11.2094	3.29294	4.32984	-1.76726	-1.37232	+	gt-ag
C01B4.7,C01B4.8,C13B7.6,F56A4.2,F56A4.3,F56A4.4,F56A4.5,Y19D10A.1,Y19D10A.16,Y19D10A.17,Y19D10A.18,Y19D10A.2,Y19D10A.4,nas-2,srd-60,srd-75,srd-76,srt-1,str-120	V	2387392	2495730	115	31	92	4.01582	1.17335	2.42894	-1.77507	-0.72537	+	gt-ag
K09C6.8	V	841331	842137	265	71	119	9.25385	2.68734	3.14178	-1.78388	-1.55847	-	NN-NN
H12D21.2,ZC412.9	V	14881964	14888377	335	88	77	11.6983	3.33079	2.03291	-1.81236	-2.52467	-	NN-NN
Y48G1BL.8,Y48G1BM.2,snpc-3.2,snpc-3.3	I	216277	252424	80	21	33	2.79361	0.794847	0.871249	-1.81338	-1.68098	+	gt-ag
C01B4.8,C13B7.6,F56A4.2,F56A4.3,F56A4.4,F56A4.5,Y19D10A.1,Y19D10A.16,Y19D10A.17,Y19D10A.18,Y19D10A.2,Y19D10A.5,nas-2,srd-60,srd-75,srd-76,srt-1,str-120	V	2384056	2492432	128	33	21	4.46978	1.24904	0.554431	-1.83938	-3.01112	+	gt-ag
F46F11.1	I	5634235	5636717	64	16	37	2.23489	0.605597	0.976855	-1.88377	-1.19399	+	gt-ag
Y48G1BL.5,Y48G1BM.6,Y48G1BM.7,Y48G1BM.8,Y48G1BR.1	I	220350	255370	335	83	145	11.6983	3.14154	3.82822	-1.89675	-1.61155	-	NN-NN
T24E12.5	II	3754423	3755192	103	25	165	3.59678	0.946246	4.35625	-1.92642	0.27638	+	gt-ag
nmy-1	X	2910340	2911111	690	163	359	24.0949	6.16952	9.47814	-1.9655	-1.34605	+	gt-ag
pad-1	I	12884176	12885017	48	11	170	1.67617	0.416348	4.48825	-2.0093	1.42099	+	gt-ag
C34C6.2,hgap-2	II	8675005	8680279	366	83	370	12.7808	3.14154	9.76855	-2.02443	-0.38776	-	NN-NN
C16C8.12,C16C8.13,C16C8.14	II	3450857	3453434	85	19	54	2.96822	0.719147	1.42568	-2.04524	-1.05795	+	gt-ag
C28A5.1,C28A5.2	III	4433203	4438449	99	22	109	3.4571	0.832697	2.87776	-2.0537	-0.264614	-	NN-NN
H12D21.2,ZC412.9	V	14881725	14888239	95	21	45	3.31742	0.794847	1.18807	-2.06131	-1.48144	-	NN-NN
Y59E9AL.2,Y59E9AL.3	IV	5219108	5227272	502	110	178	17.5299	4.16348	4.69947	-2.07396	-1.89925	+	gt-ag
F21C3.7	I	7278906	7279125	161	35	197	5.62215	1.32474	5.20109	-2.08541	-0.112307	-	NN-NN
C06C3.4,C06C3.9	II	9374477	9377908	137	29	234	4.78407	1.09765	6.17795	-2.12383	0.368891	+	gt-ag
C06E7.4,C06E7.88,C11D2.4,C11D2.7,C46G7.5,C49A9.10,F58F9.6,F58F9.7,H04M03.11,H04M03.12,H10D12.2,H32C10.101,K02B2.6,K08B4.2,K08B4.5,K08B4.7,M03D4.3,M03D4.4,aat-4,cpi-1,inx-7,mcu-1,nlp-16,pqn-22,rps-25,sams-4,sams-5,spe-27,srv-17,srv-18,srv-19,srv-20,srv-21,	IV	5845604	6278892	100	21	55	3.49202	0.794847	1.45208	-2.13531	-1.26594	-	NN-NN
olrn-1	X	15537740	15543198	177	37	118	6.18087	1.40044	3.11538	-2.14193	-0.988404	+	gt-ag
exc-4	I	14512791	14516483	67	14	15	2.33965	0.529898	0.396022	-2.14251	-2.56264	-	NN-NN
T20D4.3,T20D4.4	V	3417285	3422334	130	27	130	4.53962	1.02195	3.43219	-2.15125	-0.403442	+	gt-ag
C01B4.2,C01B4.6,C01B4.7,C01B4.8,F56A4.2,F56A4.4,Y45G12C.16,Y45G12C.3,Y45G12C.4,Y45G12C.6,gst-10,nas-2,srbc-81,srd-61,srd-62,srd-73,srt-2,str-257,str-258	V	2448175	2564175	991	205	643	34.6059	7.75922	16.9762	-2.15704	-1.02751	+	gt-ag
Y45G12C.3,gst-10	V	2556454	2564175	991	205	643	34.6059	7.75922	16.9762	-2.15704	-1.02751	+	gt-ag
got-2.1	I	4638440	4639559	73	15	107	2.54917	0.567748	2.82496	-2.16671	0.148201	-	NN-NN
taf-12	III	11865132	11869179	78	16	30	2.72377	0.605597	0.792045	-2.16918	-1.78195	-	NN-NN
T02B11.3,T02B11.4	V	865488	870733	288	58	357	10.057	2.19529	9.42533	-2.19572	-0.0935866	-	NN-NN
W05F2.4	I	3396928	3397511	81	16	52	2.82854	0.605597	1.37288	-2.22362	-1.04285	-	NN-NN
frm-1	I	14878993	14880610	169	33	112	5.90151	1.24904	2.95697	-2.24026	-0.996966	-	NN-NN
F19H8.2	II	14604514	14604963	108	20	80	3.77138	0.756997	2.11212	-2.31673	-0.836401	-	NN-NN
Y48G1BM.8,puf-10	I	215316	251476	358	66	191	12.5014	2.49809	5.04268	-2.3232	-1.30983	-	NN-NN
C03C10.4,C03C10.5,C14B1.7,C14B1.9,C16C10.8,C16C10.9,C36A4.10,C36A4.14,C36A4.4,C36E8.1,C44F1.1,F34D10.6,F34D10.9,F37A8.2,R10E9.2,R13G10.4,T02C12.4,T02C12.5,Y1A5A.1,Y1A5A.2,ZK1058.5,ZK1058.9,acy-3,brc-1,ccdc-55,cyp-25A3,cyp-25A4,dpy-27,evl-18,glb-11,hrde-1,	III	3722263	4174784	104	19	212	3.6317	0.719147	5.59712	-2.33629	0.624039	-	NN-NN
C09E7.6,C09E7.7,C09E7.8	III	6542313	6554423	238	43	60	8.311	1.62754	1.58409	-2.35233	-2.39137	-	NN-NN
K02E11.11,nep-21	V	14220136	14226063	67	12	22	2.33965	0.454198	0.580833	-2.3649	-2.0101	-	NN-NN
T23E1.2,Y67D8C.3	IV	3058816	3143864	101	18	290	3.52694	0.681297	7.65643	-2.37206	1.11826	+	gt-ag
C17B7.12,C17B7.2,C17B7.3,C17B7.4,C17B7.5,F35F10.1,F35F10.4,F35F10.5,srbc-3,str-63	V	3285135	3353421	124	22	129	4.3301	0.832697	3.40579	-2.37854	-0.346411	+	gt-ag
C09E7.7,C09E7.8,F27B3.7	III	6549361	6561930	172	28	82	6.00627	1.0598	2.16492	-2.50268	-1.47215	-	NN-NN
ehbp-1	V	9553525	9553782	91	14	172	3.17774	0.529898	4.54106	-2.58421	0.515028	+	gt-ag
F17C8.3,F17C8.7,F17C8.9,F25F2.1,F35G12.11,F35G12.12,F35G12.5,F56F3.4,M88.4,R07E5.1,R07E5.13,R07E5.15,T04A8.13,T04A8.18,T04A8.7,T04A8.8,acy-1,cdh-4,cdka-1,cisd-3.1,cku-80,clec-151,clec-152,clec-153,clec-154,cpg-1,dnj-18,idhg-1,lips-3,lron-5,mab-21,mrpl-16,	III	4401531	4736403	98	15	75	3.42218	0.567748	1.98011	-2.59159	-0.789333	+	gt-ag
fbxa-14,fbxa-15	III	1319225	1322412	127	19	124	4.43486	0.719147	3.27378	-2.62453	-0.43793	-	NN-NN
C16C8.13,C16C8.14	II	3450857	3452250	85	12	54	2.96822	0.454198	1.42568	-2.7082	-1.05795	+	gt-ag
clec-67,clec-69	IV	3923216	3930480	140	19	193	4.88883	0.719147	5.09549	-2.76513	0.0597322	+	gt-ag
npa-1	V	7077188	7078907	272	36	133	9.49829	1.36259	3.5114	-2.80131	-1.43562	+	gt-ag
F08A8.4,acox-2	I	12945191	12953476	81	10	151	2.82854	0.378498	3.98663	-2.9017	0.495113	+	gt-ag
F08A8.4,acox-3	I	12949370	12953476	81	10	151	2.82854	0.378498	3.98663	-2.9017	0.495113	+	gt-ag
unc-89	I	4053583	4055391	169	20	133	5.90151	0.756997	3.5114	-2.96273	-0.749039	+	gt-ag
oac-18,oac-6	V	16291622	16305630	237	28	29	8.27608	1.0598	0.765643	-2.96516	-3.4342	+	gt-ag
D2062.4,D2062.5	II	2623066	2624306	98	11	40	3.42218	0.416348	1.05606	-3.03905	-1.69622	+	gt-ag
C37A5.5,fipr-22,fipr-24	I	14152022	14157855	250	28	193	8.73005	1.0598	5.09549	-3.0422	-0.776769	+	gt-ag
ost-1	IV	1107633	1108816	172	18	181	6.00627	0.681297	4.77867	-3.14011	-0.329861	+	gt-ag
K09C6.7,K09C6.8	V	837145	842471	364	37	50	12.7109	1.40044	1.32007	-3.18212	-3.26738	-	NN-NN
B0564.2,B0564.6,B0564.7,B0564.9,C39E9.12,C39E9.18,C39E9.8,F09E8.12,F09E8.8,exos-4.1,msh-5,rde-11,rfc-3,scl-14,scl-5,scl-6,scl-7,scl-8,spin-2,tin-9.2,unc-30	IV	13064960	13166656	114	11	215	3.9809	0.416348	5.67632	-3.25723	0.511861	+	gt-ag
C01B4.2,C01B4.6,C01B4.7,C01B4.8,F56A4.2,F56A4.3,F56A4.4,F56A4.5,Y45G12C.16,Y45G12C.4,Y45G12C.6,nas-2,srbc-81,srd-61,srd-62,srd-73,srt-2,str-257,str-258	V	2438100	2546426	291	18	182	10.1618	0.681297	4.80507	-3.89872	-1.08052	+	gt-ag

## Sheet: D
Gene	Chromosome	Start	End	Splice junction score wt	Splice junction score alg-1	Splice junction score alg-2	Normalized wt	Normalized alg-1	Normalized alg-2	log2 fold change alg-1/wt	log5 fold change alg-2/wt	Strand	Splice site
Y48G1BM.6	I	236666	237531	29	26	125	1.01269	0.984096	3.30019	-0.0413153	1.70436	-	NN-NN
Y95B8A.8	I	861919	864398	50	23	61	1.74601	0.870546	1.61049	-1.00407	-0.116561	+	gt-ag
Y48G8AL.16	I	1215186	1217172	79	36	13	2.75869	1.36259	0.343219	-1.01763	-3.00678	-	NN-NN
Y71G12B.13	I	1702149	1702368	242	124	299	8.45069	4.69338	7.89405	-0.848441	-0.0983034	+	gt-ag
atg-5	I	1712828	1715187	10	88	65	0.349202	3.33079	1.7161	3.25373	2.297	+	gt-ag
mppa-1	I	1743270	1745737	168	62	189	5.86659	2.34669	4.98988	-1.3219	-0.233517	-	NN-NN
ddx-27	I	1785383	1786337	293	871	1227	10.2316	32.9672	32.3946	1.688	1.66272	+	gt-ag
Y71F9AL.12	I	2872762	2873115	161	132	211	5.62215	4.99618	5.57071	-0.170297	-0.0132595	-	NN-NN
K09H9.7	I	3151553	3151640	86	158	164	3.00314	5.98027	4.32984	0.993742	0.527845	-	NN-NN
rom-5	I	3220829	3220941	80	32	100	2.79361	1.21119	2.64015	-1.2057	-0.0815138	-	NN-NN
F47B3.3	I	3964600	3964746	180	194	173	6.28563	7.34287	4.56746	0.224286	-0.460667	+	gt-ag
inx-16	I	4164309	4164591	12	12	22	0.419042	0.454198	0.580833	0.116226	0.471027	+	gt-ag
gcy-28	I	4500922	4502564	43	287	307	1.50157	10.8629	8.10526	2.85487	2.43239	+	gt-ag
gcy-28	I	4501822	4502564	66	92	148	2.30473	3.48219	3.90742	0.595394	0.761617	+	gt-ag
bet-1	I	4526703	4527742	198	355	494	6.9142	13.4367	13.0423	0.958545	0.915569	-	NN-NN
bet-1	I	4529141	4529872	304	140	155	10.6157	5.29898	4.09223	-1.00242	-1.37524	-	NN-NN
D1007.15	I	4559693	4559989	117	68	110	4.08566	2.57379	2.90416	-0.666676	-0.492447	+	gt-ag
C44E4.1	I	4627200	4628068	181	223	599	6.32055	8.44051	15.8145	0.41728	1.32312	-	NN-NN
C44E4.1	I	4630181	4631501	152	29	117	5.30787	1.09765	3.08897	-2.27372	-0.781005	-	NN-NN
C44E4.1	I	4631303	4631501	153	185	208	5.34279	7.00222	5.49151	0.39022	0.03961	-	NN-NN
C44E4.1	I	4631859	4632596	180	308	303	6.28563	11.6578	7.99965	0.891159	0.347879	-	NN-NN
W09C3.2	I	4712499	4712642	121	89	29	4.22534	3.36864	0.765643	-0.326904	-2.46432	+	gt-ag
imb-1	I	4921450	4921998	627	421	572	21.895	15.9348	15.1017	-0.458419	-0.535892	-	NN-NN
let-363	I	5252949	5253201	197	174	385	6.87928	6.58587	10.1646	-0.0628824	0.563221	+	gt-ag
spe-11	I	5331959	5332092	34	18	14	1.18729	0.681297	0.369621	-0.801312	-1.68355	-	NN-NN
frm-4	I	5404355	5404521	86	56	146	3.00314	2.11959	3.85462	-0.502684	0.360118	-	NN-NN
F46F11.1	I	5628588	5628887	11	53	96	0.384122	2.00604	2.53454	2.38471	2.72209	+	gt-ag
pamn-1	I	5705452	5705856	432	589	419	15.0855	22.2936	11.0622	0.563462	-0.447523	+	gt-ag
mtk-1	I	5801115	5801198	58	83	60	2.02537	3.14154	1.58409	0.633284	-0.354532	-	NN-NN
B0207.6	I	5936673	5936786	41	37	32	1.43173	1.40044	0.844848	-0.0318727	-0.760994	-	NN-NN
C10G11.6	I	6292000	6292245	88	261	279	3.07298	9.87881	7.36602	1.6847	1.26125	+	gt-ag
C10G11.6	I	6292401	6293690	65	63	182	2.26981	2.38454	4.80507	0.0711381	1.08198	+	gt-ag
F26B1.2	I	6319342	6319442	350	226	217	12.2221	8.55406	5.72912	-0.514806	-1.0931	+	gt-ag
bli-4	I	6345556	6346973	73	296	510	2.54917	11.2036	13.4648	2.13585	2.40109	+	gt-ag
bli-4	I	6345556	6349908	36	19	85	1.25713	0.719147	2.24413	-0.805772	0.836024	+	gt-ag
knl-2	I	6462929	6463072	10	42	99	0.349202	1.58969	2.61375	2.18662	2.90399	+	gt-ag
F57B10.4	I	6567676	6567826	88	51	33	3.07298	1.93034	0.871249	-0.67078	-1.81848	+	gt-ag
let-607	I	6584155	6584275	172	284	466	6.00627	10.7494	12.3031	0.839708	1.03448	+	gt-ag
maco-1	I	6606217	6606308	56	20	147	1.95553	0.756997	3.88102	-1.3692	0.988876	-	NN-NN
pqn-20	I	6795906	6796023	174	215	111	6.07611	8.13772	2.93057	0.421475	-1.05197	+	gt-ag
pqn-20	I	6796766	6796867	345	157	348	12.0475	5.94243	9.18772	-1.01961	-0.390951	+	gt-ag
dpf-3	I	6839694	6839797	13	19	26	0.453962	0.719147	0.686439	0.663714	0.596558	+	gt-ag
hpo-11	I	7144603	7145452	70	82	199	2.44441	3.10369	5.2539	0.344495	1.1039	-	NN-NN
C01H6.6	I	7222075	7222298	52	26	31	1.81585	0.984096	0.818446	-0.883774	-1.14969	+	gt-ag
unc-13	I	7430742	7431004	31	16	37	1.08253	0.605597	0.976855	-0.83797	-0.148185	+	gt-ag
taf-5	I	7850057	7850521	138	112	68	4.81899	4.23918	1.7953	-0.184944	-1.4245	+	gt-ag
nud-2	I	7858293	7858553	95	160	287	3.31742	6.05597	7.57723	0.868298	1.19161	-	NN-NN
R05D11.9	I	8593649	8594037	161	241	270	5.62215	9.12181	7.1284	0.698198	0.342457	+	gt-ag
F43G9.8	I	8618639	8622512	38	14	11	1.32697	0.529898	0.290416	-1.32435	-2.19194	+	gt-ag
tlf-1	I	8701431	8701527	138	86	186	4.81899	3.25509	4.91068	-0.566034	0.0271925	-	NN-NN
cle-1	I	8708132	8708229	100	96	204	3.49202	3.63358	5.3859	0.0573323	0.625127	-	NN-NN
rbpl-1	I	9009937	9010067	558	345	1008	19.4855	13.0582	26.6127	-0.577443	0.449717	-	NN-NN
gld-4	I	9121190	9121734	139	234	158	4.85391	8.85686	4.17144	0.86765	-0.218602	+	gt-ag
gfi-2	I	9743109	9743393	109	92	190	3.8063	3.48219	5.01628	-0.128396	0.398229	+	gt-ag
rpl-30	I	10436287	10436474	1181	433	846	41.2407	16.389	22.3357	-1.33134	-0.884721	+	gt-ag
F49D11.6	I	10908902	10912051	20	34	244	0.698404	1.28689	6.44196	0.881761	3.20537	-	NN-NN
tag-296	I	10934236	10934901	230	234	383	8.03164	8.85686	10.1118	0.141101	0.332269	-	NN-NN
F32B4.4	I	11521997	11522131	16	33	81	0.558723	1.24904	2.13852	1.16062	1.93641	+	gt-ag
sri-11	I	11694831	11695339	130	128	147	4.53962	4.84478	3.88102	0.0938582	-0.226137	-	NN-NN
R06C1.4	I	11930834	11931062	215	367	452	7.50784	13.8909	11.9335	0.887669	0.668544	+	gt-ag
hrp-2	I	12060959	12061499	11	12	33	0.384122	0.454198	0.871249	0.241757	1.18152	-	NN-NN
Y40B1A.2,Y40B1A.3	I	13347618	13353001	34	67	46	1.18729	2.53594	1.21447	1.09485	0.0326573	+	gt-ag
Y40B1A.3	I	13353245	13354060	130	122	100	4.53962	4.61768	2.64015	0.0245955	-0.781953	+	gt-ag
vars-2	I	13550418	13551822	305	244	508	10.6507	9.23536	13.412	-0.205702	0.332577	-	NN-NN
agef-1	I	13618970	13619613	192	120	143	6.70468	4.54198	3.77541	-0.561846	-0.828533	-	NN-NN
W04A4.2,W04A4.5,W04A8.2,W04A8.6,W04A8.9,W09C5.9,Y37H9A.1,Y37H9A.3,Y37H9A.4,Y6B3B.3,Y6B3B.4,Y6B3B.7,Y71A12B.10,Y71A12B.13,Y71A12B.3,Y71A12B.8,clec-111,clec-112,fbxa-93,rps-6,taf-1,trp-4	I	13659743	13967596	87	85	63	3.03806	3.21724	1.66329	0.0826734	-0.869105	+	gt-ag
taf-1	I	13873198	13875709	64	15	77	2.23489	0.567748	2.03291	-1.97688	-0.136655	+	gt-ag
mys-2	I	14122095	14123145	20	46	74	0.698404	1.74109	1.95371	1.31786	1.48408	+	gt-ag
C23H3.9	II	77049	77159	157	41	109	5.48247	1.55184	2.87776	-1.82084	-0.929878	-	NN-NN
pqn-85	II	252702	253213	163	252	449	5.69199	9.53816	11.8543	0.744778	1.0584	-	NN-NN
T23F4.2	II	1164337	1164432	40	13	71	1.39681	0.492048	1.87451	-1.50526	0.424377	+	gt-ag
jip-1	II	1346336	1347314	44	107	44	1.53649	4.04993	1.16167	1.39826	-0.403442	+	gt-ag
F59H6.5,math-19,math-20,math-32	II	1997520	2010910	36	116	79	1.25713	4.39058	2.08572	1.80428	0.730414	+	gt-ag
K09F6.3	II	2260074	2260560	173	74	34	6.04119	2.80089	0.897651	-1.10895	-2.75061	+	gt-ag
tsr-1	II	2468320	2468912	168	207	321	5.86659	7.83492	8.47488	0.417396	0.53067	-	NN-NN
ubc-15	II	2905825	2908642	276	236	643	9.63797	8.93256	16.9762	-0.109655	0.816709	-	NN-NN
ZC239.15	II	3223217	3223793	27	18	50	0.942845	0.681297	1.32007	-0.468737	0.485527	-	NN-NN
F39E9.10	II	3303499	3303644	195	285	108	6.80944	10.7872	2.85136	0.663714	-1.25588	-	NN-NN
F39E9.7	II	3306498	3306637	12	79	68	0.419042	2.99014	1.7953	2.83504	2.09906	-	NN-NN
cyh-1	II	3507609	3508470	61	31	38	2.13013	1.17335	1.00326	-0.860315	-1.08625	+	gt-ag
F53C3.13	II	3920386	3924461	585	403	728	20.4283	15.2535	19.2203	-0.421431	-0.08794	-	NN-NN
F53C3.13	II	3923156	3924461	44	85	186	1.53649	3.21724	4.91068	1.06619	1.67629	-	NN-NN
F53C3.13	II	3926085	3926917	15	76	65	0.523803	2.87659	1.7161	2.45726	1.71204	-	NN-NN
madf-3	II	4336270	4337064	207	460	245	7.22848	17.4109	6.46837	1.26823	-0.160291	+	gt-ag
unc-85	II	4702895	4702985	11	149	69	0.384122	5.63963	1.8217	3.87596	2.24565	+	gt-ag
eif-1	II	4993082	4993273	42	21	32	1.46665	0.794847	0.844848	-0.883774	-0.795759	-	NN-NN
rpl-22	II	5055744	5055824	10	52	28	0.349202	1.96819	0.739242	2.49474	1.08198	+	gt-ag
gcy-12	II	5317011	5317137	72	11	50	2.51425	0.416348	1.32007	-2.59427	-0.929511	+	gt-ag
F07F6.4	II	5426596	5427574	1725	1398	2039	60.2373	52.9141	53.8326	-0.187006	-0.162176	-	NN-NN
tag-234	II	5864971	5865467	69	13	13	2.40949	0.492048	0.343219	-2.29186	-2.81153	+	gt-ag
C18H9.3	II	6684304	6684696	66	20	106	2.30473	0.756997	2.79856	-1.60624	0.280084	+	gt-ag
C18H9.3	II	6684801	6685109	659	1069	1101	23.0124	40.4615	29.068	0.814137	0.337022	+	gt-ag
C15F1.1	II	6989956	6990070	43	177	262	1.50157	6.69942	6.91719	2.15757	2.20372	+	gt-ag
tcer-1	II	7048527	7048802	20	21	53	0.698404	0.794847	1.39928	0.186615	1.00255	-	NN-NN
fust-1	II	7153010	7153139	20	274	112	0.698404	10.3709	2.95697	3.89233	2.08198	+	gt-ag
skpo-3	II	7246569	7247341	36	252	105	1.25713	9.53816	2.77216	2.92358	1.14088	+	gt-ag
skpo-3	II	7247246	7247341	90	278	390	3.14282	10.5223	10.2966	1.74331	1.71204	+	gt-ag
klp-3	II	7843481	7843643	62	259	75	2.16505	9.80311	1.98011	2.17884	-0.128819	+	gt-ag
K02C4.5	II	8079562	8079965	74	22	18	2.58409	0.832697	0.475227	-1.6338	-2.44297	+	gt-ag
K02C4.3	II	8082431	8082743	126	91	300	4.39994	3.44434	7.92045	-0.353259	0.848097	-	NN-NN
F28C6.4	II	8598869	8599030	27	42	26	0.942845	1.58969	0.686439	0.753656	-0.45789	-	NN-NN
sftd-3	II	8962717	8963883	40	12	29	1.39681	0.454198	0.765643	-1.62074	-0.867389	-	NN-NN
szy-20	II	8968012	8968127	166	187	257	5.79675	7.07792	6.78518	0.288081	0.227143	-	NN-NN
T24B8.4	II	9065713	9066056	100	336	431	3.49202	12.7175	11.379	1.86469	1.70425	-	NN-NN
43617	II	9120918	9121382	24	20	93	0.838084	0.756997	2.45534	-0.146808	1.55075	+	gt-ag
F54B3.1	II	10262188	10262876	112	247	201	3.91106	9.34891	5.3067	1.25724	0.440255	+	gt-ag
C06A1.2	II	10571005	10571832	198	84	189	6.9142	3.17939	4.98988	-1.12081	-0.470556	+	gt-ag
gmps-1	II	10868436	10868643	667	791	1584	23.2918	29.9392	41.82	0.362217	0.844372	-	NN-NN
ptp-3	II	10985555	10986071	22	34	10	0.768244	1.28689	0.264015	0.744257	-1.54095	+	gt-ag
F37H8.2	II	11173013	11173532	74	226	352	2.58409	8.55406	9.29333	1.72695	1.84654	-	NN-NN
rsp-2	II	11452371	11452516	49	177	115	1.71109	6.69942	3.03617	1.96912	0.827338	-	NN-NN
mfn-1	II	11471769	11471958	66	39	109	2.30473	1.47614	2.87776	-0.642766	0.320348	-	NN-NN
F54D5.17	II	11556800	11556916	303	280	136	10.5808	10.598	3.5906	0.002335	-1.55915	+	gt-ag
npp-3	II	11873608	11873754	63	187	123	2.19997	7.07792	3.24738	1.68584	0.561793	-	NN-NN
ash-2	II	11982254	11983001	145	179	286	5.06343	6.77512	7.55083	0.420133	0.57652	+	gt-ag
Y57A10A.24	II	12245075	12245276	64	54	20	2.23489	2.04389	0.52803	-0.128887	-2.08151	+	gt-ag
F42G4.2	II	13048057	13048348	134	164	105	4.67931	6.20737	2.77216	0.407689	-0.755286	+	gt-ag
ztf-22	II	13281507	13282572	222	32	68	7.75228	1.21119	1.7953	-2.67819	-2.11039	-	NN-NN
Y48C3A.12	II	13387565	13388468	85	237	56	2.96822	8.97041	1.47848	1.59558	-1.00548	+	gt-ag
lin-38	II	13576299	13577292	298	196	163	10.4062	7.41857	4.30344	-0.488233	-1.27388	+	gt-ag
F01D5.6	II	14007531	14007838	118	208	220	4.12058	7.87277	5.80833	0.934023	0.495275	+	gt-ag
unc-52	II	14653581	14653661	19	47	40	0.663484	1.77894	1.05606	1.42289	0.670559	-	NN-NN
C09F9.7	II	14714679	14715059	160	430	275	5.58723	16.2754	7.26041	1.54249	0.377918	-	NN-NN
C09F9.7,glna-1	II	14714679	14722129	159	345	176	5.55231	13.0582	4.64666	1.2338	-0.256893	-	NN-NN
Y46E12BL.2	II	15237777	15238942	33	26	16	1.15237	0.984096	0.422424	-0.227728	-1.44784	+	gt-ag
hpo-29	III	236062	237300	89	295	109	3.1079	11.1657	2.87776	1.84506	-0.110991	+	gt-ag
Y50D7A.8	III	338056	338296	48	41	151	1.67617	1.55184	3.98663	-0.111185	1.25	-	NN-NN
F10C5.2	III	473982	474441	498	104	217	17.3903	3.93638	5.72912	-2.14334	-1.60189	+	gt-ag
T19C3.5	III	625944	626384	200	23	165	6.98404	0.870546	4.35625	-3.00407	-0.680976	-	NN-NN
F23H11.2	III	897171	897407	140	39	27	4.88883	1.47614	0.71284	-1.72765	-2.77784	+	gt-ag
T12B5.9,fbxa-59	III	941322	943346	110	90	504	3.84122	3.40649	13.3064	-0.173281	1.79248	-	NN-NN
uaf-1	III	1068251	1070423	265	168	229	9.25385	6.35877	6.04594	-0.541305	-0.614087	-	NN-NN
fbxa-61	III	1239411	1241158	38	54	38	1.32697	2.04389	1.00326	0.623186	-0.403442	+	gt-ag
Y82E9BR.16	III	1421781	1424268	280	502	450	9.77765	19.0006	11.8807	0.958487	0.281056	-	NN-NN
B0524.6	III	1902052	1902663	341	275	367	11.9078	10.4087	9.68935	-0.194114	-0.297434	-	NN-NN
gcn-1	III	2157830	2161721	738	1336	2136	25.7711	50.5674	56.3936	0.972453	1.12978	+	gt-ag
gcn-1	III	2162021	2163254	358	553	938	12.5014	20.931	24.7646	0.743546	0.986186	+	gt-ag
iffb-1	III	2319456	2320923	15	157	127	0.523803	5.94243	3.35299	3.50396	2.67835	+	gt-ag
gip-1	III	2350451	2350807	39	17	45	1.36189	0.643447	1.18807	-1.08171	-0.196991	+	gt-ag
feh-1	III	2556678	2556937	92	222	579	3.21266	8.40266	15.2865	1.38708	2.25042	+	gt-ag
set-27	III	2702207	2703595	220	161	139	7.68244	6.09382	3.66981	-0.334217	-1.06586	+	gt-ag
Y71H2AM.3	III	2805846	2806909	119	128	203	4.1555	4.84478	5.3595	0.221408	0.367076	+	gt-ag
Y71H2AM.2	III	2821932	2823092	74	83	151	2.58409	3.14154	3.98663	0.281812	0.62551	+	gt-ag
T20B6.2	III	2893613	2894093	123	32	10	4.29518	1.21119	0.264015	-1.82629	-4.02403	+	gt-ag
H05C05.1	III	2957171	2957349	239	176	213	8.34592	6.66157	5.62352	-0.325209	-0.569599	+	gt-ag
H05C05.1	III	2957454	2958227	185	11	159	6.46023	0.416348	4.19784	-3.95572	-0.62194	+	gt-ag
H06I04.6	III	3061118	3061813	102	72	69	3.56186	2.72519	1.8217	-0.386274	-0.967343	-	NN-NN
amx-1	III	3824890	3825026	48	17	114	1.67617	0.643447	3.00977	-1.38127	0.844486	+	gt-ag
msi-1	III	3965886	3966367	108	163	124	3.77138	6.16952	3.27378	0.710067	-0.204133	-	NN-NN
rcq-5	III	4041324	4053087	403	288	518	14.0728	10.9008	13.676	-0.368485	-0.0412696	-	NN-NN
rcq-5	III	4041542	4053959	161	199	59	5.62215	7.53212	1.55769	0.421934	-1.85172	-	NN-NN
T08A11.1	III	4262015	4262875	402	466	413	14.0379	17.638	10.9038	0.32936	-0.364496	-	NN-NN
sup-26	III	4279473	4280118	37	97	115	1.29205	3.67143	3.03617	1.50669	1.23259	-	NN-NN
cdk-12	III	4333589	4334120	91	102	195	3.17774	3.86068	5.14829	0.280857	0.696094	+	gt-ag
cdk-12	III	4334323	4336221	244	40	54	8.52053	1.51399	1.42568	-2.49258	-2.57929	+	gt-ag
cisd-3.1	III	4543393	4543771	136	50	19	4.74915	1.89249	0.501628	-1.32738	-3.24298	+	gt-ag
zbp-1	III	4554357	4554566	34	63	107	1.18729	2.38454	2.82496	1.00604	1.25056	+	gt-ag
zbp-1	III	4556511	4556847	376	450	326	13.13	17.0324	8.60689	0.375418	-0.609303	+	gt-ag
ppm-2	III	4652770	4652947	338	21	403	11.803	0.794847	10.6398	-3.89234	-0.149685	+	gt-ag
him-18	III	4713104	4713191	75	130	23	2.61901	4.92048	0.607234	0.909775	-2.1087	-	NN-NN
set-2	III	4928577	4928673	10	26	37	0.349202	0.984096	0.976855	1.49474	1.48408	-	NN-NN
C45G9.12	III	5070531	5070941	117	192	115	4.08566	7.26717	3.03617	0.830824	-0.428317	-	NN-NN
cid-1	III	5175469	5175623	53	62	86	1.85077	2.34669	2.27053	0.342502	0.294902	+	gt-ag
daf-4	III	5625282	5625420	43	117	54	1.50157	4.42843	1.42568	1.56033	-0.0748191	+	gt-ag
dpff-1	III	5905912	5906033	23	61	39	0.803164	2.30884	1.02966	1.5234	0.358398	-	NN-NN
mvk-1	III	6128384	6129342	171	72	525	5.97135	2.72519	13.8608	-1.1317	1.21488	-	NN-NN
F42A10.9	III	6170792	6170900	1570	776	1337	54.8247	29.3715	35.2988	-0.90041	-0.635207	+	gt-ag
esyt-2	III	6226255	6226842	63	175	213	2.19997	6.62372	5.62352	1.59016	1.35399	-	NN-NN
esyt-2	III	6226567	6226842	48	219	185	1.67617	8.28912	4.88428	2.30605	1.54298	-	NN-NN
dig-1	III	6774107	6777921	33	174	252	1.15237	6.58587	6.65318	2.51478	2.52944	+	gt-ag
dig-1	III	6774107	6781860	33	130	244	1.15237	4.92048	6.44196	2.0942	2.4829	+	gt-ag
prk-1	III	6997896	6997999	28	277	203	0.977765	10.4844	5.3595	3.42261	2.45454	+	gt-ag
cyk-1	III	7028108	7028487	11	48	113	0.384122	1.81679	2.98337	2.24176	2.95731	-	NN-NN
mup-4	III	7481334	7481488	81	100	70	2.82854	3.78498	1.8481	0.420232	-0.614009	-	NN-NN
mup-4	III	7483063	7483374	53	185	314	1.85077	7.00222	8.29007	1.91969	2.16326	-	NN-NN
fbn-1	III	7636473	7636603	269	85	330	9.39353	3.21724	8.71249	-1.54585	-0.108582	+	gt-ag
gly-3	III	7915147	7915916	90	28	40	3.14282	1.0598	1.05606	-1.56827	-1.57337	-	NN-NN
cit-1.2	III	8013021	8013120	171	139	137	5.97135	5.26113	3.617	-0.182685	-0.723262	+	gt-ag
lin-36	III	8019850	8019958	102	84	139	3.56186	3.17939	3.66981	-0.163882	0.0430739	-	NN-NN
mdt-30	III	8027522	8027857	152	127	39	5.30787	4.80693	1.02966	-0.143017	-2.36597	-	NN-NN
henn-1	III	8233338	8233417	115	226	331	4.01582	8.55406	8.73889	1.09091	1.12176	+	gt-ag
ZC262.10,ZC262.12,ZC262.7,unc-116	III	8343616	8352055	3578	3921	4599	124.944	148.409	121.42	0.248294	-0.041275	-	NN-NN
rfp-1	III	8359884	8359970	124	144	285	4.3301	5.45038	7.52443	0.331955	0.79718	+	gt-ag
F42H10.3	III	8485223	8486337	173	10	151	6.04119	0.378498	3.98663	-3.99647	-0.599665	+	gt-ag
pac-1	III	8496245	8497048	34	33	32	1.18729	1.24904	0.844848	0.0731572	-0.490905	+	gt-ag
lin-9	III	8898465	8903659	225	50	359	7.85704	1.89249	9.47814	-2.0537	0.270617	-	NN-NN
lin-9	III	8898471	8903659	70	49	14	2.44441	1.85464	0.369621	-0.398347	-2.72537	-	NN-NN
rgr-1	III	9400335	9403075	16	137	56	0.558723	5.18543	1.47848	3.21426	1.40391	+	gt-ag
panl-3	III	9819946	9820160	140	16	52	4.88883	0.605597	1.37288	-3.01306	-1.83229	+	gt-ag
ttr-3	III	9916656	9926522	46	22	65	1.60633	0.832697	1.7161	-0.947904	0.095364	-	NN-NN
ymel-1	III	10418307	10418819	136	118	322	4.74915	4.46628	8.50128	-0.0885938	0.840012	+	gt-ag
tat-3	III	10722581	10722978	104	146	162	3.6317	5.52608	4.27704	0.605611	0.235968	-	NN-NN
rle-1	III	10943089	10945705	11	20	66	0.384122	0.756997	1.7425	0.978722	2.18152	+	gt-ag
spat-2	III	11056276	11057278	58	33	30	2.02537	1.24904	0.792045	-0.697361	-1.35453	+	gt-ag
arx-3	III	12053506	12053586	143	37	213	4.99359	1.40044	5.62352	-1.83419	0.171396	-	NN-NN
Y75B8A.6	III	12125192	12125556	1188	940	1189	41.4852	35.5789	31.3914	-0.221576	-0.402228	-	NN-NN
ani-1	III	12448025	12448105	46	68	23	1.60633	2.57379	0.607234	0.680127	-1.40344	-	NN-NN
dhhc-8	III	13116644	13118654	379	436	628	13.2348	16.5025	16.5801	0.318356	0.325125	+	gt-ag
mdt-29,pot-3	III	13775347	13782580	566	398	722	19.7648	15.0642	19.0619	-0.391808	-0.0522451	+	gt-ag
3R5.2,mdt-29,pot-3	III	13777726	13783354	20	107	120	0.698404	4.04993	3.16818	2.53576	2.18152	+	gt-ag
frm-5.2	IV	1065	1285	536	544	738	18.7172	20.5903	19.4843	0.1376	0.057946	+	gt-ag
frm-5.2	IV	6703	6994	68	11	112	2.37457	0.416348	2.95697	-2.51181	0.31645	+	gt-ag
frm-5.1	IV	46600	46814	112	91	149	3.91106	3.44434	3.93382	-0.183334	0.00837175	-	NN-NN
csn-3	IV	194966	196846	107	36	34	3.73646	1.36259	0.897651	-1.45532	-2.05745	+	gt-ag
Y55F3BR.7	IV	838489	841809	194	361	195	6.77452	13.6638	5.14829	1.01217	-0.396024	-	NN-NN
csn-4	IV	1081460	1082736	70	116	148	2.44441	4.39058	3.90742	0.844924	0.676729	-	NN-NN
Y104H12D.3	IV	1198209	1198915	90	90	317	3.14282	3.40649	8.36927	0.116226	1.41304	+	gt-ag
egrh-3	IV	2680447	2683009	15	41	118	0.523803	1.55184	3.11538	1.56689	2.57231	-	NN-NN
Y54G2A.26	IV	2986734	2987602	17	24	43	0.593643	0.908396	1.13526	0.613726	0.93536	-	NN-NN
T23E1.1	IV	3155190	3155483	22	29	13	0.768244	1.09765	0.343219	0.514775	-1.16243	+	gt-ag
clec-67	IV	3924342	3925961	28	48	47	0.977765	1.81679	1.24087	0.893834	0.343792	+	gt-ag
dpy-13	IV	4236424	4236538	822	139	1045	28.7044	5.26113	27.5896	-2.44783	-0.0571492	+	gt-ag
R08C7.12	IV	4451665	4451772	55	25	31	1.92061	0.946246	0.818446	-1.02128	-1.23061	+	gt-ag
ttbk-2	IV	5259783	5261202	508	160	196	17.7395	6.05597	5.17469	-1.55053	-1.77742	+	gt-ag
F41H10.3,Y4C6B.2,Y4C6B.5,ZK616.61,mgl-3,ttbk-2	IV	5259783	5453826	612	63	53	21.3712	2.38454	1.39928	-3.16388	-3.93291	+	gt-ag
plc-4	IV	7512065	7512219	12	24	99	0.419042	0.908396	2.61375	1.11623	2.64095	-	NN-NN
exc-9	IV	7940017	7940273	71	44	60	2.47933	1.66539	1.58409	-0.57409	-0.646298	-	NN-NN
pmk-3	IV	8139302	8140364	158	135	13	5.51739	5.10973	0.343219	-0.110739	-4.00678	+	gt-ag
M116.5	IV	8393043	8418963	184	182	258	6.42531	6.88867	6.81158	0.100459	0.0842235	-	NN-NN
parg-1	IV	8746822	8747323	96	54	77	3.35234	2.04389	2.03291	-0.713849	-0.721618	+	gt-ag
egl-20	IV	9813087	9813182	17	15	32	0.593643	0.567748	0.844848	-0.0643463	0.509095	-	NN-NN
Y43C5A.2	IV	10269941	10270455	64	76	21	2.23489	2.87659	0.554431	0.364153	-2.01112	+	gt-ag
B0513.2	IV	13883711	13883947	76	168	254	2.65393	6.35877	6.70598	1.26062	1.33732	+	gt-ag
egl-8	V	35156	35539	38	73	83	1.32697	2.76304	2.19132	1.05812	0.72367	+	gt-ag
fbxa-72	V	676501	676576	131	119	244	4.57454	4.50413	6.44196	-0.0223793	0.493872	-	NN-NN
F41B5.1	V	2255604	2256449	26	11	35	0.907925	0.416348	0.924052	-1.12478	0.0254014	+	gt-ag
chpf-2	V	3038724	3039267	12	33	49	0.419042	1.24904	1.29367	1.57566	1.62631	-	NN-NN
R08F11.1	V	3780348	3780563	345	208	215	12.0475	7.87277	5.67632	-0.613787	-1.0857	-	NN-NN
H43I07.1	V	4206743	4208985	120	277	441	4.19042	10.4844	11.6431	1.32308	1.4743	+	gt-ag
sut-2	V	4562942	4564367	57	96	115	1.99045	3.63358	3.03617	0.868298	0.609158	-	NN-NN
Y49G5B.1	V	5227162	5228145	25	35	10	0.873005	1.32474	0.264015	0.601653	-1.72537	+	gt-ag
CD4.1	V	5606685	5606794	37	13	11	1.29205	0.492048	0.290416	-1.39279	-2.15346	+	gt-ag
F25B4.5	V	5682011	5682208	110	114	139	3.84122	4.31488	3.66981	0.167756	-0.0658605	-	NN-NN
alh-4	V	6427955	6428046	410	53	189	14.3173	2.00604	4.98988	-2.83533	-1.52068	-	NN-NN
F40A3.2	V	7881143	7881227	195	79	91	6.80944	2.99014	2.40254	-1.18732	-1.50298	+	gt-ag
lmtr-2	V	8010826	8010923	43	18	47	1.50157	0.681297	1.24087	-1.14011	-0.275118	-	NN-NN
Y97E10AR.6	V	8012745	8012850	89	121	146	3.1079	4.57983	3.85462	0.559356	0.310649	-	NN-NN
asp-5	V	8272960	8273197	23	44	25	0.803164	1.66539	0.660037	1.0521	-0.283148	+	gt-ag
lmd-3	V	8429369	8429809	149	11	39	5.20311	0.416348	1.02966	-3.64351	-2.33721	-	NN-NN
F41E6.8	V	8601095	8601334	93	75	47	3.24758	2.83874	1.24087	-0.194114	-1.38801	-	NN-NN
grd-6	V	9221983	9222151	23	122	340	0.803164	4.61768	8.97651	2.5234	3.48239	+	gt-ag
grd-6	V	9223215	9223485	34	83	594	1.18729	3.14154	15.6825	1.4038	3.72341	+	gt-ag
tos-1	V	9343796	9343946	2020	1636	2222	70.5388	61.9223	58.6641	-0.187957	-0.265938	-	NN-NN
R04B5.11	V	10091046	10091163	28	17	18	0.977765	0.643447	0.475227	-0.603666	-1.04087	-	NN-NN
F32D8.7	V	10899957	10900078	29	15	13	1.01269	0.567748	0.343219	-0.834864	-1.56098	+	gt-ag
C55A6.10	V	11506385	11506871	38	35	102	1.32697	1.32474	2.69295	-0.00241853	1.02106	+	gt-ag
pms-2	V	11572063	11572776	85	46	169	2.96822	1.74109	4.46185	-0.769603	0.588047	-	NN-NN
ceh-27	V	11664347	11664540	45	39	111	1.57141	1.47614	2.93057	-0.0902249	0.899121	-	NN-NN
sma-1	V	11914580	11914758	24	20	112	0.838084	0.756997	2.95697	-0.146808	1.81895	+	gt-ag
pqn-53	V	12063678	12063822	11	52	21	0.384122	1.96819	0.554431	2.35723	0.529444	-	NN-NN
C27A7.1	V	12133678	12134118	23	13	71	0.803164	0.492048	1.87451	-0.706896	1.22274	+	gt-ag
F28C1.3	V	12468901	12469139	20	71	23	0.698404	2.68734	0.607234	1.94404	-0.201808	+	gt-ag
W04D2.6	V	12499593	12499732	20	86	100	0.698404	3.25509	2.64015	2.22056	1.91849	+	gt-ag
lpin-1	V	13652540	13652642	74	32	21	2.58409	1.21119	0.554431	-1.09323	-2.22058	-	NN-NN
C53A5.6	V	14544405	14544497	44	18	33	1.53649	0.681297	0.871249	-1.17328	-0.818479	-	NN-NN
nhr-50	V	15999660	16000470	82	192	222	2.86346	7.26717	5.86113	1.34364	1.03342	-	NN-NN
Y59A8B.8	V	18055445	18065097	510	370	604	17.8093	14.0044	15.9465	-0.346746	-0.159391	-	NN-NN
M04C3.1	V	19444742	19444851	263	38	683	9.18401	1.43829	18.0322	-2.67477	0.973381	-	NN-NN
F26F2.7	V	20581643	20582074	68	27	22	2.37457	1.02195	0.580833	-1.21635	-2.03147	+	gt-ag
Y73B3A.7	X	137498	137839	17	48	24	0.593643	1.81679	0.633636	1.61373	0.0940578	-	NN-NN
ZK1193.3	X	418278	418445	425	278	421	14.8411	10.5223	11.115	-0.496152	-0.417084	-	NN-NN
dve-1	X	427990	428540	36	164	105	1.25713	6.20737	2.77216	2.30385	1.14088	-	NN-NN
abu-12	X	453032	453977	76	92	175	2.65393	3.48219	4.62026	0.39186	0.799842	-	NN-NN
nas-15	X	779844	780002	47	131	134	1.64125	4.95833	3.5378	1.59506	1.10806	+	gt-ag
F19G12.10	X	1421054	1421809	13	106	177	0.453962	4.01208	4.67306	3.14371	3.36372	+	gt-ag
W05H7.2	X	1435357	1435481	64	67	51	2.23489	2.53594	1.34648	0.182315	-0.731017	+	gt-ag
F49H12.5	X	2075223	2075502	352	122	152	12.2919	4.61768	4.01303	-1.41247	-1.61495	+	gt-ag
F52H2.6	X	2562249	2562514	827	653	931	28.879	24.7159	24.5798	-0.224578	-0.232548	-	NN-NN
klp-4	X	3177264	3177545	71	99	224	2.47933	3.74713	5.91393	0.595835	1.25417	-	NN-NN
abu-10	X	3799021	3799252	21	79	130	0.733324	2.99014	3.43219	2.02769	2.22661	+	gt-ag
nhr-45	X	4659764	4659921	12	115	169	0.419042	4.35273	4.46185	3.37675	3.41248	-	NN-NN
add-1	X	4857531	4857801	46	119	13	1.60633	4.50413	0.343219	1.48748	-2.22656	-	NN-NN
glt-4	X	6406340	6406430	146	36	115	5.09835	1.36259	3.03617	-1.90367	-0.747776	+	gt-ag
inx-1	X	6945000	6945872	27	60	88	0.942845	2.27099	2.32333	1.26823	1.3011	-	NN-NN
flp-26	X	7029249	7029324	21	43	50	0.733324	1.62754	1.32007	1.15017	0.848097	+	gt-ag
C36B7.8	X	7126865	7132152	43	49	220	1.50157	1.85464	5.80833	0.304671	1.95165	+	gt-ag
lron-7	X	7292476	7292561	131	147	122	4.57454	5.56393	3.22098	0.282475	-0.506128	+	gt-ag
unc-98	X	7572616	7572925	44	30	202	1.53649	1.1355	5.3331	-0.436315	1.79534	-	NN-NN
K09F5.6	X	7724118	7724247	156	98	72	5.44755	3.70928	1.90091	-0.554466	-1.51892	+	gt-ag
deg-1	X	7766000	7766087	25	105	201	0.873005	3.97423	5.3067	2.18662	2.60375	+	gt-ag
K01A12.2	X	8618924	8619171	15	13	11	0.523803	0.492048	0.290416	-0.0902249	-0.850901	+	gt-ag
tmc-2	X	9308537	9308660	186	220	302	6.49515	8.32697	7.97325	0.358427	0.295804	+	gt-ag
ZK899.1	X	9447412	9447579	82	146	33	2.86346	5.52608	0.871249	0.948499	-1.7166	+	gt-ag
him-4	X	9725744	9726026	29	38	27	1.01269	1.43829	0.71284	0.506172	-0.506535	+	gt-ag
him-4	X	9751539	9751749	117	61	82	4.08566	2.30884	2.16492	-0.823401	-0.916255	+	gt-ag
ZC506.1	X	9961357	9961965	180	198	353	6.28563	7.49427	9.31973	0.253729	0.568229	+	gt-ag
grk-1	X	9993221	9993631	190	59	130	6.63484	2.23314	3.43219	-1.57099	-0.95093	-	NN-NN
ZC374.2	X	10036996	10037367	48	62	267	1.67617	2.34669	7.0492	0.48546	2.07229	-	NN-NN
ftt-2	X	11604440	11604908	232	340	163	8.10148	12.8689	4.30344	0.667636	-0.912695	-	NN-NN
Y62H9A.13	X	11919647	11920444	29	37	128	1.01269	1.40044	3.37939	0.467698	1.73858	+	gt-ag
sams-1	X	11967406	11967578	24	51	92	0.838084	1.93034	2.42894	1.20369	1.53516	+	gt-ag
scd-1	X	12506966	12507071	80	71	32	2.79361	2.68734	0.844848	-0.055955	-1.72537	-	NN-NN
adt-1	X	12681394	12681507	113	210	437	3.94598	7.94847	11.5375	1.01029	1.54787	+	gt-ag
F55F3.4	X	13786700	13786990	127	12	58	4.43486	0.454198	1.53129	-3.2875	-1.53415	+	gt-ag
elt-3	X	13938868	13939323	207	756	652	7.22848	28.6145	17.2138	1.98498	1.2518	+	gt-ag
K06G5.1	X	14215013	14215377	47	104	330	1.64125	3.93638	8.71249	1.26208	2.40829	+	gt-ag
prx-1	X	14326318	14327119	25	11	16	0.873005	0.416348	0.422424	-1.0682	-1.0473	+	gt-ag
C27C12.4	X	14855082	14855567	186	202	98	6.49515	7.64567	2.58735	0.235279	-1.32789	+	gt-ag
gcy-11	X	17049993	17050082	47	26	43	1.64125	0.984096	1.13526	-0.737923	-0.531766	-	NN-NN
F10D7.3	X	17371701	17373557	66	46	76	2.30473	1.74109	2.00651	-0.404606	-0.199908	-	NN-NN
F31A3.5	X	17558445	17559067	10	20	89	0.349202	0.756997	2.34973	1.11623	2.75036	-	NN-NN

## Sheet: A
Gene	Chromosome	Start	End	Splice junction score wt	Splice junction score alg-1	Splice junction score alg-2	Normalized wt	Normalized alg-1	Normalized alg-2	log2 fold change alg-1/wt	log5 fold change alg-2/wt	Strand	Splice site
Y48G1A.7	I	317606	318001	92	204	258	3.21266	7.72137	6.81158	1.26509	1.08422	-	NN-NN
acs-13	I	515236	519735	46	17	73	1.60633	0.643447	1.92731	-1.31987	0.262821	-	NN-NN
pde-6	I	881201	881279	165	109	401	5.76183	4.12563	10.587	-0.481912	0.877694	-	NN-NN
Y95B8A.2,nas-30	I	941361	943666	81	441	754	2.82854	16.6918	19.9067	2.56101	2.81513	+	gt-ag
mrpl-38	I	1020034	1023531	24	16	83	0.838084	0.605597	2.19132	-0.468737	1.38664	-	NN-NN
R06A10.1	I	1077542	1085989	271	65	53	9.46337	2.46024	1.39928	-1.94356	-2.75767	+	gt-ag
Y48G8AL.5	I	1194159	1195743	321	125	331	11.2094	4.73123	8.73889	-1.24442	-0.359184	+	gt-ag
Y71G12B.13	I	1702475	1702572	514	341	597	17.949	12.9068	15.7617	-0.475771	-0.187479	+	gt-ag
parp-1	I	2924713	2925418	53	30	15	1.85077	1.1355	0.396022	-0.704804	-2.22447	-	NN-NN
Y54E10A.11	I	3190770	3191957	203	230	252	7.0888	8.70546	6.65318	0.29638	-0.0914978	-	NN-NN
W05F2.4	I	3395956	3396702	78	74	437	2.72377	2.80089	11.5375	0.0402771	2.08265	-	NN-NN
smp-2	I	3667325	3667726	298	108	199	10.4062	4.08778	5.2539	-1.34806	-0.985986	-	NN-NN
smp-2	I	3667325	3667722	23	17	32	0.803164	0.643447	0.844848	-0.319873	0.0729962	-	NN-NN
uba-5	I	3873556	3874365	154	56	130	5.37771	2.11959	3.43219	-1.34321	-0.647861	+	gt-ag
unc-73	I	4016971	4017324	194	148	88	6.77452	5.60178	2.32333	-0.274234	-1.54392	-	NN-NN
unc-89	I	4047214	4047965	519	390	660	18.1236	14.7614	17.425	-0.296034	-0.0567104	+	gt-ag
inx-16	I	4164410	4164709	192	49	208	6.70468	1.85464	5.49151	-1.85403	-0.287965	+	gt-ag
met-1	I	4254409	4255395	16	150	65	0.558723	5.67748	1.7161	3.34504	1.61893	+	gt-ag
anc-1	I	4318066	4321662	437	738	533	15.2601	27.9332	14.072	0.872214	-0.11694	+	gt-ag
eri-6	I	4462721	4463457	64	13	46	2.23489	0.492048	1.21447	-2.18333	-0.87988	+	gt-ag
eri-6	I	4468199	4469142	86	32	62	3.00314	1.21119	1.63689	-1.31004	-0.87551	+	gt-ag
D1007.15	I	4557776	4558188	45	13	37	1.57141	0.492048	0.976855	-1.67519	-0.685842	+	gt-ag
C44E4.1	I	4630175	4631247	86	229	192	3.00314	8.66761	5.06909	1.52917	0.755256	-	NN-NN
M04F3.4	I	4771489	4771621	549	269	310	19.1712	10.1816	8.18446	-0.912974	-1.22798	-	NN-NN
M04F3.5	I	4777717	4788306	29	53	75	1.01269	2.00604	1.98011	0.986165	0.967396	-	NN-NN
F57C9.4,glo-2	I	4835551	4836187	25	54	36	0.873005	2.04389	0.950454	1.22726	0.122627	+	gt-ag
fhod-1	I	5068829	5069701	163	28	49	5.69199	1.0598	1.29367	-2.42515	-2.13746	-	NN-NN
C32E12.4	I	5238864	5239004	55	14	122	1.92061	0.529898	3.22098	-1.85778	0.745936	-	NN-NN
C32E12.4	I	5241914	5242464	80	162	119	2.79361	6.13167	3.14178	1.13415	0.169448	-	NN-NN
let-526	I	5306447	5306518	107	42	70	3.73646	1.58969	1.8481	-1.23292	-1.01563	-	NN-NN
ppk-1	I	5364120	5364671	175	82	209	6.11103	3.10369	5.51791	-0.977433	-0.147294	+	gt-ag
frm-4	I	5403965	5404236	87	123	93	3.03806	4.65553	2.45534	0.615797	-0.307227	-	NN-NN
frm-4	I	5403965	5404257	363	255	313	12.676	9.65171	8.26367	-0.393246	-0.617249	-	NN-NN
F59A3.4	I	5508086	5508465	115	21	87	4.01582	0.794847	2.29693	-2.33695	-0.805988	-	NN-NN
F46F11.1	I	5628928	5629908	63	95	100	2.19997	3.59573	2.64015	0.708802	0.263134	+	gt-ag
unc-40	I	5681447	5681876	73	30	36	2.54917	1.1355	0.950454	-1.16671	-1.42334	-	NN-NN
rpt-5	I	5743571	5743717	23	39	35	0.803164	1.47614	0.924052	0.878066	0.202279	-	NN-NN
ccpp-1	I	5757358	5758800	46	30	81	1.60633	1.1355	2.13852	-0.500445	0.412846	-	NN-NN
mtk-1	I	5801299	5803689	835	986	1135	29.1584	37.3199	29.9657	0.356037	0.0394023	-	NN-NN
vpr-1	I	5869954	5874157	48	25	72	1.67617	0.946246	1.90091	-0.82488	0.181521	-	NN-NN
ZK484.4	I	6071480	6071725	190	387	180	6.63484	14.6479	4.75227	1.14256	-0.481444	-	NN-NN
C48E7.6	I	6244928	6245148	15	65	151	0.523803	2.46024	3.98663	2.2317	2.92807	+	gt-ag
bli-4	I	6341360	6342231	35	10	57	1.22221	0.378498	1.50489	-1.69113	0.300165	+	gt-ag
ZC328.3	I	6411628	6412168	248	232	505	8.66021	8.78116	13.3328	0.0200107	0.622501	-	NN-NN
mdt-18	I	6493847	6494273	104	13	26	3.6317	0.492048	0.686439	-2.88377	-2.40344	-	NN-NN
ZC581.9	I	6670141	6673573	64	172	129	2.23489	6.51017	3.40579	1.54249	0.607785	-	NN-NN
ZC581.9	I	6670141	6673682	11	16	59	0.384122	0.605597	1.55769	0.656794	2.01977	-	NN-NN
kin-14	I	7077146	7078024	124	104	67	4.3301	3.93638	1.7689	-0.137531	-1.29155	-	NN-NN
hpo-11	I	7143369	7144562	67	89	207	2.33965	3.36864	5.46511	0.52587	1.22396	-	NN-NN
wago-1	I	7233515	7235384	308	44	141	10.7554	1.66539	3.72261	-2.69113	-1.53068	+	gt-ag
glb-18	I	7333135	7339204	33	16	24	1.15237	0.605597	0.633636	-0.928168	-0.862873	+	gt-ag
F52A8.6	I	7349023	7349161	23	158	123	0.803164	5.98027	3.24738	2.89644	2.01551	+	gt-ag
VH15N14R.1	I	7781655	7782347	26	13	27	0.907925	0.492048	0.71284	-0.883774	-0.348994	-	NN-NN
glna-3	I	7829934	7832380	303	45	39	10.5808	1.70324	1.02966	-2.63509	-3.36121	-	NN-NN
rskn-2	I	8017231	8017784	388	408	411	13.549	15.4427	10.851	0.188738	-0.32036	+	gt-ag
abts-1	I	8304381	8304479	95	36	70	3.31742	1.36259	1.8481	-1.2837	-0.844014	-	NN-NN
K02B12.5	I	8523186	8523448	120	18	100	4.19042	0.681297	2.64015	-2.62074	-0.666476	-	NN-NN
cle-1	I	8707559	8708085	96	18	114	3.35234	0.681297	3.00977	-2.29881	-0.155514	-	NN-NN
gei-17	I	9106060	9106516	18	35	31	0.628563	1.32474	0.818446	1.07558	0.380829	-	NN-NN
lim-9	I	9185066	9188826	59	58	118	2.06029	2.19529	3.11538	0.0915639	0.596558	-	NN-NN
uev-3	I	9310389	9310754	665	556	260	23.2219	21.0445	6.86439	-0.142043	-1.75828	+	gt-ag
irx-1	I	9537198	9538192	19	41	69	0.663484	1.55184	1.8217	1.22585	1.45716	-	NN-NN
lsl-1	I	9901806	9902001	13	92	17	0.453962	3.48219	0.448825	2.93935	-0.0164187	+	gt-ag
scpl-1	I	10091532	10092712	21	81	154	0.733324	3.06584	4.06583	2.06376	2.47103	-	NN-NN
pab-1	I	10435238	10436095	395	79	55	13.7935	2.99014	1.45208	-2.2057	-3.24779	-	NN-NN
B0511.2	I	10651588	10652343	145	113	175	5.06343	4.27703	4.62026	-0.243504	-0.13214	+	gt-ag
C34B2.11,tag-272	I	10690766	10693630	27	49	123	0.942845	1.85464	3.24738	0.976048	1.78419	+	gt-ag
C34B2.11	I	10692298	10693630	163	109	229	5.69199	4.12563	6.04594	-0.464318	0.0870338	+	gt-ag
C34B2.11	I	10693751	10696217	87	22	81	3.03806	0.832697	2.13852	-1.86729	-0.506535	+	gt-ag
gpx-8	I	10782478	10783026	30	37	54	1.04761	1.40044	1.42568	0.418789	0.444555	-	NN-NN
Y52B11A.3	I	10976584	10977650	241	150	419	8.41577	5.67748	11.0622	-0.567845	0.394475	+	gt-ag
F35E2.10	I	11721685	11722062	29	28	28	1.01269	1.0598	0.739242	0.0655999	-0.454068	-	NN-NN
vab-10	I	11780633	11787846	59	28	11	2.06029	1.0598	0.290416	-0.959062	-2.82665	-	NN-NN
vab-10	I	11789242	11797049	34	200	298	1.18729	7.56997	7.86764	2.67262	2.72826	-	NN-NN
vab-10	I	11789242	11800624	200	273	391	6.98404	10.333	10.323	0.565127	0.563727	-	NN-NN
R06C1.4	I	11931173	11931334	742	1077	1251	25.9108	40.7643	33.0283	0.653753	0.350149	+	gt-ag
hsf-1	I	11961984	11962936	21	228	271	0.733324	8.62976	7.1548	3.5568	3.28639	-	NN-NN
F58D5.8	I	12031682	12032082	114	129	65	3.9809	4.88263	1.7161	0.294563	-1.21396	-	NN-NN
C15C6.3	I	12209544	12210230	462	299	500	16.1331	11.3171	13.2007	-0.511521	-0.289407	+	gt-ag
T27F6.6	I	12490762	12490976	24	63	18	0.838084	2.38454	0.475227	1.50854	-0.818479	+	gt-ag
gale-1	I	12970272	12975185	86	95	114	3.00314	3.59573	3.00977	0.259817	0.00318341	+	gt-ag
W05B5.1	I	13036914	13042976	29	13	138	1.01269	0.492048	3.64341	-1.04132	1.8471	+	gt-ag
Y6B3B.5	I	13753763	13754307	130	36	40	4.53962	1.36259	1.05606	-1.73622	-2.10388	-	NN-NN
Y37H9A.3	I	13786082	13786936	194	314	226	6.77452	11.8849	5.96674	0.810934	-0.183176	+	gt-ag
F49B2.6	I	14331121	14331677	47	241	170	1.64125	9.12181	4.48825	2.47453	1.45136	+	gt-ag
ero-1	I	14663047	14665404	16	13	15	0.558723	0.492048	0.396022	-0.183334	-0.496551	+	gt-ag
Y54E5A.2	I	14689857	14694315	27	14	22	0.942845	0.529898	0.580833	-0.831307	-0.698898	+	gt-ag
kin-1	I	14951069	14951442	50	76	21	1.74601	2.87659	0.554431	0.720297	-1.65498	+	gc-ag
sptl-1	II	51136	51652	31	57	152	1.08253	2.15744	4.01303	0.99492	1.89029	+	gt-ag
K01A2.5	II	301388	302405	38	71	64	1.32697	2.68734	1.6897	1.01805	0.348631	+	gt-ag
W10D9.3	II	458946	459017	19	120	136	0.663484	4.54198	3.5906	2.77519	2.43609	-	NN-NN
F53A10.2	II	1201815	1211077	89	164	112	3.1079	6.20737	2.95697	0.998045	-0.0718204	+	gt-ag
lin-42	II	1236389	1237824	229	203	110	7.99672	7.68352	2.90416	-0.0576419	-1.46129	-	NN-NN
nol-6	II	1433382	1434681	107	210	269	3.73646	7.94847	7.102	1.089	0.926554	-	NN-NN
math-26	II	1771993	1772147	10	93	12	0.349202	3.52004	0.316818	3.33346	-0.140407	+	gt-ag
math-41	II	1827275	1828929	89	118	212	3.1079	4.46628	5.59712	0.523136	0.848745	+	gt-ag
C33C12.10,Y59C2A.2	II	2194114	2199296	66	67	72	2.30473	2.53594	1.90091	0.137921	-0.277911	-	NN-NN
cct-3	II	2239359	2240360	954	977	2328	33.3139	36.9793	61.4627	0.150595	0.883588	+	gt-ag
tsr-1	II	2464395	2465258	68	159	111	2.37457	6.01812	2.93057	1.34165	0.303511	-	NN-NN
tsr-1	II	2465447	2465639	216	323	225	7.54276	12.2255	5.94034	0.696729	-0.344548	-	NN-NN
sqv-2,ubc-15,ubc-26	II	2891526	2906722	61	14	38	2.13013	0.529898	1.00326	-2.00716	-1.08625	-	NN-NN
Y25C1A.7	II	3064514	3065291	378	302	476	13.1998	11.4307	12.5671	-0.207612	-0.0708665	-	NN-NN
C16C8.18	II	3429783	3430163	472	159	73	16.4823	6.01812	1.92731	-1.45353	-3.09626	+	gt-ag
wago-11	II	3605005	3605124	38	22	17	1.32697	0.832697	0.448825	-0.67227	-1.56391	+	gt-ag
F53C3.13	II	3922063	3922959	47	11	15	1.64125	0.416348	0.396022	-1.97893	-2.05114	-	NN-NN
lat-2	II	4362474	4362772	50	129	309	1.74601	4.88263	8.15806	1.4836	2.22416	+	gt-ag
pqn-35	II	4613275	4623825	15	28	42	0.523803	1.0598	1.10886	1.01669	1.08198	+	gt-ag
che-10	II	4634577	4635281	70	41	114	2.44441	1.55184	3.00977	-0.655505	0.300165	-	NN-NN
F10G7.10	II	4723037	4723281	613	163	339	21.4061	6.16952	8.95011	-1.79479	-1.25804	-	NN-NN
C33F10.1	II	4833322	4835138	226	52	16	7.89196	1.96819	0.422424	-2.00351	-4.22362	+	gt-ag
zyg-12	II	4948576	4949902	72	44	28	2.51425	1.66539	0.739242	-0.594267	-1.76601	+	gt-ag
C17G10.3	II	5584267	5584351	50	74	80	1.74601	2.80089	2.11212	0.681823	0.27463	+	gt-ag
F10C1.3	II	5757135	5757712	273	236	74	9.53321	8.93256	1.95371	-0.0938881	-2.28675	-	NN-NN
K05F1.6	II	5783929	5784061	51	104	124	1.78093	3.93638	3.27378	1.14424	0.878329	+	gt-ag
F55C12.5	II	5870710	5872385	74	46	17	2.58409	1.74109	0.448825	-0.569665	-2.52543	-	NN-NN
rfip-1	II	5891779	5891863	1083	1254	1213	37.8186	47.4637	32.025	0.32773	-0.239896	+	gt-ag
egl-44	II	5928871	5936441	132	71	178	4.60946	2.68734	4.69947	-0.778421	0.0278975	+	gt-ag
R12C12.8	II	6059324	6059597	28	85	18	0.977765	3.21724	0.475227	1.71826	-1.04087	-	NN-NN
abts-3	II	6133637	6137835	44	12	29	1.53649	0.454198	0.765643	-1.75824	-1.00489	+	gt-ag
tat-4	II	6235505	6236743	59	121	75	2.06029	4.57983	1.98011	1.15245	-0.0572662	-	NN-NN
C32D5.10	II	6350357	6350429	15	121	56	0.523803	4.57983	1.47848	3.1282	1.49702	-	NN-NN
tag-184	II	6540153	6546722	313	428	314	10.93	16.1997	8.29007	0.567674	-0.39884	+	gt-ag
vps-32.1	II	6588783	6589708	48	86	26	1.67617	3.25509	0.686439	0.957528	-1.28796	+	gt-ag
vps-32.1	II	6589852	6590130	31	14	40	1.08253	0.529898	1.05606	-1.03062	-0.0357101	+	gt-ag
C18H9.3	II	6685312	6685788	643	767	961	22.4537	29.0308	25.3718	0.370634	0.176276	+	gt-ag
F43E2.6	II	7368310	7368815	96	53	81	3.35234	2.00604	2.13852	-0.740816	-0.648554	-	NN-NN
Y9D1A.1	II	7447918	7448295	13	64	31	0.453962	2.42239	0.818446	2.41579	0.850315	+	gt-ag
D1022.4	II	7456964	7457046	47	27	12	1.64125	1.02195	0.316818	-0.683475	-2.37307	-	NN-NN
D1022.4	II	7457164	7457244	126	65	50	4.39994	2.46024	1.32007	-0.838686	-1.73687	-	NN-NN
cah-2	II	7482541	7485299	18	62	120	0.628563	2.34669	3.16818	1.9005	2.33352	-	NN-NN
R10H1.1	II	7495959	7496036	170	70	157	5.93643	2.64949	4.14503	-1.16388	-0.518212	+	gt-ag
syd-1	II	7586162	7586708	24	40	82	0.838084	1.51399	2.16492	0.853192	1.36915	-	NN-NN
B0495.9	II	7708305	7708379	46	34	46	1.60633	1.28689	1.21447	-0.319873	-0.403442	-	NN-NN
ptc-1	II	7892814	7893229	43	51	21	1.50157	1.93034	0.554431	0.362387	-1.43739	+	gt-ag
T13H5.1	II	8488884	8489392	131	77	13	4.57454	2.91444	0.343219	-0.65041	-3.73643	-	NN-NN
hgap-2	II	8675005	8675112	81	17	31	2.82854	0.643447	0.818446	-2.13616	-1.7891	-	NN-NN
sftd-3	II	8962259	8962671	39	50	25	1.36189	1.89249	0.660037	0.47468	-1.04499	-	NN-NN
F37B12.3	II	9041406	9042700	84	33	30	2.9333	1.24904	0.792045	-1.2317	-1.88887	-	NN-NN
T24B8.4	II	9064274	9065646	118	341	490	4.12058	12.9068	12.9367	1.64721	1.65055	-	NN-NN
T24B8.4	II	9065405	9066467	47	19	35	1.64125	0.719147	0.924052	-1.19044	-0.828748	-	NN-NN
T24H10.5	II	9101275	9103909	185	146	107	6.46023	5.52608	2.82496	-0.225331	-1.19336	+	gt-ag
43617	II	9118580	9120176	185	56	138	6.46023	2.11959	3.64341	-1.6078	-0.826299	+	gt-ag
M176.4	II	9418550	9420480	192	109	204	6.70468	4.12563	5.3859	-0.700552	-0.315979	+	gt-ag
M176.4	II	9420380	9420480	38	17	106	1.32697	0.643447	2.79856	-1.04424	1.07655	+	gt-ag
shk-1	II	9756831	9761951	41	44	127	1.43173	1.66539	3.35299	0.218106	1.22769	+	gt-ag
C05C10.2	II	9922260	9922378	109	80	91	3.8063	3.02799	2.40254	-0.33003	-0.663832	+	gt-ag
C05C10.2	II	9924692	9924798	572	612	675	19.9743	23.1641	17.821	0.213742	-0.164569	+	gt-ag
F27E5.3	II	10143628	10143745	177	150	41	6.18087	5.67748	1.08246	-0.122561	-2.5135	-	NN-NN
T09F3.5	II	10397834	10398123	31	11	205	1.08253	0.416348	5.41231	-1.37854	2.32184	+	gt-ag
C06A1.2	II	10571488	10571821	103	130	151	3.59678	4.92048	3.98663	0.452093	0.148462	+	gt-ag
ptb-1	II	10673880	10677590	56	27	18	1.95553	1.02195	0.475227	-0.936241	-2.04087	+	gt-ag
metr-1	II	10927217	10927363	171	182	263	5.97135	6.88867	6.94359	0.206168	0.217625	+	gt-ag
rsp-1	II	11454921	11455025	118	30	83	4.12058	1.1355	2.19132	-1.85953	-0.911045	+	gt-ag
W02B12.4	II	11456960	11457122	240	249	63	8.38084	9.42461	1.66329	0.169337	-2.33305	-	NN-NN
ldh-1	II	11724249	11725325	68	45	150	2.37457	1.70324	3.96022	-0.479384	0.737914	+	gt-ag
Y17G7B.8	II	12026574	12026909	53	221	24	1.85077	8.36481	0.633636	2.17621	-1.5464	-	NN-NN
Y57A10A.1	II	12136490	12137661	31	202	226	1.08253	7.64567	5.96674	2.82024	2.46254	+	gt-ag
Y57A10A.2	II	12148120	12148484	74	30	30	2.58409	1.1355	0.792045	-1.18634	-1.706	+	gt-ag
Y57A10A.14	II	12186052	12187732	54	23	141	1.88569	0.870546	3.72261	-1.1151	0.981222	+	gt-ag
Y57A10A.14	II	12187066	12187732	56	17	48	1.95553	0.643447	1.26727	-1.60367	-0.625834	+	gt-ag
rgs-4	II	12662897	12669227	437	295	410	15.2601	11.1657	10.8246	-0.450692	-0.495451	+	gt-ag
Y46G5A.43	II	12742878	12742992	114	21	57	3.9809	0.794847	1.50489	-2.32435	-1.40344	-	NN-NN
gcn-2	II	13084678	13084776	40	54	69	1.39681	2.04389	1.8217	0.549185	0.383155	+	gt-ag
mac-1	II	13314891	13316170	36	25	86	1.25713	0.946246	2.27053	-0.409843	0.852898	-	NN-NN
tbc-15	II	13440909	13443208	509	613	694	17.7744	23.202	18.3226	0.384447	0.0438282	-	NN-NN
pqn-27	II	13455102	13459286	97	131	95	3.38726	4.95833	2.50814	0.549736	-0.433499	-	NN-NN
rpoa-1	II	13690607	13691777	23	18	96	0.803164	0.681297	2.53454	-0.237411	1.65796	-	NN-NN
Y51H1A.2	II	13870024	13874131	32	54	35	1.11745	2.04389	0.924052	0.871113	-0.274159	-	NN-NN
xrn-1	II	14085618	14088598	17	32	53	0.593643	1.21119	1.39928	1.02876	1.23702	+	gt-ag
unc-52	II	14652809	14653540	15	19	12	0.523803	0.719147	0.316818	0.457263	-0.72537	-	NN-NN
C09F9.7	II	14713521	14714327	346	490	804	12.0824	18.5464	21.2268	0.618236	0.812982	-	NN-NN
C09F9.7	II	14716739	14717776	40	18	71	1.39681	0.681297	1.87451	-1.03578	0.424377	-	NN-NN
nsun-5	II	14973064	14974485	34	40	29	1.18729	1.51399	0.765643	0.350691	-0.632924	+	gt-ag
cox-17	III	191094	191765	41	49	40	1.43173	1.85464	1.05606	0.373384	-0.439066	+	gt-ag
hpo-29	III	243602	244684	441	568	528	15.3998	21.4987	13.94	0.481338	-0.143683	+	gt-ag
Y50D7A.1	III	312977	313655	55	41	36	1.92061	1.55184	0.950454	-0.307582	-1.01488	+	gt-ag
gei-4	III	348427	354663	205	103	417	7.15864	3.89853	11.0094	-0.876754	0.620982	-	NN-NN
K10F12.6,K10F12.8,gsto-3	III	381298	403487	36	28	18	1.25713	1.0598	0.475227	-0.246344	-1.40344	-	NN-NN
B0353.1	III	556033	565560	18	28	56	0.628563	1.0598	1.47848	0.753656	1.23399	+	gt-ag
T17H7.7	III	755601	755682	51	42	255	1.78093	1.58969	6.73238	-0.163882	1.91849	-	NN-NN
alh-11,dagl-2	III	777005	778675	26	19	10	0.907925	0.719147	0.264015	-0.336286	-1.78195	-	NN-NN
trpp-11	III	796708	797152	298	375	528	10.4062	14.1937	13.94	0.447804	0.421784	+	gt-ag
fbxa-11	III	950965	951195	14	112	118	0.488883	4.23918	3.11538	3.11623	2.67185	+	gt-ag
R06B10.2	III	974723	975841	52	12	32	1.81585	0.454198	0.844848	-1.99925	-1.10388	-	NN-NN
cdh-12	III	1178162	1178914	708	187	454	24.7235	7.07792	11.9863	-1.80449	-1.0445	+	gt-ag
pes-4	III	1222072	1230222	189	230	170	6.59992	8.70546	4.48825	0.399474	-0.556293	-	NN-NN
fbxa-92	III	1262019	1262138	130	29	262	4.53962	1.09765	6.91719	-2.04816	0.607613	-	NN-NN
Y82E9BR.2	III	1439967	1440051	110	86	47	3.84122	3.25509	1.24087	-0.238869	-1.63021	+	gt-ag
Y82E9BR.2	III	1440667	1441583	153	150	54	5.34279	5.67748	1.42568	0.0876568	-1.90594	+	gt-ag
Y82E9BR.2	III	1442137	1443059	61	15	11	2.13013	0.567748	0.290416	-1.90762	-2.87475	+	gt-ag
Y82E9BR.2	III	1442758	1443059	29	36	55	1.01269	1.36259	1.45208	0.42817	0.519937	+	gt-ag
cisd-3.2	III	1541976	1543185	56	27	24	1.95553	1.02195	0.633636	-0.936241	-1.62583	+	gt-ag
pqn-41	III	1919900	1927677	26	57	34	0.907925	2.15744	0.897651	1.24868	-0.0164187	+	gt-ag
moa-1	III	1969675	1970086	48	22	13	1.67617	0.832697	0.343219	-1.0093	-2.28796	-	NN-NN
frl-1	III	2124229	2134475	128	26	134	4.46978	0.984096	3.5378	-2.18333	-0.337353	+	gt-ag
gip-1	III	2350839	2352182	117	22	40	4.08566	0.832697	1.05606	-2.29471	-1.95188	+	gt-ag
E02H9.3	III	2459185	2461911	68	34	150	2.37457	1.28689	3.96022	-0.883774	0.737914	+	gt-ag
feh-1	III	2556999	2557623	78	170	477	2.72377	6.43447	12.5935	1.24021	2.209	+	gt-ag
Y71H2B.8	III	2579980	2580182	198	19	70	6.9142	0.719147	1.8481	-3.2652	-1.90352	+	gt-ag
Y71H2B.5	III	2604417	2609090	97	43	150	3.38726	1.62754	3.96022	-1.05742	0.225464	+	gt-ag
T20B6.3	III	2900286	2901149	38	141	168	1.32697	5.33683	4.43545	2.00785	1.74095	-	NN-NN
R10F2.6	III	2943680	2944545	56	73	39	1.95553	2.76304	1.02966	0.498696	-0.925395	-	NN-NN
H05C05.1	III	2952187	2953663	165	151	240	5.76183	5.71533	6.33636	-0.0116915	0.137127	+	gt-ag
daf-2	III	3028800	3040782	42	16	77	1.46665	0.605597	2.03291	-1.27609	0.471027	-	NN-NN
R148.3	III	3180168	3182968	108	22	36	3.77138	0.832697	0.950454	-2.17923	-1.9884	+	gt-ag
Y53G8AR.8	III	3293807	3293923	21	10	52	0.733324	0.378498	1.37288	-0.954163	0.90468	-	NN-NN
phf-15	III	3325930	3326300	71	119	116	2.47933	4.50413	3.06257	0.861297	0.304792	+	gt-ag
cri-3	III	3396435	3396585	285	180	132	9.95225	6.81297	3.485	-0.546739	-1.51387	+	gt-ag
F59A2.2,golg-4	III	3411596	3416801	711	428	560	24.8283	16.1997	14.7848	-0.616013	-0.747865	+	gt-ag
acy-3	III	3781465	3781832	27	25	15	0.942845	0.946246	0.396022	0.00519466	-1.25144	-	NN-NN
msi-1	III	3967124	3971492	68	12	95	2.37457	0.454198	2.50814	-2.38627	0.0789509	-	NN-NN
msi-1	III	3967124	3967235	20	25	71	0.698404	0.946246	1.87451	0.438154	1.42438	-	NN-NN
unc-79	III	4068505	4069266	176	103	180	6.14595	3.89853	4.75227	-0.656705	-0.37102	+	gt-ag
unc-103	III	4124884	4139286	17	14	20	0.593643	0.529898	0.52803	-0.163882	-0.168977	+	gt-ag
unc-103	III	4145022	4146293	110	65	83	3.84122	2.46024	2.19132	-0.642766	-0.809762	+	gt-ag
hrde-1	III	4176159	4176265	43	17	21	1.50157	0.643447	0.554431	-1.22258	-1.43739	-	NN-NN
dnj-16	III	4190807	4191548	62	44	120	2.16505	1.66539	3.16818	-0.378539	0.549252	+	gt-ag
F26F4.5	III	4889908	4890013	42	56	43	1.46665	2.11959	1.13526	0.531263	-0.369495	-	NN-NN
set-2	III	4928077	4928275	158	158	122	5.51739	5.98027	3.22098	0.116226	-0.776485	-	NN-NN
C45G9.6	III	5037714	5038268	110	33	188	3.84122	1.24904	4.96348	-1.62074	0.369787	+	gt-ag
F52C9.1	III	5328908	5329297	32	16	77	1.11745	0.605597	2.03291	-0.883774	0.863345	+	gt-ag
dnj-24	III	5416215	5416402	100	131	33	3.49202	4.95833	0.871249	0.505793	-2.0029	-	NN-NN
W03A5.4,W03A5.6	III	5434249	5438845	572	254	443	19.9743	9.61386	11.6959	-1.05496	-0.77215	-	NN-NN
D1044.1	III	5544554	5544713	290	103	290	10.1269	3.89853	7.65643	-1.37718	-0.403442	+	gt-ag
arf-1.2	III	5714978	5716115	267	64	75	9.32369	2.42239	1.98011	-1.94447	-2.23532	+	gt-ag
polq-1	III	5797385	5797721	19	98	82	0.663484	3.70928	2.16492	2.48301	1.70618	-	NN-NN
mdt-15	III	5829733	5830226	1064	1806	2104	37.1551	68.3568	55.5487	0.879526	0.580195	-	NN-NN
pxl-1	III	5895679	5899806	339	425	577	11.8379	16.0862	15.2337	0.442404	0.363844	-	NN-NN
mvk-1	III	6127921	6128322	90	35	314	3.14282	1.32474	8.29007	-1.24634	1.39933	-	NN-NN
F42A10.5	III	6172800	6173397	226	55	167	7.89196	2.08174	4.40905	-1.92259	-0.839917	-	NN-NN
stt-3	III	6250180	6250312	20	18	55	0.698404	0.681297	1.45208	-0.0357771	1.05599	+	gt-ag
C56G2.7	III	6340460	6340692	195	74	182	6.80944	2.80089	4.80507	-1.28165	-0.502978	-	NN-NN
akap-1	III	6346490	6354399	1179	1305	1401	41.1709	49.394	36.9885	0.262712	-0.154549	+	gt-ag
akap-1	III	6357564	6357655	813	927	714	28.3901	35.0868	18.8507	0.30554	-0.590773	+	gt-ag
ten-1	III	6843741	6843970	14	34	20	0.488883	1.28689	0.52803	1.39633	0.111131	+	gt-ag
cra-1	III	6866692	6866766	242	397	394	8.45069	15.0264	10.4022	0.830358	0.299747	-	NN-NN
prk-1	III	7001393	7001496	40	36	20	1.39681	1.36259	0.52803	-0.0357771	-1.40344	+	gt-ag
cyk-1	III	7028580	7032581	771	627	815	26.9235	23.7319	21.5172	-0.182039	-0.323373	-	NN-NN
R01H2.7	III	7042355	7055712	328	498	418	11.4538	18.8492	11.0358	0.718676	-0.0536347	-	NN-NN
B0280.13,B0280.2	III	7126039	7130289	51	63	49	1.78093	2.38454	1.29367	0.421081	-0.461157	+	gt-ag
ogt-1	III	7151017	7151269	102	107	222	3.56186	4.04993	5.86113	0.185268	0.718549	-	NN-NN
acs-4	III	7165274	7167838	72	30	11	2.51425	1.1355	0.290416	-1.14681	-3.11394	+	gt-ag
dpy-31	III	7202269	7202661	27	10	41	0.942845	0.378498	1.08246	-1.31673	0.199223	+	gt-ag
R151.2	III	7212266	7212735	82	15	68	2.86346	0.567748	1.7953	-2.33444	-0.673531	+	gt-ag
fbn-1	III	7634418	7636315	925	928	830	32.3012	35.1247	21.9132	0.120897	-0.559784	+	gt-ag
fbn-1	III	7635165	7636315	71	93	130	2.47933	3.52004	3.43219	0.505638	0.469179	+	gt-ag
C18H2.1	III	7669924	7670314	98	59	47	3.42218	2.23314	1.24087	-0.615841	-1.46356	+	gt-ag
let-754	III	7951601	7953222	56	68	73	1.95553	2.57379	1.92731	0.396334	-0.0209722	-	NN-NN
henn-1	III	8232723	8232887	32	11	28	1.11745	0.416348	0.739242	-1.42434	-0.596087	+	gt-ag
ZC262.1	III	8341065	8341368	50	103	70	1.74601	3.89853	1.8481	1.15887	0.081985	+	gt-ag
R05D3.5,ZC262.1	III	8341065	8349563	50	103	70	1.74601	3.89853	1.8481	1.15887	0.081985	+	gt-ag
zfp-1	III	8794824	8798398	27	80	77	0.942845	3.02799	2.03291	1.68327	1.10846	+	gt-ag
F44E2.3	III	8827658	8827780	88	128	42	3.07298	4.84478	1.10886	0.656794	-1.47056	-	NN-NN
fozi-1	III	9281933	9293195	187	338	683	6.53007	12.7932	18.0322	0.970211	1.46541	+	gt-ag
emb-30	III	9438449	9438864	17	22	34	0.593643	0.832697	0.897651	0.488195	0.596558	-	NN-NN
ctr-9	III	9491499	9491640	47	70	79	1.64125	2.64949	2.08572	0.69092	0.34575	+	gt-ag
C48B4.9	III	9563008	9563136	48	24	13	1.67617	0.908396	0.343219	-0.883774	-2.28796	-	NN-NN
ced-7	III	9579182	9580002	452	389	456	15.7839	14.7236	12.0391	-0.100327	-0.390731	-	NN-NN
ZK632.10	III	9826695	9826816	748	968	610	26.1203	36.6386	16.1049	0.488195	-0.697671	-	NN-NN
K03H1.11	III	9951579	9951751	83	147	111	2.89838	5.56393	2.93057	0.940859	0.0159346	-	NN-NN
rgs-1	III	10014736	10014963	15	127	85	0.523803	4.80693	2.24413	3.19802	2.09906	-	NN-NN
ZK1128.7	III	10135969	10138213	390	288	376	13.6189	10.9008	9.92696	-0.321179	-0.456183	+	gt-ag
spat-2	III	11045491	11052815	26	10	183	0.907925	0.378498	4.83147	-1.26229	2.41182	+	gt-ag
spat-2	III	11045515	11052815	61	201	36	2.13013	7.60782	0.950454	1.83654	-1.16425	+	gt-ag
Y48A6C.2	III	11113691	11113775	104	263	385	3.6317	9.95451	10.1646	1.45471	1.48483	-	NN-NN
Y48A6C.8,linc-76	III	11127025	11129368	91	20	57	3.17774	0.756997	1.50489	-2.06964	-1.07835	-	NN-NN
T28D6.5	III	11338029	11338962	37	44	104	1.29205	1.66539	2.74576	0.366204	1.08754	+	gt-ag
crh-1	III	11685128	11685210	478	302	411	16.6918	11.4307	10.851	-0.546236	-0.621314	+	gt-ag
Y56A3A.31	III	11974526	11982554	268	275	430	9.35861	10.4087	11.3526	0.153425	0.278662	+	gt-ag
arx-3	III	12052714	12053486	130	70	265	4.53962	2.64949	6.9964	-0.776859	0.624039	-	NN-NN
zyg-8	III	12058895	12062925	225	296	219	7.85704	11.2036	5.78193	0.511898	-0.442436	+	gt-ag
Y75B8A.6	III	12124353	12124971	330	398	371	11.5237	15.0642	9.79495	0.386528	-0.234489	-	NN-NN
ani-1	III	12447358	12447888	124	223	266	4.3301	8.44051	7.0228	0.96293	0.697644	-	NN-NN
scav-3	III	12455596	12456404	65	52	91	2.26981	1.96819	2.40254	-0.205702	0.081985	-	NN-NN
Y49E10.21	III	12459204	12461318	51	63	44	1.78093	2.38454	1.16167	0.421081	-0.616436	+	gt-ag
Y111B2A.25	III	12529306	12530086	44	169	60	1.53649	6.39662	1.58409	2.05767	0.0440171	+	gt-ag
aakg-1	III	12544841	12547235	73	57	60	2.54917	2.15744	1.58409	-0.240709	-0.686376	-	NN-NN
epc-1	III	12600540	12600886	270	172	221	9.42845	6.51017	5.83473	-0.534325	-0.692355	-	NN-NN
ssl-1	III	12738396	12739984	135	122	277	4.71423	4.61768	7.31321	-0.0298523	0.633485	+	gt-ag
frm-5.2	IV	7035	7312	45	12	76	1.57141	0.454198	2.00651	-1.79066	0.352633	+	gt-ag
spl-1	IV	383185	383295	75	65	136	2.61901	2.46024	3.5906	-0.0902249	0.455202	-	NN-NN
daf-18	IV	420996	421362	81	42	109	2.82854	1.58969	2.87776	-0.831307	0.0248925	-	NN-NN
cct-8	IV	1090115	1091215	76	71	51	2.65393	2.68734	1.34648	0.0180456	-0.978944	-	NN-NN
plst-1	IV	1293718	1294353	93	49	299	3.24758	1.85464	7.89405	-0.808223	1.2814	+	gt-ag
bus-2	IV	1699378	1699899	63	40	27	2.19997	1.51399	0.71284	-0.539126	-1.62583	+	gt-ag
K08D12.3	IV	1710357	1710566	276	107	292	9.63797	4.04993	7.70924	-1.25083	-0.322142	+	gt-ag
Y54G2A.26,Y54G2A.73	IV	2995573	3000618	224	204	236	7.82212	7.72137	6.23075	-0.0187036	-0.328154	-	NN-NN
mca-3	IV	3132275	3133084	368	433	426	12.8506	16.389	11.247	0.350887	-0.192294	-	NN-NN
M57.2	IV	3526753	3527354	20	47	34	0.698404	1.77894	0.897651	1.34889	0.362093	+	gt-ag
taf-2	IV	3585053	3585870	32	64	123	1.11745	2.42239	3.24738	1.11623	1.53907	-	NN-NN
M02B7.2	IV	3803633	3803706	166	143	459	5.79675	5.41253	12.1183	-0.0989421	1.06387	+	gt-ag
F56D6.17	IV	3896578	3897017	22	45	101	0.768244	1.70324	2.66655	1.14865	1.79534	+	gt-ag
K08D10.9	IV	4159745	4160393	56	70	76	1.95553	2.64949	2.00651	0.438154	0.0371307	+	gt-ag
hoe-1	IV	4743438	4744201	116	305	187	4.05074	11.5442	4.93708	1.51091	0.285472	-	NN-NN
C49A9.4	IV	6220842	6221079	10	53	74	0.349202	2.00604	1.95371	2.52222	2.48408	+	gt-ag
dyci-1	IV	6783309	6783395	16	10	20	0.558723	0.378498	0.52803	-0.561846	-0.0815138	-	NN-NN
C06G3.5	IV	7025446	7026472	22	11	42	0.768244	0.416348	1.10886	-0.883774	0.529444	+	gt-ag
T12B3.4	IV	7386839	7387126	106	265	334	3.70154	10.0302	8.8181	1.43815	1.25234	-	NN-NN
pitr-1	IV	7395377	7395526	224	66	444	7.82212	2.49809	11.7223	-1.64673	0.583619	+	gt-ag
clec-51	IV	8162130	8162290	28	55	67	0.977765	2.08174	1.7689	1.09023	0.855292	-	NN-NN
cdh-5	IV	8671688	8672298	79	61	22	2.75869	2.30884	0.580833	-0.256817	-2.24779	+	gc-ag
C53B4.3	IV	8973316	8973605	264	129	316	9.21893	4.88263	8.34287	-0.916941	-0.144055	-	NN-NN
F56D5.4	IV	9403578	9403696	47	146	36	1.64125	5.52608	0.950454	1.75146	-0.788106	-	NN-NN
pyp-1	IV	9996791	9996906	63	119	36	2.19997	4.50413	0.950454	1.03376	-1.2108	-	NN-NN
pxf-1	IV	10165533	10165769	36	18	29	1.25713	0.681297	0.765643	-0.883774	-0.715386	-	NN-NN
unc-43	IV	10338297	10338704	119	28	14	4.1555	1.0598	0.369621	-1.97124	-3.4909	-	NN-NN
cal-4	IV	10521623	10526099	224	411	521	7.82212	15.5563	13.7552	0.991866	0.814343	+	gt-ag
T01G1.4	IV	11361509	11363781	28	104	32	0.977765	3.93638	0.844848	2.00931	-0.210797	-	NN-NN
gfat-2	IV	11410370	11410485	13	74	17	0.453962	2.80089	0.448825	2.62524	-0.0164187	+	gt-ag
aly-3	IV	12124176	12124247	158	17	16	5.51739	0.643447	0.422424	-3.10009	-3.70722	+	gt-ag
tag-335	IV	12278052	12278397	66	41	48	2.30473	1.55184	1.26727	-0.570616	-0.862873	-	NN-NN
acs-20	IV	12396778	12396888	11	78	42	0.384122	2.95229	1.10886	2.9422	1.52944	-	NN-NN
eef-1B.2	IV	15038802	15038919	24	44	22	0.838084	1.66539	0.580833	0.990695	-0.528973	+	gt-ag
mel-46	IV	16856357	16858017	493	765	632	17.2157	28.9551	16.6857	0.750098	-0.0451049	-	NN-NN
Y39D8A.1	V	417979	420380	65	128	138	2.26981	4.84478	3.64341	1.09386	0.682715	+	gt-ag
K09C6.7,K09C6.8	V	836968	842311	180	124	133	6.28563	4.69338	3.5114	-0.421431	-0.840013	-	NN-NN
T10B5.2	V	1851137	1852346	107	37	45	3.73646	1.40044	1.18807	-1.41579	-1.65306	-	NN-NN
oig-6	V	1882240	1892880	538	362	184	18.7871	13.7016	4.85787	-0.455391	-1.95134	-	NN-NN
Y45G12C.16	V	2530736	2531032	699	511	497	24.4092	19.3413	13.1215	-0.335743	-0.895488	+	gt-ag
W02G9.10,angl-1	V	2654923	2658033	54	48	26	1.88569	1.81679	0.686439	-0.053699	-1.45789	+	gt-ag
T28A11.6	V	3262813	3262919	324	420	780	11.3141	15.8969	20.5932	0.490621	0.864038	+	gt-ag
C04E12.5,F35F10.4,T20D4.3,T20D4.4,T20D4.5,T20D4.7,T20D4.8,arrd-22,srbc-3	V	3262813	3418657	21	31	12	0.733324	1.17335	0.316818	0.678105	-1.2108	+	gt-ag
F35F10.1	V	3317452	3317743	53	283	183	1.85077	10.7115	4.83147	2.53296	1.38434	+	gt-ag
C04E12.4,C04E12.5	V	3317452	3365211	86	104	77	3.00314	3.93638	2.03291	0.390401	-0.56292	+	gt-ag
Y39H10A.4,hpo-36	V	3730922	3733151	224	72	143	7.82212	2.72519	3.77541	-1.5212	-1.05093	-	NN-NN
btb-21	V	3850999	3851177	20	24	61	0.698404	0.908396	1.61049	0.37926	1.20537	-	NN-NN
Y45G5AM.9	V	4191515	4194571	170	34	91	5.93643	1.28689	2.40254	-2.2057	-1.30504	-	NN-NN
Y61A9LA.3	V	4582615	4582706	65	47	66	2.26981	1.77894	1.7425	-0.351553	-0.381416	+	gt-ag
nex-4	V	4851528	4855325	58	62	46	2.02537	2.34669	1.21447	0.212441	-0.737861	+	gt-ag
T19H12.6	V	4877069	4877575	91	45	30	3.17774	1.70324	0.792045	-0.899716	-2.00435	-	NN-NN
Y49G5B.1	V	5223488	5227006	376	583	648	13.13	22.0665	17.1082	0.748989	0.381819	+	gt-ag
F26F12.3	V	5844232	5844361	28	14	241	0.977765	0.529898	6.36276	-0.883774	2.70209	-	NN-NN
pst-1	V	5949558	5950874	342	227	523	11.9427	8.59191	13.808	-0.475078	0.209373	+	gt-ag
fos-1	V	6010987	6011101	195	43	117	6.80944	1.62754	3.08897	-2.06484	-1.14041	+	gt-ag
crt-1	V	6100542	6100618	34	55	88	1.18729	2.08174	2.32333	0.810123	0.968527	-	NN-NN
F46E10.18	V	6521135	6521683	124	23	50	4.3301	0.870546	1.32007	-2.31441	-1.71378	+	gt-ag
Y57E12AL.1	V	7060663	7060811	510	611	503	17.8093	23.1263	13.28	0.376901	-0.423381	+	gt-ag
F27B10.1	V	7072743	7074893	84	74	173	2.9333	2.80089	4.56746	-0.0666381	0.638869	+	gt-ag
F09G2.1	V	7203481	7203614	246	214	302	8.59037	8.09987	7.97325	-0.0848215	-0.107552	+	gt-ag
ddo-2	V	7434602	7434840	936	306	964	32.6853	11.5821	25.451	-1.49675	-0.360917	-	NN-NN
ddo-2	V	7435032	7435152	87	39	115	3.03806	1.47614	3.03617	-1.04132	-0.000895293	-	NN-NN
C37C3.10	V	7862695	7863052	480	21	309	16.7617	0.794847	8.15806	-4.39835	-1.03887	-	NN-NN
let-413	V	7973553	7973988	240	204	135	8.38084	7.72137	3.5642	-0.118239	-1.23352	-	NN-NN
F52E1.9	V	8399348	8402612	418	413	412	14.5966	15.632	10.8774	0.0988648	-0.4243	-	NN-NN
lmd-3	V	8417900	8418371	19	65	79	0.663484	2.46024	2.08572	1.89067	1.65241	-	NN-NN
lmd-3	V	8429927	8430018	26	18	14	0.907925	0.681297	0.369621	-0.414289	-1.29653	-	NN-NN
ZC190.4	V	8650456	8666065	182	30	161	6.35547	1.1355	4.25064	-2.48468	-0.58032	+	gt-ag
C01B7.5,magu-2	V	8795567	8800155	65	13	25	2.26981	0.492048	0.660037	-2.2057	-1.78195	-	NN-NN
F07B7.1,F07B7.2,W09B7.1	V	8830474	8872613	21	103	87	0.733324	3.89853	2.29693	2.41041	1.64718	+	gt-ag
H14N18.4	V	8927520	8927963	13	13	16	0.453962	0.492048	0.422424	0.116226	-0.103882	-	NN-NN
tos-1	V	9343416	9343501	2216	1716	3584	77.3831	64.9503	94.6229	-0.252682	0.290171	-	NN-NN
gpa-3	V	9357070	9357746	42	27	21	1.46665	1.02195	0.554431	-0.521204	-1.40344	-	NN-NN
H24G06.1	V	9444257	9446303	631	702	1331	22.0346	26.5706	35.1404	0.270057	0.673357	+	gt-ag
K09G1.1	V	9586314	9589414	99	72	116	3.4571	2.72519	3.06257	-0.343206	-0.174817	+	gt-ag
F40F9.5	V	9722275	9722565	24	51	14	0.838084	1.93034	0.369621	1.20369	-1.18105	-	NN-NN
rop-1	V	10253917	10254084	21	30	25	0.733324	1.1355	0.660037	0.630799	-0.151903	-	NN-NN
pptr-2	V	11030845	11034747	105	71	269	3.66662	2.68734	7.102	-0.448272	0.953775	-	NN-NN
K10D6.2	V	11194059	11194207	177	416	635	6.18087	15.7455	16.7649	1.34906	1.43957	-	NN-NN
K10D6.2	V	11194059	11194203	130	407	387	4.53962	15.4049	10.2174	1.76274	1.17038	-	NN-NN
nlp-24	V	11616533	11616661	585	363	1001	20.4283	13.7395	26.4279	-0.572241	0.371492	+	gc-ag
T04F3.1	V	11744771	11750459	32	84	159	1.11745	3.17939	4.19784	1.50854	1.90944	+	gt-ag
F55A11.4	V	11770591	11771248	44	10	57	1.53649	0.378498	1.50489	-2.02128	-0.0299835	+	gt-ag
D2023.3	V	11811543	11813339	37	31	93	1.29205	1.17335	2.45534	-0.139031	0.926264	-	NN-NN
sma-1	V	11900886	11901108	67	75	109	2.33965	2.83874	2.87776	0.278955	0.298653	+	gt-ag
ZC116.5	V	12608498	12608866	24	29	71	0.838084	1.09765	1.87451	0.389244	1.16134	-	NN-NN
R11D1.1	V	12704557	12704923	15	100	42	0.523803	3.78498	1.10886	2.85319	1.08198	+	gt-ag
noca-1	V	13153980	13162315	14	184	233	0.488883	6.96437	6.15155	3.83243	3.65339	+	gt-ag
F23B12.4	V	14443402	14444665	19	130	13	0.663484	4.92048	0.343219	2.89067	-0.95093	+	gt-ag
dlat-1	V	14447290	14448674	46	69	36	1.60633	2.61164	0.950454	0.701188	-0.757079	-	NN-NN
C53A5.6	V	14545866	14547378	210	243	267	7.33324	9.19751	7.0492	0.326793	-0.0569914	-	NN-NN
F43D2.7	V	14639462	14640848	24	10	62	0.838084	0.378498	1.63689	-1.14681	0.965792	-	NN-NN
daf-21	V	14685919	14686160	374	1189	2196	13.0601	45.0035	57.9777	1.78486	2.15033	+	gt-ag
ZC412.9	V	14881725	14881871	109	21	46	3.8063	0.794847	1.21447	-2.25964	-1.64806	-	NN-NN
W09D12.1	V	14918920	14919298	248	43	163	8.66021	1.62754	4.30344	-2.41171	-1.00891	-	NN-NN
K06B4.15,K06B4.4	V	15668858	15670858	208	66	28	7.2634	2.49809	0.739242	-1.53982	-3.29653	+	gt-ag
F13A7.11	V	16394563	16394799	718	154	286	25.0727	5.82888	7.55083	-2.10483	-1.73141	-	NN-NN
E01B7.1,E01B7.2,phf-14	V	17865712	17925380	92	91	192	3.21266	3.44434	5.06909	0.100459	0.657959	+	gt-ag
Y37H2A.14	V	18141094	18144055	505	798	1287	17.6347	30.2042	33.9787	0.776331	0.946215	+	gt-ag
R10E8.7	V	18233356	18234569	23	77	32	0.803164	2.91444	0.844848	1.85945	0.0729962	+	gt-ag
nhr-65	V	18841336	18841604	29	15	32	1.01269	0.567748	0.844848	-0.834864	-0.261423	+	gt-ag
srw-86	V	19400404	19400598	42	67	62	1.46665	2.53594	1.63689	0.789998	0.158437	-	NN-NN
kcnl-1	V	19576111	19576524	15	61	89	0.523803	2.30884	2.34973	2.14007	2.1654	+	gt-ag
pcp-4	V	19830099	19830977	51	42	47	1.78093	1.58969	1.24087	-0.163882	-0.521278	-	NN-NN
ttx-1	V	20059754	20061417	13	45	182	0.453962	1.70324	4.80507	1.90764	3.40391	-	NN-NN
F53H2.3	V	20408352	20422004	157	87	165	5.48247	3.29294	4.35625	-0.735451	-0.33174	-	NN-NN
amx-3	V	20901600	20903439	114	72	93	3.9809	2.72519	2.45534	-0.546739	-0.697173	-	NN-NN
Y73B3A.3	X	89163	90065	85	85	102	2.96822	3.21724	2.69295	0.116226	-0.140407	-	NN-NN
Y73B3A.3	X	91345	92143	99	171	25	3.4571	6.47232	0.660037	0.904722	-2.38894	-	NN-NN
Y73B3A.9	X	151300	151415	168	85	174	5.86659	3.21724	4.59386	-0.866701	-0.352816	-	NN-NN
Y73B3B.5	X	200772	202487	86	26	66	3.00314	0.984096	1.7425	-1.6096	-0.785312	+	gt-ag
Y73B3B.5	X	205627	206263	95	228	89	3.31742	8.62976	2.34973	1.37926	-0.497564	+	gt-ag
C04E7.4	X	341232	341773	61	135	246	2.13013	5.10973	6.49477	1.2623	1.60834	-	NN-NN
ZK1193.3,ZK1193.4	X	420057	422950	27	268	301	0.942845	10.1438	7.94685	3.42743	3.07529	-	NN-NN
nas-38	X	560501	561486	128	419	534	4.46978	15.8591	14.0984	1.82703	1.65725	+	gt-ag
mrp-1	X	587483	587628	36	40	200	1.25713	1.51399	5.2803	0.268229	2.07049	-	NN-NN
ifc-2	X	647891	648351	62	71	504	2.16505	2.68734	13.3064	0.311777	2.61964	-	NN-NN
dgk-1	X	991235	991314	107	373	630	3.73646	14.118	16.6329	1.91779	2.1543	-	NN-NN
nlf-1	X	1014184	1015287	38	72	63	1.32697	2.72519	1.66329	1.03822	0.325911	-	NN-NN
C05D9.4	X	1108969	1109961	42	15	60	1.46665	0.567748	1.58409	-1.3692	0.111131	+	gt-ag
tmc-1	X	1166481	1167925	42	58	110	1.46665	2.19529	2.90416	0.58189	0.9856	+	gt-ag
ZK402.5	X	1400483	1401243	71	64	124	2.47933	2.42239	3.27378	-0.0335211	0.401007	-	NN-NN
W05H7.2	X	1435556	1435636	129	107	56	4.5047	4.04993	1.47848	-0.153534	-1.60731	+	gt-ag
toca-1	X	1515853	1516989	48	117	183	1.67617	4.42843	4.83147	1.40163	1.5273	-	NN-NN
swip-10	X	2115651	2117152	192	150	87	6.70468	5.67748	2.29693	-0.239918	-1.54546	-	NN-NN
peb-1	X	2211095	2215630	226	40	42	7.89196	1.51399	1.10886	-2.38202	-2.8313	+	gt-ag
AH9.1	X	2245715	2250168	62	82	59	2.16505	3.10369	1.55769	0.519582	-0.474995	-	NN-NN
AH9.6	X	2264342	2265447	22	41	37	0.768244	1.55184	0.976855	1.01435	0.34658	-	NN-NN
fox-1	X	2450504	2455869	21	43	48	0.733324	1.62754	1.26727	1.15017	0.789203	-	NN-NN
K02E10.7	X	2503290	2503610	258	12	240	9.00941	0.454198	6.33636	-4.31004	-0.507779	-	NN-NN
F52H2.4	X	2546572	2546864	83	26	94	2.89838	0.984096	2.48174	-1.55837	-0.223892	-	NN-NN
F54G2.1	X	2629673	2640159	22	99	314	0.768244	3.74713	8.29007	2.28615	3.43175	-	NN-NN
unc-2	X	2730634	2731401	19	20	66	0.663484	0.756997	1.7425	0.190227	1.39302	-	NN-NN
M02F4.3	X	3039025	3041987	38	131	137	1.32697	4.95833	3.617	1.90172	1.44666	-	NN-NN
sax-3	X	3455447	3455937	151	50	149	5.27295	1.89249	3.93382	-1.47832	-0.422678	-	NN-NN
rgs-7	X	3551897	3552547	61	41	34	2.13013	1.55184	0.897651	-0.456959	-1.24672	+	gt-ag
C01C4.3	X	3703445	3709272	31	19	15	1.08253	0.719147	0.396022	-0.590043	-1.45075	+	gt-ag
ZK470.2	X	4146642	4146761	320	147	262	11.1745	5.56393	6.91719	-1.00603	-0.691947	+	gt-ag
ets-9	X	4280434	4280980	186	81	278	6.49515	3.06584	7.33961	-1.08308	0.17634	+	gt-ag
dop-6	X	4325845	4326165	69	29	273	2.40949	1.09765	7.20761	-1.13432	1.58079	+	gt-ag
pqn-65	X	4616613	4617533	30	137	66	1.04761	5.18543	1.7425	2.30737	0.734062	-	NN-NN
F43C9.2	X	4783823	4788837	77	126	275	2.68885	4.76908	7.26041	0.826719	1.43306	+	gt-ag
calu-1	X	4970911	4972072	41	25	84	1.43173	0.946246	2.21773	-0.59747	0.631324	-	NN-NN
lfi-1	X	4981495	4983563	101	260	428	3.52694	9.84096	11.2998	1.48038	1.67981	+	gt-ag
ags-3	X	5298040	5303474	72	70	44	2.51425	2.64949	1.16167	0.075584	-1.11394	-	NN-NN
egl-13	X	5666235	5668320	51	49	120	1.78093	1.85464	3.16818	0.0585105	0.831023	+	gt-ag
egl-13	X	5670062	5671373	122	182	67	4.26026	6.88867	1.7689	0.693283	-1.26809	+	gt-ag
cyp-43A1	X	5716146	5716793	49	115	73	1.71109	4.35273	1.92731	1.34701	0.171673	+	gt-ag
F49E10.2	X	5893047	5893137	58	45	12	2.02537	1.70324	0.316818	-0.249902	-2.67646	+	gt-ag
acs-17	X	5942047	5944259	41	134	61	1.43173	5.07188	1.61049	1.82476	0.169743	-	NN-NN
R07E4.1	X	5961311	5961425	76	38	29	2.65393	1.43829	0.765643	-0.883774	-1.79339	+	gt-ag
kin-2	X	5973204	5973580	121	37	76	4.22534	1.40044	2.00651	-1.59318	-1.07438	-	NN-NN
F22F4.4	X	5998473	5999293	42	90	354	1.46665	3.40649	9.34613	1.21576	2.67185	-	NN-NN
C09B8.3	X	6009288	6010574	151	87	131	5.27295	3.29294	3.4586	-0.679235	-0.608424	-	NN-NN
T07H6.1	X	6299995	6300140	14	18	32	0.488883	0.681297	0.844848	0.478796	0.789203	+	gt-ag
T10E10.4	X	6318761	6319490	46	70	352	1.60633	2.64949	9.29333	0.721947	2.53243	-	NN-NN
F41C6.7	X	6884726	6885594	38	78	10	1.32697	2.95229	0.264015	1.1537	-2.32944	-	NN-NN
K09F5.6	X	7724629	7725037	159	262	288	5.55231	9.91666	7.60363	0.836766	0.4536	+	gt-ag
C54D2.1	X	7844825	7845046	81	882	691	2.82854	33.3836	18.2434	3.56101	2.68925	+	gt-ag
cca-1	X	7861307	7875903	27	28	34	0.942845	1.0598	0.897651	0.168693	-0.0708665	-	NN-NN
cca-1	X	7861307	7875811	64	22	87	2.23489	0.832697	2.29693	-1.42434	0.0395016	-	NN-NN
catp-5	X	8096707	8097183	28	208	92	0.977765	7.87277	2.42894	3.00931	1.31277	-	NN-NN
K07E3.1	X	8110816	8110895	496	580	740	17.3204	21.9529	19.5371	0.341939	0.173743	+	gt-ag
M60.6	X	8250741	8253912	53	84	60	1.85077	3.17939	1.58409	0.780623	-0.224472	-	NN-NN
K01A12.2	X	8619268	8619737	14	12	39	0.488883	0.454198	1.02966	-0.106166	1.07461	+	gt-ag
rig-1	X	8666208	8669291	118	103	100	4.12058	3.89853	2.64015	-0.0799166	-0.642229	+	gt-ag
acs-22	X	8933514	8934557	21	72	17	0.733324	2.72519	0.448825	1.89383	-0.708296	+	gt-ag
H08J11.2	X	9097252	9097335	175	200	240	6.11103	7.56997	6.33636	0.308871	0.0522376	+	gt-ag
C25A11.2	X	9114192	9114368	23	127	56	0.803164	4.80693	1.47848	2.58135	0.880351	+	gt-ag
gpa-12	X	9243618	9247007	15	15	46	0.523803	0.567748	1.21447	0.116226	1.21323	+	gt-ag
F49E2.5	X	9557050	9557218	105	112	175	3.66662	4.23918	4.62026	0.209335	0.333524	+	gt-ag
F49E2.5	X	9558006	9558259	243	119	15	8.48561	4.50413	0.396022	-0.913769	-4.42136	+	gt-ag
F49E2.2	X	9571106	9572080	174	101	280	6.07611	3.82283	7.39242	-0.668506	0.282898	+	gt-ag
F36G3.2	X	9794273	9795198	26	22	12	0.907925	0.832697	0.316818	-0.124782	-1.51892	-	NN-NN
grk-1	X	9992154	9992957	398	324	418	13.8982	12.2633	11.0358	-0.180549	-0.332707	-	NN-NN
ZC374.2	X	10035311	10035934	87	20	101	3.03806	0.756997	2.66655	-2.00479	-0.188174	-	NN-NN
unc-58	X	10109331	10128929	97	46	97	3.38726	1.74109	2.56094	-0.960125	-0.403442	-	NN-NN
C14H10.2	X	10250992	10252789	64	298	101	2.23489	11.2793	2.66655	2.33539	0.25477	-	NN-NN
pkn-1	X	10400260	10400477	263	347	444	9.18401	13.1339	11.7223	0.516099	0.352055	+	gt-ag
nhx-5	X	10580521	10580600	12	106	111	0.419042	4.01208	2.93057	3.25918	2.80601	+	gt-ag
abl-1	X	10607415	10608443	14	61	148	0.488883	2.30884	3.90742	2.23961	2.99866	-	NN-NN
egl-36	X	10739575	10741452	77	31	10	2.68885	1.17335	0.264015	-1.19636	-3.3483	+	gt-ag
frm-9	X	10822054	10822813	34	10	26	1.18729	0.378498	0.686439	-1.64931	-0.790465	-	NN-NN
del-5	X	11006582	11006659	27	128	91	0.942845	4.84478	2.40254	2.36134	1.34947	-	NN-NN
C34F6.10	X	11236712	11240510	1129	563	700	39.4249	21.3095	18.481	-0.887613	-1.09306	-	NN-NN
hum-4	X	11433011	11433388	232	111	372	8.10148	4.20133	9.82135	-0.947339	0.277736	-	NN-NN
cutl-11	X	11650418	11650799	19	12	65	0.663484	0.454198	1.7161	-0.546739	1.371	-	NN-NN
C34E11.2	X	11806070	11806173	119	158	322	4.1555	5.98027	8.50128	0.525189	1.03266	-	NN-NN
tag-241	X	11824416	11826619	220	351	461	7.68244	13.2853	12.1711	0.790193	0.663821	+	gt-ag
scd-1	X	12514048	12525418	24	42	11	0.838084	1.58969	0.290416	0.923581	-1.52897	-	NN-NN
pgp-13	X	12741892	12742076	71	22	213	2.47933	0.832697	5.62352	-1.57409	1.18152	+	gt-ag
C53C7.5	X	13043505	13043596	80	101	85	2.79361	3.82283	2.24413	0.452509	-0.315979	+	gt-ag
sad-1	X	13488969	13489434	99	42	56	3.4571	1.58969	1.47848	-1.12081	-1.22544	-	NN-NN
hlb-1	X	13870532	13870648	10	12	39	0.349202	0.454198	1.02966	0.37926	1.56003	-	NN-NN
T21H8.5,hlb-1	X	13870532	13876517	529	222	401	18.4728	8.40266	10.587	-1.13648	-0.803107	-	NN-NN
ceh-37	X	14199731	14207812	49	24	72	1.71109	0.908396	1.90091	-0.913521	0.151773	-	NN-NN
madd-3	X	14293688	14295826	296	422	328	10.3364	15.9726	8.65969	0.627872	-0.255343	-	NN-NN
rbc-1	X	14615618	14615874	11	62	134	0.384122	2.34669	3.5378	2.61099	3.20322	+	gt-ag
F40E10.6	X	14704340	14704667	71	27	32	2.47933	1.02195	0.844848	-1.27863	-1.55319	-	NN-NN
unc-7	X	15127175	15142080	69	136	87	2.40949	5.14758	2.29693	1.09516	-0.0690228	-	NN-NN
unc-7	X	15127175	15131753	34	151	50	1.18729	5.71533	1.32007	2.26717	0.152952	-	NN-NN
kin-20	X	15272952	15277700	18	12	15	0.628563	0.454198	0.396022	-0.468737	-0.666476	-	NN-NN
lron-3	X	15551990	15557866	59	250	114	2.06029	9.46246	3.00977	2.19937	0.546805	-	NN-NN
nhr-48	X	15708354	15710056	128	133	134	4.46978	5.03403	3.5378	0.171508	-0.337353	+	gt-ag
C09G1.5	X	15960496	15961893	83	80	17	2.89838	3.02799	0.448825	0.0631146	-2.69102	+	gt-ag
C06G1.5	X	16642295	16652120	564	198	592	19.695	7.49427	15.6297	-1.39397	-0.33354	-	NN-NN
tag-343	X	16666432	16666695	382	389	307	13.3395	14.7236	8.10526	0.142423	-0.718776	-	NN-NN
sto-5	X	16818371	16824035	99	32	61	3.4571	1.21119	1.61049	-1.51313	-1.10206	-	NN-NN
C08A9.6,C08A9.8,sdz-2	X	17095880	17104576	32	64	11	1.11745	2.42239	0.290416	1.11623	-1.94401	-	NN-NN

## Sheet: N
Gene	Chromosome	Start	End	Splice junction score wt	Splice junction score alg-1	Splice junction score alg-2	Normalized wt	Normalized alg-1	Normalized alg-2	log2 fold change alg-1/wt	log5 fold change alg-2/wt	Strand	Splice site
NA	I	111258	111508	19	28	35	0.663484	1.0598	0.924052	0.675653	0.477914	-	NN-NN
NA	I	280431	283519	22	38	21	0.768244	1.43829	0.554431	0.904722	-0.470556	+	gt-ag
NA	I	629692	630312	28	49	10	0.977765	1.85464	0.264015	0.923581	-1.88887	+	at-ac
NA	I	1446569	1446654	82	283	49	2.86346	10.7115	1.29367	1.90333	-1.14628	+	gt-ag
NA	I	1626629	1628413	222	64	224	7.75228	2.42239	5.91393	-1.67819	-0.390503	-	NN-NN
NA	I	1786356	1787056	300	909	1110	10.4761	34.4055	29.3057	1.71554	1.48408	+	at-ac
NA	I	2053339	2053411	104	143	193	3.6317	5.41253	5.09549	0.575658	0.488575	-	NN-NN
NA	I	2053701	2054538	161	150	210	5.62215	5.67748	5.54431	0.0141278	-0.0201132	-	NN-NN
NA	I	2630345	2643149	50	22	25	1.74601	0.832697	0.660037	-1.0682	-1.40344	+	ct-gc
NA	I	2640766	2642260	44	43	57	1.53649	1.62754	1.50489	0.0830591	-0.0299835	-	NN-NN
NA	I	2765345	2765640	32	40	44	1.11745	1.51399	1.16167	0.438154	0.0559898	-	NN-NN
NA	I	3113175	3113255	126	92	50	4.39994	3.48219	1.32007	-0.337492	-1.73687	-	NN-NN
NA	I	3191976	3192545	58	54	72	2.02537	2.04389	1.90091	0.0131325	-0.0914978	-	NN-NN
NA	I	3558305	3561328	157	57	120	5.48247	2.15744	3.16818	-1.3455	-0.791172	-	NN-NN
NA	I	3558447	3561464	528	391	217	18.4379	14.7993	5.72912	-0.317143	-1.68628	-	NN-NN
NA	I	4342761	4345802	2816	2415	5258	98.3352	91.4074	138.819	-0.105398	0.497425	+	gc-ag
NA	I	4342767	4345808	602	531	1321	21.022	20.0983	34.8764	-0.0648257	0.730353	+	gc-ag
NA	I	4342761	4348689	2241	1987	4372	78.2561	75.2076	115.427	-0.0573248	0.560709	+	gc-ag
NA	I	4342767	4348695	576	540	1310	20.114	20.4389	34.586	0.0231166	0.781984	+	gc-ag
NA	I	4342761	4351576	1646	1435	3630	57.4786	54.3145	95.8374	-0.0816876	0.737563	+	gc-ag
NA	I	4342767	4351582	590	542	1298	20.6029	20.5146	34.2691	-0.00619613	0.734062	+	gc-ag
NA	I	4342761	4354463	626	497	1325	21.86	18.8114	34.982	-0.216691	0.678316	+	gc-ag
NA	I	4342767	4354469	575	510	1283	20.0791	19.3034	33.8731	-0.0568387	0.754445	+	gc-ag
NA	I	4342761	4357350	617	544	1280	21.5458	20.5903	33.7939	-0.0654379	0.64936	+	gc-ag
NA	I	4342767	4357356	583	573	1313	20.3585	21.688	34.6652	0.0912652	0.767857	+	gc-ag
NA	I	4345801	4348689	4455	3911	8786	155.569	148.031	231.964	-0.0716619	0.576339	+	gc-ag
NA	I	4345807	4348695	1668	1516	3351	58.2469	57.3804	88.4714	-0.0216236	0.603031	+	gc-ag
NA	I	4345801	4351576	3342	2943	7196	116.703	111.392	189.985	-0.0671982	0.703042	+	gc-ag
NA	I	4345807	4351582	1631	1490	3576	56.9548	56.3963	94.4117	-0.0142185	0.729148	+	gc-ag
NA	I	4345801	4354463	1203	1032	2578	42.009	39.061	68.063	-0.104968	0.696174	+	gc-ag
NA	I	4345807	4354469	1655	1492	3364	57.7929	56.472	88.8146	-0.0333577	0.619905	+	gc-ag
NA	I	4345801	4357350	1229	1005	2687	42.9169	38.0391	70.9408	-0.174063	0.72507	+	gc-ag
NA	I	4345807	4357356	1689	1488	3351	58.9802	56.3206	88.4714	-0.0665688	0.584981	+	gc-ag
NA	I	4348688	4351576	4881	4442	11020	170.445	168.129	290.944	-0.0197414	0.771434	+	gc-ag
NA	I	4348694	4351582	3280	2875	6586	114.538	108.818	173.88	-0.0739079	0.602265	+	gc-ag
NA	I	4348688	4354463	1774	1642	3983	61.9484	62.1494	105.157	0.00467409	0.763408	+	gc-ag
NA	I	4348694	4354469	3248	2971	6697	113.421	112.452	176.811	-0.0123771	0.640521	+	gc-ag
NA	I	4348688	4357350	1760	1633	3992	61.4595	61.8088	105.395	0.00817533	0.778094	+	gc-ag
NA	I	4348694	4357356	3216	2919	6593	112.303	110.484	174.065	-0.0235672	0.632226	+	gc-ag
NA	I	4351575	4354463	2418	2136	5249	84.437	80.8473	138.581	-0.0626766	0.714787	+	gc-ag
NA	I	4351581	4354469	5375	4849	11856	187.696	183.534	313.016	-0.0323515	0.737839	+	gc-ag
NA	I	4351575	4357350	2427	2144	5279	84.7513	81.1501	139.373	-0.0626432	0.717649	+	gc-ag
NA	I	4351581	4357356	5241	4863	11857	183.017	184.064	313.042	0.00823045	0.774383	+	gc-ag
NA	I	4354462	4357350	601	541	1271	20.987	20.4768	33.5563	-0.0355104	0.677085	+	gc-ag
NA	I	4768488	4768994	733	562	990	25.5965	21.2716	26.1375	-0.267017	0.0301735	-	NN-NN
NA	I	5117088	5117262	278	504	530	9.70781	19.0763	13.9928	0.974565	0.527466	-	NN-NN
NA	I	5175536	5176598	56	57	95	1.95553	2.15744	2.50814	0.141761	0.359059	-	NN-NN
NA	I	5485298	5485377	338	330	520	11.803	12.4904	13.7288	0.0816687	0.218047	-	NN-NN
NA	I	5597360	5600674	42	74	89	1.46665	2.80089	2.34973	0.933362	0.679974	-	NN-NN
NA	I	5603490	5604926	93	36	66	3.24758	1.36259	1.7425	-1.25301	-0.898207	-	NN-NN
NA	I	6000886	6003238	140	151	89	4.88883	5.71533	2.34973	0.225348	-1.05699	-	NN-NN
NA	I	6144880	6144963	274	101	135	9.56813	3.82283	3.5642	-1.32359	-1.42466	-	NN-NN
NA	I	6291941	6292245	160	28	171	5.58723	1.0598	4.51466	-2.39835	-0.307517	+	gt-ag
NA	I	6629548	6629651	148	103	21	5.16819	3.89853	0.554431	-0.406727	-3.22058	-	NN-NN
NA	I	6950495	6951193	27	57	15	0.942845	2.15744	0.396022	1.19423	-1.25144	+	gt-ag
NA	I	7094537	7094645	12	33	65	0.419042	1.24904	1.7161	1.57566	2.03396	-	NN-NN
NA	I	7095228	7095486	88	65	112	3.07298	2.46024	2.95697	-0.320838	-0.0555185	+	gt-ag
NA	I	7147290	7147482	1305	889	1143	45.5708	33.6485	30.1769	-0.437569	-0.594666	-	NN-NN
NA	I	7179419	7179675	375	178	138	13.0951	6.73727	3.64341	-0.958787	-1.84566	-	NN-NN
NA	I	7358050	7358254	35	45	40	1.22221	1.70324	1.05606	0.478796	-0.210797	-	NN-NN
NA	I	7486049	7486230	114	31	23	3.9809	1.17335	0.607234	-1.76247	-2.71277	-	NN-NN
NA	I	7490173	7492944	52	109	93	1.81585	4.12563	2.45534	1.18397	0.435277	-	NN-NN
NA	I	7734447	7734650	105	46	100	3.66662	1.74109	2.64015	-1.07446	-0.473831	+	gt-ag
NA	I	8404101	8404343	452	48	48	15.7839	1.81679	1.26727	-3.11899	-3.63866	-	NN-NN
NA	I	8405977	8406482	23	113	19	0.803164	4.27703	0.501628	2.41284	-0.679076	-	NN-NN
NA	I	8707847	8708085	31	92	18	1.08253	3.48219	0.475227	1.68559	-1.18771	-	NN-NN
NA	I	8743439	8743862	211	365	180	7.36816	13.8152	4.75227	0.906879	-0.632688	-	NN-NN
NA	I	8840182	8840699	89	66	18	3.1079	2.49809	0.475227	-0.315113	-2.70925	+	gt-ag
NA	I	9853726	9859272	56	61	140	1.95553	2.30884	3.69621	0.239608	0.918486	+	gt-ag
NA	I	9859349	9860497	421	1580	1158	14.7014	59.8027	30.5729	2.02426	1.0563	+	gt-ag
NA	I	10149871	10149961	118	128	46	4.12058	4.84478	1.21447	0.233583	-1.76252	+	gt-ag
NA	I	10881612	10888961	217	168	68	7.57768	6.35877	1.7953	-0.253008	-2.07753	+	gt-ag
NA	I	10889297	10889979	29	44	64	1.01269	1.66539	1.6897	0.717677	0.738577	+	gt-ag
NA	I	11931396	11931577	30	17	36	1.04761	0.643447	0.950454	-0.703202	-0.140407	+	at-ac
NA	I	12094589	12094683	25	101	46	0.873005	3.82283	1.21447	2.13058	0.476264	-	NN-NN
NA	I	12163533	12163608	116	35	59	4.05074	1.32474	1.55769	-1.61247	-1.37878	-	NN-NN
NA	I	12917803	12918892	1989	1832	2061	69.4563	69.3409	54.4135	-0.0023978	-0.352141	+	gt-ag
NA	I	12940769	12944758	233	83	140	8.1364	3.14154	3.69621	-1.37292	-1.13834	+	gt-ag
NA	I	12949273	12952921	794	230	800	27.7266	8.70546	21.1212	-1.67128	-0.392581	+	gc-ag
NA	I	13265584	13265703	22	16	69	0.768244	0.605597	1.8217	-0.343206	1.24565	-	NN-NN
NA	I	13423447	13426503	11	24	42	0.384122	0.908396	1.10886	1.24176	1.52944	-	NN-NN
NA	I	13493092	13503030	123	190	227	4.29518	7.19147	5.99314	0.743567	0.480592	+	gt-ag
NA	I	13618166	13618943	249	112	59	8.69513	4.23918	1.55769	-1.03642	-2.4808	-	NN-NN
NA	I	13932852	13933279	285	411	512	9.95225	15.5563	13.5176	0.644402	0.44174	+	gt-ag
NA	I	14488004	14488456	40	139	161	1.39681	5.26113	4.25064	1.91324	1.60555	-	NN-NN
NA	II	64126	64332	69	51	41	2.40949	1.93034	1.08246	-0.319873	-1.15441	+	gt-ag
NA	II	78757	79158	68	50	20	2.37457	1.89249	0.52803	-0.327381	-2.16898	-	NN-NN
NA	II	341987	342169	144	69	156	5.02851	2.61164	4.11863	-0.945175	-0.287965	-	NN-NN
NA	II	708557	709105	69	102	122	2.40949	3.86068	3.22098	0.680127	0.418771	+	gt-ag
NA	II	1079713	1079798	171	333	182	5.97135	12.604	4.80507	1.07775	-0.3135	+	gt-ag
NA	II	1236871	1236945	62	16	29	2.16505	0.605597	0.765643	-1.83797	-1.49966	+	gc-ag
NA	II	1769716	1773543	310	278	505	10.8253	10.5223	13.3328	-0.0409574	0.300573	+	gc-ag
NA	II	1769859	1773686	75	165	386	2.61901	6.24522	10.191	1.25373	1.9602	+	at-ac
NA	II	1771993	1775936	10	64	12	0.349202	2.42239	0.316818	2.7943	-0.140407	+	gt-ag
NA	II	1773647	1777335	70	76	245	2.44441	2.87659	6.46837	0.23487	1.40391	+	gc-ag
NA	II	1773685	1777373	37	102	217	1.29205	3.86068	5.72912	1.5792	2.14866	+	at-ac
NA	II	1774639	1778258	20	99	55	0.698404	3.74713	1.45208	2.42365	1.05599	+	gt-ag
NA	II	1829252	1832669	53	132	22	1.85077	4.99618	0.580833	1.4327	-1.67193	+	at-ac
NA	II	1931953	1934939	113	143	173	3.94598	5.41253	4.56746	0.455918	0.211007	+	gt-ag
NA	II	1935016	1953684	146	140	115	5.09835	5.29898	3.03617	0.0556844	-0.747776	+	gt-ag
NA	II	2161309	2161534	148	72	92	5.16819	2.72519	2.42894	-0.923302	-1.08933	-	NN-NN
NA	II	2161678	2162148	75	78	74	2.61901	2.95229	1.95371	0.172809	-0.422807	-	NN-NN
NA	II	2224656	2225561	14	10	15	0.488883	0.378498	0.396022	-0.369201	-0.303906	-	NN-NN
NA	II	2265578	2265662	31	24	19	1.08253	0.908396	0.501628	-0.253008	-1.10971	-	NN-NN
NA	II	2465453	2465639	18	90	208	0.628563	3.40649	5.49151	2.43815	3.12707	-	NN-NN
NA	II	2623425	2624578	215	141	160	7.50784	5.33683	4.22424	-0.492416	-0.829707	+	gt-ag
NA	II	2895750	2896786	236	263	607	8.24116	9.95451	16.0257	0.272502	0.959468	-	NN-NN
NA	II	2895670	2896786	85	36	20	2.96822	1.36259	0.52803	-1.12324	-2.4909	-	NN-NN
NA	II	2901840	2905634	249	150	245	8.69513	5.67748	6.46837	-0.614957	-0.426806	-	NN-NN
NA	II	2901840	2903213	44	54	127	1.53649	2.04389	3.35299	0.411682	1.12581	-	NN-NN
NA	II	2901840	2902423	176	201	307	6.14595	7.60782	8.10526	0.307846	0.399221	-	NN-NN
NA	II	2902539	2903213	214	317	369	7.47292	11.9984	9.74215	0.683098	0.382568	-	NN-NN
NA	II	2902539	2905634	200	190	271	6.98404	7.19147	7.1548	0.0422254	0.034851	-	NN-NN
NA	II	2904148	2905634	416	402	434	14.5268	15.2156	11.4582	0.0668379	-0.34233	-	NN-NN
NA	II	3015005	3015840	179	161	170	6.25071	6.09382	4.48825	-0.0366729	-0.477867	+	gt-ag
NA	II	3182688	3183348	10	31	26	0.349202	1.17335	0.686439	1.74849	0.97507	-	NN-NN
NA	II	3304297	3305666	158	116	48	5.51739	4.39058	1.26727	-0.329574	-2.12226	-	NN-NN
NA	II	3304297	3309916	158	116	48	5.51739	4.39058	1.26727	-0.329574	-2.12226	-	NN-NN
NA	II	3304297	3305145	72	146	154	2.51425	5.52608	4.06583	1.13613	0.69342	-	NN-NN
NA	II	3305375	3305666	82	96	312	2.86346	3.63358	8.23727	0.343636	1.52441	-	NN-NN
NA	II	3305375	3309916	82	96	312	2.86346	3.63358	8.23727	0.343636	1.52441	-	NN-NN
NA	II	3306934	3307408	115	258	106	4.01582	9.76526	2.79856	1.28196	-0.521011	-	NN-NN
NA	II	3309491	3309916	167	39	223	5.83167	1.47614	5.88753	-1.98208	0.0137538	-	NN-NN
NA	II	3310888	3311258	801	548	634	27.9711	20.7417	16.7385	-0.4314	-0.740761	-	NN-NN
NA	II	3316435	3317456	232	213	275	8.10148	8.06202	7.26041	-0.0070454	-0.158135	-	NN-NN
NA	II	3995336	3995667	36	12	22	1.25713	0.454198	0.580833	-1.46874	-1.11394	-	NN-NN
NA	II	3995758	3995855	23	12	14	0.803164	0.454198	0.369621	-0.822373	-1.11965	-	NN-NN
NA	II	4049139	4049681	18	40	17	0.628563	1.51399	0.448825	1.26823	-0.485904	-	NN-NN
NA	II	4069688	4069868	192	82	72	6.70468	3.10369	1.90091	-1.11118	-1.81848	+	gt-ag
NA	II	4235630	4237225	23	78	11	0.803164	2.95229	0.290416	1.87807	-1.46757	-	NN-NN
NA	II	4334811	4335676	218	151	319	7.6126	5.71533	8.42208	-0.413554	0.145786	+	gt-ag
NA	II	4782923	4783004	162	23	264	5.65707	0.870546	6.96999	-2.70006	0.301102	-	NN-NN
NA	II	4783057	4784424	34	48	100	1.18729	1.81679	2.64015	0.613726	1.15295	-	NN-NN
NA	II	4789073	4789160	409	123	19	14.2824	4.65553	0.501628	-1.61722	-4.83147	-	NN-NN
NA	II	4789390	4789535	725	555	125	25.3171	21.0067	3.30019	-0.269267	-2.93949	-	NN-NN
NA	II	5098997	5099434	86	330	288	3.00314	12.4904	7.60363	2.05628	1.34022	-	NN-NN
NA	II	5130506	5130612	67	124	134	2.33965	4.69338	3.5378	1.00433	0.596558	-	NN-NN
NA	II	5174217	5174400	951	232	245	33.2091	8.78116	6.46837	-1.91909	-2.36011	-	NN-NN
NA	II	5426596	5427432	1258	693	977	43.9296	26.2299	25.7943	-0.743979	-0.768143	-	NN-NN
NA	II	5495336	5519867	193	74	159	6.7396	2.80089	4.19784	-1.26678	-0.683016	+	at-ac
NA	II	5495456	5519987	47	31	12	1.64125	1.17335	0.316818	-0.484167	-2.37307	+	at-ac
NA	II	5513782	5514869	52	96	52	1.81585	3.63358	1.37288	1.00075	-0.403442	-	NN-NN
NA	II	5621765	5630228	1626	1433	1891	56.7802	54.2388	49.9252	-0.0660627	-0.18562	-	NN-NN
NA	II	5623544	5632007	302	60	132	10.5459	2.27099	3.485	-2.21529	-1.59745	+	ct-ac
NA	II	5675855	6059670	276	140	193	9.63797	5.29898	5.09549	-0.863015	-0.919509	-	NN-NN
NA	II	5679300	5684491	83	188	274	2.89838	7.11577	7.23401	1.29578	1.31955	-	NN-NN
NA	II	5689563	5689936	421	415	561	14.7014	15.7077	14.8112	0.0955171	0.0107387	-	NN-NN
NA	II	5753494	5756047	2049	2610	5888	71.5515	98.7881	155.452	0.465356	1.11942	+	gt-ag
NA	II	5753572	5756125	3947	4080	7204	137.83	154.427	190.196	0.164039	0.4646	+	at-ac
NA	II	5753908	5756461	627	689	1193	21.895	26.0785	31.497	0.252265	0.524615	+	at-ac
NA	II	5758097	5758508	178	111	65	6.21579	4.20133	1.7161	-0.565092	-1.85681	+	gt-ag
NA	II	5791905	5792430	53	53	116	1.85077	2.00604	3.06257	0.116226	0.726619	-	NN-NN
NA	II	5803976	5804747	335	153	506	11.6983	5.79103	13.3592	-1.0144	0.191534	-	NN-NN
NA	II	6460679	6461665	48	112	14	1.67617	4.23918	0.369621	1.33862	-2.18105	-	NN-NN
NA	II	6461939	6462870	148	135	14	5.16819	5.10973	0.369621	-0.0164118	-3.80554	-	NN-NN
NA	II	6601130	6603452	478	303	670	16.6918	11.4685	17.689	-0.541467	0.0837086	-	NN-NN
NA	II	6668098	6668681	203	625	415	7.0888	23.6562	10.9566	1.7386	0.62819	+	gt-ag
NA	II	6668185	6668681	287	406	525	10.0221	15.367	13.8608	0.616655	0.467825	+	gt-ag
NA	II	6668098	6668795	81	135	73	2.82854	5.10973	1.92731	0.853192	-0.553467	+	gt-ag
NA	II	6668362	6668681	255	687	1162	8.90465	26.0028	30.6785	1.54604	1.7846	+	gt-ag
NA	II	6679178	6679877	14	27	67	0.488883	1.02195	1.7689	1.06376	1.85529	+	at-ac
NA	II	6710522	7167799	191	106	143	6.66976	4.01208	3.77541	-0.733282	-0.820999	-	NN-NN
NA	II	6779909	6780304	35	46	33	1.22221	1.74109	0.871249	0.510505	-0.488331	-	NN-NN
NA	II	6880898	6884241	271	249	335	9.46337	9.42461	8.8445	-0.00592114	-0.0975736	-	NN-NN
NA	II	6927909	6930003	11	26	14	0.384122	0.984096	0.369621	1.35723	-0.0555185	-	NN-NN
NA	II	6976133	6976226	40	121	33	1.39681	4.57983	0.871249	1.71316	-0.680976	-	NN-NN
NA	II	6997610	6997786	535	998	710	18.6823	37.7741	18.7451	1.01573	0.00483828	-	NN-NN
NA	II	7018804	7018950	86	125	359	3.00314	4.73123	9.47814	0.655746	1.65813	+	at-ac
NA	II	7074255	7083016	162	456	1068	5.65707	17.2595	28.1968	1.60927	2.3174	+	gc-ag
NA	II	7123706	7152954	483	438	724	16.8665	16.5782	19.1147	-0.0248663	0.180525	+	gc-ag
NA	II	7123940	7153167	185	223	120	6.46023	8.44051	3.16818	0.385744	-1.02793	+	gc-ag
NA	II	7258068	7258419	547	525	1037	19.1013	19.8712	27.3783	0.0570026	0.519361	+	gt-ag
NA	II	7359368	7359954	26	60	57	0.907925	2.27099	1.50489	1.32268	0.729008	+	gt-ag
NA	II	7518879	7519208	14	42	51	0.488883	1.58969	1.34648	1.70119	1.46163	-	NN-NN
NA	II	8000463	8004202	365	50	165	12.7459	1.89249	4.35625	-2.75167	-1.54887	-	NN-NN
NA	II	8939222	8939441	731	617	458	25.5267	23.3534	12.0919	-0.128375	-1.07797	-	NN-NN
NA	II	9056907	9057000	59	41	61	2.06029	1.55184	1.61049	-0.408865	-0.355348	-	NN-NN
NA	II	9070904	9076427	72	27	119	2.51425	1.02195	3.14178	-1.29881	0.321451	-	NN-NN
NA	II	9410896	9411137	35	60	19	1.22221	2.27099	0.501628	0.893834	-1.2848	-	NN-NN
NA	II	9658286	9659662	150	101	96	5.23803	3.82283	2.53454	-0.454381	-1.0473	-	NN-NN
NA	II	9658451	9659824	354	298	305	12.3617	11.2793	8.05245	-0.132211	-0.618382	-	NN-NN
NA	II	9658646	9660013	52	58	37	1.81585	2.19529	0.976855	0.273767	-0.894428	-	NN-NN
NA	II	9794093	9796204	68	10	119	2.37457	0.378498	3.14178	-2.64931	0.403913	-	NN-NN
NA	II	9796228	9798742	273	18	354	9.53321	0.681297	9.34613	-3.80661	-0.0285934	-	NN-NN
NA	II	9924480	9924608	210	230	139	7.33324	8.70546	3.66981	0.247471	-0.998746	+	gt-ag
NA	II	10528247	10530337	827	53	276	28.879	2.00604	7.28681	-3.8476	-1.98666	+	gt-ag
NA	II	11109566	11112750	1250	914	796	43.6502	34.5948	21.0156	-0.335436	-1.05453	+	gt-ag
NA	II	11170937	11174571	34	44	65	1.18729	1.66539	1.7161	0.488195	0.531463	+	gt-ag
NA	II	11175903	11175978	186	241	178	6.49515	9.12181	4.69947	0.489956	-0.466867	+	gt-ag
NA	II	11203326	11203772	411	663	1175	14.3522	25.0944	31.0218	0.806096	1.11201	+	gt-ag
NA	II	12221789	12224977	51	193	183	1.78093	7.30502	4.83147	2.03626	1.43983	-	NN-NN
NA	II	12377117	12379232	220	52	86	7.68244	1.96819	2.27053	-1.96469	-1.75854	-	NN-NN
NA	II	12555417	12555886	21	11	22	0.733324	0.416348	0.580833	-0.81666	-0.336328	+	gt-ag
NA	II	13014955	13015157	48	56	222	1.67617	2.11959	5.86113	0.338618	1.80601	-	NN-NN
NA	II	13045645	13045788	55	212	241	1.92061	8.02417	6.36276	2.06279	1.72809	+	gt-ag
NA	II	13157756	13184519	154	178	841	5.37771	6.73727	22.2037	0.325173	2.04573	+	at-ac
NA	II	14293426	14297903	29	93	114	1.01269	3.52004	3.00977	1.7974	1.57147	+	gt-ag
NA	II	14300061	14304017	48	48	192	1.67617	1.81679	5.06909	0.116226	1.59656	-	NN-NN
NA	II	14300157	14304113	391	233	1226	13.6538	8.81901	32.3682	-0.630613	1.24528	-	NN-NN
NA	II	14300973	14305204	453	429	613	15.8188	16.2376	16.1841	0.0376926	0.0329342	-	NN-NN
NA	II	14300973	14309437	452	429	613	15.7839	16.2376	16.1841	0.0408808	0.0361225	-	NN-NN
NA	II	14683304	14683391	723	32	581	25.2473	1.21119	15.3393	-4.38163	-0.718899	-	NN-NN
NA	II	14691511	14691596	134	272	289	4.67931	10.2952	7.63003	1.1376	0.705395	+	gt-ag
NA	II	14692823	14692914	48	84	60	1.67617	3.17939	1.58409	0.923581	-0.0815138	+	gt-ag
NA	II	14711855	14718926	2294	708	2003	80.1069	26.7977	52.8822	-1.57982	-0.599145	+	at-ac
NA	II	14711914	14718985	417	297	656	14.5617	11.2414	17.3194	-0.373358	0.250207	+	gt-ag
NA	II	14713433	14720504	269	1036	784	9.39353	39.2124	20.6988	2.06157	1.13981	+	at-ac
NA	II	14717787	14724858	51	56	109	1.78093	2.11959	2.87776	0.251156	0.692317	-	NN-NN
NA	II	15165649	15178566	539	516	161	18.822	19.5305	4.25064	0.0533118	-2.14667	-	NN-NN
NA	II	15197647	15207505	30	83	190	1.04761	3.14154	5.01628	1.58437	2.25952	+	gt-ag
NA	III	52517	52878	573	265	481	20.0093	10.0302	12.6991	-0.996317	-0.65594	+	gt-ag
NA	III	107442	107817	19	31	111	0.663484	1.17335	2.93057	0.822495	2.14305	-	NN-NN
NA	III	243161	243581	489	542	130	17.076	20.5146	3.43219	0.264684	-2.31476	+	gt-at
NA	III	249095	249691	21	120	67	0.733324	4.54198	1.7689	2.6308	1.27033	+	gt-at
NA	III	266524	268536	462	540	427	16.1331	20.4389	11.2734	0.341293	-0.517099	+	gt-ag
NA	III	313793	313948	125	91	42	4.36502	3.44434	1.10886	-0.341764	-1.97691	+	gt-ag
NA	III	333833	334760	190	574	246	6.63484	21.7258	6.49477	1.71128	-0.030783	-	NN-NN
NA	III	335153	336071	160	42	64	5.58723	1.58969	1.6897	-1.81338	-1.72537	-	NN-NN
NA	III	484032	484599	151	44	280	5.27295	1.66539	7.39242	-1.66275	0.487436	+	gt-ag
NA	III	484718	485224	68	48	82	2.37457	1.81679	2.16492	-0.386274	-0.133353	+	gt-ag
NA	III	572133	573974	697	426	886	24.3394	16.124	23.3917	-0.594079	-0.0572938	+	gt-ag
NA	III	890619	891072	16	175	35	0.558723	6.62372	0.924052	3.56744	0.725841	-	NN-NN
NA	III	941156	945152	15	43	37	0.523803	1.62754	0.976855	1.6356	0.899121	-	NN-NN
NA	III	1248427	1249083	47	223	94	1.64125	8.44051	2.48174	2.36254	0.596558	-	NN-NN
NA	III	1253578	1253697	130	29	262	4.53962	1.09765	6.91719	-2.04816	0.607613	-	NN-NN
NA	III	1253578	1262138	130	29	262	4.53962	1.09765	6.91719	-2.04816	0.607613	-	NN-NN
NA	III	1316644	1318748	60	83	137	2.09521	3.14154	3.617	0.584375	0.7877	+	gt-ag
NA	III	1385232	1387455	96	170	26	3.35234	6.43447	0.686439	0.940654	-2.28796	+	gt-ag
NA	III	1442137	1442699	104	180	78	3.6317	6.81297	2.05932	0.907639	-0.818479	+	gt-ag
NA	III	1526545	1528094	110	131	140	3.84122	4.95833	3.69621	0.368289	-0.0555185	-	NN-NN
NA	III	1589444	1590254	246	122	102	8.59037	4.61768	2.69295	-0.895551	-1.67353	-	NN-NN
NA	III	1589444	1599267	21	214	188	0.733324	8.09987	4.96348	3.46538	2.75883	-	NN-NN
NA	III	1599472	1601064	291	91	290	10.1618	3.44434	7.65643	-1.56085	-0.408408	-	NN-NN
NA	III	1788405	1789037	459	240	229	16.0284	9.08396	6.04594	-0.819234	-1.40659	+	gt-ag
NA	III	1858772	1859132	150	136	453	5.23803	5.14758	11.9599	-0.0251299	1.19111	+	gt-ag
NA	III	1975797	1976513	28	11	64	0.977765	0.416348	1.6897	-1.2317	0.789203	-	NN-NN
NA	III	2426607	2427217	172	163	162	6.00627	6.16952	4.27704	0.0386894	-0.489857	+	gt-ag
NA	III	2461964	2462528	78	70	101	2.72377	2.64949	2.66655	-0.0398932	-0.0306326	+	gc-ag
NA	III	2461964	2462249	293	413	448	10.2316	15.632	11.8279	0.611467	0.209156	+	gc-ag
NA	III	2461964	2462807	44	21	56	1.53649	0.794847	1.47848	-0.950888	-0.0555185	+	gc-ag
NA	III	2462248	2462528	597	245	377	20.8474	9.27321	9.95336	-1.16872	-1.06661	+	gc-ag
NA	III	2462248	2462807	565	231	415	19.7299	8.74331	10.9566	-1.17413	-0.848581	+	gc-ag
NA	III	2462513	2462793	957	818	909	33.4186	30.9612	23.999	-0.110192	-0.47768	+	at-ac
NA	III	2523171	2524632	59	251	173	2.06029	9.50031	4.56746	2.20513	1.14854	-	NN-NN
NA	III	2580640	2581897	55	72	221	1.92061	2.72519	5.83473	0.504791	1.6031	+	gt-ag
NA	III	2604417	2605196	35	101	78	1.22221	3.82283	2.05932	1.64515	0.752677	+	gt-ag
NA	III	2686499	2686888	114	282	363	3.9809	10.6737	9.58374	1.42289	1.26749	+	gt-ag
NA	III	2824663	2825696	322	106	246	11.2443	4.01208	6.49477	-1.48677	-0.791844	+	gt-ag
NA	III	2824670	2825696	344	258	322	12.0125	9.76526	8.50128	-0.298812	-0.49879	+	gt-ag
NA	III	3228502	3228849	66	112	74	2.30473	4.23918	1.95371	0.879187	-0.238383	+	gt-ag
NA	III	3228932	3229263	93	191	111	3.24758	7.22932	2.93057	1.1545	-0.148185	+	gt-ag
NA	III	3231274	3231525	56	10	12	1.95553	0.378498	0.316818	-2.3692	-2.62583	+	gt-ag
NA	III	3322513	3322962	74	23	43	2.58409	0.870546	1.13526	-1.56967	-1.18663	+	gt-ag
NA	III	3419902	3420415	418	109	222	14.5966	4.12563	5.86113	-1.82295	-1.31639	+	gc-ag
NA	III	3539701	4016706	6245	4895	7473	218.077	185.275	197.298	-0.235167	-0.144456	-	NN-NN
NA	III	3723316	4175893	99	114	82	3.4571	4.31488	2.16492	0.319759	-0.675246	-	NN-NN
NA	III	3855317	3855886	119	217	151	4.1555	8.21342	3.98663	0.982959	-0.0598549	+	gt-ag
NA	III	4041542	4042370	70	72	20	2.44441	2.72519	0.52803	0.156868	-2.2108	-	NN-NN
NA	III	4042417	4054061	67	89	35	2.33965	3.36864	0.924052	0.52587	-1.34025	-	NN-NN
NA	III	4042410	4054012	213	187	42	7.438	7.07792	1.10886	-0.0715892	-2.74583	-	NN-NN
NA	III	4042809	4047694	31	30	14	1.08253	1.1355	0.369621	0.0689203	-1.55028	-	NN-NN
NA	III	4323551	4324149	101	516	404	3.52694	19.5305	10.6662	2.46924	1.59656	+	gt-ag
NA	III	4333062	4333135	506	150	142	17.6696	5.67748	3.74901	-1.63795	-2.23669	+	gt-ag
NA	III	4333224	4333394	295	39	85	10.3015	1.47614	2.24413	-2.80294	-2.19862	+	gt-ag
NA	III	4849097	4849270	94	91	232	3.2825	3.44434	6.12515	0.0694318	0.89995	-	NN-NN
NA	III	4946280	4946615	836	1769	1481	29.1933	66.9564	39.1006	1.19759	0.421555	+	gt-ag
NA	III	5267485	5267686	520	1026	1194	18.1585	38.8339	31.5234	1.09667	0.795777	-	NN-NN
NA	III	5387462	5387568	134	298	522	4.67931	11.2793	13.7816	1.26931	1.55837	-	NN-NN
NA	III	5478384	5478717	293	159	102	10.2316	6.01812	2.69295	-0.765648	-1.92577	+	gt-ag
NA	III	5576607	5577025	18	19	111	0.628563	0.719147	2.93057	0.194228	2.22105	+	gt-ag
NA	III	5609978	5610234	2060	1180	1556	71.9356	44.6628	41.0807	-0.687632	-0.808244	+	at-ac
NA	III	5727685	5727760	67	12	24	2.33965	0.454198	0.633636	-2.3649	-1.88457	-	NN-NN
NA	III	5931918	5932447	331	161	169	11.5586	6.09382	4.46185	-0.923545	-1.37325	+	gt-ag
NA	III	5941494	5941723	1887	1271	2061	65.8944	48.1071	54.4135	-0.453904	-0.276192	+	gt-ag
NA	III	5941516	5941745	2757	1673	2420	96.275	63.3228	63.8916	-0.604436	-0.591534	+	at-ac
NA	III	5941494	5942004	25	13	92	0.873005	0.492048	2.42894	-0.827191	1.47626	+	gt-ag
NA	III	5941448	5942690	137	32	113	4.78407	1.21119	2.98337	-1.98181	-0.681295	+	at-ac
NA	III	5941494	5942736	25	13	92	0.873005	0.492048	2.42894	-0.827191	1.47626	+	gt-ag
NA	III	5941494	5942964	1532	1010	1585	53.4977	38.2283	41.8464	-0.484835	-0.354375	+	gt-ag
NA	III	5941494	5943192	767	535	932	26.7838	20.2497	24.6062	-0.403462	-0.122338	+	gt-ag
NA	III	5941516	5943214	592	374	723	20.6728	14.1558	19.0883	-0.546333	-0.115043	+	at-ac
NA	III	5941494	5943470	698	731	697	24.3743	27.6682	18.4018	0.18287	-0.40551	+	gt-ag
NA	III	5941516	5943492	467	556	515	16.3077	21.0445	13.5968	0.367888	-0.262292	+	at-ac
NA	III	5941577	5941806	135	154	141	4.71423	5.82888	3.72261	0.306197	-0.340706	+	gc-ag
NA	III	5941577	5942087	73	54	91	2.54917	2.04389	2.40254	-0.318711	-0.0854718	+	gc-ag
NA	III	5941577	5943275	73	54	87	2.54917	2.04389	2.29693	-0.318711	-0.150323	+	gc-ag
NA	III	5941744	5943492	483	773	516	16.8665	29.2579	13.6232	0.794671	-0.308094	+	at-ac
NA	III	5941744	5942986	936	811	888	32.6853	30.6962	23.4445	-0.0905806	-0.479391	+	at-ac
NA	III	5941744	5943214	592	374	725	20.6728	14.1558	19.1411	-0.546333	-0.111058	+	at-ac
NA	III	5941805	5942087	1387	812	1601	48.4343	30.7341	42.2688	-0.65619	-0.196436	+	gc-ag
NA	III	5941744	5942254	17	378	36	0.593643	14.3072	0.950454	4.59101	0.67902	+	at-ac
NA	III	5941805	5943275	967	565	1109	33.7678	21.3852	29.2793	-0.659039	-0.20577	+	gc-ag
NA	III	5941957	5942414	177	287	272	6.18087	10.8629	7.18121	0.813527	0.216415	+	at-ac
NA	III	5942108	5943297	2071	1206	2467	72.3197	45.6469	65.1325	-0.663872	-0.151012	+	gt-ag
NA	III	5942985	5943492	785	1048	547	27.4123	39.6666	14.4416	0.5331	-0.924594	+	at-ac
NA	III	5942985	5943214	435	283	509	15.1903	10.7115	13.4384	-0.503987	-0.176792	+	at-ac
NA	III	6065354	6504779	110	188	155	3.84122	7.11577	4.09223	0.889455	0.0913228	+	gt-ag
NA	III	6087537	6087619	239	129	191	8.34592	4.88263	5.04268	-0.773414	-0.72688	-	NN-NN
NA	III	6152496	6152621	120	206	227	4.19042	7.79707	5.99314	0.895836	0.516216	+	gt-ag
NA	III	6152696	6152776	163	205	298	5.69199	7.75922	7.86764	0.446978	0.466999	+	gt-ag
NA	III	6152854	6152976	81	26	90	2.82854	0.984096	2.37613	-1.52318	-0.251439	+	gt-ag
NA	III	6225844	6226180	146	342	230	5.09835	12.9446	6.07234	1.34425	0.252224	-	NN-NN
NA	III	6226255	6226487	74	227	301	2.58409	8.59191	7.94685	1.73332	1.62072	-	NN-NN
NA	III	6229402	6230870	35	90	164	1.22221	3.40649	4.32984	1.4788	1.82483	-	NN-NN
NA	III	6346490	6346711	372	374	753	12.9903	14.1558	19.8803	0.123962	0.613905	+	gt-ag
NA	III	6543111	6555156	61	44	61	2.13013	1.66539	1.61049	-0.35508	-0.403442	-	NN-NN
NA	III	6631109	6631196	676	1124	1320	23.606	42.5432	34.85	0.849773	0.562001	+	gt-ag
NA	III	6863144	6863271	91	81	208	3.17774	3.06584	5.49151	-0.0517187	0.789203	+	at-ac
NA	III	6944712	6945253	2173	745	2030	75.8816	28.1981	53.595	-1.42815	-0.50165	-	NN-NN
NA	III	7211579	7212151	238	14	93	8.311	0.529898	2.45534	-3.97124	-1.7591	-	NN-NN
NA	III	7227903	7228174	148	120	227	5.16819	4.54198	5.99314	-0.186337	0.213653	-	NN-NN
NA	III	7357791	7358039	93	80	22	3.24758	3.02799	0.580833	-0.101005	-2.48317	+	gt-ag
NA	III	7471803	7475904	47	10	37	1.64125	0.378498	0.976855	-2.11643	-0.748577	-	NN-NN
NA	III	7647022	7647093	18	69	88	0.628563	2.61164	2.32333	2.05483	1.88606	-	NN-NN
NA	III	7716082	7716162	171	181	94	5.97135	6.85082	2.48174	0.198219	-1.26671	+	gt-ag
NA	III	7958972	7959120	17	27	32	0.593643	1.02195	0.844848	0.783651	0.509095	-	NN-NN
NA	III	8149105	8152441	10	43	19	0.349202	1.62754	0.501628	2.22056	0.522558	+	gt-ag
NA	III	8343547	8351743	2224	3695	3037	77.6625	139.855	80.1813	0.848644	0.0460483	-	NN-NN
NA	III	8343616	8343860	3817	4958	5456	133.29	187.66	144.047	0.493545	0.111963	-	NN-NN
NA	III	8343965	8352161	690	2836	2545	24.0949	107.342	67.1918	2.15542	1.47956	-	NN-NN
NA	III	8791661	8792109	90	112	35	3.14282	4.23918	0.924052	0.431728	-1.76601	+	gt-ag
NA	III	8853972	8854186	896	772	1014	31.2885	29.2201	26.7711	-0.0986719	-0.224955	+	gt-ag
NA	III	8854299	8854378	1174	910	1313	40.9963	34.4434	34.6652	-0.251268	-0.242007	+	gt-ag
NA	III	8854717	8859645	181	142	132	6.32055	5.37468	3.485	-0.233873	-0.858894	+	gt-ag
NA	III	9281933	9286026	341	694	1196	11.9078	26.2678	31.5762	1.14139	1.40693	+	gt-ag
NA	III	9284775	9286026	19	18	29	0.663484	0.681297	0.765643	0.0382235	0.206612	+	gt-ag
NA	III	9340824	9340954	92	115	131	3.21266	4.35273	3.4586	0.438154	0.106419	-	NN-NN
NA	III	9768513	9914872	117	186	190	4.08566	7.04007	5.01628	0.78502	0.296049	+	at-ac
NA	III	9768460	9914819	74	164	82	2.58409	6.20737	2.16492	1.26432	-0.255343	+	at-ac
NA	III	9768473	9914832	117	165	356	4.08566	6.24522	9.39893	0.612183	1.20193	+	at-ac
NA	III	9768528	9914887	40	148	321	1.39681	5.60178	8.47488	2.00375	2.60106	+	gt-at
NA	III	9914871	9923459	624	1341	957	21.7902	50.7566	25.2662	1.21992	0.213531	+	at-ac
NA	III	9916481	9925922	148	31	181	5.16819	1.17335	4.77867	-2.13903	-0.113049	-	NN-NN
NA	III	10655119	10655775	480	577	589	16.7617	21.8394	15.5505	0.381763	-0.108209	+	gt-ag
NA	III	10982916	10985330	5447	20790	22090	190.21	786.898	583.209	2.04858	1.61642	-	NN-NN
NA	III	10983000	10985414	427	1350	960	14.9109	51.0973	25.3454	1.77688	0.765356	+	at-ac
NA	III	10982925	10985339	1060	4362	5455	37.0154	165.101	144.02	2.15715	1.96007	-	NN-NN
NA	III	10982937	10985351	1336	5221	6674	46.6534	197.614	176.204	2.08263	1.91719	-	NN-NN
NA	III	10983202	10985561	791	2122	3131	27.6219	80.3174	82.6631	1.5399	1.58143	-	NN-NN
NA	III	10984695	10986950	664	909	1618	23.187	34.4055	42.7176	0.569323	0.881515	-	NN-NN
NA	III	10985528	10987775	287	322	783	10.0221	12.1876	20.6724	0.282236	1.04452	-	NN-NN
NA	III	12547307	12559999	110	129	261	3.84122	4.88263	6.89079	0.346094	0.843104	-	NN-NN
NA	III	12855319	12855465	172	55	64	6.00627	2.08174	1.6897	-1.52868	-1.82971	-	NN-NN
NA	III	12972603	12972771	341	105	17	11.9078	3.97423	0.448825	-1.58316	-4.72961	+	gt-ag
NA	III	13364781	13365076	101	81	166	3.52694	3.06584	4.38265	-0.202136	0.313386	-	NN-NN
NA	III	13480780	13481419	56	25	13	1.95553	0.946246	0.343219	-1.04727	-2.51036	-	NN-NN
NA	III	13602557	13602810	50	54	45	1.74601	2.04389	1.18807	0.227257	-0.555445	-	NN-NN
NA	III	13605226	13605562	17	32	119	0.593643	1.21119	3.14178	1.02876	2.40391	+	at-ac
NA	IV	23387	23614	44	51	86	1.53649	1.93034	2.27053	0.32922	0.563391	+	gt-ag
NA	IV	24267	24494	37	27	50	1.29205	1.02195	1.32007	-0.33834	0.030961	-	NN-NN
NA	IV	410995	414241	31	22	66	1.08253	0.832697	1.7425	-0.378539	0.686756	+	gt-ag
NA	IV	508112	702377	264	521	767	9.21893	19.7198	20.2499	1.09697	1.13525	+	gt-ag
NA	IV	508654	702917	49	103	56	1.71109	3.89853	1.47848	1.18802	-0.210797	+	gt-ag
NA	IV	508953	703219	144	201	289	5.02851	7.60782	7.63003	0.597353	0.601559	+	gt-ag
NA	IV	509229	703493	33	15	66	1.15237	0.567748	1.7425	-1.02128	0.596558	+	gt-ag
NA	IV	509380	703647	33	61	47	1.15237	2.30884	1.24087	1.00257	0.106753	+	gt-ag
NA	IV	509770	704037	88	61	21	3.07298	2.30884	0.554431	-0.412468	-2.47056	+	gt-ag
NA	IV	510277	704540	15	46	66	0.523803	1.74109	1.7425	1.7329	1.73406	+	gt-ag
NA	IV	511369	511454	134	272	289	4.67931	10.2952	7.63003	1.1376	0.705395	+	gt-ag
NA	IV	511369	705674	134	272	289	4.67931	10.2952	7.63003	1.1376	0.705395	+	gt-ag
NA	IV	511684	705954	30	91	68	1.04761	3.44434	1.7953	1.71713	0.77713	+	gt-ag
NA	IV	511811	706083	50	163	12	1.74601	6.16952	0.316818	1.8211	-2.46234	+	gt-ag
NA	IV	512389	706658	52	59	71	1.81585	2.23314	1.87451	0.298429	0.0458656	+	gt-ag
NA	IV	512531	706799	18	82	55	0.628563	3.10369	1.45208	2.30385	1.20799	+	gt-ag
NA	IV	512681	512772	48	84	60	1.67617	3.17939	1.58409	0.923581	-0.0815138	+	gt-ag
NA	IV	512681	706992	48	84	60	1.67617	3.17939	1.58409	0.923581	-0.0815138	+	gt-ag
NA	IV	705589	705674	134	272	289	4.67931	10.2952	7.63003	1.1376	0.705395	+	gt-ag
NA	IV	706901	706992	48	142	60	1.67617	5.37468	1.58409	1.68101	-0.0815138	+	gt-ag
NA	IV	833044	833116	71	11	100	2.47933	0.416348	2.64015	-2.57409	0.0906672	+	gt-ag
NA	IV	891564	895717	987	415	268	34.4662	15.7077	7.0756	-1.13371	-2.28426	+	at-ac
NA	IV	891564	899869	972	442	246	33.9424	16.7296	6.49477	-1.02068	-2.38574	+	at-ac
NA	IV	891564	904022	969	427	245	33.8377	16.1619	6.46837	-1.06603	-2.38716	+	at-ac
NA	IV	891564	908174	995	425	249	34.7456	16.0862	6.57397	-1.11101	-2.40199	+	at-ac
NA	IV	895716	899869	1651	652	452	57.6532	24.6781	11.9335	-1.22417	-2.27239	+	at-ac
NA	IV	895716	904022	1560	693	451	54.4755	26.2299	11.9071	-1.05439	-2.19379	+	at-ac
NA	IV	895716	908174	1596	657	463	55.7326	24.8673	12.2239	-1.16427	-2.18882	+	at-ac
NA	IV	896701	905007	110	412	230	3.84122	15.5941	6.07234	2.02137	0.660688	+	at-ac
NA	IV	896701	909159	110	412	229	3.84122	15.5941	6.04594	2.02137	0.654402	+	at-ac
NA	IV	899868	904022	2342	956	686	81.7831	36.1844	18.1114	-1.17643	-2.1749	+	at-ac
NA	IV	899868	908174	2296	984	639	80.1767	37.2442	16.8706	-1.10617	-2.24868	+	at-ac
NA	IV	900853	905007	220	808	26	7.68244	30.5827	0.686439	1.99308	-3.48436	+	at-ac
NA	IV	900853	909159	220	808	450	7.68244	30.5827	11.8807	1.99308	0.62898	+	at-ac
NA	IV	904021	908174	848	378	251	29.6123	14.3072	6.62677	-1.04945	-2.15982	+	at-ac
NA	IV	905006	909159	110	412	238	3.84122	15.5941	6.28355	2.02137	0.710016	+	at-ac
NA	IV	1091244	1091698	41	182	206	1.43173	6.88867	5.43871	2.26647	1.92551	-	NN-NN
NA	IV	1186583	1187801	23	13	34	0.803164	0.492048	0.897651	-0.706896	0.160459	+	gt-ag
NA	IV	1781653	1802111	62	85	90	2.16505	3.21724	2.37613	0.571421	0.134215	-	NN-NN
NA	IV	1847002	1847097	127	14	206	4.43486	0.529898	5.43871	-3.0651	0.294374	+	gt-ag
NA	IV	2689744	2690550	763	488	928	26.6441	18.4707	24.5006	-0.528576	-0.121	-	NN-NN
NA	IV	2905315	2905742	285	409	512	9.95225	15.4806	13.5176	0.637365	0.44174	-	NN-NN
NA	IV	2907396	2907902	89	42	41	3.1079	1.58969	1.08246	-0.96719	-1.52162	-	NN-NN
NA	IV	2918580	2918701	327	386	375	11.4189	14.61	9.90056	0.355536	-0.205842	+	gt-ag
NA	IV	3137774	3138542	633	358	648	22.1045	13.5502	17.1082	-0.70602	-0.369654	+	gt-ag
NA	IV	3315165	3315592	285	411	512	9.95225	15.5563	13.5176	0.644402	0.44174	+	gt-ag
NA	IV	4148820	4153146	212	116	228	7.40308	4.39058	6.01954	-0.753713	-0.298472	+	at-ac
NA	IV	4180466	4181302	455	484	733	15.8887	18.3193	19.3523	0.205366	0.284505	+	gt-ag
NA	IV	4181592	4181664	82	168	358	2.86346	6.35877	9.45173	1.15099	1.72282	+	gt-ag
NA	IV	4389746	4389887	100	18	30	3.49202	0.681297	0.792045	-2.35771	-2.14041	-	NN-NN
NA	IV	4682291	4683016	12	26	20	0.419042	0.984096	0.52803	1.2317	0.333524	+	gt-ag
NA	IV	4716220	4717056	455	484	733	15.8887	18.3193	19.3523	0.205366	0.284505	+	gt-ag
NA	IV	4717346	4717418	82	168	358	2.86346	6.35877	9.45173	1.15099	1.72282	+	gt-ag
NA	IV	4780095	4780170	64	13	81	2.23489	0.492048	2.13852	-2.18333	-0.0635918	-	NN-NN
NA	IV	5060901	5060974	321	139	237	11.2094	5.26113	6.25715	-1.09126	-0.841128	-	NN-NN
NA	IV	5845533	6278629	28	50	37	0.977765	1.89249	0.976855	0.952727	-0.0013434	-	NN-NN
NA	IV	6611843	6616960	409	204	230	14.2824	7.72137	6.07234	-0.887306	-1.23391	-	NN-NN
NA	IV	6789639	6790400	59	107	73	2.06029	4.04993	1.92731	0.97505	-0.0962603	-	NN-NN
NA	IV	7053945	7054135	140	15	43	4.88883	0.567748	1.13526	-3.10617	-2.10646	-	NN-NN
NA	IV	7720771	7721485	131	104	148	4.57454	3.93638	3.90742	-0.216757	-0.227411	+	at-ac
NA	IV	7814567	7815124	52	183	330	1.81585	6.92652	8.71249	1.93149	2.26244	+	at-ac
NA	IV	7956983	7957574	48	86	83	1.67617	3.25509	2.19132	0.957528	0.386635	+	gt-ag
NA	IV	7957335	7957574	252	172	149	8.79989	6.51017	3.93382	-0.434789	-1.16155	+	gt-ag
NA	IV	7962043	7970532	21	39	16	0.733324	1.47614	0.422424	1.00931	-0.795759	+	gt-ag
NA	IV	8390961	8392521	77	42	55	2.68885	1.58969	1.45208	-0.758243	-0.888869	-	NN-NN
NA	IV	8390961	8416748	121	111	179	4.22534	4.20133	4.72587	-0.0082214	0.161511	-	NN-NN
NA	IV	8390961	8418290	77	42	64	2.68885	1.58969	1.6897	-0.758243	-0.670228	-	NN-NN
NA	IV	8391478	8393005	32	68	102	1.11745	2.57379	2.69295	1.20369	1.26898	-	NN-NN
NA	IV	8393004	8417265	174	59	76	6.07611	2.23314	2.00651	-1.44407	-1.59846	-	NN-NN
NA	IV	8393043	8393194	211	130	270	7.36816	4.92048	7.1284	-0.582505	-0.0477254	-	NN-NN
NA	IV	8393419	8393654	35	78	98	1.22221	2.95229	2.58735	1.27235	1.08198	-	NN-NN
NA	IV	8416747	8418290	77	42	64	2.68885	1.58969	1.6897	-0.758243	-0.670228	-	NN-NN
NA	IV	9104191	9104306	137	73	88	4.78407	2.76304	2.32333	-0.791982	-1.04204	-	NN-NN
NA	IV	9231057	9236540	25	10	11	0.873005	0.378498	0.290416	-1.2057	-1.58787	-	NN-NN
NA	IV	10555687	10558760	186	62	135	6.49515	2.34669	3.5642	-1.46874	-0.865785	+	at-ac
NA	IV	11338069	11406714	24	21	124	0.838084	0.794847	3.27378	-0.0764191	1.96579	-	NN-NN
NA	IV	11621912	11624713	2728	573	1761	95.2623	21.688	46.493	-2.13501	-1.03489	-	NN-NN
NA	IV	13578281	13598057	15	60	118	0.523803	2.27099	3.11538	2.11623	2.57231	-	NN-NN
NA	IV	13593589	13745698	303	49	21	10.5808	1.85464	0.554431	-2.51224	-4.2543	+	gt-ag
NA	IV	13593722	13745781	271	227	113	9.46337	8.59191	2.98337	-0.139375	-1.66541	+	at-ac
NA	IV	13597920	13598057	15	60	118	0.523803	2.27099	3.11538	2.11623	2.57231	-	NN-NN
NA	IV	14056560	14060903	775	521	1736	27.0631	19.7198	45.833	-0.456687	0.760057	+	gt-ag
NA	IV	16858040	16858354	238	401	400	8.311	15.1778	10.5606	0.868867	0.345597	-	NN-NN
NA	IV	17470701	17470864	85	69	46	2.96822	2.61164	1.21447	-0.184641	-1.28927	-	NN-NN
NA	IV	17471037	17471200	41	92	96	1.43173	3.48219	2.53454	1.28224	0.823969	-	NN-NN
NA	V	622567	626050	15	74	99	0.523803	2.80089	2.61375	2.41879	2.31902	-	NN-NN
NA	V	769469	769554	171	333	182	5.97135	12.604	4.80507	1.07775	-0.3135	+	gt-ag
NA	V	770772	770863	48	84	60	1.67617	3.17939	1.58409	0.923581	-0.0815138	+	gt-ag
NA	V	866477	870764	2109	1012	3213	73.6467	38.304	84.828	-0.943124	0.20392	-	NN-NN
NA	V	913132	937321	80	66	90	2.79361	2.49809	2.37613	-0.161308	-0.233517	+	gt-ag
NA	V	913156	937345	200	187	125	6.98404	7.07792	3.30019	0.0192642	-1.08151	+	at-ac
NA	V	1383254	1384039	150	172	251	5.23803	6.51017	6.62677	0.313672	0.339283	-	NN-NN
NA	V	2121691	2121868	694	889	1506	24.2346	33.6485	39.7606	0.473474	0.714272	-	NN-NN
NA	V	2379457	2487738	630	239	1225	21.9997	9.04611	32.3418	-1.28212	0.555916	-	NN-NN
NA	V	2379511	2386456	388	585	778	13.549	22.1422	20.5404	0.708606	0.600272	-	NN-NN
NA	V	2379511	2494735	362	585	778	12.6411	22.1422	20.5404	0.808673	0.700339	-	NN-NN
NA	V	2392857	2501137	182	404	180	6.35547	15.2913	4.75227	1.26664	-0.419383	+	at-ac
NA	V	2449010	2564201	442	280	180	15.4347	10.598	4.75227	-0.542394	-1.69949	+	gc-ag
NA	V	2449025	2564216	149	148	102	5.20311	5.60178	2.69295	0.106511	-0.950185	+	at-ac
NA	V	2453568	2561848	1345	198	1094	46.9677	7.49427	28.8832	-2.64781	-0.701435	+	at-ac
NA	V	2453646	2561926	580	509	1488	20.2537	19.2656	39.2854	-0.0721613	0.955808	+	gt-ag
NA	V	2487791	2494735	721	716	1556	25.1775	27.1005	41.0807	0.106186	0.706329	-	NN-NN
NA	V	2556273	2561806	3080	1628	3342	107.554	61.6195	88.2338	-0.803604	-0.28566	+	at-ac
NA	V	2557289	2564201	445	280	181	15.5395	10.598	4.77867	-0.552153	-1.70126	+	gc-ag
NA	V	2557304	2564216	149	148	102	5.20311	5.60178	2.69295	0.106511	-0.950185	+	at-ac
NA	V	3192398	3194358	461	368	382	16.0982	13.9287	10.0854	-0.208835	-0.674636	-	NN-NN
NA	V	3280927	3349218	64	53	243	2.23489	2.00604	6.41556	-0.155854	1.52137	+	at-ac
NA	V	3315123	3390842	132	51	143	4.60946	1.93034	3.77541	-1.25574	-0.287965	-	NN-NN
NA	V	3328802	3328887	140	186	131	4.88883	7.04007	3.4586	0.526102	-0.499302	+	gt-ag
NA	V	3330114	3330205	48	88	47	1.67617	3.33079	1.24087	0.990695	-0.433815	+	gt-ag
NA	V	3463789	3463886	61	45	53	2.13013	1.70324	1.39928	-0.322658	-0.606259	+	gt-ag
NA	V	3820194	3820413	92	168	184	3.21266	6.35877	4.85787	0.984981	0.596558	-	NN-NN
NA	V	3980457	3984652	355	176	493	12.3967	6.66157	13.0159	-0.896018	0.0703268	+	gc-ag
NA	V	3980457	3988152	355	171	486	12.3967	6.47232	12.8311	-0.937597	0.0496954	+	gc-ag
NA	V	3984651	3988152	1577	3419	2801	55.0691	129.409	73.9506	1.23262	0.425317	+	gc-ag
NA	V	4043945	4046435	680	835	1472	23.7457	31.6046	38.863	0.412467	0.710729	+	at-ac
NA	V	4064181	4066144	15	100	62	0.523803	3.78498	1.63689	2.85319	1.64386	-	NN-NN
NA	V	4164674	4164831	33	13	19	1.15237	0.492048	0.501628	-1.22773	-1.19991	+	gt-ag
NA	V	4555151	4556052	30	45	23	1.04761	1.70324	0.607234	0.701188	-0.78677	+	gt-ag
NA	V	4617646	4617938	155	504	429	5.41263	19.0763	11.3262	1.81738	1.06527	+	gt-ag
NA	V	4733673	4733769	16	109	20	0.558723	4.12563	0.52803	2.88441	-0.0815138	+	gt-ag
NA	V	5557303	5564318	124	137	171	4.3301	5.18543	4.51466	0.260062	0.0602144	-	NN-NN
NA	V	5597458	5598640	18	36	29	0.628563	1.36259	0.765643	1.11623	0.284614	-	NN-NN
NA	V	5622450	5623692	59	51	16	2.06029	1.93034	0.422424	-0.0939917	-2.28608	+	gt-ag
NA	V	5868146	5869249	66	86	46	2.30473	3.25509	1.21447	0.498097	-0.924274	-	NN-NN
NA	V	6315185	6324890	105	529	92	3.66662	20.0226	2.42894	2.4491	-0.594125	+	at-ac
NA	V	6364771	6367756	42	18	55	1.46665	0.681297	1.45208	-1.10617	-0.0143996	-	NN-NN
NA	V	6399575	6408435	8451	7761	9331	295.11	293.753	246.352	-0.00665354	-0.260532	-	NN-NN
NA	V	6399678	6408538	818	923	824	28.5647	34.9354	21.7548	0.290456	-0.392898	-	NN-NN
NA	V	6452189	6452747	121	200	517	4.22534	7.56997	13.6496	0.841219	1.69172	+	gt-ag
NA	V	6695125	6695434	140	392	481	4.88883	14.8371	12.6991	1.60165	1.37717	-	NN-NN
NA	V	7077091	7077507	475	486	530	16.5871	18.395	13.9928	0.149255	-0.245377	+	at-ac
NA	V	7360535	7362970	198	33	94	6.9142	1.24904	2.48174	-2.46874	-1.47821	-	NN-NN
NA	V	8056020	8056401	14	26	53	0.488883	0.984096	1.39928	1.00931	1.51712	+	gt-ag
NA	V	8626457	8626610	14	31	10	0.488883	1.17335	0.264015	1.26307	-0.888869	+	gt-ag
NA	V	8684372	8685012	736	277	476	25.7013	10.4844	12.5671	-1.29359	-1.03219	-	NN-NN
NA	V	8829134	8871229	204	501	176	7.12372	18.9628	4.64666	1.41247	-0.616436	+	at-ac
NA	V	8829167	8871262	181	380	362	6.32055	14.3829	9.55734	1.18624	0.596558	+	gt-ag
NA	V	8829200	8871295	54	143	31	1.88569	5.41253	0.818446	1.52121	-1.20413	+	at-ac
NA	V	8907318	8907623	163	91	170	5.69199	3.44434	4.48825	-0.724708	-0.342779	+	gt-ag
NA	V	9160405	9165067	70149	192173	244173	2449.62	7273.72	6446.53	1.57014	1.39597	-	NN-NN
NA	V	9160405	9162762	4722	7621	18039	164.893	288.454	476.257	0.806808	1.53021	-	NN-NN
NA	V	9162761	9165067	46521	124758	159486	1624.52	4722.07	4210.67	1.5394	1.37403	-	NN-NN
NA	V	9340956	9342204	58	110	223	2.02537	4.16348	5.88753	1.0396	1.53948	-	NN-NN
NA	V	9341807	9343010	175	199	337	6.11103	7.53212	8.8973	0.301639	0.541952	-	NN-NN
NA	V	9505010	9505605	41	55	21	1.43173	2.08174	0.554431	0.540034	-1.36868	+	gt-ag
NA	V	9629072	9629153	15	277	928	0.523803	10.4844	24.5006	4.32308	5.54765	-	NN-NN
NA	V	10073384	10073645	221	27	205	7.71736	1.02195	5.41231	-2.91679	-0.511864	+	at-ac
NA	V	10421543	10424662	1298	6485	10282	45.3264	245.456	271.46	2.43704	2.58232	-	NN-NN
NA	V	10421730	10424849	5083	19363	39543	177.499	732.886	1043.99	2.04578	2.55623	-	NN-NN
NA	V	10447584	10447874	106	22	24	3.70154	0.832697	0.633636	-2.15226	-2.5464	+	gt-ag
NA	V	10980778	10981131	169	86	267	5.90151	3.25509	7.0492	-0.858389	0.256375	-	NN-NN
NA	V	11072334	11077222	32130	26060	37589	1121.99	986.367	992.406	-0.185858	-0.177052	-	NN-NN
NA	V	11571757	11574893	121	71	117	4.22534	2.68734	3.08897	-0.65289	-0.45194	+	at-ac
NA	V	11814209	11818196	1326	487	1257	46.3042	18.4329	33.1867	-1.32886	-0.480538	-	NN-NN
NA	V	12337766	12337928	151	16	132	5.27295	0.605597	3.485	-3.12218	-0.597452	-	NN-NN
NA	V	12408590	12409096	18	35	33	0.628563	1.32474	0.871249	1.07558	0.471027	-	NN-NN
NA	V	13129676	13129867	25	22	37	0.873005	0.832697	0.976855	-0.0681986	0.162155	+	at-ac
NA	V	13199183	13201968	2660	8976	13299	92.8877	339.74	351.113	1.87087	1.91838	-	NN-NN
NA	V	13199261	13202046	86	1256	2176	3.00314	47.5394	57.4496	3.98458	4.25776	-	NN-NN
NA	V	13411415	13415482	354	1086	1799	12.3617	41.1049	47.4963	1.73343	1.94193	+	gt-ag
NA	V	14031983	14470914	92	198	198	3.21266	7.49427	5.2275	1.22202	0.702353	+	gt-ag
NA	V	14202818	14203245	285	409	512	9.95225	15.4806	13.5176	0.637365	0.44174	-	NN-NN
NA	V	14869677	14870138	33	98	124	1.15237	3.70928	3.27378	1.68654	1.50636	-	NN-NN
NA	V	14909122	14909337	145	28	33	5.06343	1.0598	0.871249	-2.25633	-2.53896	-	NN-NN
NA	V	14921123	14921484	995	950	829	34.7456	35.9573	21.8868	0.049457	-0.666766	+	at-ac
NA	V	15533964	15534442	20	12	64	0.698404	0.454198	1.6897	-0.62074	1.27463	-	NN-NN
NA	V	15580848	15585112	16	51	22	0.558723	1.93034	0.580833	1.78865	0.0559898	-	NN-NN
NA	V	15586153	15588910	30	40	115	1.04761	1.51399	3.03617	0.531263	1.53516	+	gt-ag
NA	V	15586807	15588910	30	40	98	1.04761	1.51399	2.58735	0.531263	1.30438	+	gt-ag
NA	V	15596003	15596082	41	17	77	1.43173	0.643447	2.03291	-1.15386	0.505793	-	NN-NN
NA	V	16794959	16795331	361	118	199	12.6062	4.46628	5.2539	-1.49699	-1.26267	+	gt-ag
NA	V	17263668	17264071	16	62	110	0.558723	2.34669	2.90416	2.07042	2.37792	-	NN-NN
NA	V	17343127	17343229	54	56	164	1.88569	2.11959	4.32984	0.168693	1.19922	-	NN-NN
NA	V	17632960	17633365	39	17	51	1.36189	0.643447	1.34648	-1.08171	-0.0164187	-	NN-NN
NA	V	17646052	17646138	42	37	62	1.46665	1.40044	1.63689	-0.0666381	0.158437	-	NN-NN
NA	V	17646649	17648149	170	49	292	5.93643	1.85464	7.70924	-1.67846	0.376992	-	NN-NN
NA	V	17648448	17648541	56	29	322	1.95553	1.09765	8.50128	-0.833148	2.12012	-	NN-NN
NA	V	17730372	17731255	30	18	133	1.04761	0.681297	3.5114	-0.62074	1.74495	-	NN-NN
NA	V	18047569	18055955	326	673	525	11.384	25.4729	13.8608	1.16196	0.284004	+	at-ac
NA	V	18235035	18235110	23	30	37	0.803164	1.1355	0.976855	0.499555	0.28245	+	gt-ag
NA	V	18235403	18235808	165	113	149	5.76183	4.27703	3.93382	-0.429917	-0.550596	+	gt-ag
NA	V	18736932	18737360	740	984	501	25.8409	37.2442	13.2271	0.527359	-0.966157	-	NN-NN
NA	V	18736932	18737700	34	157	75	1.18729	5.94243	1.98011	2.32338	0.737914	-	NN-NN
NA	V	18737470	18737700	398	207	221	13.8982	7.83492	5.83473	-0.826912	-1.25216	-	NN-NN
NA	V	19049789	19050156	3523	2741	4077	123.024	103.746	107.639	-0.245876	-0.192738	+	gt-ag
NA	V	19201825	19201931	173	11	95	6.04119	0.416348	2.50814	-3.85897	-1.26821	-	NN-NN
NA	V	19349493	19362599	31	135	169	1.08253	5.10973	4.46185	2.23885	2.04324	-	NN-NN
NA	V	19411683	19446673	199	69	107	6.94912	2.61164	2.82496	-1.41187	-1.2986	-	NN-NN
NA	V	19481774	19482603	19	18	13	0.663484	0.681297	0.343219	0.0382235	-0.95093	+	gt-ag
NA	V	19750292	19753850	3707	2282	3602	129.449	86.3733	95.0982	-0.583727	-0.444896	-	NN-NN
NA	V	19870087	19870497	29	27	86	1.01269	1.02195	2.27053	0.0131325	1.16484	+	gt-ag
NA	V	20162858	20162957	15	10	13	0.523803	0.378498	0.343219	-0.468737	-0.609893	+	at-ac
NA	V	20180531	20180685	127	66	179	4.43486	2.49809	4.72587	-0.828065	0.0916892	-	NN-NN
NA	X	366	3430	107	115	268	3.73646	4.35273	7.0756	0.220249	0.92118	+	gt-ag
NA	X	93705	94750	28	120	32	0.977765	4.54198	0.844848	2.21576	-0.210797	-	NN-NN
NA	X	135251	135592	17	48	24	0.593643	1.81679	0.633636	1.61373	0.0940578	+	gt-ag
NA	X	151990	152329	11	48	50	0.384122	1.81679	1.32007	2.24176	1.78098	-	NN-NN
NA	X	153106	153772	409	401	546	14.2824	15.1778	14.4152	0.0877274	0.0133583	-	NN-NN
NA	X	154490	154693	143	233	224	4.99359	8.81901	5.91393	0.820541	0.244042	-	NN-NN
NA	X	160921	162643	86	274	98	3.00314	10.3709	2.58735	1.78799	-0.214997	-	NN-NN
NA	X	190562	191156	69	18	14	2.40949	0.681297	0.369621	-1.82237	-2.70461	+	gt-ag
NA	X	192994	194038	78	35	81	2.72377	1.32474	2.13852	-1.03989	-0.348994	+	gt-ag
NA	X	197830	199022	70	243	67	2.44441	9.19751	1.7689	1.91176	-0.466636	+	gt-ag
NA	X	227413	236875	243	100	231	8.48561	3.78498	6.09874	-1.16473	-0.476505	-	NN-NN
NA	X	227863	237327	114	110	220	3.9809	4.16348	5.80833	0.0646957	0.545028	-	NN-NN
NA	X	230459	239924	224	230	390	7.82212	8.70546	10.2966	0.154361	0.396534	+	gt-ag
NA	X	313527	314421	22	47	24	0.768244	1.77894	0.633636	1.21138	-0.277911	+	gt-ag
NA	X	341931	344166	92	56	33	3.21266	2.11959	0.871249	-0.599981	-1.88261	-	NN-NN
NA	X	346300	347137	96	189	208	3.35234	7.15362	5.49151	1.09351	0.712035	-	NN-NN
NA	X	417545	417616	116	115	39	4.05074	4.35273	1.02966	0.103735	-1.97602	-	NN-NN
NA	X	650106	652049	230	651	465	8.03164	24.6402	12.2767	1.61725	0.612155	-	NN-NN
NA	X	887074	887549	161	194	219	5.62215	7.34287	5.78193	0.385222	0.0404283	-	NN-NN
NA	X	934789	935539	20	44	20	0.698404	1.66539	0.52803	1.25373	-0.403442	+	gt-ag
NA	X	939937	940170	180	300	243	6.28563	11.355	6.41556	0.853192	0.0295176	+	gt-ag
NA	X	1015440	1016016	50	208	130	1.74601	7.87277	3.43219	2.17281	0.97507	-	NN-NN
NA	X	1421929	1423036	69	133	149	2.40949	5.03403	3.93382	1.06298	0.707202	+	gt-ag
NA	X	1484075	1484174	5188	4304	4438	181.166	162.906	117.17	-0.153274	-0.628711	+	gt-ag
NA	X	1504624	1504883	303	762	837	10.5808	28.8416	22.098	1.4467	1.06247	-	NN-NN
NA	X	1621158	1621518	25	15	41	0.873005	0.567748	1.08246	-0.62074	0.310254	+	gt-ag
NA	X	2075190	2075496	34	11	22	1.18729	0.416348	0.580833	-1.51181	-1.03147	+	gc-ag
NA	X	2117233	2117374	292	118	119	10.1967	4.46628	3.14178	-1.19096	-1.69845	-	NN-NN
NA	X	2185840	2186727	10	28	100	0.349202	1.0598	2.64015	1.60165	2.91849	+	gt-ag
NA	X	2186901	2192521	85	55	155	2.96822	2.08174	4.09223	-0.511805	0.463292	+	gt-ag
NA	X	2390596	2390745	38	22	25	1.32697	0.832697	0.660037	-0.67227	-1.00751	+	gt-ag
NA	X	2548046	2548669	169	148	94	5.90151	5.60178	2.48174	-0.0752001	-1.24973	-	NN-NN
NA	X	2548747	2548842	59	97	58	2.06029	3.67143	1.53129	0.833496	-0.428104	-	NN-NN
NA	X	3259387	3261038	813	1014	1324	28.3901	38.3797	34.9556	0.434956	0.300134	+	at-ac
NA	X	3506419	3508942	29	41	29	1.01269	1.55184	0.765643	0.615797	-0.403442	-	NN-NN
NA	X	3597964	3598496	230	228	266	8.03164	8.62976	7.0228	0.103626	-0.193649	+	at-ac
NA	X	4702576	4702803	207	69	88	7.22848	2.61164	2.32333	-1.46874	-1.6375	-	NN-NN
NA	X	4702858	4703264	185	62	95	6.46023	2.34669	2.50814	-1.46096	-1.36497	-	NN-NN
NA	X	5029407	5029740	10	15	41	0.349202	0.567748	1.08246	0.701188	1.63218	-	NN-NN
NA	X	5275287	5276516	62	71	126	2.16505	2.68734	3.32659	0.311777	0.619642	-	NN-NN
NA	X	5396931	5397015	128	15	76	4.46978	0.567748	2.00651	-2.97688	-1.15551	-	NN-NN
NA	X	5430793	5440298	45	19	21	1.57141	0.719147	0.554431	-1.1277	-1.50298	+	gt-ag
NA	X	5496385	5496845	177	181	205	6.18087	6.85082	5.41231	0.148466	-0.191567	-	NN-NN
NA	X	5512129	5516962	723	847	1413	25.2473	32.0588	37.3053	0.344592	0.563252	-	NN-NN
NA	X	5558168	5558919	74	81	105	2.58409	3.06584	2.77216	0.246623	0.10135	+	gt-ag
NA	X	5636634	5636810	349	883	409	12.1871	33.4214	10.7982	1.45541	-0.174568	+	gt-ag
NA	X	5675781	5675912	70	132	263	2.44441	4.99618	6.94359	1.03134	1.50619	-	NN-NN
NA	X	5676077	5676383	86	127	119	3.00314	4.80693	3.14178	0.678646	0.0651112	-	NN-NN
NA	X	5919419	5919761	107	36	94	3.73646	1.36259	2.48174	-1.45532	-0.59032	+	gt-ag
NA	X	6097712	6101217	34	36	74	1.18729	1.36259	1.95371	0.198688	0.718549	+	gt-ag
NA	X	6280101	6323574	52627	142700	240436	1837.74	5401.17	6347.87	1.55534	1.78834	+	at-ac
NA	X	6280150	6323623	7327	16570	26500	255.86	627.172	699.64	1.29351	1.45126	+	at-ac
NA	X	6280141	6326514	9608	35366	58413	335.513	1338.6	1542.19	1.99628	2.20054	+	at-ac
NA	X	6280150	6326523	7653	16894	26506	267.244	639.435	699.798	1.25864	1.38878	+	at-ac
NA	X	6280141	6329286	9608	21534	34470	335.513	815.058	910.059	1.28053	1.43959	+	at-ac
NA	X	6280150	6329295	7073	16362	26460	246.99	619.299	698.583	1.32618	1.49998	+	at-ac
NA	X	6280141	6331835	371	1031	1055	12.9554	39.0232	27.8536	1.59078	1.10431	+	at-ac
NA	X	6280141	6334448	8990	20151	32497	313.932	762.712	857.969	1.28068	1.45047	+	at-ac
NA	X	6323613	6334448	8991	24388	38677	313.967	923.082	1021.13	1.55584	1.70148	+	at-ac
NA	X	6323613	6326514	9609	55269	95513	335.548	2091.92	2521.69	2.64024	2.9098	+	at-ac
NA	X	6323622	6326523	7627	27289	59562	266.336	1032.88	1572.53	1.95536	2.56176	+	at-ac
NA	X	6323613	6329286	9608	26514	41408	335.513	1003.55	1093.23	1.58067	1.70416	+	at-ac
NA	X	6323622	6329295	7075	26759	59506	247.06	1012.82	1571.05	2.03545	2.66879	+	at-ac
NA	X	6323613	6331835	377	1050	1086	13.1649	39.7423	28.672	1.59398	1.12295	+	at-ac
NA	X	6924414	6924616	12	76	22	0.419042	2.87659	0.580833	2.77919	0.471027	-	NN-NN
NA	X	8003921	8007805	68	13	125	2.37457	0.492048	3.30019	-2.2708	0.47488	+	gc-ag
NA	X	8367897	8368536	34	47	109	1.18729	1.77894	2.87776	0.583352	1.27728	+	gt-ag
NA	X	8740153	8740561	494	31	16	17.2506	1.17335	0.422424	-3.87794	-5.35181	+	gt-ag
NA	X	8788878	8789456	28	30	69	0.977765	1.1355	1.8217	0.215762	0.897728	+	gt-ag
NA	X	9097454	9098333	2161	2348	4495	75.4625	88.8714	118.675	0.235959	0.65318	+	gt-ag
NA	X	10168295	10168440	26	22	109	0.907925	0.832697	2.87776	-0.124782	1.6643	+	gt-ag
NA	X	10218727	10218814	394	143	76	13.7586	5.41253	2.00651	-1.34595	-2.77757	-	NN-NN
NA	X	10636055	10644409	70	111	55	2.44441	4.20133	1.45208	0.781359	-0.751365	+	gt-ag
NA	X	11306337	11306518	18	54	39	0.628563	2.04389	1.02966	1.70119	0.712035	-	NN-NN
NA	X	11578822	11581794	70	38	106	2.44441	1.43829	2.79856	-0.76513	0.195196	+	gt-ag
NA	X	12049345	12057015	12	12	26	0.419042	0.454198	0.686439	0.116226	0.712035	-	NN-NN
NA	X	12148246	12148620	338	42	330	11.803	1.58969	8.71249	-2.89234	-0.437999	+	gt-ag
NA	X	12150762	12151045	43	155	12	1.50157	5.86673	0.316818	1.96609	-2.24474	-	NN-NN
NA	X	12151106	12151367	30	102	62	1.04761	3.86068	1.63689	1.88176	0.643864	-	NN-NN
NA	X	12301541	12301620	158	27	135	5.51739	1.02195	3.5642	-2.43267	-0.630407	-	NN-NN
NA	X	13068237	13069579	53	47	89	1.85077	1.77894	2.34973	-0.0571056	0.344371	-	NN-NN
NA	X	13789077	13789155	110	161	167	3.84122	6.09382	4.40905	0.665783	0.198903	+	gt-ag
NA	X	14271200	14272013	29	26	30	1.01269	0.984096	0.792045	-0.0413153	-0.354532	+	gt-ag
NA	X	15127582	15147672	94	111	137	3.2825	4.20133	3.617	0.356053	0.140001	-	NN-NN
NA	X	15507372	15507522	255	22	84	8.90465	0.832697	2.21773	-3.4187	-2.00548	-	NN-NN
NA	X	15698998	15708219	12	22	29	0.419042	0.832697	0.765643	0.990695	0.869577	+	gt-ag
NA	X	15879344	15882073	67	32	221	2.33965	1.21119	5.83473	-0.949863	1.31837	+	gt-ag
NA	X	16222360	16223371	123	94	245	4.29518	3.55789	6.46837	-0.2717	0.590682	+	gt-ag
NA	X	16235406	16235493	45	71	140	1.57141	2.68734	3.69621	0.77412	1.23399	+	gt-ag
NA	X	16264029	16268520	603	501	724	21.0569	18.9628	19.1147	-0.151121	-0.13961	-	NN-NN
NA	X	16264822	16269302	205	131	55	7.15864	4.95833	1.45208	-0.529831	-2.30156	-	NN-NN
NA	X	16904766	16904868	82	73	130	2.86346	2.76304	3.43219	-0.0515015	0.261374	+	gt-ag
NA	X	16986679	16989556	82	121	43	2.86346	4.57983	1.13526	0.677537	-1.33473	+	gt-ag
NA	X	16989671	17001730	122	77	128	4.26026	2.91444	3.37939	-0.547725	-0.334179	+	gt-ag
NA	X	17008332	17008758	520	420	625	18.1585	15.8969	16.5009	-0.191896	-0.138097	+	gt-ag
NA	X	17231751	17231837	203	132	227	7.0888	4.99618	5.99314	-0.504716	-0.242229	+	gt-ag
NA	X	17234867	17301786	700	458	451	24.4441	17.3352	11.9071	-0.495781	-1.03767	-	NN-NN
NA	X	17480791	17481131	3574	8360	6547	124.805	316.425	172.851	1.34219	0.469852	+	gt-ag
NA	X	17566821	17566985	122	50	14	4.26026	1.89249	0.369621	-1.17066	-3.52682	-	NN-NN
NA	X	17571941	17579796	177	60	179	6.18087	2.27099	4.72587	-1.44449	-0.387232	-	NN-NN
NA	X	17688158	17689723	191	95	172	6.66976	3.59573	4.54106	-0.891347	-0.554606	-	NN-NN
